# Supplementary material for: Allele-specific gene-editing approach for vision loss restoration in RHO-associated retinitis pigmentosa
Source: eLife journal article supplement (doi:10.7554/elife.84065), 2023-06-05
Supplement: data3 [file Figure 5CSource Data 1.xlsx]

## Sheet: Figure 5D–Source Data 1
mapping_regon	Reads num	Proportion	Insert_info
GAATGGCACAGAAGGCCCTAACTTCTACGTGCCCTTCTCCAATGCGATGGGTGTGGTACGCAGCCCCTTCGAGTACCCACAGTACTACCTGGCTGAGCCATG	79389	0.76542	0
GAATGGCACAGAAGGCCCTAACTTCTACGTGCCCTTCTCCAATGCGACGGGTGTGGTACGCAGCCCCTTCGAGTACCCACAGTACTACCTGGCTGAGCCATG	3426	0.03303	0
GAATGGCACAGAAGGCCCTAACTTCTACGTGCCCTTCTCCAAT-CGATGGGTGTGGTACGCAGCCCCTTCGAGTACCCACAGTACTACCTGGCTGAGCCATG	2793	0.02693	0
GAACGGCACAG-AGGCCC-AA-TT-TATGTGCCCTTCTCCAA--CGA--GGCGTGGT--GCAGCCCCTTCGAG--CCCGCAGTACTACCTGGC-GA-CCATG	1881	0.01814	14GC22TT44TCAC59GG74AG94GA
GAATGGCACAGAAGGCCCTAACTTCTACGTGCCCTTCTCCAATG-GATGGGTGTGGTACGCAGCCCCTTCGAGTACCCACAGTACTACCTGGCTGAGCCATG	1372	0.01323	0
GAATGGCACAGAAGGCCCTAACTTCTACGTGCCCTTCTCCAA--CGATGGGTGTGGTACGCAGCCCCTTCGAGTACCCACAGTACTACCTGGCTGAGCCATG	1270	0.01224	0
GAATGGCACAGAAGGCCCTAACTTCTACGTGCCCTTCTCCAAT--GATGGGTGTGGTACGCAGCCCCTTCGAGTACCCACAGTACTACCTGGCTGAGCCATG	1240	0.01196	0
GAATGGCACAGAAGGCCCTAACTTCTACGTGCCCTTCTCCAATGCGATGGGTGTGGTACGCAGCCCCTTCGAGTACCCACAGTACTACCTGGCTGAGCCATG	901	0.00869	43G
GAATGGCACAGAAGGCCCTAACTTCTACGTGCCCTTCTCCAATGCGATGGGTGTGGTACGCAGCCCCTTCGAGTACCCACAGTACTACCTGGCTGAGCCATG	429	0.00414	44C
GAATGGCACAGAAGGCCCTAACTTCTACGTGCCCTTCTCCA---CGATGGGTGTGGTACGCAGCCCCTTCGAGTACCCACAGTACTACCTGGCTGAGCCATG	263	0.00254	0
GAATGGCACAGAAGGCCCTAACTTCTACGTGCCCTTCTCCAATG---TGGGTGTGGTACGCAGCCCCTTCGAGTACCCACAGTACTACCTGGCTGAGCCATG	234	0.00226	0
GAATGGCACAGAAGGCCCTAACTTCTACGTGCCCTTCTCCA-----ATGGGTGTGGTACGCAGCCCCTTCGAGTACCCACAGTACTACCTGGCTGAGCCATG	228	0.0022	0
GAATGGCACAGAAGGCCCTAACTTCTACGTGCCCTTCTCCAATGCGATGGGTGTGGTACGCAGCCCCTTCGAGTACCCACAGTACTACCTGGCTGAGCCATG	217	0.00209	44T
GAATGGCACAGAAGGCCCTAACTTCTACGTGCCCTTCTCC----CGATGGGTGTGGTACGCAGCCCCTTCGAGTACCCACAGTACTACCTGGCTGAGCCATG	151	0.00146	0
GAATGGCACAGAAGGCCCTAACTTCTACGTGCCCTTCTCCAATGGGATGGGTGTGGTACGCAGCCCCTTCGAGTACCCACAGTACTACCTGGCTGAGCCATG	138	0.00133	0
GAATGGCACAGAAGGCCCTAACTTCTACGTGCCCTTCTCCAA-GCGATGGGTGTGGTACGCAGCCCCTTCGAGTACCCACAGTACTACCTGGCTGAGCCATG	122	0.00118	0
GAATGGCACAGAAGGCCCTAACTTCTACGTGCCCTTCTCCAAT------GGTGTGGTACGCAGCCCCTTCGAGTACCCACAGTACTACCTGGCTGAGCCATG	121	0.00117	0
GAATGGCACAGAAGGCCCTAACTTCTACGTGCCCTTCTCCAATGCGATGGGTGTGGTACGCAGCCCCTTCGAGTACCCACAGTACTACCTGGCTGAGCCATG	120	0.00116	44A
GAATGGCACAGAAGGCCCTAACTTCTACGTGCCCTTCTCCAATGCGATGGGTGTGGTACGCAGCCCCTTCGAGTACCCACAGTACTACCTGGCTGGGCCATG	107	0.00103	0
GAATGGCACAGAAGGCCCTAACTTCTACGTGCCCTT--------CGATGGGTGTGGTACGCAGCCCCTTCGAGTACCCACAGTACTACCTGGCTGAGCCATG	96	0.00093	0
GAATGGCACAGAAGGCCCTAACTTCTACGTGCCCTTC-------CGATGGGTGTGGTACGCAGCCCCTTCGAGTACCCACAGTACTACCTGGCTGAGCCATG	89	0.00086	0
GAATGGCACAGAAGGCCCTAACTTCTACGTGCCCTTCTC-----CGATGGGTGTGGTACGCAGCCCCTTCGAGTACCCACAGTACTACCTGGCTGAGCCATG	82	0.00079	0
GAATGGCACAGAAGGCCCTAACTTCTACGTGCCCTTCTCCAATGCGATGGGCGTGGTACGCAGCCCCTTCGAGTACCCACAGTACTACCTGGCTGAGCCATG	77	0.00074	0
GAATGGCACAGAAGGCCCTAACTTCTACGTGCCCTTCTCCAATGTGATGGGTGTGGTACGCAGCCCCTTCGAGTACCCACAGTACTACCTGGCTGAGCCATG	76	0.00073	0
GAATGGCACAGAAGGCCCTAACTTCTACGTGCCCTTCTCCAATGCGATGGGTGTGGTACACAGCCCCTTCGAGTACCCACAGTACTACCTGGCTGAGCCATG	75	0.00072	0
GAATGGCACAGAAGGCCCTAACTTCTACGTGCCCTTCTCCAATG----GGGTGTGGTACGCAGCCCCTTCGAGTACCCACAGTACTACCTGGCTGAGCCATG	70	0.00067	0
GAATGACACAGAAGGCCCTAACTTCTACGTGCCCTTCTCCAATGCGATGGGTGTGGTACGCAGCCCCTTCGAGTACCCACAGTACTACCTGGCTGAGCCATG	70	0.00067	0
GAATGGCACAGAAGGCCCTAACTTCTACGTGCCCTTCT------CGATGGGTGTGGTACGCAGCCCCTTCGAGTACCCACAGTACTACCTGGCTGAGCCATG	69	0.00067	0
GAATGGCACAGAAGGCCCTAACTTCTACATGCCCTTCTCCAATGCGATGGGTGTGGTACGCAGCCCCTTCGAGTACCCACAGTACTACCTGGCTGAGCCATG	67	0.00065	0
GAATGGTACAGAAGGCCCTAACTTCTACGTGCCCTTCTCCAATGCGATGGGTGTGGTACGCAGCCCCTTCGAGTACCCACAGTACTACCTGGCTGAGCCATG	67	0.00065	0
GAATGGCACAGAAGGCCCTAACTTCTACGTGCCCTTCTCCAATGCGATGGGTGTGGTACGCAACCCCTTCGAGTACCCACAGTACTACCTGGCTGAGCCATG	63	0.00061	0
GAATGGCACAGAAGGCCCTAACTTCTACGCGCCCTTCTCCAATGCGATGGGTGTGGTACGCAGCCCCTTCGAGTACCCACAGTACTACCTGGCTGAGCCATG	62	0.0006	0
GAATGGCACAGAAGGCCCTAACTTCTACGTGCCCTTCTCCAATGCGATGGGTGTGGTACGCAGCCCCTTCGAGTACCCACAGTACTACCTGGCTGAGTCATG	62	0.0006	0
GAATGGCACAGAAGGCCCTAACTTCTACGTGCCCTTCTCCAATGCGATGGGTGTGGTACGCAGTCCCTTCGAGTACCCACAGTACTACCTGGCTGAGCCATG	62	0.0006	0
GAATGGCACAGAAGGCCCTAACTTCTACGTGCCCTTCTCCAA---------TGTGGTACGCAGCCCCTTCGAGTACCCACAGTACTACCTGGCTGAGCCATG	58	0.00056	0
GAATGGCACAGAAGGCCCTAACTTCTACGTGCCCTTCTCCAATGCGATGGGTGTGGTACGCAGCCCCTTCGAGTACCCACAGTACTACCTGGCCGAGCCATG	56	0.00054	0
GAATGGCACAGAAGGCCCTAACTTCTACGTGCCCTTCTCCAAT-------GTGTGGTACGCAGCCCCTTCGAGTACCCACAGTACTACCTGGCTGAGCCATG	56	0.00054	0
GAATGGCACAGAAGGCCCTAACTTCTACGTGCCCTTCTCCAATGCGATGGGTGTGGCACGCAGCCCCTTCGAGTACCCACAGTACTACCTGGCTGAGCCATG	56	0.00054	0
GAATGGCACAGAAGGCCCTAACTTCTATGTGCCCTTCTCCAATGCGATGGGTGTGGTACGCAGCCCCTTCGAGTACCCACAGTACTACCTGGCTGAGCCATG	54	0.00052	0
GAATGGCACAGAAGGCCCTAACTTCTACGTGCCCTTCTCCAATGCGATGGGTGTGGTACGCAGCCCCTTCGAGTACCCACGGTACTACCTGGCTGAGCCATG	54	0.00052	0
GAATGGCACAGAAGGCCCTAACTTCTACGTGCCCTTCTCCAATGCGATGGGTGTGGTACGCAGCCCCTTCGAGTACCCACAGTACTACCTGGTTGAGCCATG	53	0.00051	0
GAATGGCACAGAAGGCCCTAACTTCTACGTGCCCTTCTCCAATGCGATGGGTGTGGTACGTAGCCCCTTCGAGTACCCACAGTACTACCTGGCTGAGCCATG	47	0.00045	0
GAATGGCACAGAAGGCCCTAACTTCTACGTGCCCTTCTCCAATGCGATGGGTGTGGTACGCAGCCCCTTCAAGTACCCACAGTACTACCTGGCTGAGCCATG	47	0.00045	0
GAATGGCACAGAAGGCCCTAACTTCTACGTGCCCTTCTCCAA-----------TGGTACGCAGCCCCTTCGAGTACCCACAGTACTACCTGGCTGAGCCATG	46	0.00044	0
GAATGGCACAGAAGGCCCTAACTTCTACGTGCCCTTCTCCAATGCGATGGGTGTGGTACGCAGCCCCCTCGAGTACCCACAGTACTACCTGGCTGAGCCATG	45	0.00043	0
GAATGGCACAGAAGGCCCTAACTTCTACGTGCCCTTCTCCAATGCGATGGATGTGGTACGCAGCCCCTTCGAGTACCCACAGTACTACCTGGCTGAGCCATG	45	0.00043	0
GAATGGCACAGAAGGCCCTAACTTCTACGTACCCTTCTCCAATGCGATGGGTGTGGTACGCAGCCCCTTCGAGTACCCACAGTACTACCTGGCTGAGCCATG	44	0.00042	0
GAATGGCACAGAAGGCCCTAACTTCTACGTGCCCTTCTCCAATGCGATGGGTGTGGTACGCAGCCCCTTCGAGTACCCACAGTACTACCTGGCTGAGCCATG	44	0.00042	43GC
GAATGGCACAGAAGGCCCTAACTTCTACGTGCCCTTCTCCGATGCGATGGGTGTGGTACGCAGCCCCTTCGAGTACCCACAGTACTACCTGGCTGAGCCATG	43	0.00041	0
GAATGGCACAGAAGGCCCTAACTTCTACGTGCCCTTCTCCAATGCAATGGGTGTGGTACGCAGCCCCTTCGAGTACCCACAGTACTACCTGGCTGAGCCATG	43	0.00041	0
GAATGGCACGGAAGGCCCTAACTTCTACGTGCCCTTCTCCAATGCGATGGGTGTGGTACGCAGCCCCTTCGAGTACCCACAGTACTACCTGGCTGAGCCATG	43	0.00041	0
GAATGGCACAGAAGGCCCTAACTTCTACGTGCCCTTCTCCAATGCGATGGGTGTGGTACGCAGCCCCTTCGAGTACCCACAGTACTACCTGACTGAGCCATG	43	0.00041	0
GAATGGCACAGAAGGCCCTAACTTCTACGTGCCCTTCTCCAATGCGATGGGTGTGGTACGCAGCCCCTTCGGGTACCCACAGTACTACCTGGCTGAGCCATG	42	0.0004	0
GAATGGCACAGAAGGCCCTAACTTCTACGTGTCCTTCTCCAATGCGATGGGTGTGGTACGCAGCCCCTTCGAGTACCCACAGTACTACCTGGCTGAGCCATG	42	0.0004	0
GAATGGCACAGAAGGCCCTAACTTCTACGTGCCCTTCTCCAATGCGATGGGTGTGGTACGCAGCCCCTTTGAGTACCCACAGTACTACCTGGCTGAGCCATG	42	0.0004	0
GAATGGCACAGAAGGCCCTAACTTCTACGTGCCCTTCTCCAATGCGATGGGTGTGGTACGCGGCCCCTTCGAGTACCCACAGTACTACCTGGCTGAGCCATG	40	0.00039	0
GAATGGCACAGAAGGCCCTAACTTCTACGTGCCCTTCTCCAATGCGATGGGTGCGGTACGCAGCCCCTTCGAGTACCCACAGTACTACCTGGCTGAGCCATG	40	0.00039	0
GGATGGCACAGAAGGCCCTAACTTCTACGTGCCCTTCTCCAATGCGATGGGTGTGGTACGCAGCCCCTTCGAGTACCCACAGTACTACCTGGCTGAGCCATG	40	0.00039	0
GAATGGCACAGAAGGCCCTAACTTCTACGTGCCCTTCTCCAATGCGATGGGTATGGTACGCAGCCCCTTCGAGTACCCACAGTACTACCTGGCTGAGCCATG	39	0.00038	0
GAATGGCACAGAAGGCCCTAACTTCTACGTGCCCTCCTCCAATGCGATGGGTGTGGTACGCAGCCCCTTCGAGTACCCACAGTACTACCTGGCTGAGCCATG	39	0.00038	0
AAATGGCACAGAAGGCCCTAACTTCTACGTGCCCTTCTCCAATGCGATGGGTGTGGTACGCAGCCCCTTCGAGTACCCACAGTACTACCTGGCTGAGCCATG	39	0.00038	0
GAATGGCACAGAAGGCCCTAACTTCTACGTGCCATTCTCCAATGCGATGGGTGTGGTACGCAGCCCCTTCGAGTACCCACAGTACTACCTGGCTGAGCCATG	39	0.00038	0
GAATGGCACAGAAGGCCATAACTTCTACGTGCCCTTCTCCAATGCGATGGGTGTGGTACGCAGCCCCTTCGAGTACCCACAGTACTACCTGGCTGAGCCATG	39	0.00038	0
GAATGGCACAGAAGGCCCTAACTTCTACGTGCCCTTCTCCAATGCGATGGGTGTGGTACGCAGCCCCTTCGAGTACCCACAGTACTACCTGGCTGAACCATG	38	0.00037	0
GAATGGCACAGAAGGCCCTAACTTCTACGTGCCCTTCTCCAATGCGATGGGTGTGATACGCAGCCCCTTCGAGTACCCACAGTACTACCTGGCTGAGCCATG	38	0.00037	0
GAACGGCACAGAAGGCCCTAACTTCTACGTGCCCTTCTCCAATGCGATGGGTGTGGTACGCAGCCCCTTCGAGTACCCACAGTACTACCTGGCTGAGCCATG	38	0.00037	0
GAATGGCACAGAAGGCCCTAACTTCTACGTGCCCTTCTCCAATGCGATGGGTGTGGTACGCAGCCCCTTCGAGTACCCACAGTACTACCTGGCTGAGCCACG	35	0.00034	0
GAGTGGCACAGAAGGCCCTAACTTCTACGTGCCCTTCTCCAATGCGATGGGTGTGGTACGCAGCCCCTTCGAGTACCCACAGTACTACCTGGCTGAGCCATG	33	0.00032	0
GAATGGCACAGAAGGCCCTAACTTCTACGTGCCCTTCTCCAATGCGATGGGTGTGGTACGCAGCCCCTTCGAGTACCCACAGTATTACCTGGCTGAGCCATG	33	0.00032	0
GAATGGCACAGAAGGCCCTAACTTCTACGTGCCCTTCCCCAATGCGATGGGTGTGGTACGCAGCCCCTTCGAGTACCCACAGTACTACCTGGCTGAGCCATG	33	0.00032	0
GAATGGCACAGAAGGCCCTAACTTCTACGTGCCCTTCTCCAATGCGATGGGTGTGGTACGCAGCCCCTTCGAGTACCCACAGTACTACCCGGCTGAGCCATG	33	0.00032	0
GAATGGCACAGAAGGCCCTAACTTCTACGTGCCCTTCTCCAATGCGATGGGTGTGGTACGCAGCCCCTTCGAGTACCCACAGTACCACCTGGCTGAGCCATG	32	0.00031	0
GAATGGCACAGAAGGCCCTAACTTCTACGTGCCCTTCTCCAATGCGATGGGTGTGGTACGCAGCCCCTTCGAGTACCCACAGTACTACCTGGCTAAGCCATG	31	0.0003	0
GAATGGCACAGAAGGCCCTAACTTCTACGTGCCCTTCTCCAATGCGATGGGTGTGGTACGCAGCCCCTTCGAGTACCCATAGTACTACCTGGCTGAGCCATG	31	0.0003	0
GAATGGCACAGGAGGCCCTAACTTCTACGTGCCCTTCTCCAATGCGATGGGTGTGGTACGCAGCCCCTTCGAGTACCCACAGTACTACCTGGCTGAGCCATG	31	0.0003	0
GAATGGCACAGAAGGTCCTAACTTCTACGTGCCCTTCTCCAATGCGATGGGTGTGGTACGCAGCCCCTTCGAGTACCCACAGTACTACCTGGCTGAGCCATG	30	0.00029	0
GAATGGCACAGAAGGCCCTAACTTCTACGTGCCCTTCTCCAAT------------GTACGCAGCCCCTTCGAGTACCCACAGTACTACCTGGCTGAGCCATG	30	0.00029	0
GAATGGCACAGAAGGCCCTAACTTCTACGTGCCCTTCTCCAATGCGATGGGTGTGGTACGCACCCCCTTCGAGTACCCACAGTACTACCTGGCTGAGCCATG	29	0.00028	0
GAATGGCACAGAAGGCCCTAACTTCTACGTGCCCTTCTCCAATGCGGTGGGTGTGGTACGCAGCCCCTTCGAGTACCCACAGTACTACCTGGCTGAGCCATG	29	0.00028	0
GAATGGCATAGAAGGCCCTAACTTCTACGTGCCCTTCTCCAATGCGATGGGTGTGGTACGCAGCCCCTTCGAGTACCCACAGTACTACCTGGCTGAGCCATG	29	0.00028	0
GAATGGCACAGAAGGCCCTAACTTCTACGTGCCCCTCTCCAATGCGATGGGTGTGGTACGCAGCCCCTTCGAGTACCCACAGTACTACCTGGCTGAGCCATG	29	0.00028	0
GAATGGCGCAGAAGGCCCTAACTTCTACGTGCCCTTCTCCAATGCGATGGGTGTGGTACGCAGCCCCTTCGAGTACCCACAGTACTACCTGGCTGAGCCATG	29	0.00028	0
GAATGGCACAGAAGGCCCTAACTTCCACGTGCCCTTCTCCAATGCGATGGGTGTGGTACGCAGCCCCTTCGAGTACCCACAGTACTACCTGGCTGAGCCATG	28	0.00027	0
GAATGGCACAGAAGGCCCTAACTTCTACGTGCCCTTCTCCAATGCGATGGGTGTGGTACGCAGCCCCTTCGAGCACCCACAGTACTACCTGGCTGAGCCATG	28	0.00027	0
GCATGGCACAGAAGGCCCTAACTTCTACGTGCCCTTCTCCAATGCGATGGGTGTGGTACGCAGCCCCTTCGAGTACCCACAGTACTACCTGGCTGAGCCATG	27	0.00026	0
GAATGGCACAGAAGGCCCTAACTTCTACGTGCCCTTCTCCAATTCGATGGGTGTGGTACGCAGCCCCTTCGAGTACCCACAGTACTACCTGGCTGAGCCATG	27	0.00026	0
GAATGGCACAGAAGGCCCTAACTTCTACGTGCCCTTCTCCAATGCGATGGGTGTGGTATGCAGCCCCTTCGAGTACCCACAGTACTACCTGGCTGAGCCATG	27	0.00026	0
GAATGGCACAGAAGGCCCTAACTTCTACGTGCACTTCTCCAATGCGATGGGTGTGGTACGCAGCCCCTTCGAGTACCCACAGTACTACCTGGCTGAGCCATG	27	0.00026	0
GAATGGCACAGAATGCCCTAACTTCTACGTGCCCTTCTCCAATGCGATGGGTGTGGTACGCAGCCCCTTCGAGTACCCACAGTACTACCTGGCTGAGCCATG	27	0.00026	0
GACTGGCACAGAAGGCCCTAACTTCTACGTGCCCTTCTCCAATGCGATGGGTGTGGTACGCAGCCCCTTCGAGTACCCACAGTACTACCTGGCTGAGCCATG	27	0.00026	0
GAATGGCACAGAAGGCCCTAACTTCTACGTGCCCTTCTCCAATGCGATGGGTGTGGTACGCAGCCCCTTCGAATACCCACAGTACTACCTGGCTGAGCCATG	26	0.00025	0
GAATGGCACAGAAGGCCCTAACTTCTACGTGCCCTTCTCCAATGAGATGGGTGTGGTACGCAGCCCCTTCGAGTACCCACAGTACTACCTGGCTGAGCCATG	26	0.00025	0
GAATGGCACAGAAGGCCCCAA-TT-TATGTGCCCTTCTCCAA--CGA--GGCGTGGT--GCAGCCCCTTCGAG--CCCGCAGTACTACCTGGC-GA-CCATG	26	0.00025	22TT44TCAC59GG74AG94GA
GAATTGCACAGAAGGCCCTAACTTCTACGTGCCCTTCTCCAATGCGATGGGTGTGGTACGCAGCCCCTTCGAGTACCCACAGTACTACCTGGCTGAGCCATG	26	0.00025	0
GAATGGCACAGAAGGCCCCAACTTCTACGTGCCCTTCTCCAATGCGATGGGTGTGGTACGCAGCCCCTTCGAGTACCCACAGTACTACCTGGCTGAGCCATG	26	0.00025	0
GAATAGCACAGAAGGCCCTAACTTCTACGTGCCCTTCTCCAATGCGATGGGTGTGGTACGCAGCCCCTTCGAGTACCCACAGTACTACCTGGCTGAGCCATG	26	0.00025	0
GAATGGCACAGAAGGCCCTAACTTCTACGTGCCCTTCTCCAATGCGATGGGTGTGGTACGCAGCCCCTTCGAGTACCTACAGTACTACCTGGCTGAGCCATG	26	0.00025	0
GAATGGCACAGAAGGCCCTAACTTCTACGTGCCCTTCTCCAATGCGATGGGTGTGGTACGCAGCCCCTTCGAGTACCCACAGTACTACCTGGCTGTGCCATG	25	0.00024	0
GAATGGCACAGAAGGCCCTAACTTCTACGTGCCCTTCTCCAATGCGATGGGTGTGGTACGCAGCCCCATCGAGTACCCACAGTACTACCTGGCTGAGCCATG	25	0.00024	0
GAATGGCACAGAAGGCCCTAACTTCTACGTGCCCTTCTCCAATGC-ATGGGTGTGGTACGCAGCCCCTTCGAGTACCCACAGTACTACCTGGCTGAGCCATG	25	0.00024	0
TAATGGCACAGAAGGCCCTAACTTCTACGTGCCCTTCTCCAATGCGATGGGTGTGGTACGCAGCCCCTTCGAGTACCCACAGTACTACCTGGCTGAGCCATG	25	0.00024	0
GAATGGCACAGAAGGCCCTAACTTCTACGTGCCCTTCTCCAATGCTATGGGTGTGGTACGCAGCCCCTTCGAGTACCCACAGTACTACCTGGCTGAGCCATG	25	0.00024	0
GAATGGCACAGAAGGCCCTAACTTCTGCGTGCCCTTCTCCAATGCGATGGGTGTGGTACGCAGCCCCTTCGAGTACCCACAGTACTACCTGGCTGAGCCATG	25	0.00024	0
GAATGGCACAGAAGGCCCTAACTTCTACGTGCCCTTCTCCAATGCGATGGGTGTGGTACGCAGCCCCTTCGAGTACCCACAGTACTACATGGCTGAGCCATG	24	0.00023	0
GAATGGCACAGAAGGCCCTGACTTCTACGTGCCCTTCTCCAATGCGATGGGTGTGGTACGCAGCCCCTTCGAGTACCCACAGTACTACCTGGCTGAGCCATG	24	0.00023	0
GAATGGCACAGAAGGCCCTAACTTCTACGTGCCCTTCTCCAATGCGATGGGTGTGGTACGCAGCCCCTTCGAGTACCCACAGTGCTACCTGGCTGAGCCATG	24	0.00023	0
GAATGGCACAGAAGGCCCTAACTTCTACGTGCCCTTCTCCAATGCGATGGGTGTGGTACGCAGCCCCTTCGAGTACCCACAGTACTGCCTGGCTGAGCCATG	24	0.00023	0
GAATGGCACAGAAGGCCCTAACTTCTACGTGCCCTTCTCCAATGCGATGGGTTTGGTACGCAGCCCCTTCGAGTACCCACAGTACTACCTGGCTGAGCCATG	24	0.00023	0
GAATGGCACAGAAGGCCCTAACTTCTACGTGCCCTTCTCCAATGCGATGGGTGTGGTACGCAGCCCCTTCGAGTACCCACAGTACTACCTGGCTGAGCCATA	23	0.00022	0
GAATGGCACATAAGGCCCTAACTTCTACGTGCCCTTCTCCAATGCGATGGGTGTGGTACGCAGCCCCTTCGAGTACCCACAGTACTACCTGGCTGAGCCATG	23	0.00022	0
GAATGGCACAGAAGGCCCTAACTTCTACGTGCCCTTCTCCAATGCGATGGGTGTAGTACGCAGCCCCTTCGAGTACCCACAGTACTACCTGGCTGAGCCATG	23	0.00022	0
GAATGGCACAGACGGCCCTAACTTCTACGTGCCCTTCTCCAATGCGATGGGTGTGGTACGCAGCCCCTTCGAGTACCCACAGTACTACCTGGCTGAGCCATG	23	0.00022	0
GAATGGCACAGAAGGCACTAACTTCTACGTGCCCTTCTCCAATGCGATGGGTGTGGTACGCAGCCCCTTCGAGTACCCACAGTACTACCTGGCTGAGCCATG	23	0.00022	0
GAATGGCACAGAGGGCCCTAACTTCTACGTGCCCTTCTCCAATGCGATGGGTGTGGTACGCAGCCCCTTCGAGTACCCACAGTACTACCTGGCTGAGCCATG	23	0.00022	0
GAATGGCACAGAAGGCCCTAACTTCTACGTGCCCTTCTCCAACGCGATGGGTGTGGTACGCAGCCCCTTCGAGTACCCACAGTACTACCTGGCTGAGCCATG	22	0.00021	0
GAATGGCACAGAAGGCCCTAACTTCTACGTGCCCTTCTCTAATGCGATGGGTGTGGTACGCAGCCCCTTCGAGTACCCACAGTACTACCTGGCTGAGCCATG	22	0.00021	0
GAATGGCACAGAAGGCCCTAACTTCTACGTGCCCTTCTCCAATGCGATGGGTGTGGTACGCAGCCCCTTCGAGTAACCACAGTACTACCTGGCTGAGCCATG	22	0.00021	0
GAATGGCACAGAAGGCCCTAACTTCTACGTGCCCTTCTCCAATG--------GTGGTACGCAGCCCCTTCGAGTACCCACAGTACTACCTGGCTGAGCCATG	22	0.00021	0
GAATGGCACAGAAGGCCCTAACCTCTACGTGCCCTTCTCCAATGCGATGGGTGTGGTACGCAGCCCCTTCGAGTACCCACAGTACTACCTGGCTGAGCCATG	22	0.00021	0
GAATGGCACAGAAGGCCCTAACTTCTACGTGCCCTTCTCCAATGCGATGGGTGTGGTACTCAGCCCCTTCGAGTACCCACAGTACTACCTGGCTGAGCCATG	21	0.0002	0
GAATGGCACAGAAGGCCCTAACTTCTACGTGCCCTTCTCCAATGCGATGGGTGTGGTGCGCAGCCCCTTCGAGTACCCACAGTACTACCTGGCTGAGCCATG	21	0.0002	0
GAATGGCACAAAAGGCCCTAACTTCTACGTGCCCTTCTCCAATGCGATGGGTGTGGTACGCAGCCCCTTCGAGTACCCACAGTACTACCTGGCTGAGCCATG	21	0.0002	0
GAATGGCACAGAAGGCCCTAACTTCTACGTGCCCTTCTCCAA--CGA--GGCGTGGT--GCAGCCCCTTCGAG--CCCGCAGTACTACCTGGC-GA-CCATG	21	0.0002	44TCAC59GG74AG94GA
GAATGGCACAGAAGGCCCTAACTTCTACGTGCCCTTCTCCAATGCGATGGGTGTGGTACGCAGCCCCTTCGAGTACCCACAGTACTACCTGGCTGAGCTATG	21	0.0002	0
GAATGGCACAGAAGGCCCTAACTTCTACGTGCCCTTCTCCAATGCGATGGGTGTGGTACGCAGCCCCTCCGAGTACCCACAGTACTACCTGGCTGAGCCATG	21	0.0002	0
GAATGGCACAGAAGGACCTAACTTCTACGTGCCCTTCTCCAATGCGATGGGTGTGGTACGCAGCCCCTTCGAGTACCCACAGTACTACCTGGCTGAGCCATG	21	0.0002	0
GAATGGCACAGAAGGCCCTAACTTCTACGTGCCCTTCTCCAAT----------------GCAGCCCCTTCGAGTACCCACAGTACTACCTGGCTGAGCCATG	21	0.0002	0
GAATGGCACAGAAGGCCCTAACTTCTACGTGCCCTTCTCCAATGCGATGGGGGTGGTACGCAGCCCCTTCGAGTACCCACAGTACTACCTGGCTGAGCCATG	20	0.00019	0
GAATGGCACAGAAGGCCCTAACTTCTACGTGCCCTTCTCCAATGCGATGGGTGTGGTACGCAGCCCCTTCGAGTACCCACAGTACTACCTGGCTGAGCCATT	20	0.00019	0
GAATGGCACAGAAGGCCCTAACTTCTACGTGCCCTTCTCCACTGCGATGGGTGTGGTACGCAGCCCCTTCGAGTACCCACAGTACTACCTGGCTGAGCCATG	20	0.00019	0
GAATGGCACAGAAGACCCTAACTTCTACGTGCCCTTCTCCAATGCGATGGGTGTGGTACGCAGCCCCTTCGAGTACCCACAGTACTACCTGGCTGAGCCATG	20	0.00019	0
GAATGGCACAGAAGGCCCTAACTTCTACGTGCCCTTCTCCAATGCGATGGGTGTGGTACGCAGCCCCTTCGATTACCCACAGTACTACCTGGCTGAGCCATG	20	0.00019	0
GAATGGCACAGAAGGCCCTAACTTCTACGTGCCCTTCTCCAATGCGATGGGTGTGGTACGCAGCCCATTCGAGTACCCACAGTACTACCTGGCTGAGCCATG	19	0.00018	0
GAATGGCACAGAAGTCCCTAACTTCTACGTGCCCTTCTCCAATGCGATGGGTGTGGTACGCAGCCCCTTCGAGTACCCACAGTACTACCTGGCTGAGCCATG	19	0.00018	0
GAATGGCACAGAAGGCCCTAACTTCTACGTGCCCTTCTCCAATGCGATGGGTGTGGTACGCAGCCCCTTCGAGTACCCACAGTACTACCTGTCTGAGCCATG	19	0.00018	0
GAATGGCACAGAAGGCCCTAACTTCTACGTGCCCTTCTCCAATGCGATGGGAGTGGTACGCAGCCCCTTCGAGTACCCACAGTACTACCTGGCTGAGCCATG	19	0.00018	0
GAATGGCACAGAAGGCCCTAACTTCTACGTGCCCTTCTCCAATGCGATGGGTGTGGTACGCAGCCCCTTCGAGTGCCCACAGTACTACCTGGCTGAGCCATG	19	0.00018	0
GAATGGCACAGAAGGCCCTAACTTCTACGTGCCCTTCTCCAATGCGATGGGTGTGGTACGCAGCCCCTTCGAGTACCCACAATACTACCTGGCTGAGCCATG	19	0.00018	0
GAATGGCACAGAAGGCCCTAACTTCTACGTGCCCTTCTCCAATGCGATGGGTGTGGTACGCAGCCCCTTCGAGTACCCACAGTACTACCTGGCTGAGCCATG	19	0.00018	63C
GAATGGCACAGAAGGCCCTAACTTCTACGTGCCCTTCTCCAATACGATGGGTGTGGTACGCAGCCCCTTCGAGTACCCACAGTACTACCTGGCTGAGCCATG	19	0.00018	0
GAATGGCACAGAAGGCCCTAACTTCTACGTGCCCTTCTCCAATGCGATGGGTGTGGTACGCAGCCCCTTCGAGTACCCACAGTACTACCTGGCTGAGCCGTG	19	0.00018	0
GAATGGCACAGAAGGCTCTAACTTCTACGTGCCCTTCTCCAATGCGATGGGTGTGGTACGCAGCCCCTTCGAGTACCCACAGTACTACCTGGCTGAGCCATG	19	0.00018	0
GAATGGCACAGAAGGCCCTAACTTCTACGTGCCCTTATCCAATGCGATGGGTGTGGTACGCAGCCCCTTCGAGTACCCACAGTACTACCTGGCTGAGCCATG	19	0.00018	0
GAATGGCACAGAAGGCCCTAACTTCTACGTGCCCTTCTCC-ATGCGATGGGTGTGGTACGCAGCCCCTTCGAGTACCCACAGTACTACCTGGCTGAGCCATG	19	0.00018	0
GAATGGCACAGAAGGCCCTAAATTCTACGTGCCCTTCTCCAATGCGATGGGTGTGGTACGCAGCCCCTTCGAGTACCCACAGTACTACCTGGCTGAGCCATG	18	0.00017	0
GAATGGCACAGAAGGCCCTAACTTCTACGTGCCCTTCTCCAATGCGATGGGTGTGGTAAGCAGCCCCTTCGAGTACCCACAGTACTACCTGGCTGAGCCATG	18	0.00017	0
GAATGGCACAGAAGGCCCTAACTTCTACGTGCCCTTCTCCAATGCGATGGGTGTGGTACGCAGCCCCTTCGAGTACCAACAGTACTACCTGGCTGAGCCATG	18	0.00017	0
GAATGGCACAGAAGGCCCTAACTTCTACGTGCCCTTCTCCAATGCGATGGGTGTGGTACGCAGCCCCTTCGAGTACCCACAGTACTACCTGGCTGAGCAATG	18	0.00017	0
GAATGGCACAGAAGGCCCTAACTTCTACGTGCCCTTCTCCAATGCGATGGGTGGGGTACGCAGCCCCTTCGAGTACCCACAGTACTACCTGGCTGAGCCATG	18	0.00017	0
GAATGGCACAGAAGGCCCTAACTTCTACGTGACCTTCTCCAATGCGATGGGTGTGGTACGCAGCCCCTTCGAGTACCCACAGTACTACCTGGCTGAGCCATG	18	0.00017	0
GAATGGCACAGAAGGCCCTAGCTTCTACGTGCCCTTCTCCAATGCGATGGGTGTGGTACGCAGCCCCTTCGAGTACCCACAGTACTACCTGGCTGAGCCATG	18	0.00017	0
GAATGGCACAGAAGGCCCTAACTTCTACGTGCCCTTCTCCAATGCGATGGGTGTGGTACGCAGCCCCTTCGAGTACCCACAGTACTACCTGGCTGAGCCATG	18	0.00017	41ATGCG
GAATGGCACAGAAGGCCCTAACTTCTACGTGCCCTTCTACAATGCGATGGGTGTGGTACGCAGCCCCTTCGAGTACCCACAGTACTACCTGGCTGAGCCATG	17	0.00016	0
GAATGGCACAGAAGGCCCTAACTTCTACGTGCCCTTCTCCAATGCGATGGGTGTGGTACGCAGCCACTTCGAGTACCCACAGTACTACCTGGCTGAGCCATG	17	0.00016	0
GAATGGCACAGAAGGCCCTAACTTCTACGTGCCCTTCTCCAGTGCGATGGGTGTGGTACGCAGCCCCTTCGAGTACCCACAGTACTACCTGGCTGAGCCATG	17	0.00016	0
GAATGGCACAGAAGGCCCTAACTTCTACGTGCCCTTCTCCAA---GATGGGTGTGGTACGCAGCCCCTTCGAGTACCCACAGTACTACCTGGCTGAGCCATG	17	0.00016	0
GAATGGCACAGAAGGCCCTAACTTCTACGTGCCCTTCTCCAATGCGATGGGTGTGGTACGCAGCCCCTTCGAGTACCCACAGTACTACCTGGCTGATCCATG	17	0.00016	0
GAATGGCACAGAAGGCCCTAACTTCTACGTGCCCTTCTCCAATGCGATGGGTGTGGTACGCAGCCCCTTCGAGTACACACAGTACTACCTGGCTGAGCCATG	17	0.00016	0
GAATGGCACAGAAGGCCCTAACTTCTACGTGCCCTTCTCCAATGCGATGGGTGTGGTACGCATCCCCTTCGAGTACCCACAGTACTACCTGGCTGAGCCATG	17	0.00016	0
GAATGGCACAGAAGGCCCTAACTTCTAAGTGCCCTTCTCCAATGCGATGGGTGTGGTACGCAGCCCCTTCGAGTACCCACAGTACTACCTGGCTGAGCCATG	17	0.00016	0
GAATGGCACAGAAGGCCCTAACTTCTACGTGCCCTTCTCCAATGCGATGTGTGTGGTACGCAGCCCCTTCGAGTACCCACAGTACTACCTGGCTGAGCCATG	17	0.00016	0
GAATGGCAAAGAAGGCCCTAACTTCTACGTGCCCTTCTCCAATGCGATGGGTGTGGTACGCAGCCCCTTCGAGTACCCACAGTACTACCTGGCTGAGCCATG	17	0.00016	0
GAATGGCACAGAAGGCCTTAACTTCTACGTGCCCTTCTCCAATGCGATGGGTGTGGTACGCAGCCCCTTCGAGTACCCACAGTACTACCTGGCTGAGCCATG	17	0.00016	0
GAATGGCACAGAAGGCCCTAACTTCTACGTGCCCTTCTCCAATG-G--GGGTGTGGTACGCAGCCCCTTCGAGTACCCACAGTACTACCTGGCTGAGCCATG	17	0.00016	0
GAATGGCACAGAAGGCCCTAACTTCTACGTTCCCTTCTCCAATGCGATGGGTGTGGTACGCAGCCCCTTCGAGTACCCACAGTACTACCTGGCTGAGCCATG	17	0.00016	0
GAATGGCACAGAAGGCCCTAACTTCTACTTGCCCTTCTCCAATGCGATGGGTGTGGTACGCAGCCCCTTCGAGTACCCACAGTACTACCTGGCTGAGCCATG	17	0.00016	0
GAATGGCACAGAAGGCCCTAACTTCTACGTGCCCTTCTCCAATGCGATGGGTGTGGTACGCAGCCCCTTCGAGTACCCACAGTACTACCTGGCTGAGCCATG	17	0.00016	43GCGATG
GAATGGCACAGATGGCCCTAACTTCTACGTGCCCTTCTCCAATGCGATGGGTGTGGTACGCAGCCCCTTCGAGTACCCACAGTACTACCTGGCTGAGCCATG	16	0.00015	0
GAATGGCACAGAAGGCCCTAACTTCTACGTGCCCTTCTTCAATGCGATGGGTGTGGTACGCAGCCCCTTCGAGTACCCACAGTACTACCTGGCTGAGCCATG	16	0.00015	0
GAATGGCACAGAAGGCCCTAACTTCTACGTGCCCTTCTCCAATGCGATGGGTGTGGTACGCAGCCCCTTCGAGTACCCACAGTACTACCTGGCTGAGCCATG	16	0.00015	44CA
GAATGGCACAGAAGGCCCTAACTTCTACGTGCCCTTCTCCAATGCGATGGGTGTGGTACGCAGCCCCTTCGAGTACCCACAGTACTACCTGGCTGAGCCATG	16	0.00015	44CT
GAATGGCACAGAAGGCCCTAACTTCTACGTGCCCTTCTCCAATGCGATGGGTGTGGTACGCAGCCCCTTCGAGTACCCACAGTACTACCTGGC-GA-CCATG	16	0.00015	94GA
GAATGGCACAGAAGGCCCTAACTTCTACGTGCCCTTCTCCAATGCGATGGGTGTGTTACGCAGCCCCTTCGAGTACCCACAGTACTACCTGGCTGAGCCATG	16	0.00015	0
GAATGTCACAGAAGGCCCTAACTTCTACGTGCCCTTCTCCAATGCGATGGGTGTGGTACGCAGCCCCTTCGAGTACCCACAGTACTACCTGGCTGAGCCATG	16	0.00015	0
GAATGGCACAGAAGGCCCTAACTTCTACGTGCCCTTCTCCAATGCGATGGGTGTGGTACGCAGCCCCTTCGAGTACCCACAGCACTACCTGGCTGAGCCATG	16	0.00015	0
GAATGGCACAGAAGGCCCTAACTTCTACGTGCCCTTCTCCAATGCGATGGGTGTGGTACGCAGCCCCTTCGAGTACCCACAGTACTACCTGGCTGAGCCATG	16	0.00015	45GAT
GAATGGCACAGAAGGCCCTAACTTCTACGTGCCCTTCTCCAATGCGATGGGTGTGGTACGCAGCACCTTCGAGTACCCACAGTACTACCTGGCTGAGCCATG	16	0.00015	0
GAATGGCACAGAAGGCCCTAACTTCTACGTGCCCTTCTCCAATGCGATGGGTGTGGTACGCAGCCCCGTCGAGTACCCACAGTACTACCTGGCTGAGCCATG	16	0.00015	0
GAATGGCACAGAAGGCCCTAACTTCTACGTGCCTTTCTCCAATGCGATGGGTGTGGTACGCAGCCCCTTCGAGTACCCACAGTACTACCTGGCTGAGCCATG	15	0.00014	0
GAATGGCACAGAAGGCCCTAACTTCTACGTGCCCTTCTCCAATGCGATTGGTGTGGTACGCAGCCCCTTCGAGTACCCACAGTACTACCTGGCTGAGCCATG	15	0.00014	0
GAATGGCACAGAAGGCCCTAACTTCTACGTGCCCTTCTCCAATGCGATGGGTGTGGTACGCAGCCCCTTCGAGTACCCACAGTACTACCTAGCTGAGCCATG	15	0.00014	0
GAATGGCACAGAAGGCCCTAACTTCTACGTGCCCTTCTCCAATGCGATGGGTGTTGTACGCAGCCCCTTCGAGTACCCACAGTACTACCTGGCTGAGCCATG	15	0.00014	0
GAATGGCACAG-AGGCCC-AA-TT-TATGTGCCCTTCTCCAA--CGA--GGCGTGGT--GCAGCCCCTTCGAG--CCCGCAGTACTACCTGGC-GA-CCATG	15	0.00014	14GC22TT44TCAC59GG74AG94GA
GAATGGCACAGAAGGCCCTAACTTCTACGTGCCCTTCTCCAATGCGATGGGTGTGGTACGCAGCCCCTTCGAGTACCCACTGTACTACCTGGCTGAGCCATG	14	0.00013	0
GAATGGCACAGAAGGCCCTAACTTCTACGTGCCCTTCTCCAATGCGATGGGTGTGGTACGCAGCCCCTTCGTGTACCCACAGTACTACCTGGCTGAGCCATG	14	0.00013	0
GAATGGCACAGAAGGCCCTAACTTCTACGTGCCCTTCTCCAATGCGATGGGTGTGGTACGCAGCCCCTTCGAGTACCCACAGTACTACCTGGCTGAGCCATG	14	0.00013	47TGGGTGTG
GTATGGCACAGAAGGCCCTAACTTCTACGTGCCCTTCTCCAATGCGATGGGTGTGGTACGCAGCCCCTTCGAGTACCCACAGTACTACCTGGCTGAGCCATG	14	0.00013	0
GAATGGCACAGAAGGCCCTAACTTCTACGTGCCCTTCTCCA----GATGGGTGTGGTACGCAGCCCCTTCGAGTACCCACAGTACTACCTGGCTGAGCCATG	14	0.00013	0
GAATGGCACAGAAGGCCCTAACTTCTACGTGCCCTTCTCCAATGCGATGGTTGTGGTACGCAGCCCCTTCGAGTACCCACAGTACTACCTGGCTGAGCCATG	14	0.00013	0
GAATGGCACAGAAGGCCCTAACTTCTACGTGCCCTTTTCCAATGCGATGGGTGTGGTACGCAGCCCCTTCGAGTACCCACAGTACTACCTGGCTGAGCCATG	14	0.00013	0
GAATGGCACAGAAGGCCCTAACTTCTACGTGCCCATCTCCAATGCGATGGGTGTGGTACGCAGCCCCTTCGAGTACCCACAGTACTACCTGGCTGAGCCATG	14	0.00013	0
GAATGGCACAGAAGGCCCTAACTTCTACGTGCCCTTCTCCAATGCGATGGGTGTGGTACGCAGCCCCTTCGAGTACCCACAGTACTACCTGGATGAGCCATG	14	0.00013	0
GAATGGCACAGAAGGCCCTAACTTCTACGAGCCCTTCTCCAATGCGATGGGTGTGGTACGCAGCCCCTTCGAGTACCCACAGTACTACCTGGCTGAGCCATG	13	0.00013	0
#NAME?	13	0.00013	0
GAATGGCACAGAAGGCCCTAACTTCTACGTGCCCTTCTCCAATGCGATGGGTGTGGTACGCAGCCCCTTCGAGTATCCACAGTACTACCTGGCTGAGCCATG	13	0.00013	0
GAATGGCACAGAAGGCCCTAACTTCTACGTGCCCTTCTCCAATGCGATGGGTGTGGTACGCAGCCCCTTCGAGTACTCACAGTACTACCTGGCTGAGCCATG	13	0.00013	0
GAATGGCACAGCAGGCCCTAACTTCTACGTGCCCTTCTCCAATGCGATGGGTGTGGTACGCAGCCCCTTCGAGTACCCACAGTACTACCTGGCTGAGCCATG	13	0.00013	0
GAATGGAACAGAAGGCCCTAACTTCTACGTGCCCTTCTCCAATGCGATGGGTGTGGTACGCAGCCCCTTCGAGTACCCACAGTACTACCTGGCTGAGCCATG	13	0.00013	0
GAATGGCACAGAAGGCCCTAACTTCTACGTGCCCTTCTCCAATGCGATGGGTGTGGTACGCAGCCCCTTCGAGTACCCACAGTACTACCTGGCTGAGCCATG	13	0.00013	47TG
GAATGGCACAGAAGGCCCTAACTTCTACGTGCCCTTCTCCAATGCGATGAGTGTGGTACGCAGCCCCTTCGAGTACCCACAGTACTACCTGGCTGAGCCATG	13	0.00013	0
GAATGGCACAGAAGGCCCTAACTTCTACGTGCCCTTCTCCAATGCGATGGGTGTGGTACGCAGCCCCTTCGAGTA-CCACAGTACTACCTGGCTGAGCCATG	13	0.00013	0
GAATGGCACAGAAGGCCCTAACTTCTACGTGCCCTTCTCAAATGCGATGGGTGTGGTACGCAGCCCCTTCGAGTACCCACAGTACTACCTGGCTGAGCCATG	13	0.00013	0
GAATGGCACAGAAGGCCCTAACTTCTACGTGCCCTTCTCCAATGCGATGGGTGTGGTACGCAGCCCCTTCGAGTACCCACAGTACTACCTGGCTGAGCCATG	13	0.00013	42TG
GAATGGCACAGAAGGCCCTAACTTATACGTGCCCTTCTCCAATGCGATGGGTGTGGTACGCAGCCCCTTCGAGTACCCACAGTACTACCTGGCTGAGCCATG	13	0.00013	0
GAATGGCACAGAAGGCCCTAACTTCTACGTGCCCTTCTCCAAT---ATGGGTGTGGTACGCAGCCCCTTCGAGTACCCACAGTACTACCTGGCTGAGCCATG	13	0.00013	0
GAATGGCACAGAAGGCCCTAACTTCTACGTGCCC-TCTCCAATGCGATGGGTGTGGTACGCAGCCCCTTCGAGTACCCACAGTACTACCTGGCTGAGCCATG	13	0.00013	0
GAATGGCACAGAAGGCCCTAACTTCTACGTGCCCTTCTCC------ATGGGTGTGGTACGCAGCCCCTTCGAGTACCCACAGTACTACCTGGCTGAGCCATG	12	0.00012	0
GAATGGCACAGAAGGCCCTAACTTCTACGTGCCCTTCTCCAATGCGATGGGTGTGGTACGCAGCCTCTTCGAGTACCCACAGTACTACCTGGCTGAGCCATG	12	0.00012	0
GAATGGCACAGAAAGCCCTAACTTCTACGTGCCCTTCTCCAATGCGATGGGTGTGGTACGCAGCCCCTTCGAGTACCCACAGTACTACCTGGCTGAGCCATG	12	0.00012	0
GAATGGCACAGAAGGCCCTAACTTCTACGTGCCCTTCTCCAATGCGATGGGTGTGGTACGCAGCCCCTTCGAGTACCCACAGTACTACCTGGCTGAGCCATG	12	0.00012	44AA
GAATGGCACAGAAGGCCCTAACTTCTACGTGCCCTTCTCCAATGCGATGGGTGTGGTACGCAGCCCCTTCGAGTACCCACAGTACTACTTGGCTGAGCCATG	12	0.00012	0
GAATGGCACAGAAGGCCCTAACTTCTACGTGCCCTTCTCCAATGCGTTGGGTGTGGTACGCAGCCCCTTCGAGTACCCACAGTACTACCTGGCTGAGCCATG	12	0.00012	0
GAATGGCACTGAAGGCCCTAACTTCTACGTGCCCTTCTCCAATGCGATGGGTGTGGTACGCAGCCCCTTCGAGTACCCACAGTACTACCTGGCTGAGCCATG	12	0.00012	0
GAATGGCACAGAAGGCCCTAACTTCTACGTGCCCTTCTCCAATGCGATGGGTGTGGTACGCAGCCCCTTCGAGTACCCACAGTACTACCTGGCTTAGCCATG	12	0.00012	0
GAACGGCACAG-AGGCCC-AA-TT-TATGTGCCCTTCTCCAA--CGA--GGCGTGGT--GCAGCCCCTTCGAGTACCCACAGTACTACCTGGCTGAGCCATG	12	0.00012	14GC22TT44TCAC59GG
GAATGGCACAGAAGGCCCTAACTTCTACGTGCCCTTCTCC----CGATGGGTGTGGTACGCAGCCCCTTCGAGTACCCACAGTACTACCTGGCTGAGCCATG	11	0.00011	38C
GAATGGCACAGAAGGCCCTAACTTCTACGTGCCCTTCTCCAATGCGATGGGTGTGGTACGCAGCTCCTTCGAGTACCCACAGTACTACCTGGCTGAGCCATG	11	0.00011	0
GAATGGCACAGAAGGCCCTAACTTCTACGTGCTCTTCTCCAATGCGATGGGTGTGGTACGCAGCCCCTTCGAGTACCCACAGTACTACCTGGCTGAGCCATG	11	0.00011	0
GAATGGCACAGAAGGCCCTAACTTCTACGTGCCCTTCTCCAATGCGATAGGTGTGGTACGCAGCCCCTTCGAGTACCCACAGTACTACCTGGCTGAGCCATG	11	0.00011	0
GAATGGCACAGTAGGCCCTAACTTCTACGTGCCCTTCTCCAATGCGATGGGTGTGGTACGCAGCCCCTTCGAGTACCCACAGTACTACCTGGCTGAGCCATG	11	0.00011	0
GAATGGCACAGAAGGCCCTAACTTCTACGTGCCCTTCTCCAATGCGATGGGTGTGGTACGCAGCCCTTTCGAGTACCCACAGTACTACCTGGCTGAGCCATG	11	0.00011	0
GAATGGCACAGAAGGCCCTAACTTCTACGTGCCCTTCTCCAATGCGATGGGTGTGGTACGCAGCCCCTTCTAGTACCCACAGTACTACCTGGCTGAGCCATG	11	0.00011	0
GAATGGCACAGAAGGCCCTAACTTCTACGTGCCCGTCTCCAATGCGATGGGTGTGGTACGCAGCCCCTTCGAGTACCCACAGTACTACCTGGCTGAGCCATG	11	0.00011	0
GAATGGCACAGAAGGCCCTAACTCCTACGTGCCCTTCTCCAATGCGATGGGTGTGGTACGCAGCCCCTTCGAGTACCCACAGTACTACCTGGCTGAGCCATG	11	0.00011	0
GAATGGCACAGAAGGCCCTAACTTCTACGTGCCCTTCTCCAATGCGACGGGTGTGGTACGCAGCCCCTTCAAGTACCCACAGTACTACCTGGCTGAGCCATG	11	0.00011	0
GAATGGCACAGAAGGCCCTAACTTCTACGTGCCCTTCTCCAATGCGATGGGTGTGGTACGCAGCCCCTTCGAGTACCCACAGTACTACCTGGCTGAGCCTTG	11	0.00011	0
GAATGGCACAGAAGGCCCTAACTTCTACGTGCCCTTCTCCAATGCGATGGGTGTGGTACGCAGCCCCTTCGAGTACCCACAGTACTACCTGGCTGAGCCATG	11	0.00011	45GATG
GAATGGCACAGAAGGCCCTAATTTCTACGTGCCCTTCTCCAATGCGATGGGTGTGGTACGCAGCCCCTTCGAGTACCCACAGTACTACCTGGCTGAGCCATG	11	0.00011	0
GAATGGCACAGAAGGCCCTAACTTCTACGTGCCCTTCACCAATGCGATGGGTGTGGTACGCAGCCCCTTCGAGTACCCACAGTACTACCTGGCTGAGCCATG	11	0.00011	0
GAATGGCACAGAAGGCCCTAACTTCTACGTGCCCTTCTCCAATGCGATGGGTGTGGTACGCAGCCCCTTCGAGTACCCACAGTACTAACTGGCTGAGCCATG	11	0.00011	0
GAACGGCACAG-AGGCCC-AA-TT-TATGTGCCCTTCTCCAATGCGATGGGTGTGGTACGCAGCCCCTTCGAGTACCCACAGTACTACCTGGCTGAGCCATG	11	0.00011	14GC22TT
GAATGGCACAGAAGGCCCTAACTTCTACGTGCCCTTCTCC-AT-CGATGGGTGTGGTACGCAGCCCCTTCGAGTACCCACAGTACTACCTGGCTGAGCCATG	10	0.0001	0
GAATGGCACAGAAGGCCCTAACTTCTACGTGCCCTTCTCCAATGCGATGGGTGTGGTACGCAGCCCCTTCGAGTACCCACAGTACTACCTGGCTGAGCCATG	10	0.0001	44CC
GAATGGCACAGAAGGCCCTAACTTCTACGTGCCCTTCTCCAATGGG--GGGTGTGGTACGCAGCCCCTTCGAGTACCCACAGTACTACCTGGCTGAGCCATG	10	0.0001	0
GAATGGCACAGAAGGCCCTAACTTCTACGTGCCCTTCTCCAATGCGAT-GGTGTGGTACGCAGCCCCTTCGAGTACCCACAGTACTACCTGGCTGAGCCATG	10	0.0001	47C
GAATGGCACAGAAGGCCCTAACTTCTACGTGCCCTTCTCCA--GCGATGGGTGTGGTACGCAGCCCCTTCGAGTACCCACAGTACTACCTGGCTGAGCCATG	10	0.0001	0
GAATGGCACAGAAGGCCCTAACTTCTACGTGCCCTTCTCCAATGCGAT-GGTGTGGTACGCAGCCCCTTCGAGTACCCACAGTACTACCTGGCTGAGCCATG	10	0.0001	0
GAATGGCACAGAAGGCCCTAACTTCTACGTGCCCTTCTCCAATGCGATGGGTGTGGTACGCAGCCCCTTCGAGTACCCACAGTACTACCTGGCTGACCCATG	10	0.0001	0
GAATGGCCCAGAAGGCCCTAACTTCTACGTGCCCTTCTCCAATGCGATGGGTGTGGTACGCAGCCCCTTCGAGTACCCACAGTACTACCTGGCTGAGCCATG	10	0.0001	0
GAATGGCACAGAAGGCCCTAACTTCTACGTGCCCTTCTCCAATGCGATGGGTGTGGTACGCAGACCCTTCGAGTACCCACAGTACTACCTGGCTGAGCCATG	10	0.0001	0
GAATGGCACAGAAGGCCCTAACTTCTACGTGCCCTTCTCCAATGCGATGGGTGTGGTACGCAGCCCCTTCGAGTACCCGCAGTACTACCTGGCTGAGCCATG	9	9e-05	0
GAATGGCACAGAAGGCCCTAACTTCTACGTGCCCTTCTCCAATGCGACGGGTGTGGTACGCAGCCCCTTCGAGTACCCACAGTACTACCTGGCCGAGCCATG	9	9e-05	0
GAATGGCACAGAAGGCCCTAACTTCTACGTGCCCTTCTCCAATGCGACGGGTGTGGTACGCAGTCCCTTCGAGTACCCACAGTACTACCTGGCTGAGCCATG	9	9e-05	0
GAATGGCACAGAAGGCCCTAACTTCTACGTGCCCTTCTCCAATGCGATGGGTGTGGTACGCAGCCCCTTCGAGTACCCACATTACTACCTGGCTGAGCCATG	9	9e-05	0
GAATGGCACAGAAGGCCCTAACTTCTACGTGCCCTTC----------TGGGTGTGGTACGCAGCCCCTTCGAGTACCCACAGTACTACCTGGCTGAGCCATG	9	9e-05	0
GAATGGCACAGAAGGCCCTAACTTCTACGTGCCCTTCTCCAATGCGATGGGTGTGGTACGCAGCCCCTTCGAGTTCCCACAGTACTACCTGGCTGAGCCATG	9	9e-05	0
GAATGGCACAGAAGGCCCTAACTTCTACGTGCCCTTCTCCAATGCGATGGGTGAGGTACGCAGCCCCTTCGAGTACCCACAGTACTACCTGGCTGAGCCATG	9	9e-05	0
GAATGGCACAGAAGGCCCTAACTTCTACGTGCCCTTCTCCAA----ATGGGTGTGGTACGCAGCCCCTTCGAGTACCCACAGTACTACCTGGCTGAGCCATG	9	9e-05	0
GAATGGCACAGAAGGCCCTAACTTCTACGTGCCCTTCTCCAATGCGATGGGTGTGGTACGCAGCCCCTTCGAGTACCCACAGTACTACCTGGCTGAGCCATG	9	9e-05	42T
GAATGGCACAGAAGGCCCTAACTTCTACGTGCCCTTCTCCAA-------------GTACGCAGCCCCTTCGAGTACCCACAGTACTACCTGGCTGAGCCATG	9	9e-05	0
GAATGGCACAGAAGGCCCTAACTTCTACGTGCCCTTCTCCAATG-------------ACGCAGCCCCTTCGAGTACCCACAGTACTACCTGGCTGAGCCATG	9	9e-05	0
GAATGGCACAGAAGGCCCTAACTTCTACGTGCCCTTCTCCAATGCGATGGGTGTGGTACGCAGCCCCTTCGAGTACCCACCGTACTACCTGGCTGAGCCATG	9	9e-05	0
GAATGGCACAGAAGGCCCTAACTTCTACGTGCCCTTCTCCAATGCCATGGGTGTGGTACGCAGCCCCTTCGAGTACCCACAGTACTACCTGGCTGAGCCATG	9	9e-05	0
GAATGGCACAGAAGGCCCTAACTTCTACGTGCCCTTCTCCA---------GTGTGGTACGCAGCCCCTTCGAGTACCCACAGTACTACCTGGCTGAGCCATG	9	9e-05	0
GAATGGCACAGAAGGCCCTAACTTCTACGTGCCCTTCTCCAATGCGATGGGTGTGGTACGCAGCCCCTTCGAGTACCCACAGTACTACCAGGCTGAGCCATG	9	9e-05	0
GAATGACACAGAAGGCCCTAACTTCTACGTGCCCTTCTCCAATGCGACGGGTGTGGTACGCAGCCCCTTCGAGTACCCACAGTACTACCTGGCTGAGCCATG	9	9e-05	0
GAAAGGCACAGAAGGCCCTAACTTCTACGTGCCCTTCTCCAATGCGATGGGTGTGGTACGCAGCCCCTTCGAGTACCCACAGTACTACCTGGCTGAGCCATG	9	9e-05	0
GAATGGCACAGAAGGCCCTAACTTCTACGTGCCCTTCTCCATTGCGATGGGTGTGGTACGCAGCCCCTTCGAGTACCCACAGTACTACCTGGCTGAGCCATG	9	9e-05	0
GAATGGCTCAGAAGGCCCTAACTTCTACGTGCCCTTCTCCAATGCGATGGGTGTGGTACGCAGCCCCTTCGAGTACCCACAGTACTACCTGGCTGAGCCATG	9	9e-05	0
GAATGGCACAGAAGGCCCTAACTTCTACGTGCCCTTCTCCAATGCGATGGGTGTGGTACGCAGCCCCTTCGAGTACCCACAGTACTATCTGGCTGAGCCATG	9	9e-05	0
GAATGGCACAGAAGGCCCTAACTTCTACGTGCCCTTCTCCAATGCGCTGGGTGTGGTACGCAGCCCCTTCGAGTACCCACAGTACTACCTGGCTGAGCCATG	9	9e-05	0
GAATGGCACAGAAGGCCCTAACTTCTACGTGCCCTTCTCCAATGCGATGGGTGTGGTACGCAGCCCCTTCGAGTACCCACAGTACTACCTGGCTGAGCCATG	8	8e-05	44TA
GAATGGCACAGAAGGCCCTAACTTCTACGTGCCC----------CGATGGGTGTGGTACGCAGCCCCTTCGAGTACCCACAGTACTACCTGGCTGAGCCATG	8	8e-05	0
GAATGGCACAGAAGGCCCTAACTTCTACGTGCCCTTCTCCAATGCGATGGGTGTGGTACGCAGCCCCTTAGAGTACCCACAGTACTACCTGGCTGAGCCATG	8	8e-05	0
GAATGGCACAGAAGGCCCTAACTTCTACGTGCCCT------------TGGGTGTGGTACGCAGCCCCTTCGAGTACCCACAGTACTACCTGGCTGAGCCATG	8	8e-05	0
GAACGGCACAG-AGGCCC-AA-TT-TATGTGCCCTTCTCCAA--CGA--GGCGTGGT--GCAGCCCCTTCGAG--CCCGCAGTACTACCTGGCTGAGCCATG	8	8e-05	14GC22TT44TCAC59GG74AG
GAATGGCACAGAAGGCCCTAACTTCTACGTGCCCTTCTCCAATG----------GGTACGCAGCCCCTTCGAGTACCCACAGTACTACCTGGCTGAGCCATG	8	8e-05	0
GAACGGCACAG-AGGCCC-AA-TT-TATGTGCCCTTCTCCAA--CGA--GGCGTGGT--GCAGCCCCTTCGAG--CCCGCAGTACTACCTGGC-GA-CCATG	8	8e-05	13GC21TT43TCAC58GG73AG93GA
GAATGGCACAGAAGGCCCTAACTTCTACGTGCCCTTCTCCAATGCGATGGGTGTGGTACGCCGCCCCTTCGAGTACCCACAGTACTACCTGGCTGAGCCATG	8	8e-05	0
GAATGGCACAGAAGGCCCTAACTTCTACGTGCCCTTCTCCAATGC---GGGTGTGGTACGCAGCCCCTTCGAGTACCCACAGTACTACCTGGCTGAGCCATG	8	8e-05	0
GAATGGCACAGAAGGCCCTAACTTCTACGTGCCCT---------CGATGGGTGTGGTACGCAGCCCCTTCGAGTACCCACAGTACTACCTGGCTGAGCCATG	8	8e-05	0
GAATGGCACAGAAGGCCCTAACTTCTACGTGCCCTTCTCCAATGCGATGGGTGTGGTACGCAGCCCCTACGAGTACCCACAGTACTACCTGGCTGAGCCATG	8	8e-05	0
GAATGGCACAGAAGGCCCTAACTTCTACGTGCCCTTCTCCAATGCGATGGGTGTGGAACGCAGCCCCTTCGAGTACCCACAGTACTACCTGGCTGAGCCATG	8	8e-05	0
GAATGGCACAGAAGGCCCTAACTTCTACGTGCCCTTCTCCAATGCGATGGGTGTGGTACGCAGCCCCTTCGAGTACCCACAGTACTACCTGGCTGAGACATG	8	8e-05	0
GAATGGCACAGAAGGCCCTAACTTCTACGGGCCCTTCTCCAATGCGATGGGTGTGGTACGCAGCCCCTTCGAGTACCCACAGTACTACCTGGCTGAGCCATG	8	8e-05	0
GAATGGCACAGAAGGCCCTAACTTCTACGTGCCCTACTCCAATGCGATGGGTGTGGTACGCAGCCCCTTCGAGTACCCACAGTACTACCTGGCTGAGCCATG	8	8e-05	0
GAATGGCACAGAAGGCCCTAACTTCTACGTGCCCTTCTCCAATG--ATGGGTGTGGTACGCAGCCCCTTCGAGTACCCACAGTACTACCTGGCTGAGCCATG	8	8e-05	43A
GAATGCCACAGAAGGCCCTAACTTCTACGTGCCCTTCTCCAATGCGATGGGTGTGGTACGCAGCCCCTTCGAGTACCCACAGTACTACCTGGCTGAGCCATG	7	7e-05	0
GAATGGCACAGAAGGCCCTAACTTCTACGTGCCCTTCTCCAATGCGACGGGTGTGGTACGTAGCCCCTTCGAGTACCCACAGTACTACCTGGCTGAGCCATG	7	7e-05	0
GAATGGCACAGAAGGCCCTAACTTCTACGTGCCCTTCTCCAATGCGACGGGTGTGGTACGCAGCCCCTTCGAGTACCCACAGTACTACCTGGCTGAGCCACG	7	7e-05	0
GAATGGCACAGAAGGCCCTAACTTCTACGTGCCCTTCTCCAATGCGATGGGTGTGGTACGCAGCCCCTTCGAGTACCCACAGAACTACCTGGCTGAGCCATG	7	7e-05	0
GAATGGCACAGAAGGCCCTAACTTCTACGTGCCCTTCTCCAATGCGACGGGTGTGGTACGCACCCCCTTCGAGTACCCACAGTACTACCTGGCTGAGCCATG	7	7e-05	0
GAATGGCACAGAAGGCCCTAACTTCTACGTGCCCTTCTCCA-------GGGTGTGGTACGCAGCCCCTTCGAGTACCCACAGTACTACCTGGCTGAGCCATG	7	7e-05	0
GAATGGCACAGAAGGCCCTAACTTCTACGTGCCCTTCTCCAATGCGATGGGTGTGGTACGCAGCCCCTTCGAGTACCCACAGTACTACCTGGCTGAGCCATG	7	7e-05	43GG
GAATGGCACAGAAGGCCCTCACTTCTACGTGCCCTTCTCCAATGCGATGGGTGTGGTACGCAGCCCCTTCGAGTACCCACAGTACTACCTGGCTGAGCCATG	7	7e-05	0
GAATGGCACAGAAGGCCCTAACTTCTACGTGCCCTTCTCCAATG---------------GCAGCCCCTTCGAGTACCCACAGTACTACCTGGCTGAGCCATG	7	7e-05	0
GAATGGCACAGAAGGCCCTAACTTCTACGTGCCCTTCTCCAATGCGATGGGTGTGGTACGCAGCCCCTTCGAGTACCCACAGTACTACCTTGCTGAGCCATG	7	7e-05	0
GAATGGCACAGAAGGCCCTAACTTCTACGTGCCCTTCTCCAAT-------------------GCCCCTTCGAGTACCCACAGTACTACCTGGCTGAGCCATG	7	7e-05	0
CAATGGCACAGAAGGCCCTAACTTCTACGTGCCCTTCTCCAATGCGATGGGTGTGGTACGCAGCCCCTTCGAGTACCCACAGTACTACCTGGCTGAGCCATG	7	7e-05	0
GAATGGCACAGAAGGCCCAAACTTCTACGTGCCCTTCTCCAATGCGATGGGTGTGGTACGCAGCCCCTTCGAGTACCCACAGTACTACCTGGCTGAGCCATG	7	7e-05	0
GAATGGCACAGAAGGCCCTAACTTCTACGTGTCCTTCTCCAATGCGACGGGTGTGGTACGCAGCCCCTTCGAGTACCCACAGTACTACCTGGCTGAGCCATG	7	7e-05	0
GAATGGCACAGAAGGCCCTAACTTCTACGTGCCCTTCTCCAATGCGATGGGTGTGGTACGAAGCCCCTTCGAGTACCCACAGTACTACCTGGCTGAGCCATG	7	7e-05	0
GAATGGCACAGAAGGCCCTAACTTCTACGTGCCCTTCTCCAATGCGATGGGTGTGGTACGCAGCCCCTTCGAGTACCCACAGTACTCCCTGGCTGAGCCATG	7	7e-05	0
GAATGGCACAGAAGGCCCTAACTTCTACGTGCCCTTCTCCAAAGCGATGGGTGTGGTACGCAGCCCCTTCGAGTACCCACAGTACTACCTGGCTGAGCCATG	7	7e-05	0
GAATGGCACAGAAGGCCCTAACTTCTACGTGCCCTTCTCCAATGCGATGGGTGTGGTACGCAGCCCCTTCGAGTACCCACAGTAATACCTGGCTGAGCCATG	7	7e-05	0
GAATGGCACAGAAGGCCCTAACTTCTACGTGCCCTTCTCCAATGCGATGGGTGTGGTACGCAGCCCCTTCGAGTACCCACAGTACTACCTGGCTGAGCCATG	7	7e-05	40A
GAATGGCACAGAAGGCCCTAACTTCTACGTGCCCTTCTCCAATGCGATGGGTGTGGTACGCAGCCCCTTCGAGTACCCACAGTACTACCTGGCTGAGCCCTG	7	7e-05	0
GAATGGCACAGAAGGCCCTAACTTCTACGTGCCCTTCTCCAA--CGATGGGTGTGGTACGCAGCCCCTTCGAGTACCCACAGTACTACCTGGCTGAGCCATG	7	7e-05	40A
AAATGGCACAGAAGGCCCTAACTTCTACGTGCCCTTCTCCAATGCGACGGGTGTGGTACGCAGCCCCTTCGAGTACCCACAGTACTACCTGGCTGAGCCATG	7	7e-05	0
GAATGGCACAGAAGGCCCTAACTTCTACGTGCCCTTCTCCAATGCGATGGGTGTGGTACGCAGCCCCTTCGAGTACCCACAGTACTACCTGGCTGAGCCATG	6	6e-05	45GATGG
GAATGGCACAGAAGGCCCTAACTTCTACGTGCCCTTCTCCAATGC-------GTGGTACGCAGCCCCTTCGAGTACCCACAGTACTACCTGGCTGAGCCATG	6	6e-05	0
GAATGGCACAGAAGGCCCTAACTTCTACGTGCCCTTCTCCAA---------TGT-GTACGCAGCCCCTTCGAGTACCCACAGTACTACCTGGCTGAGCCATG	6	6e-05	0
GAATGGCACAGAAGGCCCTAACTTCTACGTGCCCTTCTCCAATGCGAAGGGTGTGGTACGCAGCCCCTTCGAGTACCCACAGTACTACCTGGCTGAGCCATG	6	6e-05	0
GAATGGCACAGAAGGCCCTAACTTTTACGTGCCCTTCTCCAATGCGATGGGTGTGGTACGCAGCCCCTTCGAGTACCCACAGTACTACCTGGCTGAGCCATG	6	6e-05	0
GAATGGCACAGAAGGCCCTAACTTCTACGTGCCCTTCTCCAATGCGATGGGTGTGGTACGCAGCCCCTTCGAG--CCCGCAGTACTACCTGGC-GA-CCATG	6	6e-05	74AG94GA
GAATGGCACAGAAGGCCCTAACTTCTACGTGCCCTTCTCCAATGCGATGGGTGTGGTACGCAGCCCCTTCGAGTACCCACAGTACTACCTGGCTGCGCCATG	6	6e-05	0
GAATGGCACAGAAGGCCCTAACTTCTATGTGCCCTTCTCCAATGCGACGGGTGTGGTACGCAGCCCCTTCGAGTACCCACAGTACTACCTGGCTGAGCCATG	6	6e-05	0
GAATGGCACAGAAGGCCCTAACTTCTACGTGCCCTTCTCCAATGCGATGGGTGTGGTACGCAGCCCCTTCGAGTACCCACAGTACTACCTGGCTGAGCCAAG	6	6e-05	0
GAATGGCACAGAAGGCCCTAACTTCTACGTGCCCTTCTCCAATGCGATGGGTGTGGTACGCAGCCCCTTCGAGTACCCACAGTACTACCTGGCTGAGCCATG	6	6e-05	48G
GAATGGCACAGAAGGCCCTAACTTCTACGTGCCCTTCTCCAATGCGACGGGCGTGGTACGCAGCCCCTTCGAGTACCCACAGTACTACCTGGCTGAGCCATG	6	6e-05	0
GAATGGCACAGAAGGCCCTAACTTCTACGTGCCCTTCTCCAATGCGATGGGTGTGGTACGCAGCCCCTTCGAGTACCCACAGTACTACCTGGCTGAGCCATG	6	6e-05	50GT
GAATGGCACAGAAGGCCCTAACTTCTACGTGCCCTTCTCCAATGCGATGGGTGTGGTACGCAGCCCCTTCGAGTACCCACAGTACTACCTGGCTGAGCCATG	6	6e-05	45G
GAATGGCACAGAAGGCCCTAACTTCTACGTGCCCTCCTCCAATGCGACGGGTGTGGTACGCAGCCCCTTCGAGTACCCACAGTACTACCTGGCTGAGCCATG	6	6e-05	0
GAATGGCACAGAAGGCCCTAACTTCTACGTGCCCTTCTCCAATGCGATGGGTGTGGT--GCAGCCCCTTCGAG--CCCGCAGTACTACCTGGC-GA-CCATG	6	6e-05	59GG74AG94GA
GAATGGCACAGAAGGCCCTAACTTCTACGTGCCCTTCTCCAA--------------TACGCAGCCCCTTCGAGTACCCACAGTACTACCTGGCTGAGCCATG	6	6e-05	0
GAATGGCACAGAAGGCCCTAACTTCTACGTGCCCTTCTCCAATGCGACGGGTGTGGTACGCAGCCCCCTCGAGTACCCACAGTACTACCTGGCTGAGCCATG	6	6e-05	0
GAATGGCACAGAAGGCCCTAACTTCTACGTGCCCTTCTCCAATGCGATGGGTGTGGTACGCAGCCCCTTCGAGTACCCACAGTACTACCTGGCTGAGCCATG	6	6e-05	44GA
GAACGGCACAGAGGGCCCTAACTTCTACGTGCCCTTCTCCAATGCGATGGGTGTGGTACGCAGCCCCTTCGAGTACCCACAGTACTACCTGGCTGAGCCATG	6	6e-05	0
GAATGGCACAGAAGGCCCTAACTTCTACGTGCCCTTCTCCAATGCGATGGGTGTGGTACGCAGCCCCTTCGAGTACCCACAGTACTTCCTGGCTGAGCCATG	6	6e-05	0
GAATGGCACAGAAGGCCCTAACTTCTACGTGCCCTTCTCC---GCGATGGGTGTGGTACGCAGCCCCTTCGAGTACCCACAGTACTACCTGGCTGAGCCATG	6	6e-05	0
GAATGGCACAGAAGGCCCTAACTTCTACGTGGCCTTCTCCAATGCGATGGGTGTGGTACGCAGCCCCTTCGAGTACCCACAGTACTACCTGGCTGAGCCATG	6	6e-05	0
GAATGGCACAGAAGGCCCTAACTTCTA-----------------CGATGGGTGTGGTACGCAGCCCCTTCGAGTACCCACAGTACTACCTGGCTGAGCCATG	6	6e-05	0
GAATGGCACAGAAGGCCCTAACTTCTACGTGCCCTTCTCCAATGCGATGGGTGTGGTACGCAG-CCCTTCGAGTACCCACAGTACTACCTGGCTGAGCCATG	6	6e-05	0
GAATGGCACAGAAGGCCCTAACTACTACGTGCCCTTCTCCAATGCGATGGGTGTGGTACGCAGCCCCTTCGAGTACCCACAGTACTACCTGGCTGAGCCATG	6	6e-05	0
GAATGGCACAGAAGGCCCTAACTTCTACGTGCCCTTCTCCA---CGATGGGTGTGGTACGCAGCCCCTTCGAGTACCCACAGTACTACCTGGCTGAGCCATG	6	6e-05	38C
GAATGGCACAGAAGGCCCTAACTTCTACGTGCCCTTCTCCAATGC--TGGGTGTGGTACGCAGCCCCTTCGAGTACCCACAGTACTACCTGGCTGAGCCATG	6	6e-05	46AC
GAATGGCACAGAAGGCCCTAACTTCTACGTGCCCTTCTCC---GCGATGGGTGTGGTACGCAGCCCCTTCGAGTACCCACAGTACTACCTGGCTGAGCCATG	6	6e-05	38C
GAATGGCACAGAAGGCCCTACCTTCTACGTGCCCTTCTCCAATGCGATGGGTGTGGTACGCAGCCCCTTCGAGTACCCACAGTACTACCTGGCTGAGCCATG	6	6e-05	0
GAATGGCACAGAAGGCCCTAACTTCTACGTGCCCTTCTCCAA---GATGGGTGTGGTACGCAGCCCCTTCGAGTACCCACAGTACTACCTGGCTGAGCCATG	6	6e-05	40A
GAATGGCACAGAAGGCCCTAACTTCTACGTGCCTTTCTCCAATGCGACGGGTGTGGTACGCAGCCCCTTCGAGTACCCACAGTACTACCTGGCTGAGCCATG	5	5e-05	0
GAATGGCACAGAAGGCCCTAACTTCTACGTGCCCTTCTCCAA---------TGT--TACGCAGCCCCTTCGAGTACCCACAGTACTACCTGGCTGAGCCATG	5	5e-05	0
#NAME?	5	5e-05	0
GAATGGCACAGAAGGCCCTAACTTCTACGTGCCCTTCTCCAATG--------------------------GAGTACCCACAGTACTACCTGGCTGAGCCATG	5	5e-05	0
GAATGGCACAGAAGGCCCTAACTTCTACGTGCCCTTCTCCAATGCGATGGGTGTGGTACGCAGCCCCTTCGAGTACCCACAGTACTACCTGGCGGAGCCATG	5	5e-05	0
GAATGGCACAGAAGGCCCTAACTTCTACGTGCCCT----------GATGGGTGTGGTACGCAGCCCCTTCGAGTACCCACAGTACTACCTGGCTGAGCCATG	5	5e-05	0
GAATGGCACAGAAGGCCCTAACTTCTACGTGCCCTTCTCCAAT-CGATGGGTGTGGTACACAGCCCCTTCGAGTACCCACAGTACTACCTGGCTGAGCCATG	5	5e-05	0
GAATGGCACAGAAGGCCCTAACTTCTACGTGCCCTTCTCCAAT-CGATGGGCGTGGTACGCAGCCCCTTCGAGTACCCACAGTACTACCTGGCTGAGCCATG	5	5e-05	0
GAATGGCACAGAAGGCCCTAACTTCTACGTGCCCTTCTCCAATGCGATGGGTGTGGTACGCAGCCCCTTCGAGTACCCACAGTACTACCTGGCTGAGCCATG	5	5e-05	35GG38CGCCCGGC49AGTGAGCGAGCGAGCGCG69GAGAGGG77G80GCCAA
GAATGGCACAGAAGGCCC------CTACGTGCCCTTCTCCAATGCGATGGGTGTGGTACGCAGCCCCTTCGAGTACCCACAGTACTACCTGGCTGAGCCATG	5	5e-05	0
GAATGGCACAGAAGGCCCTAACTTCTACGTGCCCTTCTCCAATGCGATGGGTGTGGTACGCAGCCCCTTCGAGTACCCACAGTACTACCTGGCTGAGCCATG	5	5e-05	48GG
GAATGGCACAGAAGGCCCTAACTTCTAC----------------CGATGGGTGTGGTACGCAGCCCCTTCGAGTACCCACAGTACTACCTGGCTGAGCCATG	5	5e-05	0
GAATGGCACAGAAGGCCCTAACTTCTACGTGCCCTTCT-CAA--CGATGGGTGTGGTACGCAGCCCCTTCGAGTACCCACAGTACTACCTGGCTGAGCCATG	5	5e-05	0
GAATGGCACAGAAGGCCCTAACTTCTACGTGCCCTTCTCCAAT-----------------------------GTACCCACAGTACTACCTGGCTGAGCCATG	5	5e-05	0
GAATGGCACAGAAGGCCCTAACTTCTACGTGCCC------------ATGGGTGTGGTACGCAGCCCCTTCGAGTACCCACAGTACTACCTGGCTGAGCCATG	5	5e-05	0
GAATGGCACAGAAGGCCCTAACTTCTACGTGCCCTTCTCCAATGCGATGGGTGTGGTACGCAGCCCCTTCGAGTACCCACAGTACTACCTGGCTGAGCCATG	5	5e-05	44GTCGCCCGGCCTCAGTGAGCGAGCGAGCGCGCAGAGAGGGAGTGGCCAA
GAATGGCACAGAAGGCCCTAACTTCTACGTGCCCTTCTCCAA------GGGTGTGGTACGCAGCCCCTTCGAGTACCCACAGTACTACCTGGCTGAGCCATG	5	5e-05	0
GAATGGCACAGAAGGCCCTAACTTCTACGTGCCCTTCTCCAATGCGATGGGTGTGCTACGCAGCCCCTTCGAGTACCCACAGTACTACCTGGCTGAGCCATG	5	5e-05	0
GAATGGCACAGAAGGCCCTAACTTCTACGTGCCCTTCTCCAATGCGATGGGTGTGGTTCGCAGCCCCTTCGAGTACCCACAGTACTACCTGGCTGAGCCATG	5	5e-05	0
GAATGGCACAGAAGGCCCTAACTTCTACGTGCCCTTCTCCAAT--GATGGGTGTGGTACGCAGCCCCTTCGAGTACCCACAGTACTACCTGGCTGAGCCATG	5	5e-05	44T
GAATGGCACAGAAGGCCCTAACTTCTACGTGCCCTTCTCCAATGCGATGGGTGTGGTACGCAGCCCCTTCGAGTACCCAAAGTACTACCTGGCTGAGCCATG	5	5e-05	0
GAACGGCACAGAAGGCCCTAACTTCTACGTGCCCTTCTCCAATGCGACGGGTGTGGTACGCAGCCCCTTCGAGTACCCACAGTACTACCTGGCTGAGCCATG	5	5e-05	0
GAATGGCACAGAAGGCCCTAACTTCTACGTGCCCTTCTCCAATGCGATGGGTGTGGTACGCAGCCCCTTCGAGTACCCACAGTACTACCTGGCTGAGCCATG	5	5e-05	44GC
GAATGGCACAGAAGGCCCTAACTTCTACGTGCCCTTCTCCAATGCG-TGGGTGTGGTACGCAGCCCCTTCGAGTACCCACAGTACTACCTGGCTGAGCCATG	5	5e-05	0
GATTGGCACAGAAGGCCCTAACTTCTACGTGCCCTTCTCCAATGCGATGGGTGTGGTACGCAGCCCCTTCGAGTACCCACAGTACTACCTGGCTGAGCCATG	5	5e-05	0
GAATGGCACAGAAGGCCCTAACTTCTACGTGCCCTTCTCCAATGCGACGGGTGTGGTACGCAGCCCCTTCGAGTACCCACAGTACTACCTGGCTGAGTCATG	5	5e-05	0
GAACGGCACAG-AGGCCC-AA-TTTTATGTGCCCTTCTCCAA--CGA--GGCGTGGT--GCAGCCCCTTCGAG--CCCGCAGTACTACCTGGC-GA-CCATG	5	5e-05	14GC43TCAC58GG73AG93GA
GAATGGCACAGAAGGCCCTAACTTCTACGTGCCCTTC-------C-ATGGGTGTGGTACGCAGCCCCTTCGAGTACCCACAGTACTACCTGGCTGAGCCATG	5	5e-05	31C
GAATGGCACAGAAGGCCCTAACTTCTACGTGCCCTTCTCCAAT---ATGGGTGTGGTACGCAGCCCCTTCGAGTACCCACAGTACTACCTGGCTGAGCCATG	5	5e-05	42T
GAATGGCACAGAAGGCCCTAACTTCTACGTGCCCTTCTCCAATGCGATGGGTGTGGTACGCAGCCCCTTCGAGTACCCACAGTACTACCTGGCTCAGCCATG	5	5e-05	0
GAATGGCACAGAAGGCCCTAACTTCTACGTGCCCTTCTCCA--------------GTACGCAGCCCCTTCGAGTACCCACAGTACTACCTGGCTGAGCCATG	5	5e-05	0
GAATGGCACAGAAGGCCCTAACTTCTACGTGCCCTTCTCCTATGCGATGGGTGTGGTACGCAGCCCCTTCGAGTACCCACAGTACTACCTGGCTGAGCCATG	5	5e-05	0
GAATGGCACAGAAGGCCCTAACTTCTACGTGCCCTTCTCCAATG-GATGGGTGTGGTACGCAGCCCCTTCGAGTACCCACAGTACTACCTGGCTGAGCCATG	5	5e-05	43GG
GAATGGCACAGAAGGCCCTAACTTCTACGTGCCCT------------------TGGTACGCAGCCCCTTCGAGTACCCACAGTACTACCTGGCTGAGCCATG	5	5e-05	0
GAATGGCACAGAAGGCCCTAACTTCTACGTGCCCTTCTCCAATG-GATGGGTGTGGTACGCAGCCCCTTCGAGTACCCACGGTACTACCTGGCTGAGCCATG	5	5e-05	0
GAATGGCACAGAAGGCCCTAACTTCTACGTGCCCTTCTCCAATGCGACGGGTGTGGTACGCAGCCCCTTCGAGTACCCACAGTACTACCTGGCTGGGCCATG	4	4e-05	0
GAATGGCACAGAAGGCCCTAACTTCTACGTGCCCTTCTCC------------------CGCAGCCCCTTCGAGTACCCACAGTACTACCTGGCTGAGCCATG	4	4e-05	0
GAATGGCACAGAAGGCCCTAACTTCTACGTGCCCTTCTCCAATGCGATGGGTGTGGTACGCAGCCCCTTCGAGTACCCACAGTACTACCTGGCTGAGCGATG	4	4e-05	0
GAATGGCACAGAAGGCCCTAACTTCTACGTGCCCTTCTCCAAT-CGATGGGTGTGGTACGCGGCCCCTTCGAGTACCCACAGTACTACCTGGCTGAGCCATG	4	4e-05	0
GAATGGCACAGAAGGCCCTAACTTCTACGTGCCCTTCTCCAATGCGATGGGTGTGGTACGCAGCCCCTTCGAGTACCCACAGTACTACCTGGCTGAGCCATG	4	4e-05	42G
GAATGGCACAGAAGGCCCTAACTTCTACGTGCCCTTC------GCGATGGGTGTGGTACGCAGCCCCTTCGAGTACCCACAGTACTACCTGGCTGAGCCATG	4	4e-05	0
GAATGGCACAGAAGGCCCTAACTTCTACGTGCCCTTCTCCAATGCGATGGGTGTCGTACGCAGCCCCTTCGAGTACCCACAGTACTACCTGGCTGAGCCATG	4	4e-05	0
GAATGGCACAGAAGGCCCTAACTTCTACGTGCCCTTCTCCAAT-------------------GCCCCATCGAGTACCCACAGTACTACCTGGCTGAGCCATG	4	4e-05	0
GAATGGCACAGAAGGCCCTAACTTCGACGTGCCCTTCTCCAATGCGATGGGTGTGGTACGCAGCCCCTTCGAGTACCCACAGTACTACCTGGCTGAGCCATG	4	4e-05	0
GAATGACACAGAAGGCCCTAACTTCTACGTGCCCTTCTCCAAT-CGATGGGTGTGGTACGCAGCCCCTTCGAGTACCCACAGTACTACCTGGCTGAGCCATG	4	4e-05	0
GAACGGCACAG-AGGCCC-AA-TT-TATGTGCCCTTCTCCAATGC-A--GGCGTGGT--GCAGCCCCTTCGAG--CCCGCAGTACTACCTGGC-GA-CCATG	4	4e-05	14GC22TT42CG45C59GG74AG94GA
GAATGGCACAGAAGGCCCTAACTTCTACGTGCCCTTCTCCAATGCGATGGGTGTGGTACGCAGCCCCTTCGACTACCCACAGTACTACCTGGCTGAGCCATG	4	4e-05	0
GACTGGCACAGAAGGCCCTAACTTCTACGTGCCCTTCTCCAAT-CGATGGGTGTGGTACGCAGCCCCTTCGAGTACCCACAGTACTACCTGGCTGAGCCATG	4	4e-05	0
GAATGGCACAGAAGGCCCTAACTTCTACGTGCCCTTC------------------GTACGCAGCCCCTTCGAGTACCCACAGTACTACCTGGCTGAGCCATG	4	4e-05	0
GAATGGCACAGAAGGCCCTAACTTCTTCGTGCCCTTCTCCAATGCGATGGGTGTGGTACGCAGCCCCTTCGAGTACCCACAGTACTACCTGGCTGAGCCATG	4	4e-05	0
GAATGGCACAGAAGGCCCTAACTTCTACGTGCCCTTCTCCAATGCGATGGGTGTGGTACGCAGCCCCTTCGAGTACCCACAGTCCTACCTGGCTGAGCCATG	4	4e-05	0
GAATGGCACAGAAGGCCCTAACTTCTACGTGCCCTTCTCCAATGCGATGGGTGTGGTACGCAGCCCCTTCGAGTACCCACAGTACTACCTGGCTGAGCCATC	4	4e-05	0
GAATGGCACAGAAGGCCCTAACTTCTACGTGCCCTTCTCCAATGCGACGGGTGTGGTACGCAACCCCTTCGAGTACCCACAGTACTACCTGGCTGAGCCATG	4	4e-05	0
GAATGGCACAGAAGGCCCTAACTTCTACGTGCCCTTCTCCAATGCGATGGGTGTGGTACGCAGCCCCTTCGAGTACCCACAGTACTACCTCGCTGAGCCATG	4	4e-05	0
GAATGGCACAGAAGGCCCTAACTTCTACGTGCCCTTCTCCAATG-GATGGGTGTGGTACGCAGCCCCTTCGAGTACCCACAGTACTACCTGGCTGAGCCATG	4	4e-05	43GGGG
GAATGGCACAGAAGG-CCTAACTTCTACGTGCCCTTCTCCAATGCGATGGGTGTGGTACGCAGCCCCTTCGAGTACCCACAGTACTACCTGGCTGAGCCATG	4	4e-05	0
GAATGGCACAG-AGGCCCTAACTTCTACGTGCCCTTCTCCAATGCGATGGGTGTGGTACGCAGCCCCTTCGAGTACCCACAGTACTACCTGGCTGAGCCATG	4	4e-05	0
GAATGGCACAGAAGGCCCTAACTTCTACGTGCCCTTCTCCAATGC-ATGGGTGTGGTACGCAGCCCCTTCGAGTACCCACAGTACTACCTGGCTGAGCCATG	4	4e-05	44TTGGC51CTCCCTCTC62CGC66CTC70C72C74CTCAC81AGGCCGCCCGGGCA
GAATGGCACAGAAGGCCCTAACTTCTACGTGCCCTTCTCCAATGCGATGGGTGTGGTACGCAGCCCCTTCGAGTACCCACAGTACCACCTGGCTGAGCCATG	4	4e-05	43G
GAATGGCACAGAAGGCCCTAACTTCTACGTG-CCTT--------CGATGGGTGTGGTACGCAGCCCCTTCGAGTACCCACAGTACTACCTGGCTGAGCCATG	4	4e-05	0
GAATGGCACAGAAGGCCCTAACTTCTACGTGCCCTTCTCCAATGTGACGGGTGTGGTACGCAGCCCCTTCGAGTACCCACAGTACTACCTGGCTGAGCCATG	4	4e-05	0
GAATGGCACAGAAGGCCCTAACTTCTACGTGCCCTTCTCCAATGCGACGGGTGTAGTACGCAGCCCCTTCGAGTACCCACAGTACTACCTGGCTGAGCCATG	4	4e-05	0
GAATGGCACAGAAGGCCCTATCTTCTACGTGCCCTTCTCCAATGCGATGGGTGTGGTACGCAGCCCCTTCGAGTACCCACAGTACTACCTGGCTGAGCCATG	4	4e-05	0
GAATGGTACAGAAGGCCCTAACTTCTACGTGCCCTTCTCCAATGCGACGGGTGTGGTACGCAGCCCCTTCGAGTACCCACAGTACTACCTGGCTGAGCCATG	4	4e-05	0
GAATGGCACAGAAGGCCCTAACTTCTACGTGCCCTTCTCC--------GGGTGTGGTACGCAGCCCCTTCGAGTACCCACAGTACTACCTGGCTGAGCCATG	4	4e-05	0
GAATGGCACAGAAGGCCCTAACTTCTACGTGCCCTTCTCCAATGCGACGGGGGTGGTACGCAGCCCCTTCGAGTACCCACAGTACTACCTGGCTGAGCCATG	4	4e-05	0
GAATGGCACAGAAGGCC---------------------CC---GCGATGGGTGTGGTACGCAGCCCCTTCGAGTACCCACAGTACTACCTGGCTGAGCCATG	4	4e-05	0
GAATGGCACAGAAGGCCCTAACTTCTACGTGCCCTT--------------GTGTGGTACGCAGCCCCTTCGAGTACCCACAGTACTACCTGGCTGAGCCATG	4	4e-05	0
GAATGGCACAGAAGGCCCTAACTTCTACGTGCCCTTCTCCAAT----TGGGTGTGGTACGCAGCCCCTTCGAGTACCCACAGTACTACCTGGCTGAGCCATG	4	4e-05	0
GAATGGCACAGAAGGCCCTAACTTCTACGTGCCCTTCTCCAATGCGATGGGTGTGGTACGCAGCCCCTTCGAGTACCCACAGTACTACCTGGCTGAGCCATG	4	4e-05	44ACATTGTATTACTTGGTAAATTTAGC
GAATGGCACAGAAGGCCCTAACTTCTACGTGCCCTTCTCCAATG---T---TGTGGTACGCAGCCCCTTCGAGTACCCACAGTACTACCTGGCTGAGCCATG	4	4e-05	0
GAATGGCACAGAAGGCCCTAACTTCTACGTGCCCTTCTCCAATGCGACGGGTGCGGTACGCAGCCCCTTCGAGTACCCACAGTACTACCTGGCTGAGCCATG	4	4e-05	0
GAATGGTACAGAAGGCCCTAACTTCTACGTGCCCTTCTCCAATG-GATGGGTGTGGTACGCAGCCCCTTCGAGTACCCACAGTACTACCTGGCTGAGCCATG	4	4e-05	0
GAATGGCACAGAAGGCCCTAACTTCTACGTGCCCTTCTCCAATGCGATGGGTGTGGTACGCAGCCCCTTCGAGTACCCACAGTACTACCTGGCTGAGCCATG	4	4e-05	31CC
GAATGGCACAGAAGGCCCTAACTTCTACGTGCCCTTCTCCAATGCGACGGGTGTGGTACGCGGCCCCTTCGAGTACCCACAGTACTACCTGGCTGAGCCATG	4	4e-05	0
GAATGGCACAGAAGGCCCTAACTTCTACGTGCCCTTCTCCAATGCGATGGGTGTGGTACGCAGCCCCTTCGAGTACCCACAGTACTACCTGGCTGAGCCAGG	4	4e-05	0
GAATGGCACCGAAGGCCCTAACTTCTACGTGCCCTTCTCCAATGCGATGGGTGTGGTACGCAGCCCCTTCGAGTACCCACAGTACTACCTGGCTGAGCCATG	4	4e-05	0
GAACGGCACAG-AGGCCC-AA-TT-TATGTGCCCTTCTCCAA--CGATGGG--TGGT--GCAGCCCCTTCGAG--CCCGCAGTACTACCTGGC-GA-CCATG	4	4e-05	14GC22TT44TC48A51C59GG74AG94GA
GAATGGCACAGAAGGCACTAACTTCTACGTGCCCTTCTCCAATGCGACGGGTGTGGTACGCAGCCCCTTCGAGTACCCACAGTACTACCTGGCTGAGCCATG	4	4e-05	0
#NAME?	4	4e-05	0
GAATGGCACAGAAGGCCCTAACTTCTACGTGCCCTTCCCCAAT-CGATGGGTGTGGTACGCAGCCCCTTCGAGTACCCACAGTACTACCTGGCTGAGCCATG	4	4e-05	0
GAATGGCACAGAAGGCCCTAACTTCTACGTGCCCT---------------------TACGCAGCCCCTTCGAGTACCCACAGTACTACCTGGCTGAGCCATG	4	4e-05	0
GAATGGCACAGAAGGCCCTAACTTCTACGTGCCCTTCTCCAATGCGATGGGTGTGGTACGCAGCCCCTTCGAGTACCCACAGTACAACCTGGCTGAGCCATG	4	4e-05	0
GAATGGCACAGAAGGCCCTAACTTCTACGTGCCCTTCTCCAATGCGACGGGTGTGGTACGCAGCCTCTTCGAGTACCCACAGTACTACCTGGCTGAGCCATG	4	4e-05	0
GAATGGCACAGAAGGCCCTAACTTCTACGTGCCCTTCTCCA---------------TACGCAGCCCCTTCGAGTACCCACAGTACTACCTGGCTGAGCCATG	4	4e-05	0
GAATGGCACAGAAGGCCCTAACTTCTACGTGCCCTTCTCCAATGCGAGGGGTGTGGTACGCAGCCCCTTCGAGTACCCACAGTACTACCTGGCTGAGCCATG	4	4e-05	0
GAATGGCACAGAAGGCCCTAACTTCAACGTGCCCTTCTCCAATGCGATGGGTGTGGTACGCAGCCCCTTCGAGTACCCACAGTACTACCTGGCTGAGCCATG	4	4e-05	0
GAATGGCACAGAAGGCCCTAACTTCTACGTGCCCTTCTCCAATGCGACGGGTGTGGTACGCAGCCCCTTCGAGTACCCACAGTACTACTTGGCTGAGCCATG	4	4e-05	0
GAACGGCACAG-AGGCCC-AA-TT-TATGTGCCCTTCTCCAA--CGATGG---TGGT--GCAGCCCCTTCGAG--CCCGCAGTACTACCTGGC-GA-CCATG	4	4e-05	14GC22TT44TCAC51C59GG74AG94GA
GAATGGCACAGAAGGCCCTAACTTCTACGTGCCCTTCTCCAAT--GAGGGGTGTGGTACGCAGCCCCTTCGAGTACCCACAGTACTACCTGGCTGAGCCATG	4	4e-05	0
GAATGGCACAGAAGGCCCTAACTTCTACGTGCCCTTCTCCAATGCGATGGGTGTGGTACGCAGCCCCTTCGAGTACCCACAGTACTACCTGGCTGAGCCATG	4	4e-05	67T
GAATGGCACAGAAGGCCCTAACTTCTACGTGCCCTTCTCCAATGCGATGGGTGTGGTACGCAGCCCCTTCGAGTACCCACAGTACTACCTGGCTGAGCCATG	4	4e-05	47TGGG
GAATGGCACAGAAGGCCCTAACTTCTACGTGCCCTTCTCCAA----------GTGGTACGCAGCCCCTTCGAGTACCCACAGTACTACCTGGCTGAGCCATG	4	4e-05	0
GAATGGCACAGAAGGCCCTAACTTCTACGTGCCCTTCTCCAAT----TGGGTGTGGTACGCAGCCCCTTCGAGTACCCACAGTACTACCTGGCTGAGCCATG	4	4e-05	42T
GAATGGCACAGAAGGCCCTAACTTCTACGTGCCCTTCTCCAAT--GA-GGGTGTGGTACGCAGCCCCTTCGAGTACCCACAGTACTACCTGGCTGAGCCATG	4	4e-05	0
GAATGGCACAGAAGGCCCTAACTTCTACGTGCCCTT-----A---GATGGGTGTGGTACGCAGCCCCTTCGAGTACCCACAGTACTACCTGGCTGAGCCATG	4	4e-05	0
GAATGGCACAGAAGGCCCTAACTTCTACGTGCCCTTCTCCAATGCGATGGGTGTGGTACCCAGCCCCTTCGAGTACCCACAGTACTACCTGGCTGAGCCATG	4	4e-05	0
GAATGGCACAGAAGGCCCTAACTTCTACGTCCCCTTCTCCAATGCGATGGGTGTGGTACGCAGCCCCTTCGAGTACCCACAGTACTACCTGGCTGAGCCATG	4	4e-05	0
GAATGGCACAGAAGGCCCTAACTTCTACGTGCCCTTCTCCCATGCGATGGGTGTGGTACGCAGCCCCTTCGAGTACCCACAGTACTACCTGGCTGAGCCATG	4	4e-05	0
GAATGGCACAGAAGGCCCT-ACTTCTACGTGCCCTTCTCCAATGCGATGGGTGTGGTACGCAGCCCCTTCGAGTACCCACAGTACTACCTGGCTGAGCCATG	4	4e-05	0
GAATGGCACAGAAGGCCCTAACTTCTACGTGCCCTTCT--------ATGGGTGTGGTACGCAGCCCCTTCGAGTACCCACAGTACTACCTGGCTGAGCCATG	4	4e-05	0
GAACGGCACAG-AGGCCC-AA-TT-TATGTGCCCTTCTCCAA--CGA-GGGTGTGG---G-AGCCCCTTCGAG--CCCGCAGTACTACCTGGC-GA-CCATG	3	3e-05	14GC22TT44TCAC51C54G58A74AG94GA
GAATGGCACAGAAGGCCCTAACTTCTACGTGCCATTCT------CGATGGGTGTGGTACGCAGCCCCTTCGAGTACCCACAGTACTACCTGGCTGAGCCATG	3	3e-05	0
GAATGGCACAGAAGGCCCTAACTTCTACGTGCCCTTCTCCAATGCGATGGGTGTGGTACGCAGCCCCTTCGAGTACCCACAGTACTACCTGGCTGAGCCATG	3	3e-05	42TGC
GAATGGCACAGAAGGCCCTAACTTCTACGTGCCCTTCTCCAATGCGATGGGTGTGGTACGCAGCCCCTTCGAGTACCCACAGTACTACCTGGCTGAGCCATG	3	3e-05	44TT
GAATGGCACAGAAGGCCCTAACTTCTACGTGCCCTTCTCCAATG------------------------TCGAGTACCCACAGTACTACCTGGCTGAGCCATG	3	3e-05	0
GAATGGCACAGAAGGCCCTAACTTCTACGTGCCCTTCTCCACT-CGATGGGTGTGGTACGCAGCCCCTTCGAGTACCCACAGTACTACCTGGCTGAGCCATG	3	3e-05	0
GAACGGCACAG-AGGCCC-AA-TT-TACGTGCCCTTCTCCAATGCGATGGGTGTGGTACGCAGCCCCTTCGAGTACCCACAGTACTACCTGGCTGAGCCATG	3	3e-05	14GC22TT
GAATGGCACAGAAGGCCCTAACTTCTACGTGCCCT-----------ATGGGTGTGGTACGCAGCCCCTTCGAGTACCCACAGTACTACCTGGCTGAGCCATG	3	3e-05	0
GAATGGCACAGAAGGCCCTAACTTCTACGTGCCCTTCTCCAATGCGATGGGTGTGGTACGCAGCCCCCTCGAGTACCCACAGTACTACCTGGCTGAGCCATG	3	3e-05	43G
GAACGGCACAG-AGGCCC-AA-TT-TATGTGCCCTTCTCCAA--CGA--GGCGTGGTACGCAGCCCCTTCGAGTACCCACAGTACTACCTGGCTGAGCCATG	3	3e-05	14GC22TT44TCAC
GAATGGCACAGAAGGCCCTAACTTCTACG-------------TGCGATGGGTGTGGTACGCAGCCCCTTCGAGTACCCACAGTACTACCTGGCTGAGCCATG	3	3e-05	0
GAATGGCACAGACGGCCCTAACTTCTACGTGCCCTTCTCCAAT-CGATGGGTGTGGTACGCAGCCCCTTCGAGTACCCACAGTACTACCTGGCTGAGCCATG	3	3e-05	0
GAATGGCACAGAAGGCCCTAACTTCTACGTGCCCTTCTCCAATGCGA-GGGTGTGGTACGCAGCCCCTTCGAGTACCCACAGTACTACCTGGCTGAGCCATG	3	3e-05	0
GAATGGCACAGAAGGCCCTAACTTCTACGTGCCCTTCTCCAATGCGATGGGTGTGGTACGCACCCCCTTCGAGTACCCACAGTACTACCTGGCTGAGCCATG	3	3e-05	43G
GAATGGCACAGAAGGCCCTAACTTCTACGTGCCCTTCTCCAAT-CGATGGGTGTGGTACGCAGCCCCTTCGAGTACCCACAGTACTACCTGGCCGAGCCATG	3	3e-05	0
GAATGGCACAGAAGGCCCTAACTTCTACGTGCCCTTCTCCAATGC--T--GTGTGGTACGCAGCCCCTTCGAGTACCCACAGTACTACCTGGCTGAGCCATG	3	3e-05	0
GAATGGCACAGAAGGCCCTAACTTCTACGTGCCCTTCTCCAATGCGA----TGTGGTACGCAGCCCCTTCGAGTACCCACAGTACTACCTGGCTGAGCCATG	3	3e-05	0
GAATGGCACAGAAGGCCCTAACTTCTACGTGCCCTTCTCCAATGCGACGGGTGTGGTACGCAGCCCCTTCGAGTACCCACAGTACTACCTGGTTGAGCCATG	3	3e-05	0
GAATGGCACAGAAGGCCCTAACTTCTACGTGCCCTTCTCCAATGCGACGGGTGTGGTATGCAGCCCCTTCGAGTACCCACAGTACTACCTGGCTGAGCCATG	3	3e-05	0
GAATGGCACAGAAGGCCCTGACTTCTACGTGCCCTTCTCCAATGCGACGGGTGTGGTACGCAGCCCCTTCGAGTACCCACAGTACTACCTGGCTGAGCCATG	3	3e-05	0
GAATGGCACAGAAGGCCCTAACTTCTACGTGCCCTTCTCCAATACGACGGGTGTGGTACGCAGCCCCTTCGAGTACCCACAGTACTACCTGGCTGAGCCATG	3	3e-05	0
GAATGGCACAGAAGGCCCTAACTTCTACGTGCCCTTCTCCAATGCGACGGGTGTGGTACGCAGCCCCTTCGAGTACCCACAGTACTACCTGGCTGAGCCATA	3	3e-05	0
GAATGGCACAGAAGGCCCTAACTTCTACCTGCCCTTCTCCAATGCGATGGGTGTGGTACGCAGCCCCTTCGAGTACCCACAGTACTACCTGGCTGAGCCATG	3	3e-05	0
GAATGGCACAGAAGGCCCTAACTTCTACGTGCCCTTCTCCAAT----------TGGTACGCAGCCCCTTCGAGTACCCACAGTACTACCTGGCTGAGCCATG	3	3e-05	0
GAATGGCACAGAAGGCCCTAACTTCTGCGTGCCCTTCTCCAAT-CGATGGGTGTGGTACGCAGCCCCTTCGAGTACCCACAGTACTACCTGGCTGAGCCATG	3	3e-05	0
GAATGGCACAGAAGGCCCTAACTTCTACGTGCCCTTCTCCAATGCGATGGGTGTGGTACGCAGCCCCTTCGAGTACCCACAGTTCTACCTGGCTGAGCCATG	3	3e-05	0
GAATGGCACAGAAGGCCCTAACTTCTACGTGCCCTTCTCCAATGCGATGGGTGTGGTACGCA-CCCCTTCGAGTACCCACAGTACTACCTGGCTGAGCCATG	3	3e-05	0
GAATGGCACAGAAGGCCCTAACTTCTACGTGCCCTTCTCCAAT-CGATGGGTGTGATACGCAGCCCCTTCGAGTACCCACAGTACTACCTGGCTGAGCCATG	3	3e-05	0
GAATGGCACAGAAGGCCCTAACTTCTACGTGCCCTTCTCCAATGC------------ACCCAGCCCCTTCGAGTACCCACAGTACTACCTGGCTGAGCCATG	3	3e-05	0
GAATGGCACAGAAGGCCCTAACTTCTACGTGCCCTTCTCCAATGCGATGGGTGTGGTACGCAGCCCCTGCGAGTACCCACAGTACTACCTGGCTGAGCCATG	3	3e-05	0
GAATGGCACAGAAGGCCCTAACTTCTACGTGCCCTTC-----------GGGTGTGGTACGCAGCCCCTTCGAGTACCCACAGTACTACCTGGCTGAGCCATG	3	3e-05	0
GAACGGCACAG-AGGCCC-AA-TT-TATGTGCCCTTCTCCAA--CGA--GGCGTGGT--GCAGCCCCTTCGAG--CCCGCAGTACCACCTGGC-GA-CCATG	3	3e-05	14GC22TT44TCAC59GG74AG94GA
GAATGGCACAGAAGGCCCTAACTTCTACGTGCCCTTCTCCAATGCGATGGGTGTGGTACGCAGCCCCTTCGAGTACCCACAGTACTACCTGGCTG-GCCATG	3	3e-05	96T
GAATCGCACAGAAGGCCCTAACTTCTACGTGCCCTTCTCCAATGCGATGGGTGTGGTACGCAGCCCCTTCGAGTACCCACAGTACTACCTGGCTGAGCCATG	3	3e-05	0
GAATGGCACAGAAGGCCCTAACTTCTACGTGCCC-------------------TGGTACGCAGCCCCTTCGAGTACCCACAGTACTACCTGGCTGAGCCATG	3	3e-05	0
GAATGGCACAGAAGGCCCTAACTTCTACGTGCCCTTCTCCAAT----T---TGTGGTACGCAGCCCCTTCGAGTACCCACAGTACTACCTGGCTGAGCCATG	3	3e-05	0
GAACGGCACAG-AGGCCC-AA-TT-TATGTGCCCTTCTCCAA--CGA--GGCGTGGTACGGAGCCCCTTCGAG--CCCGCAGTACTACCTGGC-GA-CCATG	3	3e-05	14GC22TT44TCAC74AG94GA
GAATGGCACAGAAGGCCCTAACTTCTACGTGCCCTTCTCCAATG-----------------AGCCCCTTCGAGTACCCACAGTACTACCTGGCTGAGCCATG	3	3e-05	0
GAATGGCACAGAAGGCCCTAACTTCTACGTGCCCTTCTCCAAT-CGATGGGTGTGGTACGCAGCCCCTTCAAGTACCCACAGTACTACCTGGCTGAGCCATG	3	3e-05	0
GAATGGCACGGAAGGCCCTAACTTCTACGTGCCCTTCTCCAATGCGACGGGTGTGGTACGCAGCCCCTTCGAGTACCCACAGTACTACCTGGCTGAGCCATG	3	3e-05	0
GAATGGCACAGAAGGCCCTAACGTCTACGTGCCCTTCTCCAATGCGATGGGTGTGGTACGCAGCCCCTTCGAGTACCCACAGTACTACCTGGCTGAGCCATG	3	3e-05	0
GAATGGCACAGAAGGCCCTAACTTCTACGTGCCCTTCTCCAAGGCGATGGGTGTGGTACGCAGCCCCTTCGAGTACCCACAGTACTACCTGGCTGAGCCATG	3	3e-05	42C
GAATGGCACAGAAGGCCCTAACTTCTACGTGCCCTTCTCCAATCCGATGGGTGTGGTACGCAGCCCCTTCGAGTACCCACAGTACTACCTGGCTGAGCCATG	3	3e-05	0
GAATGGCACAGAAGGCCCTAACTTC-------------------CGATGGGTGTGGTACGCAGCCCCTTCGAGTACCCACAGTACTACCTGGCTGAGCCATG	3	3e-05	0
GAATGGCACAGAAGGCCCTAACTTCTACGTGCCCTTCTCCAATGCGATGGGTGTGGTACGCAGCCCCTTCGAGTACCCACAGTACTACCTGGCTGAGCCATG	3	3e-05	43GCC
AAACGGCACAG-AGGCCC-AA-TT-TATGTGCCCTTCTCCAA--CGA--GGCGTGGT--GCAGCCCCTTCGAG--CCCGCAGTACTACCTGGC-GA-CCATG	3	3e-05	14GC22TT44TCAC59GG74AG94GA
GAATGGCACAGAAGGCCCTAACTTCTACGTGCCCTTCTCCAATGCGA------TGGTACGCAGCCCCTTCGAGTACCCACAGTACTACCTGGCTGAGCCATG	3	3e-05	0
GAATGGCACAGAAGGCCCTAACTTCCACGTGCCCTTCTCCAATGCGACGGGTGTGGTACGCAGCCCCTTCGAGTACCCACAGTACTACCTGGCTGAGCCATG	3	3e-05	0
GAATGGCACAGAAGGCCCTAACTTCTACGTGCCCTTCTCCAATGCGATGGGTGTGGTACGCAGCCCCTTCGAGTACCCACAGTACTACCTGGCTGAGCCATG	3	3e-05	44AAGCCCGGGCGGCCTCAGTGAGCGAGCGAGCGCGCAGAGAGGGAGTGGCC
GAATGGCACAGAAGGCCCTAACTTCTACGTGCCCT-------TGCGATGGGTGTGGTACGCAGCCCCTTCGAGTACCCACAGTACTACCTGGCTGAGCCATG	3	3e-05	0
GAATGGCACAGAAGGCCCTAACTTCTACGTGCCCTTCTC-------ATGGGTGTGGTACGCAGCCCCTTCGAGTACCCACAGTACTACCTGGCTGAGCCATG	3	3e-05	0
GCATGGCACAGAAGGCCCTAACTTCTACGTGCCCTTCTCCAAT--GATGGGTGTGGTACGCAGCCCCTTCGAGTACCCACAGTACTACCTGGCTGAGCCATG	3	3e-05	0
GAATGGCACAGAAGGCCCTAACTTCTACGTGCCCTTCTCCAATGCGACGGGTGTGGTACGCAGCCCCTTCGAGTACCCACAGTACTACCTGGCTGAGACATG	3	3e-05	0
GAATGACACAGAAGGCCCTAACTTCTACGTGCCCTTCTCCAAT--GATGGGTGTGGTACGCAGCCCCTTCGAGTACCCACAGTACTACCTGGCTGAGCCATG	3	3e-05	0
GAATGGCACAGAAGGCCCTAACTTCTACGTGCCCTTCTCCAATGCGATGGGTCTGGTACGCAGCCCCTTCGAGTACCCACAGTACTACCTGGCTGAGCCATG	3	3e-05	0
GAATGGCACAGAAGGCCCTAACTTCTACGTGCCCTTCTCCAATGCGATGGGTGTGGTACGCAGCCCCTTCGAGTACCCACAGTACTACCTGGCTGAGCCATG	3	3e-05	43GAA
GAATGGCACAGAAGGCCCTAACTTCTACGTGCCCTTCTCCAATGCGATGGGTGTGGTACGCAGCCCCTTCGAGTACCCCCAGTACTACCTGGCTGAGCCATG	3	3e-05	0
GAATGGCACAGAAGGCCCTAACTTCTACGTGCCCTTCTCCAAT--GATGGGTGTGGTACGCAGCCCCTTCGAGTACCCACAGTACTACCTGGCTGAGCCATG	3	3e-05	44A
GAATGGCACAGAAGGCCCTAACTTCTACGTGCCCTTCTCCAAT--GATGGGTGTGGTACGCAGCCCCTTCGAGTACCCACAGTACTACCTGGTTGAGCCATG	3	3e-05	0
GAATGGCACAGAAGGCCCTAACTTCTACGTGCCCTTCTCCAATGCGATGGGTGTGGGACGCAGCCCCTTCGAGTACCCACAGTACTACCTGGCTGAGCCATG	3	3e-05	0
GAACGGCACAG-AGGCCC-AA-TT-TATGTGCCCTTCTCCAA--CGA--GGCGTGGT--GCAGCCCCTTCGAG--CCCACAGTACTACCTGGC-GA-CCATG	3	3e-05	14GC22TT44TCAC59GG74AG94GA
GAATGGCACAGAAGGCCCTAACTTCTACGTGCCCTTCTCAAATGCGACGGGTGTGGTACGCAGCCCCTTCGAGTACCCACAGTACTACCTGGCTGAGCCATG	3	3e-05	0
GAATGGCACAGAAGGCCCTAACTTCTACGTGCCCTTCTCCAATG--------------CGCAGCCCCTTCGAGTACCCACAGTACTACCTGGCTGAGCCATG	3	3e-05	0
GAATGGCACAGAAGGCCCTAACTTCTACGTGCCCTTCTCCAATGC---------GGTACGCAGCCCCTTCGAGTACCCACAGTACTACCTGGCTGAGCCATG	3	3e-05	0
GAATGGCACAGAAGGCCCTAACTTCTACGTGCCC----------------GTGTGGTACGCAGCCCCTTCGAGTACCCACAGTACTACCTGGCTGAGCCATG	3	3e-05	0
GAATGGCACAGAAGGCCCTAACTTCTACGTGCCCTTCTCC---------------GTACGCAGCCCCTTCGAGTACCCACAGTACTACCTGGCTGAGCCATG	3	3e-05	0
GAATGGCACAGAAGGGCCTAACTTCTACGTGCCCTTCTCCAATGCGATGGGTGTGGTACGCAGCCCCTTCGAGTACCCACAGTACTACCTGGCTGAGCCATG	3	3e-05	0
GAATGGCACAGAAGGCCCTAACTTCTCCGTGCCCTTCTCCAATGCGATGGGTGTGGTACGCAGCCCCTTCGAGTACCCACAGTACTACCTGGCTGAGCCATG	3	3e-05	0
GAATGGCACAGAAGGCCCTAACTTCTACGTGCCCTTCTCCAATGCGATGGGTGTGGTACGCAGCCCCTTCGAGTACCCACAGTACTACCTGGGTGAGCCATG	3	3e-05	0
GAATGGCACAGAAGGCCCTAACTTCTACGTGCCCTTCTCCAATGCGATGGGTGTGGTACGCAGCCCCTTCGAGTACCCACAGTACTACCTGGCTGAGCCATG	3	3e-05	44GT
GAATGGCACAGAAGGCCCTAACTTCTACGTGCCCTTCTCCAATGCGATGGGTGTGGTACGCAGCCCCTTCGAGTACCCACAGTACTACCTGGCTGAGCCATG	3	3e-05	60CAGCCCCTTC
GAATGGCACAGAAGGCCCTAACTTCTACGTGCCCTTCTCCAAT----T--GTGTGGTACGCAGCCCCTTCGAGTACCCACAGTACTACCTGGCTGAGCCATG	3	3e-05	0
GAATGGCACAGAAGGCCCTAACTTCTACGTGCCCTTCTCCAATGCGACGGGTGTGGTACGCAGCCCCTTTGAGTACCCACAGTACTACCTGGCTGAGCCATG	3	3e-05	0
GAACGGCACAG-AGGCCC-AA-TT-TATGTGCCCTTCTCCAA--CGA--GGCGTGGT--GCAGCCCCTTCGAG--CCCGCAGTACTACCTGGCGGAGCCATG	3	3e-05	14GC22TT44TCAC59GG74AG
GAATGGTACAGAAGGCCCTAACTTCTACGTGCCCTTCTCCAAT-CGATGGGTGTGGTACGCAGCCCCTTCGAGTACCCACAGTACTACCTGGCTGAGCCATG	3	3e-05	0
GAATGGCACAGAAGGCCCTAACTTCTACGTGCCCTTCTCCAATG----------------------------G--------GTACTACCTGGCTGAGCCATG	3	3e-05	0
GAATGGCACAGAAGGCCCTAACTTCTACGTGCCCTTCTCCAATGCGACGGATGTGGTACGCAGCCCCTTCGAGTACCCACAGTACTACCTGGCTGAGCCATG	3	3e-05	0
GAATGGCACAGAAGGCCCTAACTTCTACGTGCCCTT-------------------GTACGCAGCCCCTTCGAGTACCCACAGTACTACCTGGCTGAGCCATG	3	3e-05	0
GAATGGCACAGAAGGCCCTAACTTCTACGTGCCCTTCTCCAATG-GATGGGTGTGGTACGCAGCCCCTTCGAGTACCCACAGTACTACCTGGCTGAGCCATG	3	3e-05	43GGG
GAATGGCACAGAAGG-------------------------------------------------CCCTTCGAGTACCCACAGTACTACCTGGCTGAGCCATG	3	3e-05	0
GAATGGCACAGAAGGCCCTAACTTCTACGTGCCCTTCTCCAATGCGATGGGTGTGGTACGCAGCCCCTTCGAGTACCCACAGTACTACCTGGCTGAGCCATG	3	3e-05	67A
GAATGGCACAGAAGGCCCTAACTTCTACGTGCCCTTCTCCAATGCGATGGGTGTGGTACGCTGCCCCTTCGAGTACCCACAGTACTACCTGGCTGAGCCATG	3	3e-05	0
GAATGGCACAGAAGGCCCTAACTTCTACGTGCCCTTCTCCAAT-CGACGGGTGTGGTACGCAGCCCCTTCGAGTACCCACAGTACTACCTGGCTGAGCCATG	3	3e-05	0
GAATGGCACAGAAGGCCCTAACTTCT------------------CGATGGGTGTGGTACGCAGCCCCTTCGAGTACCCACAGTACTACCTGGCTGAGCCATG	3	3e-05	0
GAATGGCACAGAAGGCCCTAACTTCTACGTGCCCTTCTCCAATGCGATGGGTGTGGTACGCAGGCCCTTCGAGTACCCACAGTACTACCTGGCTGAGCCATG	3	3e-05	0
GAATGGCACAGAAGGCCCTAACTTCTACGTGCCCTTCTCCAATGCGACGGGTGTGGTACGCAGCCCCTTCGAGTACCCACGGTACTACCTGGCTGAGCCATG	3	3e-05	0
GAATGGCACAGAAGGCCCTAACTTCTACGTGCCTTTCTCCAAT-CGATGGGTGTGGTACGCAGCCCCTTCGAGTACCCACAGTACTACCTGGCTGAGCCATG	3	3e-05	0
GAATGGCACAGAAGGCCCTCACTTCTACGTGCCCTTCTCCAATGCGACGGGTGTGGTACGCAGCCCCTTCGAGTACCCACAGTACTACCTGGCTGAGCCATG	3	3e-05	0
GAATGGCACAGAAGGCCCTAACTTCTACGTGCCCTTCTC------------TGTGGTACGCAGCCCCTTCGAGTACCCACAGTACTACCTGGCTGAGCCATG	3	3e-05	0
GAATGGCACAGAAGGCCCTAACTTCTACGTGCCCTTCTCCA-----ATGGG---GGTACGCAGCCCCTTCGAGTACCCACAGTACTACCTGGCTGAGCCATG	3	3e-05	0
GAATGGCACAGAAGGCCCTAACTTCTACGTGCCCTTCTCCAATGCGATGGGTGTGGTACGCAGCCCCTTCGAGTACCCACAGTACTACCTGCCTGAGCCATG	3	3e-05	0
GAATGGCACAGAAGGCCCTAACTTCTACGTGCCCTTCTCCAA---------------------------CGAGTACCCACAGTACTACCTGGCTGAGCCATG	3	3e-05	0
GAATGGCACAGAAGGCCCTAAGTTCTACGTGCCCTTCTCCAATGCGATGGGTGTGGTACGCAGCCCCTTCGAGTACCCACAGTACTACCTGGCTGAGCCATG	3	3e-05	0
GAATGGCACAGAAGGCCCTAACTTCTACGTGCCCTTCTCCAATGCGATGGGTGTGGTACGCAGCCCC-TCGAGTACCCACAGTACTACCTGGCTGAGCCATG	3	3e-05	0
GAATGGCACAGAAGGCCCTAACTTCTACGTGCCCTTCTCCAATGCGATGGGTGTGGTACGCAGCCCCTTCGAGTACCCACAGTACTACCTGGCTGAGCCATG	3	3e-05	43GCGGCCTCAGTGAGCGAGCGAGCGCGCA
GAATGGCACAGAAGGCCCTAACTTCTACGTGCCCTTCTCCAATGCGATGGGTGTGGTACGCAGCCCCTTCGAGTACCCACAGTACTACCTGGCTGAGCCATG	3	3e-05	47TGG
GAATGGCACAGAAGGCCCTAACTTCTACGTGCCATTCTCCAATGCGACGGGTGTGGTACGCAGCCCCTTCGAGTACCCACAGTACTACCTGGCTGAGCCATG	2	2e-05	0
GAATGGCACAGAAGGCCCTAACTTCTACGTGCCCTTCTCCA---CGATGGGAGTGGTACGCAGCCCCTTCGAGTACCCACAGTACTACCTGGCTGAGCCATG	2	2e-05	0
GAATGGCACAGAAGGCCCTAACTTCTACGTGCCCTTCTCCAATGCGATGGGTGTGGTACGCAGCCCCTTCGAGTACCCACAGTACTACCTGGCTGAGCCATG	2	2e-05	42TGT
GAATGGCACAGAAGGCCCTAACTTCTACGTGCCATTCTCCAATG-GATGGGTGTGGTACGCAGCCCCTTCGAGTACCCACAGTACTACCTGGCTGAGCCATG	2	2e-05	0
GAATTGCACAGAAGGCCCTAACTTCTACGTGCCCTTCTCCAAT--GATGGGTGTGGTACGCAGCCCCTTCGAGTACCCACAGTACTACCTGGCTGAGCCATG	2	2e-05	0
GAATGGCACAGAAGGCCCTAACTTCTACGTGCCC---------------------GTACGCAGCCCCTTCGAGTACCCACAGTACTACCTGGCTGAGCCATG	2	2e-05	0
GAATGGCACAGAAGGCCCTAACTTCTACGTGCCCTTCTCCAATGCGATGGGTGTGGTCCGCAGCCCCTTCGAGTACCCACAGTACTACCTGGCTGAGCCATG	2	2e-05	0
GATTGGCACAGAAGGCCCTAACTTCTACGTGCCCTTCTCCAATGCGACGGGTGTGGTACGCAGCCCCTTCGAGTACCCACAGTACTACCTGGCTGAGCCATG	2	2e-05	0
GAATGGCACAGAAGGCCCTAACTTGTACGTGCCCTTCTCCAATGCGATGGGTGTGGTACGCAGCCCCTTCGAGTACCCACAGTACTACCTGGCTGAGCCATG	2	2e-05	0
GAATGGCACAGAAGGCCCTAACTTCTACGTGCCCTTCTCCAA--CGATGGGTGTGGTACACAGCCCCTTCGAGTACCCACAGTACTACCTGGCTGAGCCATG	2	2e-05	0
GAGTGGCACAGAAGGCCCTAACTTCTACGTGCCCTTCTCCAAT-CGATGGGTGTGGTACGCAGCCCCTTCGAGTACCCACAGTACTACCTGGCTGAGCCATG	2	2e-05	0
GAACGGCACAG-AGGCCC--ACTT-TATGTGCCCTTCTCCAA--CGA--GGCGTGGT--GCAGCCCCTTCGAG--CCCGCAGTACTACCTGGC-GA-CCATG	2	2e-05	14GC21TT44TCAC59GG74AG94GA
GAATGGCACAGAAGGCCCTAACTTCTACGTGCCCTTCTCCAATGCGATGGGTGTGGTACGCAGCCCCTTCGAGTACCCACAGTACTACCTGGCTGAGCCATG	2	2e-05	41CTTTGGTCGCCCGGCCTC60G62GAGCGAGCGAGCGCGCAGAGAG
GAATGGCACAGAAGGCCCTAACTTCTACGTGCCCTTCTCCAATGCAACGGGTGTGGTACGCAGCCCCTTCGAGTACCCACAGTACTACCTGGCTGAGCCATG	2	2e-05	0
GAATGGCACAGAAGGCCCTAACTTCTACGTGCCCTTCTCCAAT-CGATGGGTGTGGTACGCAGCCCCTTCGAGTACCCACAGTACTACCTGGCTGAGCCACG	2	2e-05	0
GAATGGCACAGAAGGCCCTAACTTCTACGTGCCCTTCTCCAATGCG-TGGGTGTGGTACGCAGCCCCTTCGAGTACCCACAGTACTACCTGGCTGAGCCATG	2	2e-05	47C
GGATGGCACAGAAGGCCCTAACTTCTACGTGCCCTTCTCCAAT--GATGGGTGTGGTACGCAGCCCCTTCGAGTACCCACAGTACTACCTGGCTGAGCCATG	2	2e-05	0
GGATGGCACAGAAGGCCCTAACTTCTACGTGCCCTTCTCCAAT-CGATGGGTGTGGTACGCAGCCCCTTCGAGTACCCACAGTACTACCTGGCTGAGCCATG	2	2e-05	0
GAATGGCACAGAAGGTCCTAACTTCTACGTGCCCTTCTCCAATGCGACGGGTGTGGTACGCAGCCCCTTCGAGTACCCACAGTACTACCTGGCTGAGCCATG	2	2e-05	0
GAATGGCACAGAAGGCCCCAACTTCTACGTGCCCTTCTCCAATGCGATGGGTGTGGTACGCAGCCCCTTCGAGTACCCACAGTACTACCTGGCTGAGCCATG	2	2e-05	43G
GAATGGCACAGAAGGCCCTAACTTCTACGTGCCC-TCTCCAATGCGATGGGTGTGGTACGCAGCCCCTTCGAGTACCCACAGTACTACCTGGCTGAGCCATG	2	2e-05	42G
GAA-----------------------------------------CGATGGGTGTGGTACGCAGCCCCTTCGAGTACCCACAGTACTACCTGGCTGAGCCATG	2	2e-05	0
GAATGGCACAGAAGGCCCTAACTTCTACGTGCCCTTCT-CAATGCGATGGGTGTGGTACGCAGCCCCTTCGAGTACCCACAGTACTACCTGGCTGAGCCATG	2	2e-05	0
GAATGGCACAGAAGGCCCTAACTTCTACGTGCCCTTCTCCAATGCGATGGGTGTGGTACGCAGCCCCTTCGAGTACCCACAGTACTACCTGGCTGAGCCATG	2	2e-05	41CTGGTCGCCCGGCCTCAGTGAGCGAGCGAGCGCGCAGAGAGGG85G88GCCAA
GAATGGCACAGAAGGCCCTAACTTCTACGTGCCCTTCTCCAACGCGACGGGTGTGGTACGCAGCCCCTTCGAGTACCCACAGTACTACCTGGCTGAGCCATG	2	2e-05	0
GAATGGCACAGAAGGCCCTAACTTCTACGTGCCCTTCTCCAATG-------------------------------CCCACAGTACTACCTGGCTGAGCCATG	2	2e-05	0
GAATGGCACAGAAGGCCCTAACTTCTACGTGCCCTTCTCCA----GA--GGTGTGGTACGCAGCCCCTTCGAGTACCCACAGTACTACCTGGCTGAGCCATG	2	2e-05	0
GAATGGCACAGAAGGCCCTAACTTCTACGTGCCCTTCTCCAATGCGATGGATGTGGTACGCAGCCCCTTCGAGTACCCACAGTACTACTTGGCTGAGCCATG	2	2e-05	0
GAATGGCACAGAAGGCCCTAACTTCTATGTGCCCTTCTCCAATG-GATGGGTGTGGTACGCAGCCCCTTCGAGTACCCACAGTACTACCTGGCTGAGCCATG	2	2e-05	0
GAATGGCACAGAAGGCCCTCACTTCTACGTGCCCTTCTCCACTGCGATGGGTGTGGTACGCAGCCCCTTCGAGTACCCACAGTACTACCTGGCTGAGCCATG	2	2e-05	0
GAATGGCACAGAGGGCCCTAACTTCTACGTGCCCTTCTCCAAT-CGATGGGTGTGGTACGCAGCCCCTTCGAGTACCCACAGTACTACCTGGCTGAGCCATG	2	2e-05	0
GAATGGCACAGAAGGCCCTAACTTCTACGTG-CCTTCTCCAATGCGATGGGTGTGGTACGCAGCCCCTTCGAGTACCCACAGTACTACCTGGCTGAGCCATG	2	2e-05	0
GAACGGCACAG-AGGCCC-AA-TT-TATGTGCCCTTCTCCAA--CGA--GGCGTGGT--GCAGCCCCTTCGAG--CCCGCAGTACTACCCGGC-GA-CCATG	2	2e-05	14GC22TT44TCAC59GG74AG94GA
GAATGGCACAGAAGGCCCTAACTTCTACGTGCCCTTCTCCAATGCGACGGGTGTGGTACGCAGCCCCTTCGAGTACCCACAGTACTACCTGGCTGAGCCAGG	2	2e-05	0
GAATGGCACAGAAGGCCCTAACTTCTACGTGCCCTTCTCCAATG-GATGGGTGTGGTACGCAACCCCTTCGAGTACCCACAGTACTACCTGGCTGAGCCATG	2	2e-05	0
GAATGGCACAGAAGGCCCTAACTTCTACGTGCCCTTCTCCAAT-CGATGGGTGTGGTACGCAGCCCCTTCGAGTACCCACAGTACTACCTGGCTGAGCCATT	2	2e-05	0
GGATGGCACAGAAGGCCCTAACTTCTACGTGCCCTTCTCCAATGCGACGGGTGTGGTACGCAGCCCCTTCGAGTACCCACAGTACTACCTGGCTGAGCCATG	2	2e-05	0
GAATGGCACAGAAGGCCCTAACTTCTACGTGCCCCTCTCCAAT-CGATGGGTGTGGTACGCAGCCCCTTCGAGTACCCACAGTACTACCTGGCTGAGCCATG	2	2e-05	0
GAATGGCACAGAAGGCCCTAACTTCTACGTGCCCTTCTCCAATGCGA--GGTGTGGTACGCAGCCCCTTCGAGTACCCACAGTACTACCTGGCTGAGCCATG	2	2e-05	46AC
GAACGGCACAG-AGGCCC-AA-TT-TATGTGCCCTTCTCCAA--CG-TGGGCGTGGT--GCAGCCCCTTCGAG--CCCGCAGTACTACCTGGC-GA-CCATG	2	2e-05	14GC22TT45CAC59GG74AG94GA
GAATGGCACAGAAGGCCCTAACTTCTACGTGCCCTTCTC-----CGATGGGTGTGGTACGCAGCCCCTTCGAGTACCCACGGTACTACCTGGCTGAGCCATG	2	2e-05	0
GAACGGCACAG-AGGCCC-AA-TT-TATGTGCCCTTCTCCAATGC-ATG---GTG---CGGAGCCCCTTCGAG--CCCGCAGTACTACCTGGC-GA-CCATG	2	2e-05	14GC22TT42CG45CACAG74AG94GA
GAACGGTACAG-AGGCCC-AA-TT-TATGTGCCCTTCTCCAA--CGA--GGCGTGGT--GCAGCCCCTTCGAG--CCCGCAGTACTACCTGGC-GA-CCATG	2	2e-05	14GC22TT44TCAC59GG74AG94GA
GAATGGCACAGAAGGCCCTAACTTCTACGTGCCCTTCTCCAATGCGAT-GGTGTGGTACGCAGCCCCTTCGAGTACCCACAGTACTACCTGGCTGAGCCATG	2	2e-05	51C
GAATGGCACAGAAGGCCCTAACTACTACGTGCCCTTCTCCAAT-CGATGGGTGTGGTACGCAGCCCCTTCGAGTACCCACAGTACTACCTGGCTGAGCCATG	2	2e-05	0
GAATGGCACAGAAGGCCCTAACTTCTACGTGCCCTTCTCCAAT-CGATGGGTGTGGTACGCAGCCCCTTCGGGTACCCACAGTACTACCTGGCTGAGCCATG	2	2e-05	0
GAATGGCACAGAAGGCCCTAACTTCTACGTGCCCTTCTCCAATGCGAT--GTGTGGTACGCAGCCCCTTCGAGTACCCACAGTACTACCTGGCTGAGCCATG	2	2e-05	47CG
GAATGGCACAGAAGGCCCTAACTTCCACGTGCCCTTCTCCAATGCGATGGGTGTGGCACGCAGCCCCTTCGAGTACCCACAGTACTACCTGGCTGAGCCATG	2	2e-05	0
GAATGGCACAGAAGGCCCTAACTTCTACGTGCCCTTCTCCAATGCGATGGGTGTGGTACGCAGCCCCTTCGAGTACCCACAGTACTACCTGGCTGAGCCATG	2	2e-05	44ACCCCTAGTGATGGAGTTGGCCACTCCCTCTCTGCGCGCTCGCTCGCTCACTGAGGCCGCC
GAATGGCACAGAAGGCCCTAACTTCTACGTGCCCTTCTCCAATGTGATGGGTGTGGTACGCAGCCCCTTCGAGTACCCACAGTACTACCTGGCTGAGCCATG	2	2e-05	43GA52A55TGGCCACTCCCTCTCTGCGCGCTCGCTC84CTCAC90GAGGCCGGGCGA
GAATGGCACAGAAGGCCCTAACTTCTACGTGCCCTTCTCCAAT-CAATGGGTGTGGTACGCAGCCCCTTCGAGTACCCACAGTACTACCTGGCTGAGCCATG	2	2e-05	0
GAATGGCACAGAAGGCCCTAACTTCTACGTGCCCTTCTCCAAT--GATGGGTGTGGTACGCAGCCCCTTCGAGTACCCACAGTACCACCTGGCTGAGCCATG	2	2e-05	0
GAACGGCACAG--GGCCCCAA-TT-TATGTGCCCTTCTCCAA--CGA--GGCGTGGT--GCAGCCCCTTCGAG--CCCGCAGTACTACCTGGC-GA-CCATG	2	2e-05	9CG22TT44TCAC59GG74AG94GA
GAATGGCACAGAAGGCCCTAACTTCTACGTGCCCTTTTCCAA--CGATGGGTGTGGTACGCAGCCCCTTCGAGTACCCACAGTACTACCTGGCTGAGCCATG	2	2e-05	0
GAATGGCACAGAAGGCCCTAACTTCTACGTGC------------CGATGGGTGTGGTACGCAGCCCCTTCGAGTACCCACAGTACTACCTGGCTGAGCCATG	2	2e-05	0
GAATGGCACAGAAGGCCCTAACTTCTACGTGCCCTTCTCCAATGCGACGGGTGTGGTACGCAGCCCCTTCGAGTACCCACAGTACTACCTGGGTGAGCCATG	2	2e-05	0
GAATGGCACAGAAGGCCCTAACTTCTACGTGCCCTTCTCCAATGCGATGGGTGTGGTACGCAGCCCCTTCGAGTACCCACAGTACTACCTGGCTGAGCCATG	2	2e-05	41TGGTCGCCCGGCCTCAGTGAGCGAGCGAGCGCGCAGAGAGGG84G87GCCAA
GAATGGCACAGAAGGCCCTAACTTCTACGTGCCCTTCTCCAAT-CGATGGGTGTGGTACGCAGCCCCTTCGAATACCCACAGTACTACCTGGCTGAGCCATG	2	2e-05	0
GAATGGCACAGAAGGCCCTA--------------------------ATGGGTGTGGTACGCAGCCCCTTCGAGTACCCACAGTACTACCTGGCTGAGCCATG	2	2e-05	0
GAATGGCACAGAAGGCCCTAACTTCTACGTGCCCTTCTCCAATGCGATGGGTGTGGTACGCAGCCCCTTCGAGTACCCACAGTACTACCTGGCTGAGCCATG	2	2e-05	44ATTTTATTTATTTATTTATTTATTTATTTGCTTTCCTATTTCCTTTTGCCTTTCAGCT
GAATGGCACAGAAGGCCCCAACTTCTACGTGCCCTTCTCCAATGCGACGGGTGTGGTACGCAGCCCCTTCGAGTACCCACAGTACTACCTGGCTGAGCCATG	2	2e-05	0
GAATGGCACAGAAGGCCCTAACTTCTACGTGCCCTTCTCCAAT-CGATGGGTGTGGTACGCAGCCCCTTCGAGTACCCACGGTACTACCTGGCTGAGCCATG	2	2e-05	0
GAATGGCACAGAAGGCCCTAACTTCTACGTGCCCTTCTCCA----------TGTGGTACGCAGCCCCTTCGAGTACCCACAGTACTACCTGGCTGAGCCATG	2	2e-05	0
GAATGGCACAGAAGGCCCTAACTTCTACGTGCCCTTCTCCAATGCGATGGGTGTGGTACGCAGCCCCTTCGAGTACCCACAGTACTACCTGGCTG-GCCATG	2	2e-05	96C
GAATGGCACATAAGGCCCTAACTTCTACGTGCCCTTCTCCAATGCGACGGGTGTGGTACGCAGCCCCTTCGAGTACCCACAGTACTACCTGGCTGAGCCATG	2	2e-05	0
GAATGGCACAGAAGGCCCTAACTTCTACGTGCCCTTCTCCAAT-CGTTGGGTGTGGTACGCAGCCCCTTCGAGTACCCACAGTACTACCTGGCTGAGCCATG	2	2e-05	0
GAATGGCACAGAAGGCCCTAACTTCTACGTGCCCTTCTCCAATGCGATGGGTGTGGTACGCAGCCCCTTCGAGTACCGACAGTACTACCTGGCTGAGCCATG	2	2e-05	0
GAATGGCACAGAAGGCCCTAACTTC-------------------------------TACGCAGCCCCTTCGAGTACCCACAGTACTACCTGGCTGAGCCATG	2	2e-05	0
GAATGGCACAGAAGGCCCTAACTTCTACGTGCCCTTCTCCAATGCGATGGGTGT-GTACGCAGCCCCTTCGAGTACCCACAGTACTACCTGGCTGAGCCATG	2	2e-05	0
GAATGGCACAGAAGGCCCTAACTTCTACGTGCCCTTCTCCAAT-CGATGGGTGTGGTACGCAGCTCCTTCGAGTACCCACAGTACTACCTGGCTGAGCCATG	2	2e-05	0
GAATGGCACAGAAGGCCCTAACTTCTACGT--------------CGATGGGTGTGGTACGCAGCCCCTTCGAGTACCCACAGTACTACCTGGCTGAGCCATG	2	2e-05	0
GAATGGCACAGAAGGCCCTAACTTCTACGTGCCCTTCTCCAATGCGATGGGTGTGGTACGCAGCCCCTTCGAGTACCCACAGTACTACCTGGCTGAGCCATG	2	2e-05	44GGTCGCCCGGCCTCAGTGAGCGAGCGAGCGCGCAGAGAGGGAGTGGCCA
GAATGGCACAGAAGGCCCTAACTTCTACGTGCCCTTCTCCAATGCGATGGGTGTGGTACGCAGCCCCTTCGAGTACCCACAGTACTACCTGGCTGAGCCATG	2	2e-05	38GGTCGCCCGACGCCCGGGCTTTGCCCGGGCGG72TCAGTGAGCGAGCGAGCGCGCAGAG98GGG
GAATGGCACAGAAGGCCCTAACTTCTACGTGTCCTTCTCCAATGCGATGGGTGTGGTACGCAGCCCCTTCGAGTACCCACAGTACTACCTGGCTGAGCCATG	2	2e-05	43G
GAACGGCACAG-AGGCCC-AA-TT-TATGTGCCCTTCTCCAA--CGA--GGCGTGGT--GCAGCCCCTTCGAG--CCCGCAGTACTACCTGGC-GA-CCATG	2	2e-05	15GC23TT45TCAC60GG75AG95GA
GAATGGCACAGAAGGCCCTAACTTCTACGTGCCCTGCTCCAATGCGATGGGTGTGGTACGCAGCCCCTTCGAGTACCCACAGTACTACCTGGCTGAGCCATG	2	2e-05	0
GCATGGCACAGAAGGCCCTAACTTCTACGTGCCCTTCTCCAA--CGATGGGTGTGGTACGCAGCCCCTTCGAGTACCCACAGTACTACCTGGCTGAGCCATG	2	2e-05	0
GAATGGCACAGAAGGCCCTAACCTCTACGTGCCCTTCTCCAATGGGATGGGTGTGGTACGCAGCCCCTTCGAGTACCCACAGTACTACCTGGCTGAGCCATG	2	2e-05	0
GAATGGCACAGAAGGCCCTAACTT--------------------CGATGGGTGTGGTACGCAGCCCCTTCGAGTACCCACAGTACTACCTGGCTGAGCCATG	2	2e-05	0
GAATGGCACAGAAGGCCCTAACTTCTACGTGCCCTTCTCCAATGCGATGGGTGTGGTACGCAGCCCCTTCGCGTACCCACAGTACTACCTGGCTGAGCCATG	2	2e-05	0
GAATGGCACAGAAGGCCCTAACTTCTACGTGCCCTTCTCCAATGCGATGGGTGTGGTACGCAGCCCCTTCGAGTACCCACAGTACTACCTGGCTGAGCCATG	2	2e-05	41GGTCGCCCGGCCTCAGTGAGCGAGCGAGCGCGCAGAGAGGG83G86GCCAACTCCATCAC
GAATGGCACAGAAGGCCCTAACTTCTACGTGCCCTTCTCCAATGCGATGGGTGTGGCACGCAGCCCCTTCGAGTACCCACAGTACTACCTGGCTGGGCCATG	2	2e-05	0
GAATGGCACAGAAGGCCCTAACTTCTACGTGCCCTTCTCCAAT--GATGGGTGTGGTACGCAGCCCCTTCGAGTGCCCACAGTACTACCTGGCTGAGCCATG	2	2e-05	0
GAATGGCACAGAAGGCCCTA------------------------CGATGGGTGTGGTACGCAGCCCCTTCGAGTACCCACAGTACTACCTGGCTGAGCCATG	2	2e-05	0
GAATGGCACAGAAGGCCCTAACTTCTACGTGCCCTTCTCCAATGCGATGGGTGTGGTACGCAGCCCCTTCGAGTACCCACAGTACTACCTGGCTGAGCCATG	2	2e-05	43GTTGGCCACTCCCTCTCTGCGCGCTCGCTCGCTCACTGAGGCCGGGC
GAATGGCACAGA-----------------------------------------------------------------------ACTACCTGGCTGAGCCATG	2	2e-05	0
GAATGGCACAGAAGGCCCTAACTTCTACGTGCCCTTCTCCAATGCGATGGGTGTGGTACGCAGCCCCTTCGAGTACCCACAGTACTACCTGGCTGAGCCATG	2	2e-05	43GCG
GAATGACACAGAAGGCCCTAACTTCTACGTGCCCTTCTCCAATG-GATGGGTGTGGTACGCAGCCCCTTCGAGTACCCACAGTACTACCTGGCTGAGCCATG	2	2e-05	0
GAATGGCACAGAAGGCCCTAACTTCTACGTGCCCTTCTCCAATGCGATGGGTGTGGTACGCAGCCCATTCGAGTACCCACAGTACTACCTGGCTGAGCCATG	2	2e-05	43G
GCATGGCACAGAAGGCCCTAACTTCTACGTGCCCTTCTCCACTGCGATGGGTGTGGTACGCAGCCCCTTCGAGTACCCACAGTACTACCTGGCTGAGCCATG	2	2e-05	0
GAATGGCACAGAAGGCCCTAACTTCTACGTGCCCTTCTCCAATGCGATGGGTGTGGTACGCAGCCCCTTCGAGTACCCACAGTACTACCTGGCT-AGCCATG	2	2e-05	92C
GAATGGCACAGAAGGCCCTAACTTCTACGTGCCCTTCTC---T-CGATGGGTGTGGTACGCAGCCCCTTCGAGTACCCACAGTACTACCTGGCTGAGCCATG	2	2e-05	0
GAATGGCACAGAAGGCCCTAACTTCTACGTGCCCTTCTCCAATGCGATGGG-GTGGTACGCAGCCCCTTCGAGTACCCACAGTACTACCTGGCTGAGCCATG	2	2e-05	0
GAATGGCACAGAAGGCCCTAACTTCTACGTGCCCTTCTCCAATGCGACGGGTGTGGTACGCAGCCCCTTCGAGTACCCACAGTACTATCTGGCTGAGCCATG	2	2e-05	0
GAATGGCACAGAAGGCCCTAACTTCTACTTGCCCTTCTCCAAT-CGATGGGTGTGGTACGCAGCCCCTTCGAGTACCCACAGTACTACCTGGCTGAGCCATG	2	2e-05	0
GAATGGCACAGAAGGCCCTAACTTCTACGTGCCCTTCTCCAA-GCGATGGGTGTGGTACGCAGCCCCTTCGAGTACCCGCAGTACTACCTGGCTGAGCCATG	2	2e-05	0
GAATGGCACAGAAGGCCCTAACTTCTACGTGCCCTTCTCCAATGCGATGGGTGTGGTACGCAGCCCCTTCGAGTACCCACAGGACTACCTGGCTGAGCCATG	2	2e-05	0
GAACGGCACAG-AGGCCC-AA-TT-TATGTGCCCTTCTCCAA--CGA--GGCGTGGT--GCAGCCCCTTCGAG----CACAGTACTACCTGGC-GA-CCATG	2	2e-05	14GC22TT44TCAC59GG75GCTG94GA
GAATGGCACAGAAGGCCCTAACTTCTACGTGCCCTTCTCCAA--------GTGTGGTACGCAGCCCCTTCGAGTACCCACAGTACTACCTGGCTGAGCCATG	2	2e-05	0
GAACGGCACAG-AGGCCC-AA-TT-TATGTGCCCTTCTCCAA--CGA--GGCGTGGT--GCAGCCCCTTCGAG--CCCGCAGTACTACCTG---GAGCCATG	2	2e-05	14GC22TT44TCAC59GG74AG94GAA
GAATGGCACAGAAGGCCCTAACTTCTACGTGCCCTTCTCCA-----------------------CCCTTCGAGTACCCACAGTACTACCTGGCTGAGCCATG	2	2e-05	0
GAATGGCACAGAAGGCCCTAACTTCTACGTGCCCTTCTCCAAT-CGATGGGTGTGGTACGCAGTCCCTTCGAGTACCCACAGTACTACCTGGCTGAGCCATG	2	2e-05	0
GAATGGCACAGAAGGCCCTAACTTCTACGTGCCCTTCTCCAATG-GATGGATGTGGTACGCAGCCCCTTCGAGTACCCACAGTACTACCTGGCTGAGCCATG	2	2e-05	0
GAATGGCACAGAAGGCCCTAACTTCTACGTGCCCTTCTC---------------------CAGCCCCTTCGAGTACCCACAGTACTACCTGGCTGAGCCATG	2	2e-05	0
GAATGGCATAGAAGGCCCTAACTTCTACGTGCCCTTCTCCAAT--GATGGGTGTGGTACGCAGCCCCTTCGAGTACCCACAGTACTACCTGGCTGAGCCATG	2	2e-05	0
GAACGGCACAG--GGCCCCAA-TT-TATGTGCCCTTCTCCAA--CGA--GGCGTGGT--GCAGCCCCTTCGAG--CCCGCAGTACTACCTGGC-GA-CCATG	2	2e-05	9GG22TT44TCAC59GG74AG94GA
GAATGGCACAGAAGGCCCTAACTTCTACGTGCCCTTCTCCAAT-CGATGGGTGTGGTACGCAGCCCCTTCGAGTACCCACAGTACTACCTGGCTGAGCTATG	2	2e-05	0
GAATGGCGCAGAAGGCCCTAACTTCTACGTGCCCTTCTCCAATGCGACGGGTGTGGTACGCAGCCCCTTCGAGTACCCACAGTACTACCTGGCTGAGCCATG	2	2e-05	0
#NAME?	2	2e-05	0
GAATGGCACAGAAGGCCCTAACTTCTACGTGCCCTTCTCCAAT--GATGGGTGTGGTACGCAGCCCCTTCGAGTACCCACAGCACTACCTGGCTGAGCCATG	2	2e-05	0
GAATGGCACAGAAGGCCCTAACTTCTACGTGCCCTTCTCCAATGCGATGGGTGTGGTACGCAGCCCCTTCGAGTACCCACAGTACTACCTGGCTGAGCCATG	2	2e-05	39TGGTCGCCCGGCCTCAGTGAGCGAGCGAGCGCG74GAGAGGG82G85GCCAA
GAATGGCACAGAAGGCCCTAACTTCTACGTGCCCTCCTCCAATGCGCTGGGTGTGGTACGCAGCCCCTTCGAGTACCCACAGTACTACCTGGCTGAGCCATG	2	2e-05	0
GAATGGCACAGAAGGCCCTAACTTCTACGTGCCCTTCTCCAA--CGATGGGTGTGATACGCAGCCCCTTCGAGTACCCACAGTACTACCTGGCTGAGCCATG	2	2e-05	0
GAATGGCACAGAAGGCCCTAACTTCTACGTGCCCTTCTCCAATGCGATGGGTGTGGTACGCAGCCCCTTCGAGTACCCACAGTACTACCTGGCTGAGCCATG	2	2e-05	42GGTCGCCCGGCCTCAGTGAGCGAGCGAGCGCGCAGAGAGGGAG87GCCAA
GAATGGCACAGAAGGCCCTAACTTCTATGTGCCCTTCTCCAAT-CGATGGGTGTGGTACGCAGCCCCTTCGAGTACCCACAGTACTACCTGGCTGAGCCATG	2	2e-05	0
GAATGGCACAGAAGGCCCTAACTTCTACGTGCCCTTCTCGAATGCGATGGGTGTGGTACGCAGCCCCTTCGAGTACCCACAGTACTACCTGGCTGAGCCATG	2	2e-05	0
GAATGGCACAGAAGGCCCTAACTTCTACGTGCCCTTCTCCAATGCGATGGGTGTGGTACGCAGCCCCTTCGAGTACCCACAGTACTACCTGGCTGAGCCATG	2	2e-05	41TGTCGCCCGGCCTCAGTGAGCGAGCGAGCGCGCAGAGAGGG83G85G
GAATGGCACACAAGGCCCTAACTTCTACGTGCCCTTCTCCAATGCGACGGGTGTGGTACGCAGCCCCTTCGAGTACCCACAGTACTACCTGGCTGAGCCATG	2	2e-05	0
GAATGGCACAGAAGGCCCTAACTTCTACGTGCCCTTCCCCAATGCGATGGGTGTGGTACGCAGCCCCTTCGAGTACCCACAGTACTACCTGGCTGAGCCATG	2	2e-05	43G
GAATGGCACAGAAGGCCCTAACTTCTACGTGCCCTTCTCCAATGCGATGGGTGTGGTACGCAGCCCCTTCGAGTACCCACAGTACTACCTGGCTGAGCCATG	2	2e-05	43TGCGCCCGGCCTCAGTGAGCGAGCGAGCGCGCAGAGAGGGAGTG88CCAA
GAATGGCACAGAAGGCCCTAACTTCTACGTGCCCTTCTCCAA--CGATGGGTGTGGTACGCAGTCCCTTCGAGTACCCACAGTACTACCTGGCTGAGCCATG	2	2e-05	0
GAATGGCACAGAAGGCCCTAACTTCTACGTGCCCTTCTCCAATGCGATGGGTGTGGTACGCAGCCCCTTCGAGTACCCACAGTACTACCTGGCTGAGCCAT-	2	2e-05	0
GAATGGCACAGACGGCCCTAACTTCTACGTGCCCTTCTCCAATGCGACGGGTGTGGTACGCAGCCCCTTCGAGTACCCACAGTACTACCTGGCTGAGCCATG	2	2e-05	0
GAATGGCACAGAAGGCCCTAACTTCTACGTGCCCTTCTCCAATGCGATGGGTGTGGTACGCAGCCCCTTCGAGTACCCACAGTACTACCTGGCTGAGCCATG	2	2e-05	50GTGT
GAATGGCACAGAAGGCCCTAACTTCTACGTGCCCTTCTCCAATGCGACGGGTGTGGTAAGCAGCCCCTTCGAGTACCCACAGTACTACCTGGCTGAGCCATG	2	2e-05	0
GAATGGCACAGAAGGCCCTAACTTCTACGTGCCCTTCTCCAATGCGATGGGTGTGGTACGCAGCCCCTTCGAGTACCCACAGTACTACCTGGCTGAGCCATG	2	2e-05	44CCTTTGGTCGCCCGGCCTCAGTGAGCGAGCGAGCGCGCAGAGAGGGAGTGGCCA
GAATGGCACAGAAGGCCCTAACTTCTACGGGCCCTTCTCCAAT-CGATGGGTGTGGTACGCAGCCCCTTCGAGTACCCACAGTACTACCTGGCTGAGCCATG	2	2e-05	0
GAATGGCACAGAAGGCCCTAACTTCTACGTGCCCTTCTCCAATGCGATGGGTGTGGTACGCAGCCCCTTCGAGTACCC--AGTACTACCTGGC-GA-CCATG	2	2e-05	75G78G94GA
GAATGGCACAGAAGGCCCCAACTTCTACGTGCCCTTCTCCAAT-CGATGGGTGTGGTACGCAGCCCCTTCGAGTACCCACAGTACTACCTGGCTGAGCCATG	2	2e-05	0
GAATGGCACAGAAGGCGCTAACTTCTACGTGCCCTTCTCCAATGCGATGGGTGTGGTACGCAGCCCCTTCGAGTACCCACAGTACTACCTGGCTGAGCCATG	2	2e-05	0
GAATGGCACAGAAGGCCCTAACTTCTACGTGCCCTTCTCCGATGCGATGGGTGTGGTACGCAGCCCCTTCGAGTACCCACAGTACTACCTGGCTGAGCCATG	2	2e-05	43G
GAATGGCACAGAAGGCCCTAACTTCTACGTGCCCTTCTCCAATGCGATGGGTGTGGTACGCAGCCCCTTCGAGTACCCACAGTACTACCTGGCTGAGCCATG	2	2e-05	44CCCGGGCGTCGGGCGACCTTTGGTCGCCCGGCCTCAGTGAGCGAGCGAGCGCGCAGAGAGGGAGTGGCCAA
GAATGGCACAGAAGGCCCTAACTTCTACGTGCCCTTCTCCAATGCGATGGGTGTGGTACGCAGCCCCTTCGAGTACCCACAGTACTACCTGGCTGAGCCATG	2	2e-05	44AC
GAATGGCACAGAAGGCCCTAACTTCTACATGCCCTTCTCCAAT--GATGGGTGTGGTACGCAGCCCCTTCGAGTACCCACAGTACTACCTGGCTGAGCCATG	2	2e-05	0
GAATGGCACAGAAGGCCCTAACTTCTACGTGCCCTTCTCC-ATGCGATGGGTGTGGTACGCAGCCCCTTCGAGTACCCACAGTACTACCTGGCTGAGCCATG	2	2e-05	38CCGG45CTCCCTCTC58CGCTCGCTCGCTC72C74GAGGCC
GAATGGCACAGAAGGCCCTAACTTCTACGTGCCCTTCTCCAATGCGATGGGTGTGGTACGCAGCCCCTTCGAGTACCCACAGTACTACCTGGCAGAGCCATG	2	2e-05	0
GAATGGCACAGCAGGCCCTAACTTCTACGTGCCCTCCTCCAATGCGATGGGTGTGGTACGCAGCCCCTTCGAGTACCCACAGTACTACCTGGCTGAGCCATG	2	2e-05	0
GAATGGCACAGAAGGCCCTAACTTCTACGTGCCCTTCTCCAATGCGACGGGTGTGGTACGCAGCCCCTTCGAGTACCCACAGTACTACCTGGCTGATCCATG	2	2e-05	0
GAATGGCACAGAAGGCCCTAACTTCTACGTGCCCATCTCCAATGCGACGGGTGTGGTACGCAGCCCCTTCGAGTACCCACAGTACTACCTGGCTGAGCCATG	2	2e-05	0
GAATGGCACAGAAGGCCCTAACTTCTACGTGCCCTTCTCCAATGCGATGGGTGTGGTACGCAGCCCCTTCGAGTACCCACAGTACTACCTGGCTGAGCCATG	2	2e-05	44TTGGTCGCCCGGCCTCAGTGAGCGAGCGAGCGCGCAGAGAGGGAGTGGCCAACTCC
GAATGGCACAGAAGGCCCTAACTTCTACGTGCCCTTCTCCAATGCGACGGGTGTGATACGCAGCCCCTTCGAGTACCCACAGTACTACCTGGCTGAGCCATG	2	2e-05	0
GAATGGCACAGAAGGCCGTAACTTCTACGTGCCCTTCTCCAATGCGATGGGTGTGGTACGCAGCCCCTTCGAGTACCCACAGTACTACCTGGCTGAGCCATG	2	2e-05	0
GAATGGCACAGAAGGCCCTAACTTCTACGTGCCCTTCTCCAATGCGACGGGTGTGGTACGCAGCCCCTTCGAGTATCCACAGTACTACCTGGCTGAGCCATG	2	2e-05	0
GAATGGCACAGAAGGCCCTAACTTCTACGTGCCCTTCTCCAAT-CTATGGGTGTGGTACGCAGCCCCTTCGAGTACCCACAGTACTACCTGGCTGAGCCATG	2	2e-05	0
GAATGGCACAGAAGGCCCTAACTTCTGCGTGCCCTTCTCCAATGCGACGGGTGTGGTACGCAGCCCCTTCGAGTACCCACAGTACTACCTGGCTGAGCCATG	2	2e-05	0
GAATGGCACAGAAGGCCCTAACTTCTACGTGCCC-TCTCCAATGCGATGGGTGTGGTACGCAGCCCCTTCGAGTACCCACAGTACTACCTGGCTGAGCCATG	2	2e-05	32CCGGGCGG44AG47GAGCGAGCGAGCG61G64GAGAGGG72G75GC
GAATGGCACAGAAGGCCCTAACTTCTACGTGCCCTTCTCCAA--CGATGGGTGTGGTACGTAGCCCCTTCGAGTACCCACAGTACTACCTGGCTGAGCCATG	2	2e-05	0
GAACGGCACAG-AGGCCC-AA-TT-TATGTGCCCTTCTCCAA--CGA--GGCGTGGT--GCAGCCCCTTCGAG--CCCACAGTACTACCTGGCTGAGCCATG	2	2e-05	14GC22TT44TCAC59GG74AG
GAATGGCACAGAAGGCCCTAACTTCTACGTGCCCTTC-----TGCGATGGGTGTGGTACGCAGCCCCTTCGAGTACCCACAGTACTACCTGGCTGAGCCATG	2	2e-05	0
GAACGGCACAGAAGGCCCTAACTTCTACGTGCCCTTCTCCAAT-CGATGGGTGTGGTACGCAGCCCCTTCGAGTACCCACAGTACTACCTGGCTGAGCCATG	2	2e-05	0
GAATGGCACAGAAGTCCCTAACTTCTACGTGCCCTTCTCCAATG-GATGGGTGTGGTACGCAGCCCCTTCGAGTACCCACAGTACTACCTGGCTGAGCCATG	2	2e-05	0
GAATGGCACAGAAGGCCCTAACTTCTACGTGCCCTTCTCCAATGCGATGGGTGTGGTACGCAGCCCCTTCGAGTACCCACAGTACTACCGGGCTGAGCCATG	2	2e-05	0
GAATGGCACAGAAGGCCCTAACTTCTACGTGCCCTTCTCCAATGCGACGGGTGTGGTACGCAGCCCCGTCGAGTACCCACAGTACTACCTGGCTGAGCCATG	2	2e-05	0
GAATGGCACAGAAGGCCCTAACTTCTACGTGCCCTTCTCCAATGCGACGGGTGTGGTACGCAGCCCCTTCGAGTACCCACAGTACTACCTGACTGAGCCATG	2	2e-05	0
GAATGGCACAGAAGGCCCTAACTTCTACGTGCCCTTCTCCAAT-CGATGGGTGTGGTAAGCAGCCCCTTCGAGTACCCACAGTACTACCTGGCTGAGCCATG	2	2e-05	0
GAACGGCACAG-AGGCCC-AA-TT-TATGTGCCCTTCTCCAA--CGA-GGGTGTG---CGGAGCCCCTTCGAG--CCCGCAGTACTACCTGGC-GA-CCATG	2	2e-05	14GC22TT44TCAC51C53T74AG94GA
GAATGGCACAGAAGGCCCTAACTTCTACGTGCCCTTCTCCAAT--GATGGGTGTGGTACGCAGCCCCTTCGAGTACCCACAGTACTACCTGGCTGGGCCATG	2	2e-05	0
GAATGGCACAGAAGGCCCTAACTTCTACGTGCCCTTC---------------GTGGTACGCAGCCCCTTCGAGTACCCACAGTACTACCTGGCTGAGCCATG	2	2e-05	0
GAATGGCACAGAAGGCCCTAACTTCTACGTGCCCTTCTCCAATGCGATGGGTGTGGTACGGAGCCCCTTCGAGTACCCACAGTACTACCTGGCTGAGCCATG	2	2e-05	0
GAATGGCACAGAAGGCCCTAACTTCTACGTGCCCTTC-----------------GGTACGCAGCCCCTTCGAGTACCCACAGTACTACCTGGCTGAGCCATG	2	2e-05	0
GAATGGCACAGAAGGCCCTAACTTCTACGTGCCCTTCTCCAAT-CGATGGGAGTGGTACGCAGCCCCTTCGAGTACCCACAGTACTACCTGGCTGAGCCATG	2	2e-05	0
GAATGGCACAGAAGGCCCTAACTTCTACGTGCCCTTCTCCAAT-CGATGGGTGTGGTACGCAGCCCCCTCGAGTACCCACAGTACTACCTGGCTGAGCCATG	2	2e-05	0
GAATGGCACAGAAGGCCCTAACTTCTACGTGCCCTTCTCCAATGCGACGGGTGTGGTACGCAGCCCCTTCGAGTACCCACAGTACTACCTGGCTGAGCCATG	2	2e-05	43G
GAATGGCACAGAAGGCCCTAACTTCTACGCGCCCTTCTCCAAT--GATGGGTGTGGTACGCAGCCCCTTCGAGTACCCACAGTACTACCTGGCTGAGCCATG	2	2e-05	0
GAATGGCACAGAAGGCCCTAACTTCTACGTGCC-----CC----CGATGGGTGTGGTACGCAGCCCCTTCGAGTACCCACAGTACTACCTGGCTGAGCCATG	2	2e-05	0
GAATGGCACAGAAGGCCTTAACTTCTACGTGCCCTTCTCCAATGCGACGGGTGTGGTACGCAGCCCCTTCGAGTACCCACAGTACTACCTGGCTGAGCCATG	2	2e-05	0
GAATGGCACAGGAGGCCCTAACTTCTACGTGCCCTTCTCCA---CGATGGGTGTGGTACGCAGCCCCTTCGAGTACCCACAGTACTACCTGGCTGAGCCATG	2	2e-05	0
GAATGGCACAGAAGGCCCTAACTTCTACGTGCCCTTCTCCA---CGACGGGTGTGGTACGCAGCCCCTTCGAGTACCCACAGTACTACCTGGCTGAGCCATG	2	2e-05	0
GAATGGCACAGAAGGCCCTAACTTCTACGTGCCCTTCTCCAATTCGACGGGTGTGGTACGCAGCCCCTTCGAGTACCCACAGTACTACCTGGCTGAGCCATG	2	2e-05	0
GAATGGCACAGAAGGCCCTAACTTCTACGTGCCCTTCTCCAATG-GATGGGTGTGGTACGCAGTCCCTTCGAGTACCCACAGTACTACCTGGCTGAGCCATG	2	2e-05	0
GAATGGCACAGAAGGCCCTAACTTCTACGTGCCCTTCGCCAATGCGATGGGTGTGGTACGCAGCCCCTTCGAGTACCCACAGTACTACCTGGCTGAGCCATG	2	2e-05	0
GAATGGCACAGAAGGCCCTAACTTCTACGTGCCCTTCTCCAATGCGACGGGTGTGGTACGCAGCCCCTTCGAGTACCCACAGTACTACCTGACTGAACCATG	2	2e-05	0
GAATGGCACAGAAGGCCCTAACTTCTACGTGCCCTTCTCCA-------------GGT-CGCAGCCCCTTCGAGTACCCACAGTACTACCTGGCTGAGCCATG	2	2e-05	0
GAATGGCACAGAAGGCCCTAACTTCTACGTGCCCTTCTCCAAT-CGATGGGTGTGGTGCGCAGCCCCTTCGAGTACCCACAGTACTACCTGGCTGAGCCATG	2	2e-05	0
GAATGGCACAGAAGGCCCTAACTTCTACGTGCCCTTCTCCAATGCGATGGGTGTGGTACGCAGCCCCTTCGAGTACCCACAGTACTACCTGGCTGAGCCATG	2	2e-05	44TCGCCCGGCCTCAGTGAGCGAGCGAGCGCGCAGAGAGGGAGTGGCCAA
GAATGGGACAGAAGGCCCTAACTTCTACGTGCCCTTCTCCAATGCGATGGGTGTGGTACGCAGCCCCTTCGAGTACCCACAGTACTACCTGGCTGAGCCATG	2	2e-05	0
GAATGGCACAGAAGGCCCTAACTTCTACGTGCCCTTCTCCAATG-GA--------------AGCCCCTTCGAGTACCCACAGTACTACCTGGCTGAGCCATG	2	2e-05	0
GAACGCCACAG-AGGCCC-AA-TT-TATGTGCCCTTCTCCAA--CGA--GGCGTGGT--GCAGCCCCTTCGAG--CCCGCAGTACTACCTGGC-GA-CCATG	2	2e-05	14GC22TT44TCAC59GG74AG94GA
GAATGGCACAGAAGGCCCTAACTTCTACGTGCCCTTCTCCAATGCGATGGGCGTGGTACGCAGCCCCTTCGAGTACCCACAGTACTACCTGGCTGAGCCATG	2	2e-05	43G
GAATGGCACAGAAGGCCCTAACTTCTACGTGCCCTTCTCCAATG-GATGGGTGTGATACGCAGCCCCTTCGAGTACCCACAGTACTACCTGGCTGAGCCATG	2	2e-05	0
GAATGGCACAGAAGGCCCTAACTTCTACGTGTCCTTCTCCAAT--GATGGGTGTGGTACGCAGCCCCTTCGAGTACCCACAGTACTACCTGGCTGAGCCATG	2	2e-05	0
GAATGGCACAGAAGGCCCTAACTTCTACGTGCCCTTC------G-GATGGGTGTGGTACGCAGCCCCTTCGAGTACCCACAGTACTACCTGGCTGAGCCATG	2	2e-05	0
GAATGGCACAGAAGGCCCTAACTTCTACGTGCC-----------CGATGGGTGTGGTACGCAGCCCCTTCGAGTACCCACAGTACTACCTGGCTGAGCCATG	2	2e-05	0
#NAME?	2	2e-05	0
GAATGGCACAGAATGCCCTAACTTCTACGTGCCCTTCTCCAATGCGACGGGTGTGGTACGCAGCCCCTTCGAGTACCCACAGTACTACCTGGCTGAGCCATG	2	2e-05	0
GAATGGCACAGAAGGCCCTAACTTCTACGTGCCCTTCTCCAATG-GATGGGTGTGGTACGCAGCCCCTTCGAGTACCCACAGTACTCCCTGGCTGAGCCATG	2	2e-05	0
GAATGGCACAGAAGGCCCTAACTTCTACGTGCCCTTCTCCAATGCCATGGGTGTGGTACGCAGCCCCTTCGAGTACCCACAGTACTACCTGGCTGAGCCATG	2	2e-05	47CTCCCTCTC58CGC62CTC66C68C70CTCAC77AGGCCGCCCGGGCAAA
GAATGGCACAGAAGGCCCTAACTTCTACGTGCCCTTCTCCAATGCGATCGGTGTGGTACGCAGCCCCTTCGAGTACCCACAGTACTACCTGGCTGAGCCATG	2	2e-05	0
GAATGGCACAGAAGGCCCTAACTTCTACGTGCCGTTCTCCAATGCGATGGGTGTGGTACGCAGCCCCTTCGAGTACCCACAGTACTACCTGGCTGAGCCATG	2	2e-05	0
GAATGGCACAGAAGGCCCTAACTTCTACGTGCCCTTCTCCA---CGATGGGTGTGGTACGCAGCCCCTTCGAGTACCCACAGTACTACCTGGCTGAGCCATG	2	2e-05	40G
GAATGGCACAGAAGGCCCTAACTTCTACGTGCCCTTCTCCAATGCGATGGGTGTGGTACGCAGCCCCTTCGAGTACCCACAGTACTACCTGGCTGAGCCATG	2	2e-05	44AATGCCGTGTTTATCTCGTCAACTTGTTGGCGAGATTTTTGCGGCCGCAGGAACCCCTAGTGATGGAGTTGGCCACTCCCTCTCA
GAATGGCACAGAAGGCCCTAACTTATACGTGCCCTTCTCCAATGCGACGGGTGTGGTACGCAGCCCCTTCGAGTACCCACAGTACTACCTGGCTGAGCCATG	2	2e-05	0
GAATGGCACAGAAGGCCCTAACTTCTACGTGCC-----------------GTGTGGTACGCAGCCCCTTCGAGTACCCACAGTACTACCTGGCTGAGCCATG	2	2e-05	0
GAATGGCACAGAAGGCCCTTACTTCTACGTGCCCTTCTCCAATGCGATGGGTGTGGTACGCAGCCCCTTCGAGTACCCACAGTACTACCTGGCTGAGCCATG	2	2e-05	0
GAACGGCACAG-AGGCCC-AA-TT-TATGTGCCCTTCTCCAA--CGA--GGCGTGGT--GCAGCCCCTTCGAG--CCCGCGGTACTACCTGGC-GA-CCATG	2	2e-05	14GC22TT44TCAC59GG74AG94GA
GAATGGCACAGAAGGCCCTAACTTCTACGTGCCCTTCTCCAATGCGACGGGTGTGGTACGCAGCCCCTTCGAGTACCCACAGTACTACCTGGCTGTGCCATG	2	2e-05	0
GAATGGCACAGAAGGCCCTAACTCCTACGTGCCCTTCTCCAATGCGATGGGTGTGGTACGCAGCCCCTTCGAGTACCCACAGTACTACCTGGCTTAGCCATG	2	2e-05	0
GAATGGCACAGAAGGCCCTAAATTCTACGTGCCCTTCTCCAATGCGACGGGTGTGGTACGCAGCCCCTTCGAGTACCCACAGTACTACCTGGCTGAGCCATG	2	2e-05	0
GAATGGCACAGAAGGCCCTAACTTCTACGTGCCCTTCTCCAATGCGATGGGTGTGGTACGCAGCCCCTTCGAGTACCCACAGTAGTACCTGGCTGAGCCATG	2	2e-05	0
GAATGGCACAGAAGGCCCTAACTTCTACGTGCCCTTCTCCAGTGAGATGGGTGTGGTACGCAGCCCCTTCGAGTACCCACAGTACTACCTGGCTGAGCCATG	2	2e-05	0
GAATGGCACAGAAGGCCCTAACTTCTACGTGCCCTTCTCCAATGCGATGGGTGTGGTACGCAGCCCCTTCGAGTACCCACAGTACTACCTGGCTGAGCCATG	2	2e-05	44TTGGCCACTCCCTCTCTGCGCGCTCGCT74CTC78C80GAGGCCGCCCGGGCAAAGCCCG
GAACGGCACAG-AGGCCC-AA-TT-TATGTGCCCTTCTCCAA--CGA--GGCGTGGT--GCAGCCCCTTCGAG--CCCGCAGTACTACCTGGC-GA-CCATG	2	2e-05	14GC22TT44TCAC59AG74AG94GA
GAATGGCACAGAAGGCCCTAACTTCTATGTGCCCTTCTCCAAT--GATGGGTGTGGTACGCAGCCCCTTCGAGTACCCACAGTACTACCTGGCTGAGCCATG	2	2e-05	0
GAATGGCACAGAAGGCCCTAACTTCTACGTGCCCTTCTC----GCGATGGGTGTGGTACGCAGCCCCTTCGAGTACCCACAGTACTACCTGGCTGAGCCATG	2	2e-05	0
GAATGGCACAGAAGGCCCTAACTTCTACGTGCCCTTCTCCAAT-CGATGGGTGGGGTACGCAGCCCCTTCGAGTACCCACAGTACTACCTGGCTGAGCCATG	2	2e-05	0
GAATGGCACAGAAGGCCCTAACTTCTACGTGCCCTTCTCCAATGCGACGGGTGTGGTACGCAGCCCCTTCGAGTACCCACAGCACTACCTGGCTGAGCCATG	2	2e-05	0
GAACGGCACAG-AGGCCC-AA-TT-TATGTGCCCTTCTCCAA--C-ATGGG--TGGT--GCAGCCCCTTCGAG--CCCGCAGTACTACCTGGC-GA-CCATG	2	2e-05	14GC22TT45CACA51C59GG74AG94GA
GAATGGCACAGAAGGCCCTAACTTCTACGTGCCCTTCTCCAATGCGATGGGTGTGGTACGCAGCCCCTTCGAGTACCCACAGTACTACCTGGCTGAGCCATG	2	2e-05	44GATTTTTTGCGGCCGCAGGAACCCCTAGTGATGGAGTTGGCCACTCCCTCTCTGCGCGCTCGCTCGCTCACTGAGGC
GAATGGCACAGAAGGCCCTAACTTCTACGTGCCCTTCTCCAA--CGATGGGTGTGGTACGCAGCCCCTTCGAGTACCCACAGTACTACCTGGCTGAGTCATG	2	2e-05	0
GAATGGCACAGAAGGCCCTAACTTCTACGTGCCCTTCTCCAATGCGATGGGTGTGGTACGCAGCCCCTTCGAGTACCCACAGTACTACCTGGCTGAGCCATG	2	2e-05	44GTCC
GCATGGCACAGAAGGCCCTAACTTCTACGTGCCCTTCTCCAAT-CGATGGGTGTGGTACGCAGCCCCTTCGAGTACCCACAGTACTACCTGGCTGAGCCATG	2	2e-05	0
GAATGGCACAGAAGGCTCTAACTTCTACGTGCCCTTCTCCAA--CGATGGGTGTGGTACGCAGCCCCTTCGAGTACCCACAGTACTACCTGGCTGAGCCATG	2	2e-05	0
GAATGGCACAGAAGGCCCTAACTTCTACGTGCCCTTCTCCAATGCGACGGGTGTGGTACGCAGCCCCTTCGAGTACCCACAGTACTACCTGGCTGAGCCATG	2	2e-05	67T
GCATGGCACAGAAGGCCCTAACTTCTACGTGCCCTTCTCCAATGCGACGGGTGTGGTACGCAGCCCCTTCGAGTACCCACAGTACTACCTGGCTGAGCCATG	2	2e-05	0
GAATGGCATAGAAGGCCCTAACTTCTACGTGCCCTTCTCCAATGCGACGGGTGTGGTACGCAGCCCCTTCGAGTACCCACAGTACTACCTGGCTGAGCCATG	2	2e-05	0
GACTGGCACAGAAGGCCCTAACTTCTACGTGCCCTTCTCCAA--CGATGGGTGTGGTACGCAGCCCCTTCGAGTACCCACAGTACTACCTGGCTGAGCCATG	2	2e-05	0
GAATGGCACAGAAGGCCCTAACTTCTACGTGCCCTTCTCCAA--C----------GTACGCAGCCCCTTCGAGTACCCACAGTACTACCTGGCTGAGCCATG	2	2e-05	0
GAATGGCACAGAAGCCCCTAACTTCTACGTGCCCTTCTCCAATGCGATGGGTGTGGTACGCAGCCCCTTCGAGTACCCACAGTACTACCTGGCTGAGCCATG	2	2e-05	0
GAATGGCACAGAAGGCCCTAACATCTACGTGCCCTTCTCCAATGCGATGGGTGTGGTACGCAGCCCCTTCGAGTACCCACAGTACTACCTGGCTGAGCCATG	2	2e-05	0
GAATGGCACAGAAGGCCCTAACTTCTACGTGCCCTTCTCCAAT-CGATGGGTGTGGTACGCAGCCCCTTCGAGTACCCACAGTACTACCTGGCTGAGCCATA	2	2e-05	0
GAATGGCACAGAAGGCCCTAACTTCTACGTGCCCTTGTCCAATGCGATGGGTGTGGTACGCAGCCCCTTCGAGTACCCACAGTACTACCTGGCTGAGCCATG	2	2e-05	0
GAATGGCACAGAAGGCCCTAACTTCTACGTGCCCTTCTCCAATGCGATGGGTGTGGTACGCAGCCCCTTCGAGTACCCACAGTACTACCTGGCTGAGCCATG	2	2e-05	34TGGTCGCCCGACGCCCGGGCT57GCCCGGGCGGC71AGTGAGCGAGCGAGCGCG91GAGAGGG99G
GAATGGCACAGAAGGCCCTAACTTCTACGTGCCCTTCTCCAATGCGACGGGTGTGGTACGCAGCCCCTTCGAGCACCCACAGTACTACCTGGCTGAGCCATG	2	2e-05	0
GAATGGCACAGAAGGCCCTAACTTCTACGTGCCCTTCTCCAATGCGATGGGTGTGGTACGCAGCCCCTTCGAGTACCCACGGTACTACCTGGCTGAGCCATG	2	2e-05	43G
GAATGGCACAGACGGCCCTAACTTCTACGTGCCCTTCTCCAATGCGATGGGAGTGGTACGCAGCCCCTTCGAGTACCCACAGTACTACCTGGCTGAGCCATG	2	2e-05	0
GAATGGCACAGAAGGCCCTAACTTCTACGTGCCCCTCTCCAA--CGATGGGTGTGGTACGCAGCCCCTTCGAGTACCCACAGTACTACCTGGCTGAGCCATG	2	2e-05	0
GAATGGCACAGAAGGCCCTAACTTCTACGTGCCCTTCTC--A--CGATGGGTGTGGTACGCAGCCCCTTCGAGTACCCACAGTACTACCTGGCTGAGCCATG	2	2e-05	37T
GAATGGCACAGAAGGCCCTAACTTCTACGTGCCCTTCTCCAATGCGATGGGTGTGGTACGCAGCCCCTTCGAGTACCCACAGTACTACCTGGCTGAGCCATG	2	2e-05	41CCGGGCTTTGGTCGCCCGCCCGGGCGTCCTCAGTGAGCGAGCGAGCGCGCAGAGAGGG100G
GAATGGCACAGAAGGCCCTAACTTCTACGTGCCCTTC-CC----------------TACGCAGCCCCTTCGAGTACCCACAGTACTACCTGGCTGAGCCATG	2	2e-05	0
GAATGGCACAGAAGGCCCTAACTTCTACGTGCCCTTCTCCAATG-GATGGGGGTGGTACGCAGCCCCTTCGAGTACCCACAGTACTACCTGGCTGAGCCATG	2	2e-05	0
GAATGGCACAGAAGGCCCTAACTTCTACGTGCCCTTCTTCAAT-CGATGGGTGTGGTACGCAGCCCCTTCGAGTACCCACAGTACTACCTGGCTGAGCCATG	2	2e-05	0
GAATGGCACAGAAGGCCCTAACTTCTACGTGCCCTT-------------------G--CGCAGCCCCTTCGAGTACCCACAGTACTACCTGGCTGAGCCATG	2	2e-05	0
GAATGGCACAGAAGGCCCTAACTTCTACGTGCCCTTCTC---------------GGTACGCAGCCCCTTCGAGTACCCACAGTACTACCTGGCTGAGCCATG	2	2e-05	0
GAATGGCACAGAAGGCCCTAACTTCTACGTGCCCTTCTCCAATGCGATGGGTGTGGTACGCAGCCCCTTCGAGTACCCACAGTACTACCTGGCTGAGCCATG	2	2e-05	43GTGGCCACTCCCTCTCTGCGCGCTCGCTCGCTCACTGAGGCCGG90ACC
GAATGGCACAGAAGGCCCTAACTTCTACGTGCCCTTCTCCAAT------GGTGCGGTACGCAGCCCCTTCGAGTACCCACAGTACTACCTGGCTGAGCCATG	1	1e-05	0
GAATGGCACAGAAGGCCCTAACTTCTACGTGCCCTTCTCCAATG-GATGGGTGTGGTACGCAGCCCCTTCGAGTACCCACTGTACTACCTGGCTGAGCCATG	1	1e-05	0
GAATGGCACAGCAGGCCCTAACTTCTACGTGCCCTTCTCCAATGCGATGGGTGTGGTACGCAGCCCCTTCGAGTACACACAGTACTACCTGGCTGAGCCATG	1	1e-05	0
GAATGGCACAGAAGGCCCTAACTTCTACGTGCCCTTCTCCAATGCGATGGGTGTGGTACGCAGCCCCTTCGAGTACCCACAGTACTACCTGGCTGGGCCATG	1	1e-05	44A
GAATGGCACAGAAGGTCCTAACTTCTACGTGCCCTTCTCCA---CGATGGGTGTGGTACGCAGCCCCTTCGAGTACCCACAGTACTACCTGGCTGAGCCATG	1	1e-05	0
GAATGGCACAGAAGGCCCTAACTTCTACGTGCCCTTCTCCAATGCGATGGGTGTGGTACGCAGCCCCTTCGAGTACCCACAGTGCTACCTGACTGAGCCATG	1	1e-05	0
GAATGGCACAGAAGGCCCTAACTTCTACGTGCCCTTCTCCAAT-CGATGGGTGTGGTACGCAGCCCCTTCGAGTACCCACAGTACTACCTGGC-GA-CCATG	1	1e-05	93GA
GAATGGCACAGAAGTCCCTAACTTCTACGTGCCCTTCTCCAA--CGATGGGTGTGGTACGCAGCCCCTTCGAGTACCCACAGTACTACCTGGCTGAGCCATG	1	1e-05	0
GAATGGCACAGAAGGCCCTAACTTCTACGTGCCCTTCTCCAATGCGATGGGTGTGGTACGCAGCCCCTTCGAGTACCCACAGTACTACCTGGCTGAGCCATG	1	1e-05	44TGCGCGCTCGCTCGCTCACTGAGGC
GAACGGCACAG-AGGCCC-AA-TT-TA--TGCCCTTCTCCAA--CGA--GGCGTGGT--GCAGCCCCTTCGAG--CCCGCAGTACTACCTGGC-GA-CCATG	1	1e-05	13GC21TT28TA43TCAC58GG73AG93GA
GAATGGCACAGAAGGCCCTAACTTCTACGTGCCCTTCTCCAATGCGACGGGTGTGGTACGCAGCCCCTTCGAGTACCCACATTACTACCTGGCTGAGCCATG	1	1e-05	0
GAATGGCACAGAAGGCCCTAACTTCTACGTGCCCTTCTCCAATGCGATGGGTGTGGTACGCAGCCCCTTCGAGTACCCACAGTACTACCTGGCTGAGCCATG	1	1e-05	44CGGGCGTCGGGCGACCTTTGGTCGCCCGGCCTCAGTGAGCGAGCGAGCGCGCAGAGAGGGAGTGGCCA
GAATGGCACAGAAGGCCCTAACTTCTACGTGCCCTTCTCCAATGCGATGGGCGTGGTACGCAGCCCCTTCGAGTACCCACAGTACTACCTGGCTGAGCCATA	1	1e-05	0
GAATGGCACAGATGGCCCTAACTTCTACGTGCCCTTCTCC----CGATGGGTGTGGTACGCAGCCCCTTCGAGTACCCACAGTACTACCTGGCTGAGCCATG	1	1e-05	0
GAATGGCACAGAAGGCCCTAACTTCTACGTGCCCTTCTCCAAT--GATGGGTGTGGTACGCAGCCCCTTCGAGTACCCACAGTACTACCTGGCTGAGCCATG	1	1e-05	65A
GAATGGCACAGAAGGCCCTAACTTCTACGTGCCCTTCTCCAATG---TGGGTGTGGTACGCAGCCCCTTCGAGTACCCACAGTACTACCTGGCTGTGCCATG	1	1e-05	0
GAATGGCACAGAAGGCCTTAACTTCTACGT-CCCTTCT-CAAAGCGATGGGTGTGGTACGCAGCCCCTTCGAGTACCCACAGTACTACTTGGCTGAGCCATG	1	1e-05	35C43C
GAAAGGCACAGAAGGCCCTAACTTCTACGTGCCCTTCTCCAATGCGATGGGTGTGGTACGCAGCCCCTTCGAGTACCCACAGTACTACCTGGCTGACCCATG	1	1e-05	0
GAATGGCACAGAAGGCCCTAACTTCTACGTGCCCTTCTCC---GCGATGGGTGTGGCACGCAGCCCCTTCGAGTACCCACAGTACTACCTGGCTGAGCCATG	1	1e-05	38C
GAATGGCACAGAAGGCCCTAACTTCTACGTGCCCTTCT------CGATGGGTGTGGTACGCAGCCCCTTCGAGTACCCACAGTACTAACTGGCTGAGCCATG	1	1e-05	0
GAATGGCACAGAAGTCCCTAACTTCTACGTGCCCTTCTCCAATGCGATAGGTGTGGTACGCAGCCCCTTCGAGTACCCACAGTACTACCTGGCTGAGCCATG	1	1e-05	0
GAATGGCACAGAAGGCCCTAACTTCTACGTGCCCTTCTCCAATGCGATGGGTGTGGTACGCAGCCCCTTCGAGTACTCACAGTACTACCTGGCTGAGCCGTG	1	1e-05	0
GAATGGTACAGAAGGCCCTAACTTCTACGTGCCCTTCTCCAAT--GATGGGTGTGGTACGCAGCCCCTTCGAGTACCCACAGTACTACCTGGCTGAGCCATG	1	1e-05	0
GAAGGGCACAGAAG---------T-TA-G-GGCCTTCTCCAATGCGATGGGTGTGGTACGCAGCCCCTTCGAGTACCCACAGTACTACCTGGCTGAGCCATG	1	1e-05	9GT33G
GAATGGCACAGAAGGCCCTAACTTCTACGTGTCCTTCTCCAAT-------GTGTGGTACGCAGCCCCTTCGAGTACCCACAGTACTACCTGGCTGAGCCATG	1	1e-05	0
GAATGGCACAGAAGGCCCTAACTTCTACGTGCCCTTC-------C-ATGGGTGTGGTACGCAGCCCCTTCGAGTACCCACAGTACTACCTGGCTGAGCCATG	1	1e-05	0
GAATGGCACAGAAGGCCCTAACTTCTACGTGCCCTTCTCCAAT-CGATGGGTGTGGTACGCAGCCCCTTCGAGTACCCACATTACTACCTGGCTGAGCCATG	1	1e-05	0
GAATGGCACAGAAGGCCCTAACTTCTACGAGCCCTTCTCCAATGCGATGGGTTTGGTACGCAGC--CTTCGAGTACCCACAGTACTACCTGTCTGAGCCATG	1	1e-05	63TT
GAATGGCACAGAAGG-CCTAACTTCTACGTGCCCTTTTCCAATGCGATGGGTGTGGTACGCAGCCCCTTCGAGTACCCACAGTACTACCTGGCTGAGCCATG	1	1e-05	0
GAATGGCACAGAAGGCCCTAACTTCTACGTGCCCTTCTCCAATGCGATGGGTGTGGTACGCAGCCCCTCCGAGTACCCACAGTACTACCTGGCTGAGTCATG	1	1e-05	0
GAATGGCACAGAAGGCCCTAACTTCTACGTGCCCTTCTCCAATGCGATGGGTGTGGTACGCAGCCCCTTCAAGTACCCACAGTACTACCTGGCTGAGCCATG	1	1e-05	44C
GAATGGCACAGAAGGCCCTAACTTCTACGTGCCCTTCTCCAATGCGATGGGTGTGGTACGCAGCCCCTTCAAGTACCCACAGTACTACCTGGCTGAGCCATG	1	1e-05	44A
GAATGGCACAGGAGGCCCTAACTTCTACGTGCCCTTCTCCAAT-CGATGGGTGTGGTACGCAGCCCCTTCGAGTACCCACAGTACTACCTGGCTGAGCCATG	1	1e-05	0
GAATGGCACGGAAGGCCCTAACTTCTACGTGCCCTTCTCCAATGCGATGGGTGTGGTACGCAGCCCCTTCAAGTACCCACAGTACTACCTGGCTGAGCCATG	1	1e-05	0
GAATGGCACAGAAGGCCCTAACTTCTACGTGCCCTTCTCCAATGCGATGGGTGTGGTACGCAGCCCCTTCGAGTACCCACAGTACTACCTGGCTGAGCCATG	1	1e-05	43GGGGGCCGGGCGACCAA
GAATGGCACAGAAGGCCCTAACTTCTACGTGCCCTTCTCCAATGCGATGGGTGTGGTACGCAGCCCCTTCGAGTACCCACGGTACTACCTGGCTGAGCCATG	1	1e-05	41GGTCGCCCGGCCTCAGTGAGCGAGCGAGCGCGCAGAAAGGG83G86GCC
GAATGGCACAGAAGGCCCTAACTTCTACGTGCCCTTCTCCAATGCGATGGGGGTGGCACGCAGCCCCTTCGAGTACCCACAGTACTACCTGGCTGAGCCATG	1	1e-05	0
GAACGGCACAGAAGGCCCTAACTTCTACGTGCCCTTCTCCAAT--GATGGGTGTGGTACGCAGCCCCTTCGAGTACCCACAGTACTACCTGGCTGAGCCATG	1	1e-05	0
GAATGGCACCGAAGGCCCTAACTTCTACGTGCCCTTCTCCAATGCGATGGGAGTGGTACGCAGCCCCTTCGAGTACCCACAGTACTACCTGGCTGAGCCATG	1	1e-05	0
GAATGGCACAGAAGGCCCTAACTTCTACGTGCCCTTCTTCAATGCGACGGGTGTGGTACGCAGCCCCTTCGAGTACCCACAGTACTACCTGGCTGAGCCATG	1	1e-05	0
GAACGGCACAG-AGGCCC-AATTTCTATGTGCCCTTCTCCAATG---TGGGCGTGGTACGGAGCCCCTTCGAGTACCCACAGTACTACCTGGCTGAACCATG	1	1e-05	14GC46ACA
GAATTGCACAGAAGGCCCTAACTTCTACGTGCCCTTCTCCAATGCGACGGGTGTGGTACGCAGCCCCTTCGAGTACCCACAGTACTACCTGGCTGAGCCATG	1	1e-05	0
GAATGGCACAGAAGGCCCTAACTTCTACGTGCCCTTCTCCAATGCGATGGGTGTGGTACGCCGCCCCTTCGAGTACCCACAGTCCTACCTGGCTGAGCCATG	1	1e-05	0
GAATGGCACAGAAGGCCCTAACTTCTACGTGTCCTTCTCCAATGCGATGGGTGTGGTACGCAGCCCCTTCGAGTACTCACAGTACTACCTGGCTGACCCATG	1	1e-05	0
GAATGGCACAGAAGGCCCTAACTTCTACGTGCCCTTCTCCAATGCGATGGGTGTGGTACGCAGCCCCTTCGAGTACCCACAGTACTACCTGGCTGAGCCATG	1	1e-05	42GTCGCCCGGCCTCAGTGAGCGAGCGAGCGCGCAGAGAGGGAGTGGCCAACTCCATCACTAGGGGTTCC
GAATGGCACAGAAGGCCCTAACTTCTACGTGCCCTT--------CGATGGGTGTGGTACGCAGCCCCTTCGAGTACCCACAGTACTACCTGGCTGAGCCATG	1	1e-05	55C
GAATGGCACAGAAGGCCCTAACTTCTACGTGCCCTTCTCCAATGCGATGGGTGTGGTACGCAGCCCCTTCGAGTACCCACAGTACTACCTGGCTGAGCCATG	1	1e-05	44TC
GAATGGCACAGAAGGCCCTAACTTCTACGTGCCCTTCTCCAATGCGATGGGTGTTGTACGCAGCCCCTTCGAGTACCCACAGTACTACCTGGCTGAGCCATG	1	1e-05	44C
GAATGGCACAGAAGGCCCTAACTTCTACATGCCCTTCTCCAATGCGATGGGTGTGGTACGCAGCCCCTTCGAGTACCCACAGTACTACCTGGCTGAGCCATG	1	1e-05	44T
GAATGGCACAGAAGGCCCTAACTTCTACGTGCCCTTCTCCTATGCGATGGGTGTGGTACGCAGCCCCTTCGAGTACCCACAGTACTACCTGGCTGGGCCATG	1	1e-05	0
GAACGGCACAG-AGGCCC-AA-TT-TATGTGCCCTTCACCAA--CGA--GGCGTGGT--GCAGCCCCTTCGAG--CCCGCAGTACTACCTGGC-GA-CCATG	1	1e-05	14GC22TT44TCAC59GG74AG94GA
GAATGGCACAGAAGGCCCTAACTTCTACGTGCCCTTCTCCAATGCGCTGGGTGTGGCACGCAGCCCCTTCGAGTACCCACAGTACTACCTGGCTGACCCATG	1	1e-05	0
GCATGGCACAGAAGGCCCTACCTTCTACGTGCCCTTCTCCAATGCGATGGGTGTGGTACGCAGCCCCTACGAGTACCCACAGTACTACCTGGCTGAGCCATG	1	1e-05	0
GAATGGCACAGAAGGCCCTAACTTCTACGTGCCCTTCTCCAATGCGATGGGTGTGGTACGCACCCCCTTCGAGTACCCACAGTACTACCTGGCTGATCCATG	1	1e-05	0
GAATGGCACAGAAGGCCCTAACATCCACGTGCCCTTCTCCAATGCGATGGGTGTGGTACGCAGCCCCTTCGAGTACCCACAGTACTACCTGGCTGAGCCATG	1	1e-05	0
GAATGGCACAGAAGG-CCTAACTTCTACGTGCCCT----------GATGGGTGTGGTACACAGCCCCTTCGAGTACCCACAGTACTACCTGGCTGAGCCATG	1	1e-05	0
GAATGGCACAGAAGGCCCTAACTTATACGTGCCCTTCTCCAATGCGATGGGTGTGGTACGCAGCCCCTTCGAGTACCCACAGTACTACCTGACTGAGCCATG	1	1e-05	0
GAATGGCACAGAAGGCCCTAACTTCTACGTGCCCTTCTCCAATGCGATGGGTGTGGTACGCAGCCCCTTCGAGTACCCACAGTACCACCTGCCTGAGCCATG	1	1e-05	0
GAATGGCACAGAAGGCCCTAACTTCTACGTGCCCTTCTCCAATG-GATGGGTGTGGTACGCAGCCCCTTCGAATACCCACAGTACTACCTGGCTGAGCCATG	1	1e-05	0
GAATGGCACAGAAGGCCCTAACTTCTACGTGTCCTTCTCCAATGCGATGGGTGTGGTACGCAGCTCCTTCGAGTACCCACAGTACTACCTGGCTGAGCCATG	1	1e-05	0
GAATGGCACAGACGGCCCTAACTTCTACGTGCCCTTCTCCAAT-CGATGGGTGTGGTACGCAGCCCCTTCGAGTACCCACAGTACTACCTGGCTGGGCCATG	1	1e-05	0
GAATGGCACAGAAGGCCCTAACTTCTACGTGCCCTTCTCCAATGCGATGGGTGTGGTACGCAGCCCCTTCGAGTACCCACAGTACTACCTGGCTGAGCCATG	1	1e-05	42AAGCCCGGGCGTCGGGCGACCTTTGGTCGCCCGGCCTCAGTGAGCGAGCGAGCGCGCAGAGAGGGAG
GAATGGCACAGAAGGCCCTAACTTCTACGTGCCCTTCTCCA---CGATGGGTGTTGTACGCAGCCCCTTCGAGTACCCACAGTACTACCTGGCTGAGCCATG	1	1e-05	0
GAATGGCACAGACGGTCCTAACTTCTACGTGC--TTCTCCAATGCGATGGGTTTGGAACGCAGCCC--TCGAGTACCCACAGTACTACCTAGCTGAGCCATG	1	1e-05	31T34T64A68A
GAATGGCACAGAAGGCCCTAACTTCTACGTGCCCTTCTCCAAT-CGATGGGTGTGGTACGTAGCCCCTTCGAGTACCCACAGTACTACCTGGCTGAGCCATG	1	1e-05	0
GAATGACACAGACGGCCCTAACTTCTACGTGCCCTTCTCCAATGCGATGGGTGTGGTACGCAGCCCCTTCGAGTACCCACAGTACTACCTGGCTGAGCCATG	1	1e-05	0
GAATGGCAGAGAAGG----AACTTCTACG-GC--------AATGCGATGGGTGTGGTACGCAGCCCCTTCGAGTACCCACAGTACTACCTGGCTGAGCCATG	1	1e-05	12AGGG25GAAG30GA36AAA
GAATGGCCCAGAAGGCCCTAACTTCTACGTGCCCTTCTCCAATGCGATGGGTGTGGTACGCAGCCCCTTCGAGTACCCACAGTACTACCTGGCTGGGCCATG	1	1e-05	0
GAATGGCACAGAAGGCCCTAACTTCTACGTGCCCTTCTCCAATGCGATGGGTGTGGTACGTAGCCCCTTCGAGTACCCACAGTACTACCTGGCTGAGCCATA	1	1e-05	0
GAATGGCACAGAAGGCCCTAACTTCTACGTGCCCTTCTCCA-----ATGGGTGTGGTACGCAGCCCCTACGAGTACCCACAGTACTACCTGGCTGAGCCATG	1	1e-05	0
GAATGGCACAGAAGGCCCTAACTTCTACGTGCCCTTCTCCAA--CGATGGGTGTGGTACGCAGCCCCTTCGAGTACCCACAGTACTACCTGGCTGAACCATG	1	1e-05	0
GAATGGCACAGAAGGCCCTAAC---GACGTGCCCTTCTCCAAT-CGATGGGTGTGGTACGCAGCCCCTTCGAGTACCCACAGTACTACCTGGCGGAGCCATG	1	1e-05	21AGG
GAATGGCACACAAGGCCCTAACTTCTACGTGCCCTTCTCCAATGCGATGGGTGTGGTACGCAGCCCCTTCGAGTACCCACAGTACTACCTGGCTGAGCCATG	1	1e-05	0
GAATGGCACAGAAGGCCCTAACTTCTACGTGCCCTTCTCCAATGCGATGGGTGTGGTACGCAGCCCCTTCGAGTACCCACAGTACTACCTGGCTGAGCCATG	1	1e-05	44GCCACTCCCTCTCTGCGCGCTCGCTCGCTCACTGAGGCCGGGCGACCAAAGGTCGCCCGACGCCCGGGCTTTGCCCGGGCGTC
GAATGGCACAGAAGGCCCTAACTTCTACGTGCCCTTCTCCAATGCGATGGGTGTGGTACGCAGCCCCTTCGAGTACCCACAGTACTACCTGGCTGAGCCATG	1	1e-05	43GATGGAGTTGGCCACTCCCTCTCTGCGCGCTCGCTCGCTCACTGAGGCCGG
GATTGGCACAGAAGGCCCTAACTTCTACGTGCCCTTCTCCACTGCGATGTGTGTGGTACGCAGCCCCTCCGATTACCCACAGTACTACCCGGCTGAGCCATG	1	1e-05	0
GAATGGCACAGAAGGCCCTAACTTCTACATGCCCTTCTCCAATGCGATGGGTGTGGTACGCAGCCCCTTCTAGTACCCACAGTACTACCTGGCTGAGCCATG	1	1e-05	0
GAATGGCACAGAAGGCCCTAACTTCTACGTGCCCTTCTCCAATGCGATGGGTGTGGTACGCAGCCCCTTCGAGTACCCACAGTACTACCTGGCTGAGCCATG	1	1e-05	44ATGGAGTTGGCCACTCCCTCTCTGCGCGCTCGCTCGCTCACTGAGGCCGGGCGACC
GAATGGCACAGAAGGCCCTAACTTCTACGTGCCCTTCTCCAAT------GGTGTGGTACGCAGCCCCTTCGAGTACCCACAGCACTACCTGGCTGAGCCATG	1	1e-05	0
GAATGGCACAGAAGGCCCTAACTTCTACGTGCCCTTCTCCAATGCGATGGGTGTGGTACGCAGCCCCTTCGAGTACCCACAGTACTACCTGACTGAGCCATG	1	1e-05	50GT
GAATGGCACAGAAGGCCCTAACTTCTACGTGCCCTTCTCCAATG---TGGGTGTGGTACGCAGCCCCTTCGAGTACCCACAGTACTACCTAGCTGAGCCATG	1	1e-05	0
GCATGGCACAGAAGGCCCTAACTTCTACGTGCCCTTCTCCAATGCGATGGGTGTGGTACGCAGCCCCTTCGAGTACCCACAGTACTACCTGGCTGAGCCATG	1	1e-05	43GC
GAATGGCACAGAAGGCCCTAACTTCTACGTGCCCTTCTCCAATGCGACGGGTGTGGTACGCAGCCCCTTCGAGTACCCACAGTACTGCCTGGCTGGGCCATG	1	1e-05	0
GAATGGCACAGAAGGACCTAACTTCTACGTGCCCTTCTGCAATGCGATGGGTGTGGTAAGCAGCCCCTTCGAGTACCCACAGTACTACCTGGCTGAGCCATG	1	1e-05	0
GAATGGCACAGAAGGCCCTGACTTCTACGTGCCCTTCTCCAAT--GATGGGTGTGGTACGCAGCCCCTTCGAGTACCCACAGTACTACCTGGCTGAGCCATG	1	1e-05	0
GAATGGCACAGAAGGCCCTAACTTCTACGTACCCTTCTCCA----------------ACGCAGCCCCTTCGAGTACCCACAGTACTACCTGGCTGAGCCATG	1	1e-05	0
GAATGGCACAGAAGGCCCTAACTTCTACGTGCCCTTCTCCAATGC------------------CCCCTTCGAGTACCCACAGTACTACCTGGCTGAGCCATG	1	1e-05	0
GAATGGCACAGAAGGCCCTAACTTCTACGTGCCCTTCTCCAATGCGATGGGTGTGGTACGCAGCCCCTTCGAGTACCCACAGTACTACCTGGCTGAGCCATG	1	1e-05	44GGTCGCCCGGCCTCAGTGAGCGAGCGAGCGCGCAGAGAGGGAGTGGCCAACTCCATCACTAGGGGTTCCTGCGGCCGCA
GAATGGCACAGAAGGCCCTAACTTCTACGTGCCCTTCTCCAATG-GATGGGTGTGGTACGCAGCCCCTTCGAGTACCCACAGTACTACCTGGCTGAGCCATG	1	1e-05	45CT
GAATGGCACAGAAGGCCCTAACTTCTACGTGCCCTTCTCCA-------------------------------------ACAGTACTACCTGGCTGAGCCATG	1	1e-05	0
GAATGGCACAGAAGGCCCTAACTTCTACGTGCCCTTCTCCAATGCGATGGGTGTGGTACGCAGCCCCTTCGAGTACCCACAGTACTACCTGGCTG-GCCATG	1	1e-05	93T
GAATGGCACAAAAGACCCTAACTTCTACGTGCCCTTCTCCAATGCGATGGGTGTGGTACGCAGCCCCTTCGAGTACCCACAGTACTACCTGGCTGAGCCATG	1	1e-05	0
GAATGGCACAGAAGGCCCTAACTTCTACGTGCCCTTCTCCAAT-CGATGGGTGTGGTACGCAGCCCCTTCGAGTACCCACAGTACTACCTGGCTGAGCCATG	1	1e-05	49GTGTGGCACGCAGCCCCTTCGA
GAATGGCACAGAAGGCCCTAACTTCTACGTGCCCTTCTCCAATGCGATGGGTGTGGTACGCAGCTCCTTCGAATACCCACAGTACTACCTGGCTGAGCCATG	1	1e-05	0
GAATGGCACAGAAGGCCCTAACTTCTACGTGCCCTTCTCCAATG-GATGGGTGTGGTACGCAGCCCCTTCGAGTACCCACAGTACTACCTGGCTGAGCCATG	1	1e-05	45CA
GAATGGCACAGAAGGCCCTAACTTCTACGAGCCCTTCTCCAATGCGATGGGTGTGGTACGCAGCCACTTCGAGTACCTACAGTACTACCTGTCTGAGCCATG	1	1e-05	0
GAATGGCACAGAAGGCCCTAACTTCTACGTGCCCTTCTCCAAT-CGATGGGTGTGGTACGCAGCCCCTTCGAGTACCCACCGTACTACCTGGCTGAGCCATG	1	1e-05	0
GAATGGCACAGAAGGCCCTAACTTCTACGTGCCCTTCTCC---GCGATGGGTGTGGTACGCAGCCCCTTCGAGTACCCACAGTACTACCTGGCTGTGCCATG	1	1e-05	0
GAATGGCACAGAAGGCCCTAACTTCTACGTGCCCTTCTCCAATACGAT-GGTGTGGTACGCAGCCCCTTCGAGTACCCACAATACTACCTGGCTGAGCCATG	1	1e-05	47C
GAAAGGCACAGAAGGCCCTAACTTCTACGTGCCCTTCTCCAATGCGACGGGTGTGGTACGCAGCCCCTTCGAGTACCCACAGTACTACCTGGCTGAGCCATG	1	1e-05	0
GAATGGCACAGAAGGCCCTAACTTCTACGTGCCCTTCTCCAATGCGATGGGTGTGGTACGCAGCCCCTTCAAGTACCCACAGTACTACCTGGCTGGGCCATG	1	1e-05	0
GAATGGCACACAAGACCCTAACTTCTACGTGCCCTTCTCCAATGCGATGGGTGTGGTACGCAGCCCCTTCGAGTACCCACAGTACTACCTGGCTGAGCCATG	1	1e-05	0
GAATGGCACAGAAAGCCCTAACTTCTACGTGCCCTTCTCCAATGCGATGGGTGTGGTACGCAGCCCCTTCGGGTACCCACAGTACTACCTGGCTGAGCCATG	1	1e-05	0
GAATGGCACAGAAGGCCCTAACTTCTACGTGCCCTTCTCCAATGCGATGGGTGTGGTACGCAGCCCCTTCGAGTACGCACAGTACTACCTGGCTGAGCCATG	1	1e-05	43G
GAATGGCACAGAAGGCCCTAACTTCTACGTGCCCTTCTCCAATGCGACGGGTGTGGTACGCAGCCCCTTCGAGTACCCACAGTAATACCTGGCTGAGCCATG	1	1e-05	0
GAACGGCACAGAGGGCCCTAA-TT-TATGTGCCCTTCTCCAA--CGA--GGCGTGGT--GCAGCCCCTTCGAG--CCCGCAGTACTACCTGGC-GA-CCATG	1	1e-05	22TT44TCAC59GG74AG94GA
GATTGGCACAGAAGGCCCTAACTTCTAAGTTCCCTTTTCCAAT--GATGGGTGTGGCACGCAGCCCCTTCGATTACCCACAGTACTACCTGGCTGAGCCATG	1	1e-05	0
GAATGGCACAGAAGGCCCTAACTTCTACGTGCCCTTCTCCAATGCGATGGGTGTGGTACGCAGCCCCTTCGAGTACCCACAGTACTACCTGGCTGAGCCATG	1	1e-05	44TTGGCCACTCCCTCTCTGCGCGCTCGCTCGCTCACTGAGGCCGCCCGGGCAAAGCCCGGGCGTCGGGCGACCTTTGGT
GAATGGCACAGAAGGCCCTCACTTCTACGCGCCCTTCTCCAATGCGATGGGTGTGGTACGCAGCCCCTTCGAGTACCCACAGTACTACCTGGCTGAGCCATG	1	1e-05	0
GAATGGCACAGAAGGCCCCAACTTCTACGTGCCCTTCTCCAATGCCATGGGCGTGGTACGCAGCCCCTTCGAGTACCCACAGTACTACCTGGCTGAGCCATG	1	1e-05	0
GAATGGCACAGAAGGCCCTAACTTCTACGTGCCCTTCTCCAA--CGAT--GTG-GG-ACGCAGCCCCTTCGAGTACCCACAGTACTACCTGGCGGAGCCATG	1	1e-05	44ACAC
GAATGGCACAGAAGGCCCTAACTTCTACGTGCCCTTCTCCAATGCAATGGGTGTGGTACGCAGCCCCTTCGAGTACCCACAGTACTACCTGGCTG-GCCATG	1	1e-05	94A
GAGTGGCACAGAAGGCCCTAACTTCTACGTGCCCTTCTCCAATGCGATGGGTGTGGTACGCCGCCCCTTCGAGTACCCACAGTACTACCTGGCTGAGCCATG	1	1e-05	0
GAATGGCACAGAAGGCCCTAACTTCTCCGTGCCCTTCTCCCATGCGATGGGTGTGGTACGCAGCCCCTTCGAGTACCCACAGTACTACCTGGCTGAGCCATG	1	1e-05	0
GAATGGCACAGAAGGCCCTAACTTCTACGTGCCCTTCTCCAATGCGATGGGTGTGGTACGCAGCCCCTTCGAGTACCCACAGTACTACCTGGCTGAGCCATG	1	1e-05	43ACGATG
GAATGGCACAGAAGGCCCTAACTTCTACGTGCCCTTCTCCAATGCGATGGGTGTGGTACGCAGCCCCTTCGAGTACCCACAGTACTACCTGGCTGGGCCATG	1	1e-05	43G
GAACGGCACAG-AGGCCC-AATTTCTATGTGCCCTTCTCCAA--CGA--GGCGTGGT--GCAGCCCCTTCGAG--CCCGCAGTACTACCTGGC-GA-CCATG	1	1e-05	14GC44TCAC59GG74AG94GA
GAATGGCACAGAAGGCCCTAACTTCTACGTGCCCTTCTCCAATGCGATGGGTGTGGTACGCACCCCCTTCGAGTACCCACAGTACTACCTGGCTGAGACATG	1	1e-05	0
GAATGGCACAGAAGGCCCTAACTTCTACGTGCCCTTCT-------GATGGGTGTGGTACGCAGCCCCTTCGAGTACCCACAGTACTACCTGGCTGAGCCATG	1	1e-05	0
GAATGGCACAGAAGGCCCTAACTTCTACGTGCCCTTCTCCAAT-CGATGGGTGTGGTACGCAGCCCCTTCGAGTACCCACAGTACTACCTGTCTGAGCCATG	1	1e-05	0
GAATGGCACAG-AGGCCCTAACTTCTACGTGCCCTTCTCCAATGCGATGGGTGTGGTACGCAGCCCCTTCGAGTACCCACAGTACTGCCTGGCTGAGCCATG	1	1e-05	0
GAATGGCACAGAAGGCCCTAACTTCTACATGCCCTTCTCTAATGTGATGGGTGTGGTACGCAGCCCCTTCGAGTACCCACAGTACTACCTGGCTGAGCCATG	1	1e-05	0
GAATGGCACAGAAGGCCCTAACTTCTACGTGCCCTT--------CGATGGGTGTGGTACGCAACCCCTTCGAGTACCCACAGTACTACCTGGCTGAGCCATG	1	1e-05	0
GAATGGCACAGAAGGCCCTAACTTCTACGTGCCCTTCT---A---GATGGGTGTGGTACGCAGCCCCTTCGAGTACCCACAGTACTACCTGGCTGAGCCATG	1	1e-05	0
GAATGGGACAGAAGGCGCTAACTTCTACGTGCCCTTCTCCAATGCGATGGGTGTGGTACGCAGCCCCTTCGAGTACCCACAGTACTACCTGGCTGAGCCATG	1	1e-05	0
GAATGGCACAAAAGGCCCTAACTTCTACGTGCCCTTCTCCAATGCGATGGGTGTGGTACGCAGCCCTTTCGAGTACCCACAGTACTACCTGGCTGAGCCATG	1	1e-05	0
GAATGGCACAGAAGGCCCTAACTTCTACGTGCCCTTCTCCAATGCGATGGGTATGGTACGCAGCCCCTTCGAGTACCCACAGTACTACCTGGCTGGGCCATG	1	1e-05	0
GAATGGCACAGAAGGCCCTAACTTCTACGTGCCCTTCTCCAATGCGATGGGTGTGGTACGCAGCCCCTTCGAGTACCCACAGTACTACCTGGCTGAACCATG	1	1e-05	44A
GAATGGCACAGAAGGCCCTAACTTCTACGTGCCCTTCTCCACTGCGATGGGCGTGGTACGCAGCCCCTTCGAGTACCCACAGTACTACCTGGCTGAGCCATG	1	1e-05	0
GAATGGCACAGAAGGCCCTAACTTCTACGTGCCCTTCTTCAATGCGATGGGTGTGGTACGCAGCCCCTTCGAGTACCCAGAGTACTACCTGGCTGAGACATG	1	1e-05	0
GAATGGAACAGAAGGCCCTAACTTCTACGTTCCCTTCTCCAATGCGATGGGTGTGGTACGCAGCCCCTTCGA--ACCCACAGTTCTACCTGGCTGAGCCATG	1	1e-05	71AC
GAATGGCACAGAAGGCCCTAACTTCTACGTGCCCTTCTCCA---CGATGGGTGTGGTACGCAGCCCCTTCGAGTACCCACAGTACTACCTGGCTTAGCCATG	1	1e-05	0
GACTGGAACAGAAGGCCCTAACCTCTACGTGCCCTTCTCAAATGCGATGGGTGTGGTACGCAGCCCCTTCGAGTACCCACAGTACTACCTGGCTGAGCCATG	1	1e-05	0
GAATGGCACAGAAGGCCCTAACTTCTACGTGCCCTTCTCCAAGGCGATGGGTGTGGTACGCAGCCCCTTCGAGTACCCACAGTACTACCTGGCTGAGCCATG	1	1e-05	0
GAATGGCACAGAAGGCCCTAACTTCTACGTGCCCTTCTCCAATGCGACGGGTGTGGTACGCAGCCCCTTCGAGTACCCATAGTACTACCTGGCTGAGCCATG	1	1e-05	0
GAATGGCACAGAAGGCCCTAACTTCTACGTGCCCTTCTCCAATGCGATGGGTGTGGTACGCAGCCCCTTCGAGTACCCACAGTACTACCTGACTGAGCGATG	1	1e-05	0
GAATGGCACAGAAGGCCCTAACTTCTACGTGCCCTTCTCCAAT--GATGGGTGTGGTACGCAGCCCCTTCGAGTACCCACAGTACTACCTGGCTTAGCCATG	1	1e-05	0
GAATGGCACAGAAGGCCCTAACTTCTACGTGCCCTTCACCAAT-CGATGGGTGTGGTACGCAGCCCCTTCGAGTACCCACAGTACTACCTGGCTGAGCCATG	1	1e-05	0
GCATGGCACAGAAGGCCCTAAC--CTACGTGCCCTTCTCCAATGCGATGGGTGTGGTACGCATCCCCTTCGAGAACCCACAGTACTACCTGGCTGAGCCATG	1	1e-05	24CA
GAATGGCACAGAAGGCCCTAACTTCTACGTGCCCTTCTCCAAT----T-GGTGTGGTACGCAGCCCCTTCGAGTACCCACAGTACTACCTGGCTGAGCCATG	1	1e-05	0
GAATGGCACAGAAGGCCCTAACTTCTACGTGCCCTTC-CCAATGCGATGGGTGTGGTACGCAGCCCCTTCGAGTACCCACAGTACTACCTGGCTGAGCCATG	1	1e-05	0
GAATGGCACAGAAGGCCCTAACTTCTACGTGCCCTTCTCCAATGCGATGGGTGTGGTACGCATCCCCTTCGAGTACCCACAGTACTACCTGGCTGA-CCATG	1	1e-05	95T
GAATAGCACAGAAGGCCCTAACTTCTACGTGCCCTTCTCCAA--CGATGGGTGTGGTACGCAGCCCCTTCGAGTACCCACAGTACTACCTGGCTGAGCCATG	1	1e-05	0
GAATGGCACAGAAGGCCCTAACTTCTACGTGCCCTTCTCCAAT------GGT-TGGT-CGC-GCCCCTTCGAG-ACCCACAGTACTACCTGGCTGAGCCATG	1	1e-05	49CCACTCCCTC61T66G68T70G73CGC78ACT83GGCCGGGC93C
GAACGGCACAG-AGGCCC-AA-TT-TATGTGCCCTTCTCCAA--CGATGGG--TGGT--GCAGCCCCTTCGAG--CCCGCAGTACTACCTGGC-GA-CCATG	1	1e-05	14GC22TT44TC47C51C59GG74AG94GA
GAATGGCACAGAAGGCCCTAACTTCTACGTGCCCTTCTCCAAT--GATGGGTGTGGTACGCAGCCCCTTCGAGTACCCACAATACTACCTGGCTGAGCCATG	1	1e-05	0
GAACGGCACAGAAGGCCCTAACTTCTACGTGCCCTTCTCCA---CGATGGGTGTGGTACGCAGCCCCTTCGAGTACCCACAGTACTACCTGGCTGAGCCATG	1	1e-05	0
GCATGGCACAGAAGGCCCTAACTTCTACGTGCCCTTCTCCAATGCGATGGGTGTGGTACGCAGCCCCTTCGAGTACCCACAGTACTACCTGGCTGGGCCATG	1	1e-05	0
GAACGGCACAGAAGGCCCTAACTTCTACGTGCCCTTCTCCAACGCGACGGGCGTGGTACGCAGCCCCTTCGAGCACCCGCAGTACTACCTGGCTGAGCCATG	1	1e-05	0
GAACGGCACAGAAGGCCCTAACTTCTACGTGTCCTTCTCCAATGCGATGGGTGTGGTACGCAGCCCCTTCGAGTACCCACAGTACTACCTGGCTGAGCCATG	1	1e-05	0
GAATGGCACAGAAGGCCCTAACTTCTACGTGCCCTTCTCCAAT--GATGGGTGTGGTACGCAGCCCCTTCGAGTACCCACAGTACTACCTTGCTGAGCCATG	1	1e-05	0
GAATGGCACAGTAGGCCCTAACTTCTACGTGCCCTTCTCCAATGCGATGGGTGTGGTACGCAGCCCCTTCGAGTACCAACAGTACTACCTGGCTGAGCCATG	1	1e-05	0
GAATGGCACAGAAGGCCCTAACTTCTACGTGCCCTTCTCCAATGCGATGGGTGTGGTACGCAGCCCCTTCGAGTACCCACAGTACTACCTGACTGAGCCATG	1	1e-05	44T
GAATGGCACAGAAGGCCCTAACTTCTACGTGCCCTTCTCC-ATGCGATGGGTGTGGTACGCAGCCCCTTCGAGTACCCACAGTACTACCTGGCTGAGCCATG	1	1e-05	42GTCGCCCGGCCTCAGAGAGAGAGCGAGCGCGCAGAGAGGGAGCG
GAATGGCACAGAAGGCCCTAACTTCTACGTGCCCTTCTCC----CGATGGGTGTGGTACGCAGTCCCTTCGAGTACCCACAGTACTACCTGGCTGAGCCATG	1	1e-05	38C
GAATGGCACAGAAGGCCCTAACTTCTACGTGCCC-------------TGGGTGTGGTACGCAGCCCCTTCGAGTACCCACAGTACTACCTGGCTGAGCCATG	1	1e-05	0
GAATGGCACAGAAGGCCCTAACTTCTACGTGCCCTTCTCCAA--CGATGGGTGTGGTACGCAGCCCCTTCGAGTACCCACGGTACTACCTGGCTGAGCCATG	1	1e-05	0
GAATGGCACAGAAGG-CCTA-CTTCTACGTGCCCTTCTCCAATGCGATGGGTGTGGTACGCAGCCCCTTCGAGTACCCACAGTACTACCTGGCTGAGCCATG	1	1e-05	18TG
GAATGGCACAGAAGGCCCTAACTTCTACGTGCCCTTCTCCAATGCGACGGGTATGGTACGCAGCCCCTTCGAGTACCCACAGTACTACCTGGCTGAGCCATG	1	1e-05	0
GAATGGCACAGCAGGCCCTAACTTCTACGTGCCCTACTCCAATGCGATGGGTGTGGTACGCAGCCCCTTCGAGTACCCACAGTACTACCTGGCTGAGCCATG	1	1e-05	0
GAATGGCACAGAAGGCCCTAACTTCTACGTGCCCTTCTCCAATGCGATGGGTGAGGTACGCAGCTCCTTCGGGTACCCACAGTACTACCTGGCTGAGCCATG	1	1e-05	0
GAATGGCACAGAAGGCCCTAACTTCTACGTGCCCTTCTCCAATGCGATGGGTGTGGTACGCAGCCCCTCCGAGTACCCACAGTACTACCTGGCTGAACCATG	1	1e-05	0
GAATGGCACAGAAGGCCCTAACTTCTACGTGCCCTTCT---A--C----------GTACGCAGCCCCTTCGAGTACCCACAGTACTACCTGGCTGAGCCATG	1	1e-05	0
GAACGGCACAG-AGGCCC-AA-TT-TATGTGCCCTTCTCCAA--CGA--GGCGTGGT--GCAGCCCCTTCGAGCACCCACAGTACTACCTGGCTGAGCCATG	1	1e-05	14GC22TT44TCAC59GG
GAATGGCACAGAAGGCCCTAACTCCTACGTGCCCTTCTCCAAT-CGATGGGTGTGGTACGCAGCCCCTTCGAGTACCCACAGTACTACCTGGCTGAGCCATG	1	1e-05	0
GAATGGCACAGAAGGCCCTAACTTCTACGTGCCCTTCTCCAATGCGATGGGTGTGGTACGCAGCCCCTTCGAGTACCCACAGTACTACCTGGCTGAGCCATG	1	1e-05	44TTCA
GAATGGCACAGAAGGCCCTAACTTCTACGTGCCCTTCTCCAATGCGATGGGTGTGGTACGCAGCCCCTACGAGTACCCAAAGTACTACCTGGCTGAGCCATG	1	1e-05	0
GAATGGCACAGAAGGCCCCAACTTCTACGTGCCCTTCTCCAATGCGATGGGTGTGGTACGCAGCCCCTTCGATTACCCACAGTACTACCTGGCTGAGCCATG	1	1e-05	0
GAATGGCACAGAAGGCCCTAACCTCTACGTGCCCTTCTCCAATGCGATGGGTGTGGCACGCATCCCCTTCGAGTACCCACAGTACTACCTGGCTGAGCCATG	1	1e-05	0
GAATGGCACAGAAGGCCCTAACTTCTACGTACCCTTCTCCAATGCGATGGGTGGGGTACGCAGCCCCTTCGAGTACCCACAGTACTACCTGGCTGAGCCATG	1	1e-05	0
GAATGGCACAGAAGGCCCTAACTTCTACGTGCCCTTCTCCAAT--GATGGGTGTGGTACGCAGCCCCTTCGAGTACCCACAGTACTACCTGGC-GA-CCATG	1	1e-05	92GA
GAATGGCACAGAAGGCCCTAACTTCTACGTGCCCTTCTCCAATGC-ATGGGTGTGCTACG-AGCCCC----AGTACCCACAGTACTACCTGGCTGAGCCATG	1	1e-05	44GTTGGC52CTCCCTCTC63C65C67C69C71C73C77C80T83G87GGG91GA
GAATGGCACAGAAGGCCCTAACTTATACGTGCCCTTCTCCAATGCGACGGGTGTGGTACGCAGCACCTTCGAGTACCCACAGTACTACCTGGCTGAGCCATG	1	1e-05	0
GAATGGCACAGAAGGTCCTAACTTCTACGTGCCCTTCTCCAATGCGACGGGTTTGGTACGCAGCCCCTTTGAGTACCCACAGCACTACCTTGCTGAGCCATG	1	1e-05	0
GAATGGCACAGAAGGCCCTAACTTTTACGTGCCCTTCTCCAATGCGATGGGTGTGGTACGAAGCCCCTTCGAGTACCCACAGTACTACCTGGCTGAGCCATG	1	1e-05	0
GAATGGCACAGAAGGCCCTAACTTCTACGTGCCCTTCTCCAATGCAATGGGTGTGGTACGCAGCCCCTTCAAGTACCCACAGTACTACCTGGCTGAGCCATG	1	1e-05	0
GAATGGCACAGAAGACCCTAACTTCTACGTGCCCCTCTCCAATGCGATGGGTGTGGTACGCAGCCCCTTCGAGTACCCACAGTACTACCTGGCTGAGCCATG	1	1e-05	0
GAATGGCACAGAAGGCCCTAACTTCTACGTGCCCTTCTCCAATGCGATGGGTGTGGTACGCAGCCCCTTCGAGTACCCACAGTACTACCTGGCTGAGCCATG	1	1e-05	44GCCCGGCCTCAGTGAGCGAGCGAGCGCGCAGAGAGGGAGTGGCCAACTCCATCACTAGGGGTTCCTGCGGCCGCAAAAATC
GAATGGCACAGAAGGCCCTAACTTCTACGTGCCCTTCTCCAATGCGATGGGTGTGGTACGCAGCCCCTTCGGGTACCCACAGTACTACCTGGCTGGGCCATG	1	1e-05	0
AAATGGCACAGAAGGCCCCAACTTCTACGTGCCCTTCTCCAATGCGATGGGTGTGGTACGCAGCCCCTTCGAGTACCCACAGTACTACCTGGCTGAGCCATG	1	1e-05	0
GAATGGCACAGAAGGCCCTAACTTCTACGTGCCCTTCTCCAA--CGATGGGCGTGGTACGCAGCCCCTTCGAGTACCCACAGTACTACCTGGCTGAGCCATG	1	1e-05	0
GAATGGCACAGAAGGCCCTAACTTCTACGTGCCCTTCTCCAATG-G--GGGTGTGG-ACGCAGCCCCTTCGAGTACCCACAGTACTACCTGGCTGAGCCATG	1	1e-05	0
GAATGGCACAGAAGGCCCTAAC--C-AAGTGCCCTTCTCCAATGCGATGGGGGTGGTACGCAGCCCCTTCGAGTACCCACAGAACTACCTGGCGGAGCCATG	1	1e-05	21CGG
GAATGGCACAGAAGGCCCTAACTTCTACGTGCCCTTCTCCAATGCTATGGGTGTGGTACGCAGCCCCTTCGAGTACCCACAGTACTACCTGGCTGAGCCATG	1	1e-05	44T
GAATGGCACAGAAGGCCCTAACTTCTACGTGCCCTTCTCC--------GGGTGTGGTACGCAGCCCCTTCGAGTACCCACAGTACTACCTGGCTGAACCATG	1	1e-05	0
GAATGGCACAGAAGGCCCTAACTTCTACGTGCCCTTCTCCAATGCGATGGGTGTGGTACGCAGCCCCTTCGAGTACCCACAGTACTACCTGGCTGAGCCATG	1	1e-05	42TTGCCCGGGCGGCCTCAGTGAGCGAGCGAGCGCGCAGAGAGGGAGTGGCCAACTCCATCACTAGGGGTTCCTGCGGCCGCAAAAATCTCGCCAACAAGT
GAACGGCACAGAGGGCCC-AA-TT-TATGTGCCCTTCTCCAA--CGA--GGCGTGGT--GCAGCCCCTTCGAG--CCCGCAGTACTACCTGGC-GA-CCATG	1	1e-05	101A
GAATCGCACAGAAGGCCCTAACTTCTACGTGCCCTTCTCCACT-CGATGGGTGTGGTACGCAGCCCCTTCGAGTACCCACAGTACTACCTGGCTGAGCCATG	1	1e-05	0
GAATGGCACAG-AGGCCC-AA-TT-TATGTGCCCTTCTCCAA--CGA--GGCGTGGT--GCAGCCCCTTCGAGTACCCACAGTACTACCTGGCTGAGCCATG	1	1e-05	14GC22TT44TCAC59GG
GAATGGCACAGAAGGCCCTAACTTCTACGTGCCCTT-----A--CGATGGGTGTGGTACGCAGCCCCTTCGAGTACCCACAGTACTACCTGGCTGAGCCATG	1	1e-05	0
GAATGGCACAGAAGGCCCTAACTTCTACGTGCCCTTCCCCAATGCGATGGGTGTGGTACGCAGCACCTTCGAGTACCCACAGTACTACCTGGCTGAGCCATG	1	1e-05	0
GAATGGCACAGAAGGCCCTAACTTCTACGTGCCCTTCTCCAAT-CGATGGATGTGGTACGCAGCCCCTTCGAGTACCCACAGTACTACCTGGCTGAGCCATG	1	1e-05	0
GAATGGCACAGCAGGCCCTAACTTCTACGTGCCCTTCTCCAATCCGATGGGTGTGGTACGCAGCCCCTTCGAGTACCCACAGTACTACCTGGCTGAGCCATG	1	1e-05	0
GAATGGAACAGAAGGCCCTAACTTCTACGTGCCCTTCTCCAATGCGATGGGTGTGGTACACAGCCCCTTCGAGTACCCACAGTACTACCTGGCTGAGCCATG	1	1e-05	0
GAATGGCACAGAAGGCCCCAACTTCTACGTGCCCTTCTCCAATGCGATGGGTGTGGTAAGCAGCCCCTTCGAGTACCCACAGTACTACCTGGCTGAGCCATG	1	1e-05	0
GAATGGCACAGAAGGCCCTAACTTCTACGTGCCCTTCTCCAA-GCGATGGGTGTGGTACGCAGCCCCTTCGATTACCCACAGTACTACCTGGCTGAGCCATG	1	1e-05	0
GAATGGCACAGAAGGCCCTAACTTCTACATGCCCTTCTCCAATGCGATGGGTGTGGTACGCAGCCCCTTCGAGTACCCACAGTACCACCTGGCTGAGCCATG	1	1e-05	0
GAACGGCACAG-AGGCCCT---TT-TATGTGCCCTTCTCCAA--CGA--GGCGTGGT--GCAGCCCCTTCGAG--CCCGCAGTACTACCTGGC-GA-CCATG	1	1e-05	14GC19AGT44TCAC59GG74AG94GA
GAATGGCACAGAGGGCCCTAACTTCTACGTGCCCTTCTCCAATGCGATGGGTGTGGTACGCACCCCCTTCGAGTACCCACAGTACTACCTGGCTGAGCCATG	1	1e-05	0
GAATGGCACAGAAGGCCCTAACTTCTACGTGCCCTTCT------CGATGGGTGTGATACGCAGCCCCTTCGAGTACCCACAGTACTACCTGGCTGAGCCATG	1	1e-05	0
GAATGGCACAGAAGGCCCTAACTTCTACGTGCCCTTCTCCAATGCGACGGGTGTGGTACGCAGCCCCTTCGAGTACCCACAGTACTACCTGGCTGAGCC--G	1	1e-05	100T
GAATGGCACAGAAGGCCCTAACTTCTATGTGTCCTTCTCCAAAGCGATGGGTGTGGTACGCAGCCCCTTCGAGTACCCACAGTACTACCTGGCTGAGCCATG	1	1e-05	0
GAATGGCACAGAAGGCCCTAACTTCTACGTGCCCTTCTCCAATGCGATGGGTGTGGTACGCAGCCCCTTCGAGTACCCAAAGTACTACCTGACTGAGCCATG	1	1e-05	0
GAATGGCACAGAAGGCCCTAACTCCTACGTGCCCTTCTCCAA-----------TGGTACGCAGCCCCTTCGAGTACCCACAGTACTACCTGGCTGAGCCATG	1	1e-05	0
GAATGGCACAGAAGGCCCTAACTTCTACGTGCCCTTCTCCAATGCGATGGGTGTGGTACACAGCCCCTTCGAGTATCCACAGTACTACCTGGCTGAGCCATG	1	1e-05	0
GAATGGCACAGAAGGCCCTCACTTCCACGTGTCCTTCTCCAATGCGATGGGTGTGGTACGCAGCCCCTTCGAGTACCCACAGTACTACCTGGCTGAGCCATG	1	1e-05	0
GAATGGCACAGAAGGCCCTAACTTATACGTGCCCTTCTCCAATGCGATGGGTGTGGTACGCAGCCCCTTCGAGTACCCACAGTACTACCTGGCTGAGCCATG	1	1e-05	44TTTGGTCGCCCGGCCTCAGTGAGCGAGCGAGCGCGCAGAGAGGGAGTGGCC
GAATGGCACAGAAGGCCCTAACTTCTACGTGCCCTTCTCCAATGCGATGGGTGTGGT--GCAGCCCCTTCGAG--CCCGCAGTACTACCTGGC-GA-CCATG	1	1e-05	44AC61GG76AG96GA
GAATGGCACAGAAGGCCCTAACTTCTACGTGCCCTTCTCCAATGTGATGGGTGTGGTACGCAGCCCCTTCGAGTACCTACAGTACTACCTGGCTGAGCCATG	1	1e-05	0
GAATGGCACAGAAGGCCCTAACTTCTACGTGCCCTTCTCCAATGCGATGGGTGTGGTACGCAGCCCCTTCGAGTACCCACAGTACTACCCGGCTGAGCCATG	1	1e-05	44C
GAATGGCACAGAAGGCCCTAACTTCTACGTGCCCTTCTCCA---CGATGGGTGTGGTACGCAGCCCCTTCGAGTACCCACAGTAATACCTGGCTGAGCCATG	1	1e-05	0
GAATGGTACAGAAGGCCCTAACTTCTACGTGCCCTTCTCCAATG---TGGGTGTGGTACGCAGCCCCTTCGAGTACCCACAGTACTACCTGGCTGAGCCATG	1	1e-05	0
GAACGGCACAG-AGGCCC-AA-TT-TATGTGCCCTTCTCCAA--CGA--GGCGTGGT--GCAGCCCCTTCGAGTACCC--AGTACTACCTGGC-GA-CCATG	1	1e-05	14GC22TT44TCAC59GG75G78G94GA
GAATGGCACAGAAGGCCCTAACTTCT-C-TGCCCTTCTCC--TGCGATGGGTGTGGTACGCAGCCCCTTCGAGTACCCACAGTACTACCTGGCTGAGCCATG	1	1e-05	10GTACTAGACGC23CCGGCCGC34AAC42GTGATGGAGTTGGCC60CCC70G72G75CGC79CG84A88AGGCCGGGCGAC
GAATGGCACAGAAGGCCCTAACTTCTACGTGCCCTTCTCAAATGCGATGGGTGTGGTACGCACCCCCTTCGAGTACCCACAGTACTACCTGGCTGAGCCATG	1	1e-05	0
GAATGGCACAGAAGGCCCTAACTTCTACGTGCCCTTCTCCAATGCGATGGGTGTGGTACGCAGCCCCTTCGAGTACCCACAGTACCACCTGGCTTAGCCATG	1	1e-05	0
GAATGGCACAGAAGGCCCTAACTTCTACGTGCCCTTCTCCAA--CGATGGGTGTGGTACGCACCCCCTTCGAGTACCCACAGTACTACCTGGCTGAGCCATG	1	1e-05	0
GAATGGCACAG-AGGCCCTAACTTCTACGTGCCCTTCTCCAATGCGACGGGTGTGGTACGCAGCCCCTTCGAGTACCCACAGTACTACCTGGCTGAGCCATG	1	1e-05	0
GAATGGCACAGAAGGCCCTAACTTCTACGTGCCCTTCTCCAAT-CGATGGGTGTGGTACGCAGCCCCTTCGAGTACCCACAGTACTACCCGGCTGAACCATG	1	1e-05	42C
GAATGGCACAGAAGG-CCTAACCTCTACG-G-CCTTCTCCAATGCGATGGGTGTGGTACGCAGCCCCTTCGAGTACCCACAGTACTACCTGGCTGAGCCATG	1	1e-05	27GG
GAATGGCACAGAAGGCCCTAACTTCTACGTGCCC-TCTCCAATGCGACGGGTGTGGTACGCAGCCCCTTCGAGTACCCACAGTACTACCTGGCTGAGCCATG	1	1e-05	0
GAATGGCACAGAAGGACCTAACTTCTACGTGCCCTTCTCCAA--CGATGGGTGTGGTACGCACCCCCTTCGAGTACCCACAGTACTACCTGGCTGAGCCATG	1	1e-05	0
GAATGGCACAGAAGGCCCTAACTTCTACGT--------------------------------GCCCCTTCGAGTACCCACAGTACTACCTGGCTGAGCCATG	1	1e-05	0
GAACGGCACAG-AGGCCC-AA-TT-TATGTGCCCTTCTCCAA--CGA--GGCGTGGT--GCAGCCCCTTCGAG--CCCGCAGTACTACATGGC-GA-CCATG	1	1e-05	14GC22TT44TCAC59GG74AG94GA
GAATGGCACAGAAGGCCCTAACTTCTACGTGCCCTTCTCCAATGCGATGGGTGTGGTACGCAGCCCCTTCGAGTACCCACAGTACTACCTGGCTGAGCCATG	1	1e-05	44AAAGCCCGGGCGGCCTCAGTGAGCGAGCGAGCGCGCAGAGAGGGAGTGGCCAAC
GAACGGCACAG-AGGCCC-AA-TT-TATGTGCCCTTCTCCAA--CGA--GGCGTGGT--GCAGCCCCTTCGAG--CCCGCAGTACTACCTGGC-GA-CCATG	1	1e-05	14GC22TT44ACAC59GG74AG94GA
GAATGGCACAGAAGGCCCTAACTTCTACGTGCCCTTCTCCAATGCGATGGGTGTGGTACGCAGCCCCTTCCAGTACCCACAGTACTACCTGGCTGAGCCATG	1	1e-05	0
GAATGGCACAGAAGGCCCTAACTTCTACGTGCCCTTCTCCAATG-GATGGGTGTGGTACGCAGCTCCTTCGAGTACCCACAGTACTACCTGGCTGAGCCATG	1	1e-05	0
GAATGGCACAGAAGGCCCTAACTTCTACGTGCCCTTCTCCAATGCGATGGATGTGGTACGCAGCCCCTTCGAGTACCCACAGTACTACCTGGCTGGGCCATG	1	1e-05	0
GAATGGCACAGAAGGCCCTAACTTCTACGTGCCCTTCTCCAATGCGATGGGTGTGGTACGCAGCCACTTCGAGTACCCACAGTACTACCTGGCTGAGCCATG	1	1e-05	43G
GAATGGCACAGAAGGCCCTAACTTCTACGTGCCCTTCTCCAATGCAATGGGTGTGGTATGCAGCCCCTTCGAGTACCCACAGTACTACCTGGCTGTGTCATG	1	1e-05	0
GAATGGCACAGAAGGCCCTAACTTCTACGTGCCCTTCTCCAA--CGATGGGTGTGGTACTCAGCCCCTTCGAGTACCCACAGTACTACCTGGCTGAGCCATG	1	1e-05	0
GAATGGCACAGAAGGCCCTAACTACTACGTGCCCTTCTCCAA--CGATGGGTGTGGTACGCAGCCCCTTCGAGTACCCACAGTACTACCTGGCTGAGCCATG	1	1e-05	0
GAATGGCACAGAAGGCCCTAACTTCTACGTGCCCTTCTCCA---CGATGGGTGTGGTACGCGGCCCCTTCGAGTACCCACAGTACTACCTGCCTGAGCCATG	1	1e-05	0
GAATGGCACAGAAGGCCCTAACTTCTACGTGCCCTTCTCCAAT--GATGGGTGTGGTACGCAGCCCCTTCGAGTACTCACAGTACTACCTGGCTGAGCCATG	1	1e-05	0
GAATGGCACAGAAGGCCCTAACTTCTACGTGCCCTTCTCCAATGCGATGGTTGTGGTACGCAGCCCCTTCGAGTACCCACAGTACTAACTGGCTGAGCAATG	1	1e-05	0
GAATGGCACAGAAGGCCCTAACTTCTACGTGCCCTTCTCCAATGCGATGGGTGTGGTAAGCAGCCCCTTCGAGTACCCACAGTACTACCTGGCCGAGCCATG	1	1e-05	0
GAATGGCACAGAAGGCCCTAACTTCTACG-GCCC-TCTCCAATGCGACGGGTGTGGTACGCAGCCCCTTCGAGTACCCACAGTACTACCTGGCCGAGCCATG	1	1e-05	30GC
GAATGGCACAGAAGGCCCTAACCTCTACGTGCCCTTCTCCAAT--GATGGGTGTGGTACGCAGCCCCTTCGAGTACCCACAGTACTACCTGGCTGAGCCATG	1	1e-05	0
GAATGGCACAGAAGGCCCTAACTTCTACGTGCCCTTCTCCAATG-GATGGGTGTGGTACGCACCCCCTTCGAGTACCCACAGTACTACCTGGCTGAGCCATG	1	1e-05	0
GAATGGCACAGAAGGCCCTAACTTCTACGTGCCATTCTCCAAT-CGATGGGTGTGGTACGCAGCCCCTTCGTGTACCCACAGTACTACCTGGCTGAGCCATG	1	1e-05	0
GAATGGCACAGAAGGCCCTAACTTCTACGTGCCCTTCTCCAATGCGATGGGTGTGGTACGCAGCCCCTTCGAGTACGCAAAGTACTACCTGGCTGAGCCATG	1	1e-05	0
GAATGGCACAGAAGGCCCTAACTTCTACGTGCCCTTCTCCAAT-CGATGGGAGTGGTACGCAGCCCCATCGAGTACCCACAGTACTACCTGGCTGGGCCATG	1	1e-05	0
GAATGGCACAGAAGGCCCTAACTTCTACGTGCCCTTCTCCAATGCGATGGGTGTGGTACGCAGTCCCTTCGAGTACCCACAGTACTACCTGGCTGAGCCATG	1	1e-05	43G
GAATGGCACAGAAGGCCCTAACTTCTACGTGCCCTTCTCCAATGCGATGGGTGTGGTACGCAGCCCCTTCGAGTACCCACAGTACTACCTGGCTGAGCCATG	1	1e-05	44CGCCCGGCCTCAGTGAGCGAGCGAGCGCGCAGAGAGGGAGTGGC
GAATGGCACAGAAGGCCCTAACTTCTACGTGCCCTTCTCCAA--CGATGGGTGCGGTACGCAGCCCCTTCGAGTACCCACAGTACTACCTGGCTGAGCCATG	1	1e-05	0
GAATGGCACAGAAGGCCCTAACTTCTACGTGCCCTTCTCCAAT-CGATGGGTGTGGTACGCAACCCCTTCGAGTACCCCCAGTACTACCTGGCTGAGCCATG	1	1e-05	0
GAATGGCACAGAATGCCCTAACTTCTACGTGCCCTTCTCCAATGCGATGGGTGTGGTACGCAGCCCCTTCGAGCACCCACAGTACTACCTGGCTGAGCCATG	1	1e-05	0
GAATGGCACAGAAGGCCCTAACTTCTACGTGCCCTCCTCCAATGCGATGGGCGTGGTACGCAGCCCCTTCGAGTACCCACAGTACTACCTGGCTGAGCCATG	1	1e-05	0
GAATGGCACAGAAGGCCCTAACTTCTACGTGCCCTTCTCCAATGCGACGGGTGTGGTACGCAGCCCCTTCGCGTACCCACAGTACTACCTGGCTGAGCCATG	1	1e-05	0
GAATGGCACAGAAGGCCCTAACTTCTACGTGCC--------A---GATGGGTGTGGTACGCAGCCCCTTCGAGTACCCACAGTACTACCTGGCTGAGCCATG	1	1e-05	0
GAATGGCACAGAAGGCCCTAACTTCTACGTGCCCTTCTCCAATGCGATGGGTGTGGTACGCAGCCCCTTCGAGTACCCACACTACTACCTGGCTGAGCCATG	1	1e-05	0
GAATGGCACATAAGGCCCTAACTTCTACGTGCCCTTCTCCAAT-------GTGTGGTACGCAGCCCCTTCGAGTACCCACAGTACTACCTGGCTGAGCCATG	1	1e-05	0
GAACGGCACAGAAGGCCCTAACTTCCACGTGCCCTTCTCCAATGCGATGGGTGTGGTACGCAGCCCCTTCGAGTACCCACAGTACTACCTGGCTGAGCCATG	1	1e-05	0
GAATGGCACAGAAGGCCCTAACTTCTACATGCCCTTCTCCAATGCGATGGGTGTGGTACGCAGCCCTTTCGAGTACCCACAGTACTACCTGGCTGAGCCATG	1	1e-05	0
GAACGGCACAG-AGGCCC-AA-TT-TATGTGCCCTTCTCCAA--CGA--GGCGTGGT--GCAGCCCCTTCGA-T-CCCGCAGTACTACCTGGC-GA-CCATG	1	1e-05	14GC22TT44TCAC59GG74AG94GA
GAATGGCACAGAAGGCCCTAACTTCTACGTGCCCTTCTCCAAT-CGATGGGGGTGGTACGCAGCCCCTTCGAGTACCCACAGTACTACCTGGCTGAGCCATG	1	1e-05	0
GAATGGCACAGAAGGCCCTAACTTCTACGTGCCCTTCTCCAATGCGATGGGTGTGGTACGCAGCCCCTTCGAGTACCCACAGTACTACCTGGCTGAGACATG	1	1e-05	44A
GAATGGCACAGAAGGCCCTAACTTCTACGCGCCCTTCTCCAAT-CGATGGGTGTGGTACGCAGCCCCTTCGAGTACCCACAGTACTACCTGGCTGAGCCATG	1	1e-05	0
GAATGGCACAGAAGGCCCTAACTTCTAC--GCCCTTCTCCAATGCGATGGGTGTTGTACGCAGCCCCTTCTAGTACCCACAGTACTACCTGGCTGAGCCATG	1	1e-05	30G32A
GAATGGCACAGAAGGCCCTAACTTCTACGTGCCCTTCTCCAA-GCGATGGGTGTGGTACGCAGCCCCTTCGAGTATCCACAGTACTACCTGGCTGAGCCATG	1	1e-05	0
GAATGGCACAGAAGGCTCTAACTTCTACGTGCCCTTCTCCAAT-CGATGGGTGTGGTACGCAGCCCCTTCGAGTACCCACAGTACTACCTGGCTGAGCCATG	1	1e-05	0
GAATGGCACAGAAGGCCCTAACTTCTACGTGCCCTTCTCCAATGCGATGGGTGTGGTACGCAGCCCCTTCGAGTACCCACAGTACTACCTGGCTGAGCCATG	1	1e-05	45GATGGGTGTGA
GAATGGCACAGAAGGCCCTAACTTCTACGTGCCCTTCTCCAATGCGATGGGTGTGGTACGCAACCCCTTCGAGTACCCACAGTACTACCTGGCTGAGCCACG	1	1e-05	0
GAATGGCACAGAAGGCCCTAAC----ACGTGCCCTTCTCCAATGCGATGGGTGTGGTACGCAGCCCCTTCGAGTACCCACAGTACTACCTGGCTGAGCCATG	1	1e-05	23GAAA
GAATGGCACAGAAGGCCCTAACTTCTACGTGCCCTTCTCCAA---GATGGGCGTGGTACGCAGCCCCTTCGAGTACCCACAGTACTACCTGGCCGAGCCATG	1	1e-05	0
GAATGGCGCAGAAGGCCCTAACTTCTACGTGCCCTTCTCCAATGGGATGGGTGTGGTACGCAGCCCCTTCGAGTACCCACAGTACTACCTGGCTGAGCCATG	1	1e-05	0
GAATGGCACAGAAGGCCCTAACTTCTACGTGCCCTTCTCCAATGCGATGGGTGGGGAACGCAGCCCCTTCGAGTACCCACAGTACTACCTGGCTGAGCCATG	1	1e-05	0
GAATGGCACAGAAGGCCCTAACTCCTACGTGCCCTTCTCCAATGCGATGGGTGTGGTACGCAGCCCCTTCGAGTACCCACAGAACTACCTGGCTGCGCCATG	1	1e-05	0
GAATGGCACAGCAGGCCCTAACTTCTACGTGCCCTTCTCCAATGCGACGGGTGTGGTACGCAGCCCCTTCGAGTACCCACAGTACTACCTGGCTGAGCCATG	1	1e-05	0
GAATGGCACAGAATGCCCTAACTTCTACGTGCCCTTCTCCAATGCGATGGGTGTGGTACGCAGCCCATTCGAGTACCCACAGTACTACCTGGCTGAGCCATG	1	1e-05	0
GAATGGCACAGAAGGCCCTAACTTCTACGTGCCCTTCTCCAAT-CGATGGGTGTGGTACGCAGCACCTTCGAGTACCCACAGTACTACCTGGCTGAGCCATG	1	1e-05	0
GAATGGCACAGAAGGCCCTAACTTCTACGTGCCCTTCTCCAATGCGACGGGTGTGGTACGCAGCCCCTTCGAGTACCCACAGTACTACCTGGCTGGGCCATG	1	1e-05	43G
GAATGGCACAGAAGGCCCTAACCTCTACGTGCCCCTCTCCAATGCGATGGGTGTGGTACGCAGCCCCTTCGAGTACCCACAGTACTACCTGGCTGAGCCATG	1	1e-05	0
GAACGGCACAG-AGGCCC-AA-TT-TATGTGCCCTTCTCCAA--CGA--GGCGTGGT--GCAGCCCCTTCGAG--CCCGCAGTACTACCTGGC-GA-CCGTG	1	1e-05	14GC22TT44TCAC59GG74AG94GA
GAATGGCACAGAAGGCCCTAACTTCTACGTGCCCTTCTCCAAT-------GTGTGGTAAGCAGCCCCTTCGAGTACCCACAGTACTACCTGGCTGAGCCATG	1	1e-05	0
GAATGGCACAGAAGGCCCTAACTTCTA---------CT----TGCGATGGGTGTGGTACGCAGCCCCTTCGAGTACCCACAGTACTACCTGGCTGAGCCATG	1	1e-05	0
GAATGGCACAGAAGGCCCTATCTTCTACGTGCCCTTCTCCAATG----------GGTACGCAGCCCCTTCGAGTACCCACAGTACTACCTGGCTGAGCCATG	1	1e-05	0
GAATGGCACAGAAGGCCCTAACTTCTACGTGCCCTTCTCCAATGCGATGGGTGTGGTACGCAGCCCCTTCGAGTACCCACAGTACTACCTGGCTGAGCCATG	1	1e-05	43GTGGCCACTCCCTCTCTGCGCGCTCGCTCGCTCACTGAGGCCGGGCGACCAAA
GAACGGGACAG-AGGCCC-AA-TT-TAC--GCCCTCCTCCAA--CGA--GGCGTGGT--GCAGCCCCTTCGAG--CCCGCAGTACTACCTGGC-GA-CCAGG	1	1e-05	14GC22TT27TG44TCAC59GG74AG94GA
GAATGGCACAGAGGGCCCTAACTTCTACGTGCCCTTCTCCAA---------TGTGGTACGCAGCCCCTTCGAGTACCCACAGTACTACCTGGCTGAGCCATG	1	1e-05	0
GAACGGCACAGAAGGCCCTAATTTCTATGTGCCCTTCTCCAATGCGACGGGCGTGGTACGCAGCCCCTTCGAGCACCCGCAGTACTACCTGGC-GA-CCATG	1	1e-05	94GA
GAACGGCACAGAGGGCCCTAACTTCTACGTGCCCTTCTCCAATGCGATGGGTGTGGTACGCAGCCCCTTCGAGTACCCACAGTACTACCTGGCTGAGCCATG	1	1e-05	44A
GAATGGCACAGAAGGCCCTAACTTCTACGTGCCCTTCTCCAATGCGATGGGTGTGGTACGCAGCCCCTTCGAGTACCCACAGTACTACCTGACTGAGCCATG	1	1e-05	43G
GAATGTCACAGAAGGCCCTAACTTCTACGTGCCCTTCTCCAAT-CGATGGGCGTGGTACGCAGCCCCTTCGAGTACCCACAGTACTACCTGGCTGAGCCATG	1	1e-05	0
GAACGGCACAG-AGGCCC-AA-TT-TATGTGCCCTTCTCCAA--CGA--GGCGTGGT--GCAGCCCCTTCGAG---CCACAGTACTACCTGGC-GA-CCATG	1	1e-05	14GC22TT44TCAC59GG74AG78G94GA
GAATGGCACAGAAGGCCCTAACTTCTACGTGCCCTTCTCCAATGCGATGGGTGTGGTACGCAGCCCCTTCGAGTACCCACAGTACTACCTGGCTGAGCCATG	1	1e-05	43GTCGCCCGGCCTCAGTGAGCGAGCGAGCGCGCAGAGAGGGAGTGGCCTTG
GAATGGCACAGAAGGCCCTAACTTCTACGTGCCCTTCTCCAA-GCGATGGGTGTGGTACGCAGCCCCTTCGAGTACCCACAGTACTACCTGGCTGAGCCATG	1	1e-05	36CGGTCGCCCGGC51AGTGAGCGAGCGAGCGCG71GAG76GGA
GAACGGCACAG-AGGCCC-AA-TT-TATGTGCCCTTCTCCAA--CGA--GGCGTGGT--GCAGCCCCTTCGAG--CCCGCAGTCCTACCTGGC-GA-CCATG	1	1e-05	14GC22TT44TCAC59GG74AG94GA
GAATGGCACAGAAGGCCCTAACTTCTACGTGCCCTTCTCCAATTCGATGGGTGTGGTACGCACCCCCTTCGAGTACCCACAGTACTACCTGGCTGAGCCATG	1	1e-05	0
GAATGGCACAGAAGGCCCTAACTTCTACGTGCCCTTCTCCAATGCGATGGGTGTGGTACGCAGCCCCTTCGAGTACCCACAGTACTACCTGGCTGAGCCATG	1	1e-05	43ACCAAACACACCTAAGGAAGGAA67T
GAATGGCACAGAAGGACCTAACTTCTACGTGCCCTTCTCCAATGCGATGGGTGTGGAACGCAGCCCCTTCGAGTACCCACAGTACTACCTGGCTGAGCCATG	1	1e-05	0
GAACGGCACAG-AGGCCC-AA-TT-TA--TGCCCTTCTCCAA--CGA--GGCGTGGT--GCA-CCCCTTCGAG--CCCGCAGTACTACCTGGC-GA-CCATG	1	1e-05	14GC24TTAT44TCAC59GGA74AG94GA
GAATGGCACAGAAGGCCCTGACTTCTACGTGCCCTTCTCCAATGCGATGGGTGTGGTACGCAGCCCCTTCGAGTACCCACAGTACTACCTGGCTGAGCCATG	1	1e-05	44A
GAATGGCACAGAAGGCCCTAACTTCTACGTGCCCTTCTCCAATTCGATGGGTGTGGTACGCAGCCCCTTCGAGTACCCACAGTACTACCTGGCTGTGCCATG	1	1e-05	0
GAATGGCACAGAAGGCCCCAACTTCTACGTGCCCTTCTCCAA--CGATGGGTGTGGTACGCAGCCCCTTCGAGTACCCACAGTACTACCTGGCTGAGCCATG	1	1e-05	0
GAATGGCACAGAAGGCCCTAACTTCTACGTGCCCTTCTCCAATGCGATGGGTGTGGCACGCAGCCCCTTCGTGTACCCACAGTACTACCTGGCTGAGCCATG	1	1e-05	0
GAATGGCACAGAAGGCCCTAACTTC--------------------------TGTGGTACGCAGCCCCTTCGAGTACCCACAGTACTACCTGGCTGAGCCATG	1	1e-05	0
GAACGGCACAG-AGGCCC-AA-TT-TATGTGCCCTTCTCCAA--CGA---G-GTGGT--GCAGCCCCTTCGAG--CCCGCAGTACTACCTGGC-GA-CCATG	1	1e-05	14GC22TT44TCAC51CC59GG74AG94GA
GAATGGCACAGAAGGCCCTAACTTCTACGTGCCCTTCTCCAA--CGATGGGTGTGGTACGCAGCCCCTTCGAGTACCCACAGTACTAACTGGCTGAGCCATG	1	1e-05	0
GAATGGCACAGAAGGCCCTAACTTCTACGTGCCCTTCCCCAATGCGATGGGTGTGGCACGCAGCCCCTTCGAGTACCCACAGTACTACCTGGCTGAGCCATG	1	1e-05	0
GAATGGCACAGAAGGCCCTAACTTCTACGTGCCCTTCTCCAATGCGATGGGTGTGGTACGCAGCCCCTTCGAGTACCCACAGTACTACCTGGCTGAGCCATG	1	1e-05	42CCAAAGGTCGCCCGACGCCCGGGCTTTGCCCGGGCGGCCTCAG86GAGCGAGCGAGCGCGCA
GAATGGCACAGAAGGCCCTAACTTCTACGTGCCCTTCTCCAATGCGATGGGTGTGGTACGCAGCCCCTTCGAGTACCCATAGTACTACCTGGTTGAGCCATG	1	1e-05	0
GAATGGCACAGAAGGCCCTAACTTCTACGTGCCCTTCTCCAA--CGATGGGTGTGGTACGCAGCCCCTTCGAGTACCCACAGTACTACCCGGCTGAGCCATG	1	1e-05	0
GAATGGCACAGAAGGCCCTAACTTCTACGTGCCCTTCTCCAATGCGACGGGTGTGGTACGCAGCCCCTTCGAGTACCCACAGTACTACCTGGCTGAACCATG	1	1e-05	0
GAATGGCACAGAAGGCCCTAACTTCTACGTGCCCTTCTCCAATG-G-T--GTGTGGTACGCAGCCCCTTCGAGTACCCACAGTACTACCTGGCTGAGCCATG	1	1e-05	0
GAATGGCACAGAAGGCCCTAACTTCTACGTGCCCTTCTCCAAT-CGATGGGTGTGGTACGCAGCCCCTTCGAGTACCCACAGCACTACCTGGCTGAGCCATG	1	1e-05	0
GAATGGCACAGAAGGCCCCAACTTCTACGTGCCCTTCTCCAA--CGATGGGTGTGGTACGCAGCCCCTTCGAGTACCCACAGTACTACCTGGCTGGGCCATG	1	1e-05	0
GAATGGCACAGAAGGCCCTAACTTCTACGTGCCCTTCTCC----CGATGGGTGTGGTACGCAGCCCCTTCGAGTACCCACAGTACTACCTGGCTGAGCCATG	1	1e-05	63A
GAATGGCAC-GA-GGCCCTAACTTCTACGTGCCCTTCTCCAATGCGATGGGTGTGGTACGCAGCCCCTTCGAGTACCCACAGTACTACCTGGCTGAGCCATG	1	1e-05	10GC
GAATGGCACAGAAGGCCCTAACTTCTACGTGCCCTTCTCC----CGATGGGTGTGGTACGCAGCCCCTTCGAGTACCCACAGTACTACCTGGCTGAGCTATG	1	1e-05	0
GAATGACACAGAAGGCCCTAACTTCTACGTGCCCTTCCCCAATGCGATGGGTGTGGTACGCAGCCCCTTCGAGTACCCACAGTACTACCTGGCTGAGCCATG	1	1e-05	0
GAATGGCACAGAAGGCCCTAACTTCTACGTGCCCTTCTCCAATG-GATGGGTGTGGTACGCAGCCCCTTCGAGCACCCACAGTACTACCTGGCTGAGCCATG	1	1e-05	0
GAATGGCACAGAAGGCCCTAACTTCTACGTGCCCTTCTCCAAT-CGATGGGTGTGGTACGCAGCCCCTTCGAGTACCCACAGTACTACCTGACTGAGCCATG	1	1e-05	0
GAATGGCACAGAAGGCCCTAACTTCTACGTGCCCTTCTCCAATGCGATGGGTGTGGTACGCAGCCCCTTCGAGTACCCACAGTACTACCTGGCTGAGCCATG	1	1e-05	48GGGTGA
GAAGGGCACAGAAGGCCCTAAGTTCTACGTGCCCTTCTCCAATGCGATGGGCGTGGTACGCAGCCCCTTCGAGTACCCACAGTACTACCTGGCTGAGCCATG	1	1e-05	0
GAATGGCACAGAAGGCCCTAACTTCTAC---------------GCGATGGGTGTGGTACGCAGCCCCTTCGAGTACCCACAGTACTACCTGGCTGAGCCATG	1	1e-05	0
GAATGGCACGGAAGGCCCTAACTTCTACGTGCCCTTCTCCAA-GCGATGGGTGTGGTACGCAGCCCCTTCGAGTACCCACAGTACTACCTGGCTGAGCCATG	1	1e-05	0
GAATGGCACAGAAGGCCCTAACTTCTACGTGCCCTTCTCCAATGCGATGGGTGTGGTACGCAGCCCCTTCGAGTGCCCACAGTACTACCTGGCTGAGCCATG	1	1e-05	44T
GAATGGCACAGAAGGCCCTAACTTCTACGTGCCCTTCTCCAATGCGACGGGTATGGTACGCAGCCTCTTCGAGTACCCACAGTACTACCTGGCTGAGCCATG	1	1e-05	0
GAATGGCACAGAAGGCCCTAACTTCTACGTGCCCTTCTCCAATG-GATGGGTGTGGTACGCAGCCCCTTCGAGTACCCACAGTACTACATGGCTGAGCCATG	1	1e-05	0
GAATGGCACAGAAGGCCCTAACTTCTACGTGCCCTTCCCCAATGCGACGGGTGTGGTACGCAGCCCCTTCGAGTACCCACAGTACTACCTGGCTGAGCCATG	1	1e-05	0
GAATGGCCCAGAAGGCCCTAACTTCTACGTGCCCTTCTCCAATGCGATGGGCGTGGTACGCAGCCCCTTCGAGTACCCACAGTACTACCTGGCTGAGCCATG	1	1e-05	0
GAATGGCACAGA--GCCCTAACTTCTACGCGCCCCTCTCC-AT-CGATGGGTGTGGTACGCAGCCCCTTCGAGTACCCACAGTACTACCTGGCTGAGCCATG	1	1e-05	11C14C44CC
GAATGGCACAGAAGGCCCTAACTTCTACGTGCCCTTCTCCAATGCGATGGGTGTGGTACGCAGCCCCTTCGAGTGCCCACAGTACTACCTGGCTGAGCCATG	1	1e-05	44A
GAATGGCACAGAAGGCCCTAACTTCTACGTGCCCTTCTCCAA---------------ACGCAGCCCCTTCGAGTACCCACAGTACTACCTGGCTGAGCCATG	1	1e-05	0
GAATGGCACAGAAGGCCCTAACTTCTACGTGCCCTTCTCC----CGATGGGTGTGGTACGCAGTCCCTTCGAGTACCCACAGTACTACCTGGCTGAGCCATG	1	1e-05	0
GAATGGCACAGAAGGCCCTAACTTCTACGTGCCCTTCTCCAATGCGATGGGTGTGGTACGCAGCCCCGTCGAGTACCCACAGTACTACCTGGCTGAGCCATG	1	1e-05	44TT
GAATGGCACAGAAGGCCCTAACTTCTACGTGCCCTTCTCCAATGCGATGGGTGTGGTACGCAGCCCCTTCGAGTACCCACAGTACTACCTGGCTGAGCCATG	1	1e-05	43GAAA
GAATGGCACAGAAGGCCCTAACTTCTACGTGCCCTTC-------CGATGGATGTGGTACGCAGCCCCTTCGAGTACCCACAGTACTACCTGGCTGAGCCATG	1	1e-05	0
GAATGGCACAGCAGGCCCTAACTCCTACGTGCCCTTCTCCAATGCGATGGGTGTGGTACGCAGCCCCTTCGATTACCCACAGTACTACCTGGCTGAGCCATG	1	1e-05	0
GAATGGCACAGAAGACCCTAACTTCTACGTGCCCTTCTCCAATGCGATGGGTGTGGTACGCAGCCCCTTCGAGTACCCACAGTATTACCTGGCTGAGCCATG	1	1e-05	0
GAACGGCACAG-AGGCCC-AA-TT-TATGTGCCCTTCTCCAA--CGA-GGGTGTG---CGCAGCCCCTTCGAG--CCCGCAGTACTACCTGGC-GA-CCATG	1	1e-05	14GC22TT44TCAC51C54G74AG94GA
GAATGGCACAGAAGGCCCTAACTTCTACGTGCCCTTCTCCAATGCGATTGGTGTGGTACGCAGCCCCTTCGAGTACCCACAGTACTACCTGGCTGAGCCATG	1	1e-05	44T
GAATGGCACAGAAGGCCCTAACTTCTACGTGCCCTTCTCCAATGCGATGGGTGTGGTAAGCAGCCCCTTCGAGTACCCACAGTACTACCTGGCTGAGCCATG	1	1e-05	67A
GAATGGCACAGAAGGCCCTAACTTCTACGTGCCCTTCTCCAA-GGGATGGGTGTGGTACGCAGCCCCTTCGAGTACCCACAGTACTACCTGGCTGAGCCATG	1	1e-05	0
GAACGGCACAG-AGGCCC-AA-TT-TATGTGCCCTTCTCCAA--CGA--GGCGTGGT--GCAGCCCCTTCGAG--CCCGCATTACTACCTGGC-GA-CCATG	1	1e-05	14GC22TT44TCAC59GG74AG94GA
GAATGGCACAGAAGGCCCTAACTTCTACGTGCCCTTCTCCAAT---ATGGGTGTGGTACGCAGCCTCTTCGAGTACCCACGGTACTACCTGGCTGAGCCATG	1	1e-05	0
GAATGGCACAGAAGGCCCTAACTTCTACGTGCCCTTCTCCAATG---TGGGTGTGGTACGCAGCCCCTTCGAGTACCCACAGTACTACCTGGCTGAGCAATG	1	1e-05	0
GAATGGCACAGAAGGCCCTAACTTCTACGTGCCCTTCTCCAAT-CGATGGTTGTGGTACGCAGCCCCTTCGAGTACCCACAGTACTACCTGGCTGAGCCATG	1	1e-05	0
GAATGGCACAGAAAGCCCTAACTTCTACGTGCCCTTCTCCAA-GCGATGGGTGTGGTACGCAGCCCCTTCGAGTACCCACAGTACTACCTGGCTGAGCCATG	1	1e-05	0
GAACGACACAG-AGGCCC-AA-TT-TATGTGCCCTTCTCCAA--CGA--GGCGTGGT--GCAGCCCCTTCGAG--CCCGCAGTACTACCTGGC-GA-CCATG	1	1e-05	14GC22TT44TCAC59GG74AG94GA
GAATGGCACAGAAGGTCCTAACTTCTACGTGCCCTTCTCCAATGCGATGGGTGTGGCACGCAGCCCCTTCGAGTACCCACAGTACTACCTGGCTGAGCCATG	1	1e-05	0
GAATGGCACAGAAGGCCCTAACTTCTACGTGCCCTTCTCCAATGCGATGGGTGTGGTACGCAACCCCTTCGAGTACCCACAGTACTACCTGGCTGAGCCATG	1	1e-05	43G
GAATGGCACAGAAGGCCCTAACTTCTGCGTGCCCTTCTCCAATGCGATGGGTGTGGTACGAAGCCCCTTCGAGTACCCACAGTACTACCTGGCTGAGCCATG	1	1e-05	0
GAATGGCACAGAAGGCCCTAACTTCTACGTGCCCTTCTCCAATGCGACGGGTGTGGTACACAGCCCCTTCGAGTACCCACAGTACTACCTGGCTGAGCCATG	1	1e-05	0
GAATGGCACAGAAGGCCCTAACTTCTACGTGCCCTTCTCCAATGCGATGGGTGTGGTACGCAGCCCCTTCGAGTACCCACGGTACTACCCGGCTGAGCCATG	1	1e-05	0
GAATGTCACAGAAGGCCCTAACTTCTACGTGCCC--CTCCAATGCGATGGGTGTGGTACGCAGCCCCTTCGAGTACCCACAGTACTACCCGGCTGAGCCATG	1	1e-05	36CC
GAATGGCACAGAAGGCCCTAACTTCTACGTGCCCTTCTCCAATGCGATGGGTGTGGTACGCAGCCCCTTCGAGTACCCACAGTACTACCTGGCTGAGCCATG	1	1e-05	44TGGCCACTCCCTCTCTGCGCGCTCGCTCGCTCACTGAGGCCGCCCGGGCAAAGCCCGGGCGTCGGGCGAC
GAATGGCACAGAAGGCCCTAACTTCTACGTGCCCTTCTCCAATGCGATGGGTGTGGTACGCAGCCCCTTCGAGTACCCACAGTACTACCTGGCTGAGCCATG	1	1e-05	43G53GTGGTACGCAGCCCCTTC
GAATGGCACAGAAGGCACTAACTTCTACGTGCCCTTCTCCAATGCGATGGGTGTGGTACGCAGCCCCTTCGAGTACCCACAGTACTACCTGGCTGAGCCATG	1	1e-05	40GGGCGACCA51GG54CGCCCGACGCCCGG69CTT
GAATGGCACAGAAGGCCCTAACTTCTACGTGCCCTTCTCCAAT--GATGGGTGTGGTACGCAGCCCCTTCAAGTACCCACAGTACTACCTGGCTGAGCCATG	1	1e-05	0
GAATGGCACAGAAGGCCCTAACTTCTACGTGCCCTTCTCCAATGCGATGGGTGTGGTACGCAGCCCCTTCGAGTACCCACAGTACTACCTGGCTGATCCATG	1	1e-05	44T
GAATGGCACAGAAGGACCTAACTTCTACGAGCCCTTCTCCAATGCGATGGGTGTGGTACGCAGCCCCTTCGAGTACCCACAGTACTACCTGGCTGAGCCATG	1	1e-05	0
GAATGGCACAGAAGGCCCTAACTTCTACGTGCCCTTCTCCAATGCGATGGGTGTGGTACGCAGCCCCTTCGAGTACCCACAGTACTACCTGGCTGAGCCAT-	1	1e-05	100C
GAATGGCACAGAAGGCCCTAACTTCTACGTGCCCTTCTCCAAT-CGATGGGTGTGGTACGCAGCCCCTTCGAGTACACACAGTACTACCTGGCTGAGCCATG	1	1e-05	0
GAATGGCACAGAAGGCCCTAACTTCTACGTGCCCTTCTCCAATGCGATGGGTGTGGTACGCAGCCCCTTCGAGTACCCACAGTACTACCTGGCTGAGCCATG	1	1e-05	44GTCGGGCGGCCTCAGTGAGCGAGCGAGCGCGCAGAGAGGGAGTGGCCAA
GAATGGCACAGAAGGCCCTAACTTCTACGTGCCCTTCTCCAATGCAATGGGTGTGGTACGCAGCCCCTTCGAGTACCCACAGTACTACCTGGCTG-GCCATG	1	1e-05	96T
GAATGGCACAGAAGGCCCTAACTTCTACGTGCCCTTCTCCAATG-GATGGGTGTGGTACGCAGCCCCTTCGAGTACCCACAGTACTACCTGGCTGAGCCATG	1	1e-05	45AG
CAATGGCACAGAAGGCCCTAACTTCTACGTGCCCTTCTCCAA--CGATGGGTGTGGTACGCAGCCCCTTCGAGTACCCACAGTACTACCTGGCTGAGCCATG	1	1e-05	0
GAATGGCACAGAAGGCCCCAACTTCTATGTGCCCTTCTCCAACGCGACGGGCGTGGTACGCAGCCCCTTCGAGCACCCGCAGTACTACCTGGCTGAGCCATG	1	1e-05	0
GAATGGCACAGAAGGCCCTAACTTCTACGTGCCCTTCTCCAATGCGACGGGTGTGGAACGCAGCCCTTTCGAGTACCCACAGTACTACCTGGCTGAGCCATG	1	1e-05	0
GAATGGCACAGAAGGCCCTAACTTCTACGTGCCCTTCTCCAATGCGATGGTTGTGGTACGCAGCCCCTTCGAGTACCCACAGTACCACCTGGCTGAGCCATG	1	1e-05	0
TAATGGCACAGTCGGCCC--ACTT-TA--TGCCCTTCCCCAATGCGATGGGTGTGGTACGCAGCCCCTTCGCGTACCCCCAGTACTACCTGGCTGAGCCATG	1	1e-05	15C21CT28GG
GAATGGCACAGAAGGCCCTAACTTCTACGTGTCCTTCTCCAATGCGATGGGTGCGGTACGCAGCCCCTTCGAGTACCCACAGTACTACCTGGCTGAGCCATG	1	1e-05	0
GAATGGCACAGAAGGCCCTAACTTCTACGTGCCCTTCTCCAATGCGATGGGTGTGGTACGCAGCCCCTTCGAGTACCCACAGTACTACCTGGCTGAGCCATG	1	1e-05	44TTGGCCACTCCCTCTCTGCGCGCTCGCTCGCTCACTGAGGCCGCCCGGGCAAAGCCCGGGCGT
GAATGGCACAGCAGGCCCTAACTTCTACGTGCCCTTCTCTAATGC--TGGGTGTGGTACGCAG--CCTACGAGTACCCACAGTACTAACTGGC--AGCCATG	1	1e-05	43GA64A66A95AT
GAATGGCACAGAAGGCCCTAACTTCTACGTGCCCTTCTCCAAT-CGATGGGTGTGGTACGCAGCCCCTTCGAGTACCCACAGTGCTACCTGGCTGAGCCATG	1	1e-05	0
GAATGGCACAGAAGGCCCTAACTTCTACGTGCCCTTCTCCAA-GCGA-GGGAGTGGTACGCAGCCCCTTCGAGTACCCACAGTACTACCTGGCTGAGCCATG	1	1e-05	38TGGTCGCCCGG51TCAGTGAGCG62GCG68GCGCAGA
GAATGGCACAGAAGGCCCTAACTTCTACGTGCCCTTCTCCAATGCGATGGGTGTGGTACGCAGCCCCTTCGAGTACCCACAGTACTACCTGGCTGAGCCATG	1	1e-05	44GCAAAGCCCGGGCGTCGGGCGACCTTTGGTCGCCCGGCCTCAGTGAGCGAGCGAGCGCGCAGAGAGGGAGTGGCCAACTCC
GAATGGCACAGAAGGCCCTAACTTCTACGTGCCCTTCTCCAA--CGATGGGTGTGGTACGCAGCCCCTTCGAGTACCCACAGTACTACCTGGCTGAGCTATG	1	1e-05	0
GAATGGCACAGAAGGCCCTAACTTCTACGTGCCCTTCTCCAATGCGACGGGTGTGGTACGCAGCCCCTTCGAGTACCCACAGTACTACCTAGCTGAGCCATG	1	1e-05	0
GAATGGCACAGAATGCCCTACCTTCTACGTGCCCTTCCCCAATGCGATGGGTGTGGTACGCAGCCCCTTCGAGTACCCACAGTACTACCTGGCTGAGCCATG	1	1e-05	42C45T
GAATGGCACAGAAGGCCCTAACTTCTACGTGCCCTTCTACAATGCGTTGGGTGTGGTACGCAGCCCCTTCGAGTACCCACAGTACTACCTGGCTGAGCCATG	1	1e-05	0
GAATGGCACAGTAGGCCCTAACTTCTACGTGCCCTTCTCCAATG-GATGGGTGTGGTACGCAGCCCCTTCGAGTACCCACAGTACTACCTGGCTGAGCCATG	1	1e-05	0
GAATCGCACAGAAGGCCCTAACTTCTACGGGCCGTACTCCAATGCGATGGGTGTGGCACGCTGCCCCTTCGAGTACCCACAGTACTACCTGGCTGAGCCATG	1	1e-05	0
GAATGGCACAGAAGGCCCTAACTTTTACGTGCCCGTCTCCAATGCCATGGGTGTGG--CGCAGCCCCTTCGAGTACCCACAGTACTACCTGCCTGAGCCATG	1	1e-05	57CC
GAATGGCACAGAAGGCCCTAACTTCTACGAGCCCTTCTCCAATGCGATGGGTGTGGTACGCAG--CCATCGAGTACCCACAGTAC--CCTGGCTGAGCCATG	1	1e-05	64AA84TT
GAATGGCACAGAAGGCCCTAACTTCTACGTGCCCTTCTCCAAT--GATGGGTGTGGTACGCAGCCCCTTCGAGTACCCACAGTACTTCCTGGCTGAGCCATG	1	1e-05	0
GAATGGCACAGAAGGCCCTAACTTCTACGTGCCCTTCTCCAATG--------------------------------CCACAGTACTACCTGGCTGAGCCATG	1	1e-05	0
GAATGGCACAGAAGGCCCTAACTTCTACGTGCCCTTCTCCAATGCGATGGGCGTCGTACGCAGCCCCTTCGAGTACCCACAGTACTACCTGGCTGAGCCATG	1	1e-05	0
GAATGGCACAGAAGGCCCTAACTTCTACGTGCCCTTCTCCAATGCGATGGGTGTGGTACACAGCCCCTTCGAGTACCCACAGTACTACCTGGCTGAGCCATG	1	1e-05	44C
GAATCGCACAGAAGGCCCTAACTTCTACGTGTCCTTCTCCAATGCGATGGGTGTGGTACGCAGCCCCTTCGAGCACCCACAGTACTACATGGCTGAGCCATG	1	1e-05	0
GAATGGCACAGAAGGCCCTAACTTCTACGTGCCCTTCTCCAATGCGATGGGTGTGGTACACAGCCCCTTCGAGTACCCACAGTACTACCTGGCTGAGCCATG	1	1e-05	44A
GAATGGCACAGAAGGCCCTAACTTCTACATGCCCTTCTCCAACGCGATGGGTGTGGTACGCAGCCCCTTCGAGTACCCACAGTACTACCTGGCTGAGCCATG	1	1e-05	0
GAATGGCACAGGAGGCCCTAACTTCTACGTGCCCTTCTCCAATGCGATGGGTGTGGTACGCAGCCCCTTCGAGTACCCATAGTACTACCTGGCTGAGCCATG	1	1e-05	0
GCATGGCA-A-AAGGCCCTAACTTCTACGTGTCCTTCTCCCATGCGATGGGTGTGGTACGCAGCCCCTTCGAGTACCCACAGTACTACCTGGCTGAGCCATG	1	1e-05	10TA
GAATGGCATAGAAGGCCCTAACTTCTACGTGCCCTTCTCCAATGCGATGGGTGTGGTACGCAGCCCCTTCGAGTACCCACAGTACTACCTGGCTGAGTCATG	1	1e-05	0
GAATGGCCCAGAAGGCCCTAACTTCTACGTGCCCTTCTCCACTGCGATGGGTGTGGTACGCAGCCCCTTCGAGTACCCACAGTACTACCTGGCTGAGCCATG	1	1e-05	0
GAATGGCACAGAAGGCCCTAACTTCTACGTGCCCTTCT--------ATGGGTGTGGTACGCAGCCCCTTCGAGTACCCACAGTACTACCTGGCTGAGCCATG	1	1e-05	55C
GAATGGCACAGAAGGCCCTAACTTCTACGTGCCCTTCTCCAATGCGATGGGTGTGGTACGCAGCCCCTTCGAGTACCCACAGTACTACCTGGCTGAGGCATG	1	1e-05	0
GAAT-GCACAGAAGGCCCTAACTTCTACGTGCCCTTCTCCAATGCGATGGGTGTGGTACGCAGCCCCTTCGAGTACCCACAGTACTACCTGGCTGAGCCATG	1	1e-05	0
GAATGGCACAGAAGGCCCTAACTTCTACGTGCCCTTCTCCAAT------GGTGTGGTACGCAGCCCCTTCGAGTACCCACAGTACTACCTGGCTGAGCAATG	1	1e-05	0
GAATGGTACAGAAGGCCCTAACTTCTACGTGCCCTTCTCCAA--CGATGGGTGTGGTACGCAGCCCCTTCGAGTACCCACAGTACTACCTGGCTGAGCCATG	1	1e-05	0
GAATGGCACAGAAGGCCCTAACTTCTACGTGCCCTTCTCCAAT-CGATGGGTGTGGTACGCAGCCCCTTCGCGTACCCACAGTACTACCTGGCTGAGCCATG	1	1e-05	0
GAATGGCACAGAAGGCCCTAACTTCTACGTGCCCTTCTCCAAT-CGATGGGTGTGGAACGCAGCCCCTTCGAGTACCCACAGTACTACCTGGCTGAGCCATG	1	1e-05	0
GAATGGCACAGAAGGCCCTAACTTCTACGTGCCCTTCTCCAATGCGATGGGT-TGGTACGCAGCCCCTTCGAGTACCCACAGTACTACCTGGCTGAGCCATG	1	1e-05	51C
GAATGGCACAGAAGGCCCTAACTTCTACGTGCCCTTCTCCAAT--GATGGGTGTGGTACGCAGCCCCTTCGAGTACCCACAGAACTACCTGGCTGAGCCATG	1	1e-05	0
GAATGGCACAGAAGGCCCTAACTTCTACTTGCCCTTCTCCAATGCGATGGGTGTGGTACGCAGCCCCTTCGAGTACCCACAGTACTACCTGGCCGAGCCATG	1	1e-05	0
GAATGGCACAGACGGCCCTAACTTCTACGTGCCCTTCTCCAATGCGATGGGTGTGGCACGCAGCTCCTTCAAGTACCCACAGTACTACCTGGCTGAGCCATG	1	1e-05	0
GAATGGCACAGAAGGCCCTAACTTCTACGTGCCCTTCTCAAATGCGACGGGTGTGGTACGCAGTCCCTTCGAGTACCCACAGTACTACCTGGCTGAGCCATG	1	1e-05	0
GAATGGCACAGAAGGCCCCAA-TT-TATGTGCCCTTCTCCAA--CGA--GGCGTGGT--GCAGCCCCTTCGAG--CCCGCAGTACTACCTGGC-GA-CCATG	1	1e-05	22TT44TCAC59GG74GG94GA
GAATGGCACAGAAGGCCCTAACTTCTACGTGCTCTTCTCCAATGCGATGGGTGTGGTACGCAGCCCCTTCGAGTACCCACAGTACTACCTGGCTGAGCCATG	1	1e-05	44CT
GAATGGCACAGAAGGCCCTAACTTCTACGTGCCCTTCTCCAATGCGATGGGTGTGGTACGCAGCCCCTTCGAGTACCCACAGTACTACCTGGCTGAGCCATG	1	1e-05	42TGCGATGGGTG
GAATGGCACAGAAGGCCCTAACTTCTACGTGCCCTTCTCCAA--CGATGGGTGTGGTACGCAGCCCCTTCGAGAACCCGCAGTACTACCTGGCTGAGCCATG	1	1e-05	0
GAACGGCACAG-AGGCCC-AA-TT-TATGTGCCCTTCTCCA---CGA--GGCGTGGT--GCAGCCCCTTCGAG--CCCGCAGTACTACCTGGC-GA-CCATG	1	1e-05	14GC22TT40G44TCAC59GG74AG94GA
GAATGGCAAAGAAGGCCCTAACTTCTACGTGCCCTTCTCCAATGCGATGGGTGTGGTACGCAGCCCC--CGAGTACCCACAGTACTACCTGGCTGAGCCATG	1	1e-05	66CA
GGATGGCACAGAAGGCCCTAACTTCTACGTGCCCTTCTCCAATG----GGGTGTGGTACGCAGCCCCTTCGAGTACCCACAGTACTACCTGGCTGAGCCATG	1	1e-05	0
GAATGGCACAGAAGGCCCTAACTTCTACGTGCCCTTCTCCAATGCGACGGGTGTGGTGCGCAGCCCCTTCGAGTACCCACAGTACTACCTGGCTGAGCCATG	1	1e-05	0
GAATGGCACAGAAGGCCCCAACTTCTACGTGCCTTTCTCCAATGCGATGGGTGTGGTACGCAGCCCCTTCGAGTACCCACAGTACTACCTGGCTGAGCCATG	1	1e-05	0
GAATGGCACAGAAGGCCCTAACTTCTACGTGACCTTCTCCAATGCGACGGGTGTGGTACGCAGCCCCTTCGAGTACCCACAGTACTACCTGGCTGAGCCATG	1	1e-05	0
GAACGGCACAGAAGGCCCTAACTTCTACGTGCCCTTCTCCAATGCGATGGGTGTGGTACGCAGCCCCTTCGAGTACCCACGGTACTACCTGGCTGAGCCATG	1	1e-05	0
GAATGGCACAGAAGGCCCTAACTTCTACGTGCCCTTCTCCAATG-GAAGGGTGTGGTACGCAGGCCCATCGAGTACCCACAGTACTTCCTGGCTTAGCCATT	1	1e-05	0
GAATGGCACAGAAGGCCCTACCTTCTACGTGCCCTTCTCCACTGCGATGGGTGTGGTACGCAGCCCCTTCGAGTACCCACAGTACTACCTGGCTGAGCCATG	1	1e-05	0
GAATGGCACAGAAGGCCCTAACTTCTACGTGCCCTTCTCCAATGCGATAGGTGTGGTACGCAGCCCCTTCGAGTACCCTCAGTACTACCTGGCTGAGCCATG	1	1e-05	0
GAATGGCACAGAAGGCCCTAACTTCTACGTGCCCTTCTCCAATGCGATGGGTGTGGTACGCAGCCCCTTCGAGTACCCACAGTACTACCTGGCTGAGCCATG	1	1e-05	42GGTCGCCCGGCCTCAGTGAGCGAGCGAGCGCGCAGAGAGGGAG87GCCAT
GAATGGCACAGAAGGCCCTAACTTCAACGTGCCCTTCTCCAAT-CGATGGGTGTGGTACGCAGCCCCTTCGAGTACCCACAGTACTACCTGGCTGAGCCATG	1	1e-05	0
GAATGGCACAGAAGGCCCTAACTTCTACGTGCCCTTCTCCAATGCGATGGGTGTGGTACGCAGCCCCTTCGAGTACCCACAGTACTACCTGGCTGAGCCATG	1	1e-05	44ACCCA
GAATGGCACAGAAGGCCCTAACTTCTACGTGCCCTTCTCCAATGCGACGGGTGTGGTACGCAGCCCCTTCGAGTACCCACAGTACTACCTGGCTGCGCC--G	1	1e-05	100T
GAATGGCACAGAAGGCCCTAACTTCTACGTGCCCTTCTCCAATGCGATGGGTGTGCCACGCAGCCCCTTCGAGTACCCACAGCACTACCTGGCTGAGCCATG	1	1e-05	0
GAATGGCACAGAAGGCCCTAACTTCTACGAGCCCTTCTCCAAT-CGATGGGTGTGGTACGCAGCCCCTTCGAGTACCCACAGTACTACCTGGCTGAGCCATG	1	1e-05	0
GAATGGCACAGAAGGCCCTAACTTCTACGTGCCCTTCTCCAATGC-A--------GT-------CCCTTCGAGTACCCACAGTACTACCTGGCTGAGCCATG	1	1e-05	0
AAATGGCACAGAAGGCCCTAACTTCTACGTGCCCTTCTCCAATGCGATGGGTGTGGTACGCAGCCCCTTCGAGTACCCACAGTACTACCTGGCTGAGCCATG	1	1e-05	44C
GAATGGCACAGAAGGCCCTAACTTCTACGTGCCCTTCTCCAATGCGATGGGTGTGGTACGCAGCGCCTTCGAGTACCCACAGTACTACCTGGCTGAGCCATG	1	1e-05	0
GAATGGCACAGAAGGCCGTAACTTCTACGTGCCCTTCTCCAA--CGATGGGTGTGGTACGCAGCCCCTTCGAGTACCCACAGTACTACCTGGCTGAGCCATG	1	1e-05	0
GAATGGCACAGAAGGCCCTAACTTCTACGTGCCCTTCTCCAAT--GATGGGTGTGGTACGCATCCCCTTCGAGTACCCACAGTACTACCTGGCTGAGCCATG	1	1e-05	0
GAATGGCACAGAAGGCCCTAACTTCTACGTGCCCTTCTCCAATGCGATGGGTGTGGTACGCAGCCCCTTCGAGTACCCACAGTACTACCTGGCTGAGCCATG	1	1e-05	44AATGGCAACACCCTGATCGTGAACAATCTGAAC
GAATGGCACAGAAGGCCCTAACTTCTACGTGCCCTTCTCCAAT--GATGGGTGTGGTACGCAGCCCCTTCGAGTACCCACAGTACTACCTGGCTGAGCCATA	1	1e-05	0
GAATGGCACAGAAGGCCCTAACTTCTACGT-------TCC----C------T-TGGTACGCAGCCCCTTCGAGTACCCACAGTACTACCTGGCTGAGCCATG	1	1e-05	0
GAATGGCACAGAAGGCCCTAACTTCTGCGTGCCCTTCTCCAATGCGATGGGTGTGGTACGCAGCCCCTTCGAGTACCCACATTACTACCTGGCTGAGCCATG	1	1e-05	0
GACTGGCACAGAAGGCCCTAACTTCTACGTGCCCTTCTCCAATGCGATGGGCGTGGTACGCAGCCCCTTCGAGTACCCACAGTACTACCTGGCTGAGCCATG	1	1e-05	0
GAATGGCACAGAAGGCCCTAACTTCTACGTGCCCTTCTCCAATGCGACGGGTGTGGTACGCAGCCCCTTCGAGTACCCACAGTACCACCTGGCTGAGCCATG	1	1e-05	0
GAATGGCACAGAAGGCCCTAACTTCTACGTGCCCTTCTCCAA--CGATGGGTGTGGTACGCAGCCCCTTCGAGTACCCACAGTACTACCTGGCTGGGCCATG	1	1e-05	0
GGATGGCACAGAAGGCCCTAACTTCTACGTGCCCTTCTCCAATGCGATGGGTGTGGTAGGCAGCCCCTTCGAGTACCCACAGTACTACCTGGCTGAGCCATG	1	1e-05	0
GAATGGCACAGAAGGCTCTAACTTCTACGTGCCCTTCTCCTATGCGATGGGTG-GG--CGCAGCCCCTTCGAGTACCCACAGTACTACCTGGCTGAGCCCTG	1	1e-05	48GG58C
GAATGGCACAGAAGGCGCTAACTTCTACGTG-CCTTCTCCAATGCGATGGGTGTGGTACGCAGCCCCTTCGAGTACCCACAGTACTACCTGGCTGAGCCATG	1	1e-05	0
GAATGGCACAGAAGGCCCTAACTTCTATGTGCCCTTCTCCACTGCGATGGGTGTGGTACGCAGCCCCTTCGAGTACCCACAGTACTACCTGGCTGAGCCATG	1	1e-05	0
GAATGGCACAGAAGGCCCTAACTTCTACGCGCCCTTCTCCAATGCGATGGGTGTGGTACGCAGCCCCTTCGAGTACCCACAGTACTACCTGGCTGAGCCTTG	1	1e-05	0
GAATGGCACAGAAGGCCCTAACTTCTACGTGCCCTTCTCCAATGC--TGGGTGTGGTACGCAGCCCCTTTGAGTACCCACAGTACTACCTGGCTGAGCCATG	1	1e-05	46AC
GAACGGCACAG-AGGCCC-AA-TT-TATGTGCCCTTCTCCAA--CGA--GGCGTGGT--GCAGCCCCTTCGAG--CCCGCAGTACTACCTGGCTGAACCATG	1	1e-05	14GC22TT44TCAC59GG74AG
GAATGGCACAGAAGGCCCTAACTTCTACGTGCCCTTCTCCAA--CGATGGGTGTGGAACGCAGCCCCTTCGAGTACCCACAGTACTACCTGGCTGAGCCATG	1	1e-05	0
GAATGGCACAGAAGGCCCTAACTTCTACGTGCCCTTCTCCAATGCGGTGGGTGTGGTACGCAACCCCTTCGAGTACCCAAAGTACTTCCTGGCTGAGCCATG	1	1e-05	0
GAACGGCACAGAAGGCCCTAACTTCTACGCGCCCTTCTCCAATGCGATGGGTGTGGTACGCGGCCCCTTCGAGTACCCACAGTACTACCTGGCTGAGCCATG	1	1e-05	0
GAATGGCACAGAAGGCCCTAACTTCTACGTGCCCTT--------CGATGGGTGTGGTACGCAGTCCCTTCGAGTACCCACAGTACTACCTGGCTGAGCCATG	1	1e-05	0
GAATGGCACAGAAGGCCCTAACTTCTACGTGCCCTTCTCCAAT--GATGGGTGTGGTACGCAGCGCCTTCGAGTACCCACAGTACTACCTGGCTGGGCCATG	1	1e-05	0
GAATGGCACAGAAGGCCCTAACTTCTACGTGCCCTTCTCCAATGCGATGGGTGTGGTACGCAGCCCCTTCGAGTACCCACAGTACTACCTGGCTGAGCCATG	1	1e-05	34TCCAAAGGTCGCCCGACGCCCGGGCT62GCCCGGGCGGC76AGTGAGCGAGCGAGCGCG95AGAGAGG
GAATGGCACAGAAGGCCCTAACTTCTACGTGCCCTTCTCCAA--CGATGGGTGTGGTACGCAGCCCCTTCGAGTACCCACAGTACTACCTGGCTGAG--ATG	1	1e-05	96CT
TAATGGCACAGAAGGCCCTAACTTCTACGTGCCCTTCTCCAAAGCGATGGGTGTGGTACGCAGCCCCTTCGAGTACCCACAGTACTACCTGGCTGAGCCATG	1	1e-05	0
GAATGGCACAGAAGGCCCTAACTTCTACGTGCCCTTCTCCAA--CG--GGG-GTGGTACGCAGCCCCTTCGAGTACCCACAGTACTACCTGGCTGAGCCATG	1	1e-05	41CG
GAATGGCACAGAAGGCCCTAACTTCTACGTGCCCTTCTCCAATG-GATGGGTGTGGTACGCAGCCCCTTTGAGTACCCACAGTACTACCTGGCTGAGCCATG	1	1e-05	0
GAATGGCACAGAAGGCCCTAACTTCTACGTGCCCTTCTCCAATGCGATGGGTGTGGTACGCAGCCCCTTCGAGTACCCACAGTACTACCTGGCTGAGCCATG	1	1e-05	42TTGACCAAAGGTCGCCCGACGCCCGGGCTTTGCCCGGGCGGCCTCAGTGAGTGAGCGAGCGCGCAGAGAGGGAGTGGCCAACTCCATCACTAGGGGTTCC
GAATGTCACAGAAGGCCCTAACTTCTACGTGCCCTTCTCCAATGCGATGGGCGTGGTACGCAGCCCCTTCGAGTACCCACAGTACTACCTGGCTGAGCCATG	1	1e-05	0
GAATGGCACAGAAGGCCCTAACTTCTACGTGCCCTTCTCCAACGCGCTGGGTGTGGTACGCAGCCCCTTCGAGTACCCACAGTACTACCTGGCTGAGCCATG	1	1e-05	0
GAATGGCACAGAAGGCCCTAACTTCTACGTGACCTTCTCCAAT-CGATGGGTGTGGTACGCAGCCCCTTCGAGTACCCACAGTACTACCTGGCTGAGCCATG	1	1e-05	0
CAATGGCACAGAAGGCCCTAACTTCTACGTGCCCTTCTCCAATGCGATGGGTGTGGTACGCAGCCCCTTCGAGTACCCACAGTACTACCTGGCTGGGCCATG	1	1e-05	0
GAAT--CACAG-AGGCCC-AA-TT-TATGTGCCCTTCTCCAA--CGA--GGCGTGGT--GCAGCCCCTTCGAG--CCCGCAGTACTACCTGGC-GA-CCATG	1	1e-05	3CG14GC22TT44TCAC59GG74AG94GA
GAATGGCACAGAAGGTCCTAACTTCTACGTGCCCTTCTCCAAT--GATGGGTGTGGTACGCAGCCCCTTCGAGTACCCACAGTACTACCTGGCTGAGCCATG	1	1e-05	0
GAATGGCACAGAAGGCCCTAACTTCTACGTGCCCTTCTCCAAT-CGATGGGTGTGGTACGCAGCCCCTTCGAGTACCCACAGTACTACCTGGCTGAGCCTTG	1	1e-05	0
GAATGGCACAGAAGGCCCTAACTTCTACGTGCCCTTCTCCAA--CGATGGGTGTGGTACGCAGCCCCTTCGAGTACCCACAGTACTACCTGGCCGAGCCATG	1	1e-05	0
GAATGGCACAGAAGGCCCTAACTTCTACGTGCCCTTCTCC----CGATGGGGGTGGTACGCAGCCCCTTCGAGTACCCACAGTACTACCTGGCTGAGCCATG	1	1e-05	0
GAATGGCACAGAAGGCCCTAACTTCTACGTGCCCTTCTCCAATGCGATGGGTGTGATACGCAGCCCCTTCGAGTACCCACAGTACTACCTGGCTGAGCCATG	1	1e-05	44A
GAATGGCACAGAAGGCCCTAACTTCTACGTGCCCTTCTCCAATTCGATGGGTGTGGTACGCAGCCCCTTCAAGTACCCACAGTACTACCTGGCTGAGGCAAG	1	1e-05	0
GAATGGCACAGAAGGCCCTAACTTCTACGTGCCCTTCTCCAATGCGATGGGTGTGGTACGCAGCCCCTTCGAGAACCCGCAGTACTACCTGGCTGAGCCATG	1	1e-05	0
GAATGGCACAGAAGGCCCTAACTTCTACGTGCCCTTCTCCAATG-GATGGGTGGGGTACGCAGCCCCTTCGAGTACCCACAGTACTACCTGGCTGAGCCATG	1	1e-05	0
GAATGGCACATAAGGCCCTAACTTCTACGTGCCCTTCTCCA----------------ACGCAGCCCCTTCGAGTACCCACAGTACTACCTGGCTGAGCCATG	1	1e-05	0
GAATGGCAAAGAAGGCCCTAACTTCAACGTGCCCTTCTCCAATGCGATGGGTGTGGTACGCAGCCCCTTCGAGTACCCACAGTACTACCTGGCTGAGCCATG	1	1e-05	0
GAATGGCACAGAAGGCCCTAACTTCTACGTGCCCTTCTTCAATGCGATGGGTGTGGAACGCAGCCCCTTCGAGTACCCACAGTACTACCTGGCTGAGCCATG	1	1e-05	0
GAATGGCACAGAAGGCCCTAACTTCTACGTGCCCTTCTCCA--GC---------------C-GCCCCTTCGAGTACCCACAGTACTACCTGGCTGAGCCATG	1	1e-05	0
GAATGGCACAGAAGGCCCTAACTTCTACGCGCCCTTCTCCA-----ATGGGTGTGGTACGCAGCCCCTTCGAGTACCCACAGTACTACCTGGCTGAGCCATG	1	1e-05	0
GGACGGCACAG-AGGCCC-AA-TT-TATGTGCCCTTCTCCAA--CGA--GGCGTGGT--GCAGCCCCTTCGAG--CCCGCAGTACTACCTGGC-GA-CCATG	1	1e-05	14GC22TT44TCAC59GG74AG94GA
GAATGGCACAGAAGGCCATAACTTCTACGTGCCCTTCTCCAATGCGACGGGTGTGGTACGCAGCCCCTTCGAGTACCCACAGTACTACCTGGCTGAGCCATG	1	1e-05	0
GAAT-GCACAGAAGGCCCTAACTTCTACGTGCCCTTCTCCAATGCGACGGGTGTGGTACGCAGCCCCTTCGAGTACCCACAGTACTACCTGGCTGAGCCATG	1	1e-05	0
GAATGGCACAGAAGGCCCTAACTTCTACGTGCCCTTCTCCAATGCGATGGGTGTGGTACGCAGCCCCCTCGAGTACCCACAGTACTACCTGGCTGAGCCACG	1	1e-05	0
GATTGGCACAGAAGGCCCTAACTTCTACGTGCCCTTCTCCAATGCGATGGGTGTGGTACGCAGCCCCTTCGAGTACACACAGTACTACCTGGCTGAGCCATG	1	1e-05	0
GAACGGCACAG-AGGCCC-AA-TT-TATGTGCCCTTCTCCAAT-CGATGGGTGTGGTACGCAGCCCCTTCGAGTACCCACAGTACTACCTGGCTGAGCCATG	1	1e-05	14GC22TT
GAATGGCACAGAAGGCCCTAACTTCTACGTGCCCTCCTCCAATGCGATGGGGGTGGTACGCAGCCCCTTCGAGTACCCACAGTACTACCTGGCTGAGCCATG	1	1e-05	0
GACTGGCACAGAAGGCCCTAACTTCTACGTGCCCTTCTCCAATGCGATGGGTGTGGTACGCAGCCCCTTCGAGTACCCACAGTACTACCTGGCTGAGCCATG	1	1e-05	43G
GAATGGCACAGAAGGCCCTAACTTCTACGTGCCCTTCTCCAATGCGATGGGTGTGGTACGCAGCCCCTTCGAGTACCCACAGTACTCCCT-GC-GAGCCATG	1	1e-05	91AC
GAATGGCACAGAAGGCCCTAACTTCTACGTGCCCTTCTCCAAT--GATGGGTGTGGTACGCAGCCCCTTCGAGTATCCACAGTACTACCTGGCTGAGCCATG	1	1e-05	0
GACTGGCACCGACGGCCCGAACTTGTACGGGCCCTTCTCCAATGCGATGGGCGTGGTACGCAGCCCCTTCGAGTACCCACAGTACTAACTGGCTGAGCCATG	1	1e-05	0
GAATGGCACAAAAGGCCCTAACTTCTACGTGCCCTTCTCCAATGCGATGGGTGTGGTACGCAGCCCCTTCGAGTACCCACAGTACTACCTGGCTGAGCCAGG	1	1e-05	0
GAATGGCACAGAAGGCCCTAACTTCTACGTGCCCTGCTCCAA--CGATGGGTGTGGTACGCAGCCGCTTCGAGTACCCACAGTACTACCTGGCTGAGCCATG	1	1e-05	0
GAACGGCACAGAAGGCCCCAACTTCTACGTGCCCTTCTCCAATGCGATGGGCGTGGTACGCAGCCCCTTCGAGCACCCACAGTACTACCTGGCTGAGCCATG	1	1e-05	0
GAATGACACAGAAGGCCCTAACTTCTACGTGCCCTTCTCC----CGATGGGTGTGGTACGCAGCCCCTTCGAGTACCCACAGTACTACCTGGCTGAGCCATG	1	1e-05	0
GAATGGCACAGAAGGCCCTAACTTCTACGTGCCC-TCTCCAATGCGATGGGTGTGGTACGCAGCCCCTTCGAGTACCCACAGTACTACCTGGCTGAGCCATG	1	1e-05	32A
GAATGGCACAGAAGGCCCTAACTTCTACGTGCCCTTCTCCAAT-CGATGGGTGTGGTACGCAGCCCCTTCGAGTACCCACAGTACTACCCGGCTGAGCCATG	1	1e-05	0
GAATGGCACAGAAGGCCCTAACTTCTACGTGCCCTTCTCCAATGCGACGGGTGTGGTGCGCAGCCCCTTCGAGTACCCACAGTACTACCTGGCTGAGTCATG	1	1e-05	0
GAATGGCACAGAAGGCCCTAACTTCTACGTGCCCTTCTCCAATGCGATGGGTGTGGCACGCAGCCCCTTCGAGTACCCACAGTACTACCTGCCTGAGCCATG	1	1e-05	43G
GAATGGCACAGAAGCCCCTAACTTCTACGTGCCCTTCTCCAAT-CGATGGGTGTGGTACGCAGCCCCTTCGAGTACCCACAGTACTACCTGGCTGAGCCATG	1	1e-05	0
GAATGGCACAGAAGGCCCTAACTTCTACGTGCCCTTCTCCAATGCGATGGGTGTGGTACGCAGCCCCTTCGAGTACCCACAGTACTACCTGGCTGAGCCATG	1	1e-05	44GCCGGCCTCAGTGAGCGAGCGAGCGCGCAGAGAGGGAGTGGCCAACTCCATCACTAGGGGTTCCTGCGGCCGGTCGCGTCTA
GAACGGCACAGAGGGCCC-AA-TT-TATGTGCCCTTCTCCAATGCGATGGGTGTGGTACGCAGCCCCTTCGAGTACCCACAGTACTACCTGGCTGAGCCATG	1	1e-05	16A22TT
GAACGGCACAGAA-GTCCTTACTTATACGTGCCCTTCTCCAATGCGAAGGGTGTGGTACGCAGCCCCTTCGAGTACCCACAGTACTACCTGGCTGAGCCATG	1	1e-05	12T
GAATGGCACAGAAGGCCCTAACTTCTACGTGCCCTTCTACAATGCGACGGGTGTGGTACGCAGCCCCTTCGAGTACCCACAGTACTACCTGGCTGAGCCATG	1	1e-05	0
GAATGGCACAGAAGGCCCTATCTTCTACGTGCCCTTCTCCTATGCGATGGGTGTGGCACGCAGCCCCTTCGAGTACCCACAGTACTACCTGGCTGAGCCATG	1	1e-05	0
GAATGGCACAGAAGGCCCTAACTTCTACGTGCCCTTCTCCAATGCGCTGGGTGTGGTACGCAGCCCCATCGAGTACCCACAGTACTACCTGGCTGAGCCATG	1	1e-05	0
GAATGGCACAGAAGGCCCTAACTTCTACGTGCCCTTCTCCAATGCGATGGGTGTGGTACGCAGCCCCTTCGAGTACCCACAGTACTACCTGGCTGAGCCATG	1	1e-05	42GGTCGGGCGGCCTCAG59GAGCGAGCGAGCGCGCA
GAATGGCACAGAAGGCCCTAACTTCTACGTGCCCTTCTCCAATGCGATGGGTGTGGTACACAGCCCCTTCGAGTACCCACAGTACTACCTGGCTGAGCCATG	1	1e-05	43G
GAATGGCACAGAAGGCCCTAACTTCTACGTGCCCTTCTCCAATG---T-GGTGTGGTACGCAGCCCCTTCGAGTACCCACAGTACTACCTGGCTGAGCCATG	1	1e-05	0
GAACGGCACATAAGGCCCTAACTTTTACGTGCCCTTCTCCAATGCGATGGGTGTGGAACGCAGCCCCATCGAGTACCCACAGTACTACCTGGCTGAGTCATG	1	1e-05	0
GAATGGCACAGAAGGCCCTAACTTCTACGTGCCCTTCTCCAATGCGACGGGTGTGGTACGCAGCCCCTTCGAGTACCCACAGTACTACCAGGCTGAGCCATG	1	1e-05	0
GAATGGCACAGAAGGCCCTAACCTCTACGTGCCCTTCTCCAATGCGATGGGTGTGGTACGCAGCTCCTTCGAGTACCTACAGTACTACCTGGCTGAGCCATG	1	1e-05	0
GAATGGCACAGAAGGCCCTAACTTCTACGTGCCCTTCTCCA---CGATGGGTGTGGTACACAGCCCCTTCGAGTACCCACAGTACTACCTGGCTGAGCCATG	1	1e-05	0
GAATGGCACAGAAGGCCCTAACTTCTACGTGTCCTTCTCCAATGCGATGGGTGTTGTACGCAGCCCCTTCGAGTACCCACAGTATTACCTGGCTGAACCATG	1	1e-05	0
GAATGGCCCAGAAGGCCCTAACTTCTACGTGCCCTTCTCCAA--CGATGGGTGTGGTACGCAGCCCCTTCGAGTACCCACAGTACTACCTGGCTGAGCCATG	1	1e-05	0
GAATGGCACAGAAGGCCCTAACTTCTACGTGCCCTTC---------------------CGCAGCCCCTTCGAGTACCCACAGTACTACCTGGCTGAGCCATG	1	1e-05	0
GGATGGCACAGAAGGCCCTAACTTCTACGTGCCCTTCTCCAAT--------------------------------CCCACAGTACTACCTGGCTGAGCCATG	1	1e-05	0
GAATGGCACAGAAGGCCCTAACTTCTACGTGCCCTTCTCCA----------------ACGCAGCCCCTTCGAGTACCCACAGTACTACCTGGCTGAGCCATG	1	1e-05	0
GAATGGCACAGAAGGCCCTAACTTCTACGTGCCCTTCTCCAATG-GATGGGTGTGGTACGCAGCCCCTTCGAGTACCCACAATACTACCTGGCTGAGCCATG	1	1e-05	0
GAACGGCACAG-AGGCCC-AA-TT-TATGTGCCCTTCTCCAA--CGA--GGCGTGGT--GCAGCCCCATCGAG--CCCGCAGTACTACCTGGC-GA-CCATG	1	1e-05	14GC22TT44TCAC59GG74TG94GA
GAATGGCACCGAAGGCCCTAACTTCTACGTGCCCTTCTCCAAT-CGATGGGTGTGGTACGCAGCCCCTTCGAGTACCCACAGTACTACCTGGCTGAGCCATG	1	1e-05	0
GAATGGCACAGAAGGCCCTAACTTCTACGTGCCCTTCTCCAATGCGATGGGTGTGGTACGCAGCCCCTTCGAGTACCTACAGTACTACCTGGCTGAGCCATG	1	1e-05	44GA
GAATGGCACAGAAGGCCCTAACTTCTACGTGCCCTTCTCCAATGCGACGGGTGTGGTACGCAGCCCCTTCGAGTACCCACAGTACTACCTGGCTGAGCCATG	1	1e-05	43GG
GAATGGCACAGATGGCCCTAACTTCTACGTGCCCTTCTCCAATGCGATGGGTGTGGTACGCAGCCCCTTCGAGTACCCACAGTACTACCTGGCTGAGCCATG	1	1e-05	43GC
GAATGGCACAGAAGGCCCTAACTTCTACGTGCCCTTCTCCAATGCGATGGGTGTGGTACGCAGCCCCTTCGAGTACCCACAGTACTACCTGGCTGAGCCATG	1	1e-05	44GGTCGCCCGGCCTCAGTGAGCGAGCGAGCGCGCAGAGAGGGAGTGGCCAACTCCATCACTAGGGGTTCCTGCGGCCTCTAGACTCGAGGGGCAGA
GAATGGCACAGAAGGCCCTAACTTCTACGTGCCCTTCTCCAATGC-----------TACGCAGCCCCTTCGAGTACCCACAGTACTACCTGGCTGAGCCATG	1	1e-05	42T
GAATGGAACAGAAGGCCCTAACTTCTAGGTGCCCTTCTCCAATGCGATGGGTGTGGTACGCAGCCCCTTCGAGTACCCACAGTACTACCTGGCTGAGCCATG	1	1e-05	0
GAACGGCACAGAAGGCCCTAACTTCTACGTGCCCTTCACCAATGCGATGGGTGTGGTACGCAGCCCCTTCGAGAACCCACAGTACTACCTGGCTGAGCCATG	1	1e-05	0
GAATGGCACAGAAGGCCCGAACTTCTACGTGCCCTTCTCCAACGCGATGGGTGTGGTACGCAGCCCCTTCGAGTACCCACAGTACTACCTGGCTGAGCCATG	1	1e-05	0
GAATGGCACAGAAGGCCCTAACTTCTACGTGCCCT------------TGGGTGTGGTACGCAGCCCCTTCGAGTACCCACAGTACTACCTGACTGAGCCATG	1	1e-05	0
GAATGGCACAGAAGGCCCTATCTTCTACGTGCCCTTCTCCAAT-CGATGGGTGTGGTACGCAGCCCCTTCGAGTACCCACAGTACTACCTGGCTGAGCCATG	1	1e-05	0
GAATGGCACAGACGGCCCTAACTTCTACGTGCCCTTCTCCAATG-GATGGGTGTGGTACGCAGCCCCTTCGAGTACCCACAGTACTACCTGGCTGAGCCATG	1	1e-05	0
GAATGGCACAGAAGGCCCTAACTTCTACGTGCCCTTCTCCAATGCGACGGGTGTGGTAAGCAGCCCCTTCGAGTACCCACAGTACTACCTGGCTGAGCCATC	1	1e-05	0
GAATGTCACAGAAGGCCCTAACTTCTACGTGCCCTTCTCCAAT-CGATGGGTGTGGTACGCAGCCCCTTCGAGTACCCACAGTACTACCTGGCTGAGCCATG	1	1e-05	0
GAATGGCACAGAAGGCCCTAACTTCTACGTGCCCTTCTCCA-----ATGGGTGTGATACGCAGCCCCTTCGAGTACCCACAGTACTACCTGGCTGAGCCATG	1	1e-05	0
AAATGGCACAGAAGGCCCTAACTTCTACGTGCCCTTCTCCAAT-CGATGGGTGTGGTACGCAGCCCCTTCGAGTACCCACAGTACTACCTGGCTGAGCCATG	1	1e-05	0
GAATGGCACAGAAGGCCCTAACTTCTACGTGCCCTTCTCCAATGCGATGGGTGTGGTACGCAGCCCCTTCGAGTACCCACAGTACTACCTGGCTGAGCCATG	1	1e-05	36TGGTCGCCCGGC51AGTGAGCGAGCGAGCGCG71GAGAGGG79G81G
GAATGGCACAGAAGGCCCTAACTTCTACGTGCCCTTCTCTAAT-CGATGGGTGTGGTACGCAGCCCCTTCGAGTACCCACAGTACTACCTGGCTGAGCCATG	1	1e-05	0
GAATGGCACAGAAGGCCCTAACTTCTACGTGC--TTCTCCAATGCG-TGGGTGAGGTACGCATCCCCTTCGAGTACCCACAGTACTACCTGGCTGAGCCATG	1	1e-05	31TT47C
GAATGGCACAGAAGGCCCTAACTTCTACGTGCCCTTCTCCAATG-G--GGGTGTAGTACGCAGCCCCTTCGAGTACCCACAGTACTACCTGGCTGAGCCATG	1	1e-05	0
GAATGGCACAGAAGGCCCTAACTTCTACGTGCCCTTCTACAATGCGATGGGTGTGGTACGCAGCCCCTTCGAGTACCCACAGTACTACCTGGCTGAGCCATG	1	1e-05	42TG
GAACGGCACAGAAGGCCCTAACTTCTACGTGCTCTTCTACAATGCGATGGGTGTCGTACGCAGCCCCTTCGAGTACCCACAGTACTACCTGGCTGAGCCATG	1	1e-05	0
GAATGGCACCGAAGGCCCTAACTTCTACGTGCCCTTCTCCAATGCGACGGGTGTGGTACGCAGCCCCTTCGAGTACCCACAGTACTACCTGGCTGAGCCATG	1	1e-05	0
GAATGGCACAGAAGGCCCTAACTTCTACGTGCCCTTCTCCAATGCGACGGGTGTGGTACGCAGCCCCTTCGAGTACCCACAGTACTACCTGTCTGAGCCATG	1	1e-05	0
GAATGGCACAGAAGGCCCTAACTTCTACGTGCCCTTCTCCA-----ATGGGTGTGGTACGCAGCCCCTTCGAGTACCCACAGTACTACCTGGATGAGCCATG	1	1e-05	0
GAATGGCACAGAAGGCCCTAACTTCTACGTGCCCTTCTCCAATGCGATGGGTGTGGTACGCAGCCCCTTCGAGTACCCTCAGTACTACCTGGCTGAGCCATG	1	1e-05	44T
GATTGGCACAGAAGGCCCTAACTTCTACGTACCCTTCTCCAATGCGATGGGTGTGGTACGCAGCCCCTTCGAGTACCCACAGTACTACCTGGCTGAGCCATG	1	1e-05	0
GAATGGCACAGAAGGCCCTAACTTCTACGTGCCCTTCTCCAAT--GATGGGTGTGGGACGCAGCCCCTTCGAGTACCCACAGTACTACCTGGCTGAGCCATG	1	1e-05	0
GAATGGCACAGAAGGCCC--------------------------CGATGGGTGTGGTACGCAGCCCCTTCGAGTACCCACAGTACTACCTGGCTGAGCCATG	1	1e-05	0
GAATGGCAAAGAAGGCCCTTACTTCTACGTGCCCTTCTCCAATGCGATGGGTGTGGTACGCAGCCCCTTCGAGTACCCACAGTACTACCTGGCTGAGCCATG	1	1e-05	0
GAATGGCACAGAAGGCCCTAACTTCTACATGCCCTTCTCCAAT---ATGGGTGTGGTACGCAGCCCCTTCGAGTACCCACAGTACTACCTGGCTGAGCCATG	1	1e-05	0
GCATGGCACAGAAGGCCCTAACTTCTACGTGCCCTTCTCCAATGCGATGGGTGTGGTACGCAGCCCCTTCGCGCACCCACAGTCCTACCTGGCTGAGCCAGG	1	1e-05	0
GAATGGCACAGAAGGCCCTACCTTCTCCGTGCCCTTCTCCAATGCGATGGGTGTGGTACGCAGCCCCTTCGAGTACCCACAGTACTACCTGGCTGAGCCATG	1	1e-05	0
GAACGGCACAGAAGGCCCTAACTTCTACGTGCCCTTCTCCAATGCGATGGGTGTGGTACGCCGCCCCTTCGAGTACCCACAGTACTACCTGGCTGAGCCATG	1	1e-05	0
GAATGGCACAGAAGGCCCTAACTTCTACGTGCCCTTCTCCAATGCGATGGGTGTGGTACGCATCCCCTTCGAGTACCTACAGTACTACCTGGCTGAGCCATG	1	1e-05	44CC
GAATGGCACAGAAGGCCCTAACTTCTACGTGCCCTTCTCCAATGCGA------TGGTACGCAGCCCATTCGAGTACCCACAGTACTACCTGGCTGAGCCATG	1	1e-05	0
GAATGGCACAGAAGGCCCTAACTTCTACGTGCCCTTCTCCAATGGGATGGGTATGGTACGCAGCCCCTTCGAGTACCCACAGTACTACCTGGCTGAGCCATG	1	1e-05	0
GAATGGCACAGACGGCCCTAACCTCTACGTGCCCTCCTCCAATGCGATGGGTGTGGTACGCAGCCCCTTCGAGTACCCACAGTACTACCTGGCTGAGCCATG	1	1e-05	0
GAATGGCACAGAAGGCCCTAACTTCTACGTGCCCTTCTCCAATGCGATGGGTGTGGTGCGCAGCCCCTTCGAGTACCCACAGTACTACCTGACTGAGCCATG	1	1e-05	0
GAATGGCACAGAAGGCCCTAACTTCTACGCGCCCTTCTCCAATGCGATGGGTGTGGTACGCAGCCCCTTCGAGTACCCACAGTACCACCTGGCTGAGCCATG	1	1e-05	0
GAATGGCACAGAAGGCCCTAACTTCTACGTGCCCTTCTCCAATGCCACGGGTGTGGTACGCAGCCCCTTCGAGTACCCACAGTACTACCTGGCTGAGCCATG	1	1e-05	0
GAATGGCACAGAAGGCCCTAACTTCTACGTGCCCTTCTCCAACGCGATGGGTGTGGTACGCAGCCCCTTCGAGTACCCACAGTACTACCTGGCTGAGCCACG	1	1e-05	0
GAATGGCACAGGAGGCCCTAACTTCTACGTGCCCTTCTCCAATGCGATGGGTGTGGTACGCAGCCCCTTCGAGTACCCACAGTACTACCTGGCTGAGCCATG	1	1e-05	43G
GAATGGCACAGCAGGCCCTAAATTCTACGTGCCCTTCTCCAATGCGACGGGTGTGGTACGCAGCCCCTTCGAGTACCCACAGTACTACCTGGCTGAGCCATG	1	1e-05	0
GAATGGCACAGAAGGCCCTAACTTCTACGTGCCCTTCTCCAATGCGATGGGTGTGGTACGCAGCACCTTCGAGTACCCACAGTACTACCTGGCTGAGCCATG	1	1e-05	43GC
GAATGGCACAGAAGGCCCTAACTTCTACGTGCCCTTCTCCAA--CGATGGGTGTGGTGCGCAGCCCCTTCGAGTACCCACAGTACTACCTGGCTGAGCCATG	1	1e-05	0
GAACGGCACAG-AGGCCC-AA-TT-TATGTGCCCTTCTCCAA--CGA--GGCGTGGT--GCAGCCCCTTCGAGT--CCGCAGTTCTACCTGGC-GA-CCATG	1	1e-05	14GC22TT44TCAC59GG73CA94GA
GAATGGCACAGATGGCCCTAACTTCTACGTGCCCTTCTCCAATG---TGGGTGTGGTACGCAGCCCCTTCGAGTACCCACAGTACTACCTGGCTGAGCCATG	1	1e-05	0
GAATTGCACAGAAGGCCCTAACTTCTACGTGCCCTTCTCCAATGCGATGGGTGTGGTACGCCGCCCCTTCGATTACCCACAGTACTAACTGCCTGAGCCATG	1	1e-05	0
GAATGGCACAGAAGGCCCTAACTTCTACGTGCCCTTTTCCAATGCGATGGGTGTGGTACGCAGCCCCTTCGAGTACCCACTGTACTACCTGGCTGAGCCCTG	1	1e-05	0
GAACGGCACAGAAGGCCCTAACTTCTAGGTGCCCTTCTCCAATGCGATGGGTGTGGTACGCAGCCCCTTCGAGTACCCACAGTACTACCAGGCTGAGCCTTG	1	1e-05	0
GAATGGCACAGAAGGCCCTAACTTCTACGTGCCCTTCTCCAATGCGATGGGTGTGGTACGCAGCCCCTTCGAGTACCCACAGTACTACCTG---GAGCCATG	1	1e-05	94GAA
GAATGGCACA-AAGGCCCTAACTTCCACGTGCCCCTCTCCCATGCGATGGGTGTGGTACGCAGCCCCTTCGAGTACCCACAGTACTACCTGGCTGAGCCATG	1	1e-05	7C
GAATGGCACAGAAGGCCCTAACTTCTACGTTCCCTTCTCCA---CGATGGGTGTGGTACGCAGCCCCTTCGAGTACCCACAGTACTACCTGGCTGAGCCATG	1	1e-05	0
GAATGGCACAGAAGGCCCTAACTTTTACGTGCCCTTCTCCAA--CGATGGGTGTGGTACGGAGCCCCTTCGAGCACCCGCAGTACTACCTGGCTGAACCATG	1	1e-05	44CC
GAATGGCACAGAAGGCCCTAACTTCTACGTGCCCTTCTCCAATGCGATGGGTGTGGTACGCAGCCCCTTCGAGTACCCACAGTACTACCTGGCTGAGCCATG	1	1e-05	44GCCAGGATGATCAGTATTTCTTCAGATGACGC
GAATGGCACAGAAGGCCCTATCTTCTACGTGCCCTTCTCCATTGCGATGGGTGTGGTACGCAGCCCCTTCGAGTACCCACAGTACTACCTGGCTGAGCCATG	1	1e-05	0
#NAME?	1	1e-05	0
GAATGGCACAGAAGGCCCTAACTTCTACGTGCCCTTCTCCAAT-CGATGGGTATGGTACGCAGCCCCTTCGAGTACCCACAGTACTACCTGGCTGAGCCATG	1	1e-05	0
GAATGGCACAGAAGGCCCTAACTTCTACGTACCCTTCTCCAATGCGACGGGTGTGGTACGCAGCCCCTTCGAGTACCCACAGTACTACCTGGCTGAGCCATG	1	1e-05	0
GAATGGCACAGAAGGCCCTAACTTCTACGTGCCCTTCTCCAATGCGACGGGCGTGGTACGCAGCCCCTTCGAGTACCCACAGTACTACCTGGCTGAACCATG	1	1e-05	0
GAATGTCACAGAAGGCCCTAACTTCTACGTGCCCTTCTCCAATGCGATGGGTGTGGTACTCAGCCCCTTCGAGTACCCACAGTACTACCTGGCTGAGCCATG	1	1e-05	0
GAATGGCACAGAAGGCCCTAACTTC--CG-GCCCCTCTCCAATGCGATGGGTGTGGTACGCAGCCCCTTCGAGTACCCACAGTACTACCTGGCTGAGCCATG	1	1e-05	25AAG
GAATGGCACAGAAGGCCATAACTTCTACGTGCCCTTCCCCAATGCGATGGGTGTGGAACGCAGCACCATCGAGTACCCACAGTACTACCTGGCTG-GC-ATG	1	1e-05	96GT
GAATGGCAAAGAAGGCCCTAACTTCTACGTGCCCTTCTCCAAT--GATGGGTGTGGTACGCAGCCCCTTCGAGTACCCACAGTACTACCTGGCTGAGCCATG	1	1e-05	0
GAATGGCACAGAAGGCCCTAACTTCTACGGGCCCTTCTCCAATGCGATGGGTGTGGTACGCAGCCCCTTCGAGTACCCACAGTACTACCTGGCCGAGCCATG	1	1e-05	0
GAATGGCACAGAAGGCCCTAACTTCTACGTGCCCTTCTCCAATGCGATGGGTGTGGTACGCAGCCCCTTCGAGTACCCACAGTACTACCTGGCTTAGCCATG	1	1e-05	44C
GAATGGCACAGAAGGCCCTAACTTCCACGTGCCCTTCTCCAATGCGATGGGTGTGGTACGCAGCCCCTTCGAGTACCCACAGTACTACCTGGCTGAGCCATG	1	1e-05	43G
GAATGGCACAGAAGGCCCTAACTTCTACGTGCCCTTCTCCAATGCGATGGGTGTGGTACGCAGCCCCTTCGAGTACCCACAGTACTACCTGGCTGAGCCATG	1	1e-05	43GACATCACTTTCCCAGTTTACCCCGCGCCACCTTCTCTAGGCACCG
GAATGGCACAGAAGGCCCTAACTTCTACGTGCCCTTCTCCAATGCGATGGGTGTGGTACGCAGCCCCTTCGAGTACCCACAGTACTACCTGGCTGAGCCATG	1	1e-05	44GCCACTCCCTCTCTGCGCGCTCGCTCGCTCACTGAGGCCGCC88GGCAA94GCCCGGGCG
GAATGACACAGAAGGCCCTAACTTCTACGTGCCCTTCTCCAA-GCGATGGGTGTGGTACGCAGCCCCTTCGAGTACCCACAGTACTACCTGGCTGAGCCATG	1	1e-05	0
GAATGGCACAGAAGGCCCTAACTTCTACGTGCCCTTCTCCAATGCGATGCGTGTGGTACGCAGCCCCTTCGAGTACCCACAGTACTACCTGGCTGAGCCATG	1	1e-05	43G
GAATGGCACAGAAGGCCCTAACCTCTACGTGCCCTTCTCCAATGCGATGGGTGTGGCACGCAGCCCCTTCGAGTACCCACAGTACTACCTGGCTGAGCCATG	1	1e-05	0
GAATGGCACAGAAGGCCCTAACTTCTACGTGCCCTTCTCCAATGCAACGGGTGGGGTACGAAGCCCCTTCGAGTACCCACAGTACTACCTGGCTGAGCCATG	1	1e-05	0
TAACGGCACAG-AGGCCC-AA-TT-TATGTGCCCTTCTCCAA--CGA--GGCGTGGT--GCAGCCCCTTCGAG--CCCGCAGTACTACCTGGC-GA-CCATG	1	1e-05	14GC22TT44TCAC59GG74AG94GA
GAATGGCACAGAAGGCCCTAACTTCTACGTGCCCTTCTCCAATGCGATGGGTGTGGTACGCAGCCCCTTCGAGCACCCCCAGTACTACCTGGCTGAGCCATG	1	1e-05	0
GAATGGCACAGAAGGCCCTAACTTCTACGTGCCCTTCTCCAATGCAATGGGTGTGGTACGCAGCCCCTTCGAGTACCCACAGTACTACCTGGCTGAGCCATG	1	1e-05	44T
GAATGGCACAGAAGGCCCTAACTTCTACGTGCCCTTCTCCAATGCGATGGGTGTGGTACGCAGCCCCTTCGAGTACCAACAGTACTACCTGGCTGAGCCATG	1	1e-05	44A
GAATGGCACAGAAGGCCCTAACTTCTACTTGCCCTTCTCCAA--CGA--GGCGTGGT--GCAGCCCCTTCGAG--CCCGCAGTACTACCTGGC-GA-CCATG	1	1e-05	44TCAC59GG74AG94GA
GAATGGCACAGAAGGCCCTAACTTCTACGTGCCC-TC-CCAATGCGATGGGTGTGGTCCGCAGCCCCTTCGAGTACCCACATTACTACCTGGCTGAGCCATG	1	1e-05	35CC
#NAME?	1	1e-05	0
GAATGGCACAGAAGGCCCTAACTTCTACGCGCCCTTCTCCAATG-GATGGGTGTGGTACGCAGCCCCTTCGAGTACCCACAGTACTACCTGGCTGAGCCATG	1	1e-05	0
GAATGGCACAGAAGGCCCTAACTTCTACGTGCCCTTCTCCAATG-GATGGGTGTGGTACGCAGCCCCTTCGAGTACCCACAGTACTACCTGGCTAAGCCATG	1	1e-05	0
GAATGGCACAGGAGGCCCTAACTTCTACGTGCCCTTCTCCACTGCGATGGGGGTGGTACGCAGCCCCTTCGAGTACCCACAGTACTACCTGGCTGAGCCATG	1	1e-05	0
GAATGGCACAGAAGGCCCTAACTTCTACGTGCCCTTCTCCAATGCGATGGGTGTGGTACGCAGCCCCTTCGAGTACCCACAGTACTACCTGGCTGAGTCATG	1	1e-05	44C
GAATGGCACAGAAGGCCCTAACTTCTACGTGCCCTTCTCCAATGCGATGGGTGTGGTACGCAGCCCCTTCGAGTACCCACAGTACTACCTGGCTGAGTCATG	1	1e-05	44A
GAATGGCACAGAAGGCCCTAACTTCTACGTGCCCTTCTCCAATG----GGGTGTGGTACGCAGCCCCTTCGAGTACCCACAGTAGTACCTGGCTGAGCCATG	1	1e-05	0
GAATGGCACAGAAGGCCCTAACTTCTACGTGCCCTTCTCCAATGCGATGGGTGTGGTACGCAGCCCCTTCGAGTACCCACAGTACTACCTGGCTGAGCCATT	1	1e-05	44T
GGATGGCGCAGAAGGCCCTAACTTCTACGTGCCCTTCTCCAATGCGATGGGTGTGGTACGCAGCCCCTTCGAGTACCCACAGTACTACCTGGCTGAGCCATG	1	1e-05	0
GAATGGCACAGAAGGCCCTAACTTCTACGTGCCCTTCTCCAAT------GGTGTGGTACGCAGCCCCTTCGAGTACCCACAGTACTACCTGGCTGTGCCATG	1	1e-05	0
GAATGGCACAGAAGGCCCTAACTTCTACGTGCCCTTCTCCAATGC------------A-GC--CCCC-TCGAGTACCCACAGTACTACCTGGCTGAGCCATG	1	1e-05	0
GAATGGCACAGAAGGCCCTAACTTCTACGTACCCTTCTCCAATGCGATGGGTGTGGTACGCAGCCCCTACGAGTACCCACAGTACTACCTGGCTGAGCCATG	1	1e-05	0
GAACGGCACAG-AGGCCC-AA-TT-TATGTGCCCCTCTCCAA--CGA--GGCGTGGT--GCAGCCCATTCGAG--CCCGCAGTACTACCTGGC-GA-CCATG	1	1e-05	14GC22TT44TCAC59GG74AG94GA
GAATGGCACAGAAGGCCCTAACTTCTACGTGCCCTTCTCCAA--CGATGGGTGTGGTACGCAGCCCCTTCGAGTACCCACAGCACTACCTGGCTGAGCCATG	1	1e-05	0
GAATGGCACAGAAGGCCCTAACTTCTACGTGGCCTTCTCCAATGCGATGGGTGTGGTACGCAGCCCCTTCGAGTACCCACAGTACTACCTGGCTGAGCCCTG	1	1e-05	0
GAATGGCACAGAAGGACCTAACTTCTACGTGCCCTTCTCCAATGCGACGGGTGTGGTACGCAGCCCCTTCGAGTACCCACAGTACTACCTGGCTGAGCCATG	1	1e-05	0
GAATGGCACAGAAGGCCCTAACTTCTACGGGCCCTTCTCCA-----ATGGGTGTGGTACGCAGCCCCTTCGAGTACCCACAGTACTACCTGGCTGAGCCATG	1	1e-05	0
GAATGGCACAGAAGGCCCTAACTTCTACGTGCCCTTCTCCAATGCGATGGCTGTGGTACGCAGCCCCTTCGAGTACCCACAGTATTACCTGGCTGAGCCATG	1	1e-05	0
GAATGGCACAGAAGGCCCTAACTTCTACGTGCCCTTCTCCAAT-CGATGGGTGTGGTAGGCAGCCCCTTCGGGTACCCACAGTACTACCTGGCTGAGCCATG	1	1e-05	0
GAATGGCACAGAAGGCCCTAACTTCTACGTGCCCTTCTCCAATGCGATGGGTGTGGTACGCAGCCCCTTCGAGTACACACAGTACTACCTGGCAGAGCCATG	1	1e-05	43GC
GAATGGCACAGAAGGCCCTAACTTCTACGTGCCCTTCTCCAATGCGATGGGTGTGGTACGCAGCCCCTTCGAGTACCTACAGTACTACCTGACTGAGCAATG	1	1e-05	0
GAATGGCACGGAAGGCCCTAACTTCTACGTGCCCTTCTCCAATGCGATGGGTGTGGTACGCAGCCCCTTCGAGTACCCACAGTACTACCTGGCTGAGCCATG	1	1e-05	43GC
#NAME?	1	1e-05	0
GAATGGCACAGAAGG-CCTAACTTCTACGTGCCCTTCTCCAATG---TGGGTGTGGTACGCAGCCCCTTCGAGTACCCACAGTACTACCTGGCTGAGCCATG	1	1e-05	0
GAATGGCACAGAAGGCCCTAACTTGTACGTGCCCTTCTCCAATGCGATGGGTGTGGTACGCAGCCCCTTCGAGTACCCACAGTACTACCTGGCTGAGCCATG	1	1e-05	43G
GAATGGCACAGAAGGCCCTAACTTCTACGTGCCCTTCTCTAATGCGATGGGTGTGGTACGCAGCCCCTTCGAGTACCCACAGTACTACCTGGCTGGGCCATG	1	1e-05	0
GAATGGCACAGAAGGCCCTAACTTCTACGTGCCCTTCTCCAATGC--TGGGTGTGGTATGCAGCCCCTTCGAGTACCCACAGTACTACCTGGCTGAGCCATG	1	1e-05	46AC
GAATGGCACAGAAGGCCCTAACTTCTACGTGCCCTTCTCCAATGCGATGGGTGTGGTACGTAGCCCCTTCGAGTACCCACGGTACTACCTGGCTGAGCCATG	1	1e-05	0
GAATGGCACAGAAGGCCCTAACTTCTACGTGCCCTTCTCCAATGCGATGGGTGTGGTACGCAGCCCCTTCGAGTACCCACAGTACTACCTGGCTGAGCCATG	1	1e-05	45C
#NAME?	1	1e-05	0
GAATGGCACAGAAGGCCCTAACTTCTACGTGCCCTTCTCCAATGCGATGGGTGTGGTACGCAGCCCCTTCGAGTACCTACAGTACTATCTGGCTGAGCCATG	1	1e-05	0
GAATGGCACAGAAGGCCCTAACTTCTACGTGCCCTTCTCCAAT-CGATGGGTGTGGTACGCAGCCCCTTCGAGTACCCACAGTACTACCTGGCTGATCCATG	1	1e-05	0
GAATGGCACAGAAGGACCTAACTTCTACGTGCCCTTCTCCAATGCGATGGGTGCGGTACGCAGCCCCTTCGAGTACCCACAGTACTACCTGGCTGAGCCATG	1	1e-05	0
GAATGGCACAGAAGGCCCTAACTTCTACGTGCCCTTCTCCAATG-GATGGGTGTGGTACGCAGCCCCTTCGAGTACCCACAGTAGTACCTGGCTGAGCCATG	1	1e-05	0
GAATGGCACAGAAGGCCCTAACTTCTACGTGCCCTTATCCAATGCGATGGGCGTGGTACGCATCCCCTTCGAGTACCCACAGTACTACCTGGCTGAGCCATG	1	1e-05	0
GACTGGCACAGAAGGCCCTAACTTCTACGTGCCCTCCTCCAATGCGATGGGTGTGGTACGCAGCCCCTTCGAGTCCCCACAGTACTACCTGGCTGAGCCATG	1	1e-05	0
GAATGGCACAGAAGGCCCTATCTTCTACGTGCCCTTCTCCAATGCGTTGGGTGTGGTACGCAGCCCCTTCGAGTACCCACAGTACTACCTGGCTGAGCCATG	1	1e-05	0
GAATGGCACAGAAGGCCCTAACTTCTACGTGCCCTTCTCCAATGCGACGGGTGTGGTACGCAGCCCCATCGAGTACCCACAGTACTACCTGGCTGAGCCATG	1	1e-05	0
GAACGGCACAG-AGGCCC-AA-TT-TAC--GCCCTTCTCCAA--CGA--GGCGTGGT--GCAGCCCCTTCGAG--CCCGCAGTACTACCTGGC-GA-CCATG	1	1e-05	14GC22TT27TG44TCAC59GG74AG94GA
GAATAGCACAGAAGGCCCTAACTTCTACGTGCCCTTCTCCAATGCGATGGGTGGGGTACGCAGCCCCTTCGAGTACCCACAGTACTACCTGGCTGAGCCATG	1	1e-05	0
G-ATGGCACAGAAGGCCCTAACTTCTACGTGCCCTTCTCCAATGCGATGGGTGTGGTACGCAGCCCCTTCGAGTACCCACAGTACTACCTGGCTGAGCCATG	1	1e-05	0
GAGTGGCACAGAAGGCCCTAACTTCTACGTGCCCTTCTCCAATGC---GGGTGTGGTACGCAGCCCCTTCGAGTACCCACAGTACTACCTGGCTGAGCCATG	1	1e-05	0
GAATGGCACAGAAGGCCCTAACTTCTACGTGCCCTTCTCCAATGCGATGGGTGTGGTACGCAGCCCCTTCGAGTACCCACAGTACTACCTGGCTGAGCCATG	1	1e-05	43GGCGCGCTCGCTCGCTCACTGAGGCCGGGCGACCAAAGGTCGCCCGACGCCCGG
GAATGGCACAGAAGGCCCTAACTTCTACGTGCCCTTCTCCAAAGCGATGGGTGTGGTACGCAGCCCCTTCGAGTACCCACAGTACTACCTGGCTGAGCTATG	1	1e-05	0
GAATGGCACAGAAGGCCCTAACTTCTACGTGCCCTTCTCCAATGCGACGGGTGCGGTACGCAGCCCCTTCGAGTACCCACAGTACTACCTGGCCGAGCCATG	1	1e-05	0
GAATGGCACAGAAGGCCCTAACTTCTACGTGCCCTTCTCCAATGCGATGGGTGTGGTACGCAGCCCCTTCGAGTACCCACAGTACTACCTGGCTGAG-CATG	1	1e-05	0
GAACGGCACAG-AGGCCC-AA-TT-TATGTGCCCTTCTCCAA--CGA--GGTGTGGTACGCAGCCCCTTCGAGTACCCACAGTACTACCTGGCTGAGCCATG	1	1e-05	14GC22TT44TCAC
GAATGGCACAGAAGGCCCTAACTTCTACGTGCCCTTCTCCAATGCGATGGGTGTGGTACG--GCCCCTTCGAGTACCCACAGTACTACCTGGCTGGGCCATG	1	1e-05	57AC
GAATGGAACAGAAGGCCCTAACTTCTACGTGCCCTTCTCCAATGCGACGGGTGTGGTACGCAGCCCCTTCGAGTACCCACAGTACTACCTGGCTGAGCCATG	1	1e-05	0
GAATGGCACGGAAGGCCCTAACTTCTACGTGCCCTTCTCCAATG-GATGGGTGTGGTACGCAGCCCCTTCGAGTACCCACAGTACTACCTGGCTGAGCCATG	1	1e-05	0
GAATGGCACAGAAGGCCATAACTTCTACGTGCCCTTCTCCAATGCGATGGGTGTGGTACGCAGCCCCTTCGAGTACCCACAGTATTACCTGGCTGAGCCATG	1	1e-05	0
GAATGGCACAGAAGGCCCTAACTTCTACGTGCCCTTTTCCAATGCGATGGGTGTGGTACGCAGCCCTTTCGAGCACCCACAGTACTACCTGGCTGAGCCATG	1	1e-05	43G
GAATGGCACAGAAGGCCCTAACTTCTACGTGCCCTTCTCCAATGCGATGGGTGTGGTACGCAGCCCCTTCGAGTACCCACAGTACTACCGGGCTGAGCCATG	1	1e-05	43G
GAATGGCACAGAAGGCCCTAACTTCTACGTGCCCTTCTCCAATGCGATGGGTATGGTACGCAGCCCCCTCGAGTACCCACAGTACTACCTGGCTGAGCCATG	1	1e-05	0
GAATGGCACAGAAGGCCCTAACTTCTACGTGCCCTTCTCCAATGCGATGGGTGTGGTACGCAGCCCCTTCGAGTACCCACAGTACTACCTGGCTGAGCCATG	1	1e-05	44GGCCACTCCCTCTCTGCGCGCTCGCTCGCTCACTGAGGCCGGGC
GAATGGCACAGAAGGCCCTAACTTCTACGTGCCCTTCTCCAATGCGATGGGTGTGGTATGCAGTCCCTTCGAGTACCCACAGTACTACCTGGCTGTGCCATG	1	1e-05	0
GAATGGCACAGAAGGCCCTAACTTCTACGTGCCCTTCTCCAATGC-ATGGGTGTGGTACGCAGCCCCTTCGAGTACCCACAGTACTACCTGGCTGAGCCATG	1	1e-05	44GC
GAATGGCACAGAAGGGCCTAACTTCTACGTGCCCTTCTCCAAT--GATGGGTGTGGTACGCAGCCCCTTCGAGTACCCACAGTACTACCTGGCTGAGCCATG	1	1e-05	0
GAATGGCACAGAAGGCCCTAACTTCTACGTTCCCTTCTCCAATG-GATGGGTGTGGTACGCAGCCCCTTCGAGTACCCACAGTACTACCTGGCTGAGCCATG	1	1e-05	0
GAATGGCACAGAAGGCCCTAACTTCTACGTGCCCTTCTCCAATGCGATGGGTGTGGTACGCAGCCACTTCGAGTACCCACAGTACTACCTGGCTGAGTCATG	1	1e-05	0
GAATGGCACAGAAGGCCCTAACTTCTACGTGCCCTTCTCCAATGGGATGGGTGTGGTACGCAGCCCCTCCGAGTACCCACAGTACTACCTGGCTGAGCCATG	1	1e-05	0
GAATGGCACAGAAGGCCCAAACTTCTACGTGCCCTTCTCCAATGCGATGGGTGTGGTACGCAGCCCCTTCGAGTACCCACAGTACTACCTGGCTGAGCCGTG	1	1e-05	0
GAATGGCACAGACGGCCCTAACTTCTACGTGCCTTTCTCCAATGCGATGGGTGTGGTACGCAGCCCCTTCGAGTACCCACAGTACTACCTGGCTGAGCCATG	1	1e-05	0
GAATGGCACAGAAGGCCCTAACTTCTACGTGCCCTTCTCCAATGCGATGGGTGTGGCACGCAGCCCCTTCGAGTACCCACAGTACTACCTGGCTGAGCCATG	1	1e-05	43GCGATG
GAATGGCACAGAAGGCCCTAACTTCTACGTGCCCTTCTCCAATGCGATGGGTGTGGTACGCAGCCCCTTCGAGTACCCACAGTACTACCTGGCTGAGCCATG	1	1e-05	44CCACTCCCTCTCTGCGCGCTCGCT70CTC74C76GAGGCCGCCCG
GAATGGCACAGAAGGCCCTAACTTCTACGTGCCCTTCTCCAATGCGATGGGTGTGGTACGCAGCCCCTTCGAGTACCCACAGTACTACCTGGCTGAGCCATG	1	1e-05	44TACCACGACATCAAGGACATTACCGCCCGGAAAGAGATTATTGAGAACGCCGAGCTGCTGGATCAGATTGCCAAGATTT
GAATGGCACAGAAGGCCCTAACTTCTACGCGCCCTTCTCCAATGCGATGGGTGTGGTACGCAGCCCCTTCTAGTACCCACAGTACTACCTGGCTGAGCCATG	1	1e-05	0
GAATGACACAGAAGGCCCTAACTTCTACGTGCCCTTCTCCAATGCGATGGGTGTGGTACGCAGCCCCTTCGAGTACCCACGGTACTACCTGGCTGAGCCATG	1	1e-05	0
GAATGGCACAGAAGG-CCTAACTTCTACGTGCCCTTCTCCA-----ATGGGTGTGGTACGCAGCCCCTTCGAGTACCCACAGTACTACCTGGCTGAGCCATG	1	1e-05	0
GAATGGCACAGAAGGCCCTAACTTCTACGTGCCCTTCTCCAAT--GATGGGTGTGGTACGCAGCCCCTTCGAGTACCCACAGTGCTACCTGGCTGAGCCATG	1	1e-05	0
GAATGGCACAGAAGGCCCTAACTTCTACGTGCCCTTCTCC----CGATGGGTGTGGTACGCAGCCCCTTCGAGTACCCACAGTACTACATGGCTGAGCCATG	1	1e-05	0
GAATGGCACAGAAGGCCCTAACTTCTACGTGCCCTTCTCCAATGCGACGGGTGTGGTACGCAGCCCCTTCGGGTACCCACAGTACTACCTGGCTGAGCCATG	1	1e-05	0
GAATGGCACAGAAGGCCCTAACTTCTACGTGCCCTTCTCCAATGCGATGGGTGTGGTACGCAGCCCCTTCGAGTACCCACAGTACTACCTGGCTGAGCCATG	1	1e-05	44GTCGCCCGGCCTCAGTGAGCGAGCGAGCGCGCAGAGAGGGAGTGGCCA
GAATGGCACAGAAGGCCTTAA-TTCCACCTGCCCCTCTCCAATGCGATGGGTGTGGTACCCAGCCCCTTCGAGTACCCACAGTACTACCTGGCTGAGCCATG	1	1e-05	0
GAATGGCACAGGAGGCCCTAACTTCTACGTGCCCTTCTCCAATGCGATGGGTGTGGTACGCGGCCCCTTCGAGTACCCACAGTACTACCTGGCTGAG-CATG	1	1e-05	0
GAATGGCACAGAAGGCCCTAACTTCTACGTGCCCTTCTCCAATGCGACGGGTGTGGTACGCAGCCCCTTCGAGTACCAACAGTACTACCTGGCTGAGCCATG	1	1e-05	0
GAATGGCACAGAAGGGCCTAACTTCTACGAGACCTTCTCCAATGCGACGGGTGTGGTACGCAGCCCCTTCGAGTACCCACAGTACTACCTGGCTGAGCCATG	1	1e-05	0
GAATGGCACAGAAGGCCCTAACTTCTACGTGCCCTTCTCCAA--CGATGGGTGTGGCACGCAGCCCCTTCGAGTACCCACAGTACTACCTGGCTGAGCCACG	1	1e-05	0
GAATGGCACAGAAGGCCCTAACTTCTACGTGCCCTTCTCC-----------------ACGCAGCCCCTTCGAGTACCCACAGTACTACCTGGCTGAGCCATG	1	1e-05	0
GAATGGCTCAGAAGGCCCTAACTTCTACGTGCCCTTCTCCAATGCGACGGGTGTGGTACGCAGCCCCTTCGAGTACCCACAGTACTACCTGGCTGAGCCATG	1	1e-05	0
GAATGGCACAGAAGGCCCTAACTTCTATGTGCCCTTCTCCAATGCGATGGGTGTGGTACGCAGCCCCTTCGAGTACCCACAGTACTACCTGGCTGAGCAATG	1	1e-05	0
GAATGGCACAGAAGGCCCTAACTTCTACGTGCCCTTCTCCAATGCGATGGGTGTGGTACGCAGCCCCTTCGAGTACCCACAGTACTACCTGGCTGAGCCATG	1	1e-05	43GA
GAATGGCACAGAAGGCCCTAACTTCTACGTGCCCTTCTCCAAT-CGATGGGTGTGGTACGCAGCCCCTTCGAGTACCAACAGTACTACCTGGCTGAGCCATG	1	1e-05	0
GAATGGCACAGAAGGCCCTAACTTCTACGTGCCCTTCTCCAAT-CGATGGGTGTGGTACGCAGCCCCTTCGAGTACCCACAGTACTACCTGGCTGTGCCATG	1	1e-05	0
GAATGGCACAGAAGGCCCTAACTTCTATGTGCCCTTCTCCAATGCGATGGGTGTGGTACGCAGCCCCTTCGAGTACCCACAGTACTACCTGGCTGAGCCATG	1	1e-05	44C
GAATGGCACAGAAGGCCCTAACTTCTACGTGCCCTTCTCCAATGCGATGGGTGTGGTACGCAGCCCCTTCGAGTACCCACAGTACTACCTGGCTGAGCCATG	1	1e-05	60CAGCCCCTTCGACCA
GAATGGCACAGAAGGACCTAACTTCTACGTGCCCTTCTCCAATGCGATGGGTGTGGTACGAAGCCCCTTCGAGTACCCACAGTACTACCTGGTTGAGCCATG	1	1e-05	0
GAATGGCACAGAAGGCCCTAACTTCTACGTGCCCTTCTCCAATGCGATGGGTGTGGTACGCAGCCCCTTCGAGTACCCACTGTACTACCTGGCTGAGCCATG	1	1e-05	47TGGGTGTG
GAATGGCACAGAAGGCCCTAACTTCTACGTGCCCTTCTCCAAT--GATGGGTGTGGTACGCCGCCCCTTCGAGTACCCACAGTACTACCTGGCTGAGCCATG	1	1e-05	0
GAATGGCACAGAAGGCCCTAACTTCTACGTGCCCTTCTCCAA--CGATGGGTGTGGTACGCAGCCCCTCCGAGTACCCACAGTACTACCTGGCTGAGCCATG	1	1e-05	0
GAATGGCACAGAAGGCGCTAACTTCTACGTGCCCTTCTCCAATGCGATGGGTGTGGTACGCGGCCCCTTCGAGTACCCACAGTACTACCTGGCTGAGCCATG	1	1e-05	0
GAATGGCACAGAAGGCCCTAACTTCTACGTGCCCTTCTCCAATGCGATGGGTGTGGTACGCAGCCCCTTCGAGTACCCACAGTACTACCTGGCTGAGCCATG	1	1e-05	34TCCTCCAAGGTCGCCCGACGCCCGGGCT64GCCCGGGCGGC78AGTGAGCGAGCGAGCGCG98GAGAGGG
GAATGGCACAGAAGGCCCTAACTTCTACGTGCCCTTCTCCAATGCGATGGGTGTGGTACGCAGCCCCTCCGAGTACCCACAGTATTACCTGGTTGAGCCGTG	1	1e-05	0
GAATGGCACAGAAGGCCCTAACTTCTACGTGCCCTTCTCCAATGCGATGGGTGTGGTACGCAGCCCCTTCGAGTACCCACAGTACTTCCTGGCTGAGCCATG	1	1e-05	43G
GAATGGCACGGAAGGCCCTAACTTCTACGTGCCCTTCTCCAAT-CGATGGGTGTGGTACGCAGCCCCTTCGAGTACCCACAGTACTACCTGGCTGAGCCATG	1	1e-05	0
GAATGGCACAGAAGGCCCTAACTTCTACGTGCCCTTCTCCAATGCGATGGGTGTGGTACGCAGCCCCTTCGAGTACCCACAGTACTACCTGGCTGAGCCATG	1	1e-05	44GCCACTCCCTCTCTGCGCGCTCGCTCGCTCACTGAGGCCGGGCGACCAAAGGTCGCCCGACGCCCGGGCTTTGCCCGGGCGGC
GAATGGCACAGAAGGCCCTAACTTCTACGTGCCCTTCTCCAATGCGATGGGAGTGGTACGCAGCCCCTTCGAGTACCCACAGTACTACCTGGCTTAGCCATG	1	1e-05	0
GAATGGCACAGAAGGCCCTAACTTCTACGTGCCC-----------------TGTGGTACGCAGCCCCTTCGAGTACCCACAGTACTACCTGGCTGAGCCATG	1	1e-05	0
GAATGGCACAGAAGGCCCCAACTTCTACGTGCCCTTCTCCAATG-GATGGGTGTGGTACGCAGCCCCTTCGAGTACCCACAGTACTACCTGGCTGAGCCATG	1	1e-05	0
GAATGGCACAGAAGGCCCTAACTTCTACGTGCCCTTCTCCAACGCGATGGGCGTGGTACGCAGCCCCTTCGAGTACCCACAGTACTACCTGGCTGAGCCATG	1	1e-05	0
GAATGGCACAGAAGGCCCTAACTTCTACGTGCCCTCCTCCAAGGCGATGGGTGTGGTACGCAGCCCCTTCGAGTACCCACAGTACTACCTGGCTGAGCCATG	1	1e-05	0
GAATGGCACAGAAGGCCCTAACTTCTACGTGCCCTTCTCC----CGATGGGAGTGGTACGCAGCCCCTTCGAGTACCCACAGTACTACCTGGCTGAGCCATG	1	1e-05	0
GAATGGCACAGAAGGCCCTAACTTCTACGTGCCCTTCTCTAATGCGATGGGTGTGGTACGCAGCCCCTTCGAGTACCCACGGTGCTACCTGGCTGAGCCATG	1	1e-05	0
GAACGGCACAG-AGGCCC-AA-TT-TATGTGCCCTTCTCCAA--CGA-GGGTGTGG---GC-GCCCCTTCGAG--CCCGCAGTACTACCCGGC-GA-CCATG	1	1e-05	14GC22TT44TCAC51C54G58C74AG94GA
GACTGGCACAGAAGGCCCTAACTTCTACGTGCCCTTCTCCA--GCGATGGGAGTGGTACGCAGCCCCTCCGAGTACCCACAGTACTACCTGGCTGAGCCATG	1	1e-05	0
GAATGGCACAGAAGGCCCTAACTTCTACGTGCCCTTCTCCAA--CGATAGGTGTGGTACGCAGCCCCTTCGAGCACCCGCAGTACTACCTGGCGGAGCCATG	1	1e-05	44TC
GAATGGCACAGAAGGCCCTAACTTCTACGTGCCCTTCTCCAATGCGATGGGTGTGGTACGCAGCCCCTTCGAGTACCCACAGTACTACCTGGCTGAGCCATG	1	1e-05	43GAGGTCGCCCGACGCCCGG
GAATGGCACAGAAGGCCCTAACCTCTACGTGCCCTTCTCCAATGCGATGGGTGTGGTACACAGCCCCTTCGAGTACCCACAGTACTACCTGGCTTAGCTATG	1	1e-05	0
GAATGGCAAAGAAGGCCCTAACTTCTACGTGCCCTTCTCCA---CGATGGGTGTGGTACGCAGCCCCTTCGAGTACCCACAGTACTACCTGGCTGAGCCATG	1	1e-05	0
GAATGGCACAGAAGGCCCTAACTTCTACGTGCCCTT-T----T--GATGGGTGTGGTACGCAGCCCCCTCGAGTACCCACAGTACTACCTGGCTGAGCCATG	1	1e-05	0
GAATGGCACAGAAGGCCCTAACTGCTACGTGCCCTTCTCCAATGCGATGGGTGTGGTACGCAGCCCCTTCGAGTACCCACAGTACTACCTGGCTGAGCCATG	1	1e-05	0
GAATGGCACAGAAGGCCCTAACTTCTACGTGCCCTTCTCCAATGCGATGGGTGTGGTACGCAGCCCCTTCGAGTACCCACAGTACTACCTGGCTGAGCCATG	1	1e-05	59GCAGCCCCTTCG
GAATGGCACAGAAGGCCCTAACTTCTACGTGCCCTTCTC------------------------CCCCTTCGAGTACCCACAGTACTACCTGGCTGAGCCATG	1	1e-05	0
GAATGGCACAGAAGGCCCTAACTTCTACGCGCCCTTCTCCAATTCGATGGGTGTGGTACGCAGCCCCTTCGAGTACCCACAGTACTACCTGGCTGAGCCATG	1	1e-05	0
GAATGGCACAGAAGGCCCCAA-TT-TATGTGCCCTTCTCCAA--CGA---GTGTGGT--GCAGCCCCTTCGAG--CCCGCAGTACTACCTGGC-GA-CCATG	1	1e-05	22TT44TCAC51C59GG74AG94GA
GAATGGCACAGAAGGCCCTAACTTCTACGTGCCCTTCTCCAATGC--------T-GTACGCAGCCCCTTCGAGTACCCACAGTACTACCTGGCTGAGCCATG	1	1e-05	0
GAATGGCACAGAAGGCCCTAACTTCTACGTGTCCTTCCCCAATGCGATGGGTGTGGTACGCAGCCCCTTCGAGTACCCACAGTACTACCTGGCTGAGCCATG	1	1e-05	43G
GAATGGCACAGAAGGCCCTAACTTCTACGTGCCCTTCTCCGATGCGATGGGCGTGGTACGCAGCCCCTTCGAGTACCCACAGTACTACCTGGCTGAGCCATG	1	1e-05	0
GAATGGCACAGAA-GCCCTAACTTCTACGTGCCCTTCTCCAATGCGATGGGTGTGGTACGCAGCCCCTTCGAGTACCCACAGTACTACCTGGCTGAGCCATG	1	1e-05	0
GAATGGCACAGAAGGCCCTAACTTCTACGTGCCCTTCTCCGATGCGATGGGTGCGGTACGCAGCCCCTTCGAGTACCCACAGTACTACCTGGCTGAGCCATG	1	1e-05	0
GAATGGCACAGAAGGCCCTAACTTCTACGTGCCCTTCTCCAATG-G-TGGGTGTGGTACGCAGCCCCTTCGAGTACCCACAGTACTACCTGGCTGAGCCATG	1	1e-05	0
GAACGGCACAGAAGGCCCTAACTTCTACGTGCCCTTCTCCAATGCGATGGGTGTGGTACGCAGCCCCTTCGAGTACCCACAGTACTCCCTGGCTGAGCCCTG	1	1e-05	0
GAATGGCACAGAATGCCCTAACTTCTACGTGCCCTTCTCCAATGCGATGGGTGTGGCACGCAGCCCCTTCGAGTACCCACAGTACTACCTGGCTGAGCCATG	1	1e-05	0
GAATGGCACAGAAGGCCCTAACTTCTATGTGCCCTTCTCCAATGCGATGGGTGTGATACGCAGCCCCTTCGAGTACCCACAGTACTACCTGGCTGAGCCATG	1	1e-05	0
GAATGGCACAGAAGGCCCTAACTTCTACGTGCCCTTCTCCAATGCGATGGGTGTGGTACGCAGCCCCTTCGAGTACCCACAGTACTACCTGGCTGAGCCATG	1	1e-05	41GGCGCCCGGCCTCAGTGAGCGAGCGAGCGCGCAGAGAGGG82G85GCCAA
GAATGGCACAGAAGGCCCTAACTTCTACGTGCCTTTCTCCAA--CGATGGGTGTGGTACGCAGCCCCTTCGAGTACCCACAGTACTACCTGGCTGAGCCATG	1	1e-05	0
GAATGGCACAGAAGGCCCTAACTTCTACGTGCCCTTCTCCAATGTGATGGGTGTGGT-CGCAGCCCCTTCGAG--CCCGCAGTACTACCTGGC-GA-CCATG	1	1e-05	43GA52A55TG58CCACTCCCTCTC72CGCGCTC80C85TCACTG93GCCGGGCGTGGTGCGGAC
GAATGGCACAGAAGGCCCTAACTTCTACGTGCCCTTCTCCAATGCGATGGGTGTGGTACGCAGCCCCTTCGATTACCCACAGTACTACCTGGCTGAGCCATG	1	1e-05	43G
GAATGGCACAGAAGGCCCTAACTTCTACGTGCCCTTCTCCAATGCGATGGGTGTGGTACGCAGCCCCTTCGAGTACCCACAGTACTACCTGGCTGAGCCATG	1	1e-05	42AGGTCGCCCGGCCTCAG61AGCGAGCGAGCGCGCAGAGA
GAATGGGACAGAAGGCTCTAACTTTTACGTGCCCTTCTACAATGCGATGGGTGTGGTACGCAGCCCCTTTGAGTACCCACAGTACTACCTGGCTGAGCCATG	1	1e-05	0
GAATGGCACAGAAGGCCCTAACTTCTACGTGCCCTTCTCCAATGCGATGGGTGTGGTACGCAGCCCCTTCGAGTACCCACAGTACTACCTGGCTGAGCCATG	1	1e-05	36TGGTCGCCCGGC51AGTGAGCGAGCGAGCGCG71GAGAGGG79G82GCCAAC
GAATGGCACAGAAGGCCCTAACTTCTACGTGCCCTTCTCCAATGCGACGGGTGTGGTACGCAGCCCCTTCGAATACCCACAGTACTACCTGGCTGAGCCATG	1	1e-05	0
GAATGGCACAGAAGGCCCTAACTTCTACGTGCCCTTCTCCAATGCGATGGGTGTGGTACGCAGCCCCTTCTAGTCCCCACAGTACTACCTGGCTGAGCCATG	1	1e-05	0
GAATGGCACAGAAGGCCCTAACTTCTACGTGCCCTTCTCCAATGCGATGGGTGTGGTACGCAGCCCCTTCGAGTACCCACAGTACTACCTGGCT--GCCATG	1	1e-05	93TT
GAATGGCACAGAAGGCCCTAACTTCTACGCGCCCTTCTCCAATGCGACGGGTGTGGTACGCAGCCCCTTCGAGTACCCACAGTACTACCTGGCTGAGCCATG	1	1e-05	0
GAATGGTACAGAAGGCCCTAACTTCTACGTGCCCTTCTCCAATGCGATGGGTGTGGTACGCAGTCCCTTCGAGTACCCACAGTACTACCTGGCTGAGCCATG	1	1e-05	0
GAATGGCACAGAAGGCCCTAACTTCTACGTGCCCTTCTCCAA--CGATGGGTGTGGTAAGCAGCTCCTTCGAGTACCCACAGTACTACCTGGCTGAGCCATG	1	1e-05	0
GAATGGCACAGAAGGCCCTAACTTCTACGGGCCCTTCCCCAATGCGATGGGTGTGGTACGCAGCCCCTTCGAGTACCCACAGTACTACCTGGCTGAGCCATG	1	1e-05	0
GAATGGCACAGAAGGCCCTAACTTCTACGTGCCCTTCTCCAATGCGATGGGTGTGGTACGCAGCCCCTTCGAGTACCCACAGTACTACCTGGCTGAGCCATG	1	1e-05	44GTGGTCGCCCGGCCTCAGTGAGCGAGCGAGCGCGCAGAGAGGGAGTGGCCAA
GAATGGCACAGAAGGCCCTAACTTCTACGTGCCCTTCTCCAATGCGATGGGTGTGGTACGCAGCCCCTTCGAGTACCCACAGTACTACCTGGCTGATCCATG	1	1e-05	43G
GAATGGCACAGAAGGCCGTAACTTCTACGTGTCCTTCTCCAATGCGATGGGCGTGGTACGCAGCCCCTTCGAGTACCCACAGTACTACCTGGCTGAGCCATG	1	1e-05	0
GAATGGCACAGAAGACCCTAACTTCTACGTGCCCTTCTCCAATGCGATGGGTGTGGTACGCAGCCCCTTCGAGTACCCACAGTACTACCTGGCTGAGTCATG	1	1e-05	0
GAATGGCACAGAAGGCCCTAATTTCTACGTGCCCTTCTCCAATGCGACGGGTGTGGTACGCAGCCCCTTCGAGTACCCACAGTACTACCTGGCTGAGCCATG	1	1e-05	0
GAATGGCACAGAAGGTCCTAACTTCTACGTGCCCTTCTCCAATGTGACGGGTGTGGTACGCAGCCCCTTCGAGTACCTACAGTATTACTTGGCTGAGCCATG	1	1e-05	0
GAATGGCACAGAAGGCCCAAACTTCTACGTGCCCTTCTCCAAT--GATGGGTGTGGTACGCAGCCCCTTCGAGTACCCACAGTACTACCTGGCTGAGCCATG	1	1e-05	0
GAATGGCACAGAAGGCCCTAACTTCTACGTGCCCTTCTCCAATGCGATGGGTGT-GTACGCAGCCCCTTCGAGTACCCACAGTACTACCTGGCTGAGCCATG	1	1e-05	53C
GAATGGCACAGAAGGCCCTAACTTCTACGTGCCCTTCTCCAATGCGATGGGTGTGGTACGCAGCCCCTTCGAGTACCCACAGTACTACTTGGCTGAGCCATG	1	1e-05	43CGCCCGGCCTCAGTGAGCGAGCGAGCGCGCAGA77A
GAATGGCACAGAAGGCCCTAACTTCTACGTGCCCTTCTCCAATGCGATGGGTGTGGTACGCAGCCCCTTCGAGTACCCACAGTACTACCTGGCTGAGCCATG	1	1e-05	41TTTGCCCGGGCGGCCTCAGTGAGCGAGCGAGCGCGCAGAGAGGGAGTGGCCAACTCC100CACTAGG
GAATGGCACAGAAGGCCCTAACTTCTACGTGCCCTTCTCCAAT--------------------------------CCCACAGTACTACCTGGCTGAGCCATG	1	1e-05	0
GAATGGCACAGAAGACCCTAACTTCTACGTGCCCTTCTCCAAT-CGATGGGTGTGGTACGCAGCCCCTTCGAGTACCCACAGTACTACCTGGCTGAGCCATG	1	1e-05	0
GAATGGCACAGAAGGCCCTAACTTCTACGTGCCCTTCTCCAATGAGACGGGTGTGGTACGCAGCCCCTTCGAGTACCCACAGTACTACCTGGCTGAGCCATG	1	1e-05	0
GAATGGCACAGAAGGCCCTAACTTCTA-----------------CGATGGGTGTGGTACACAGCCCCTTCGAGTACCCACAGTACTACCTGGCTGAGCCATG	1	1e-05	0
GAATGGCACAGAAGGCCCTAACTTCTACGTGCCCTTCTCCAAT-CGATGGGTGTGGTACGCAACCCCTTCGAGTACCCACAGTACTACCTGGCTGAGCCATG	1	1e-05	0
GAATGGCCCAGAAGGCCTTAACTT-TACGTGCCCTTCTCCAAT-CGATGGGTGTGGTACGCAGCCCCTTCGAGTACCCACAGAACTACCTGGCTGAGCCATG	1	1e-05	23C
GAATGGCACAGAAGGCCCTAACTTCTACGTGCCCTTATCCAATGCGATGGGTGTGGTACGCAGCCCCTTCGAGAACCCGCAGTACTACCTGGCTGAGCCATG	1	1e-05	0
GAATGGCACAGAAGGCCCTAACTTCTACGTGCCATTCTCCA---CGATGGGTGTGGTACGCAGCCCCTTCGAGTACCCACAGTACTACCTGGCTGAGCCATG	1	1e-05	0
GAACGGCACAG-AGGCCC-AA-TT-TATGTGCCCTTCTCCAA--CGA--GGCGTGGT--GCAGCCCCTTCGAG--CCCGCAGTACTACGTGGC-GA-CCATG	1	1e-05	14GC22TT44TCAC59GG74AG94GA
GAATGGCACAGAAGGCCCTAACTTCTACGTGCCCCTCTCCAATGCGATGGGTGTGGAACGCAGCCCCTTCGAGTACCCACAGTACTACCTGGCTGAGCCATG	1	1e-05	0
GAATGGCACAGAAGGCCCTAACTTCTACGTGCCCTTCTCCAA--CGATGGGTGTGGTACGCAGCCCCTTCGAGTACCCACAGTACAACCTGGCTGAGCCATG	1	1e-05	0
GAATGGCACAAAAGGCCCTAACTTCTACGTGCTCTTCTCCAATGCGATGGGTGTGGTACGCAGCCCCTTCGAGTACTCACAGTACTATCTGGCTGAGCCATG	1	1e-05	0
GATTGGCACAGAAGGCCCTAACTTCTACGTGCCCTTCCCCAATGCGATGGGTGTGGTACGCAGCCCCTTCGAGTACCTACAGTACTACCTGGCTGAGCCATG	1	1e-05	0
GACTGGCACAGCAGGCCCTAACTTCTACGTGCCCTTCTCCAATGCGATGGGTGTGGTACGCAGCCCCTTCGAGTACCCACAGTACTACCTGGCTGAGCCATG	1	1e-05	0
GAATGGCACAGAAGGCCCTGACTTCTACGTGCTCTTCTCCAATGCGATGGGTGTGGTACGCAGCCCCTTCGAGTACCCACAGTACTACCTGGCTGAGCCATG	1	1e-05	0
GAATGGCACAGAAGGCCCTAACTTCTACGTGCCCTTCTCCAATGCGATGGGTGTGGTACGCAGCCCCTTCGAGTACCCACAGTACTACCTG--TGAGCCATG	1	1e-05	92CC
GAATGGCACAGAAGGCCCTAACTTCTACGTGCCCTTCTCCAAT--GAGGGGTGTGTTACGCAGCCCCTTCGAGTACCCACAGTACTACCTGGCTGAGCCATG	1	1e-05	0
GAATGGCACAGAAGGCCCTAACTTCTACGTGCCCTTCTCCAATGCGACGGGTGTGGTACGCAGCCCCTTCGAGTACCCACTGTACTACCTGGCTGAGCCATG	1	1e-05	0
GAATGGCACAG-AGGCCCTAACTTCTACGTGCCCTTCTCCAATGCGATGGGTGTGGTACGCAGCCCCTTCGAGTACCCACAGTACTACCTGGCTGAGCCATG	1	1e-05	9A
GAATGGCACAGACGGCCCTAACTTCTACGTGCCCTTCTCCAAT--GATGGGTGTGGTACGCAGCCCCTTCGAGTACCCACAGTACTACCTGGCTGAGCCATG	1	1e-05	0
GAATGGCACAGAAGGCCCTAACTTCTACGTGCCCTTCTCCAATGCGATGGGTGTGGTACGCAGCCCCT--GAGTACCCACAGTACTACCTGGCTGAGCCATG	1	1e-05	67G70G
GAATGGCACAGAAGGCCCTAACTTCTACGTGCCCTTCTCCAATGCGATGGGTGTGGGACGCAGCCCCTTCGAGTACCCACAGTACTACCTGACTGAGCCATG	1	1e-05	0
GAATGGCACAGAAGGCCCTAACTTCTACGTGCCCTTCTCCAATGCGATGGGTGTGGTACGCAGCCCCTTCGAGTACCCTCAGTACTACCTGGCTGAGCCATG	1	1e-05	0
GAATGGCACAGAAGGCCCTAACTTCTACGTGCCCTTCTCCAATGCGATGGGTGTGGTACGCAGCCCCTTCGAGTACCCACAGTACTACATGGCTGGGCTATG	1	1e-05	0
GAATGGCACAGAAGGCCCTAACTTCTACGTGCCCTTCTCCAATGCGATGGGTGTGGTACGCAGCCCCTTCGAGTACCCACAGTACTAGCTGGCTGAGCCATG	1	1e-05	0
GAATGGCACAGAAGGCCTTAACTTCTACGTGCCCTTCTCCAATGCGATGGGTGTGGTACGCAGCCCCTTCGAGTACCCACAGTACTACCTGGCTGAGCCATG	1	1e-05	44A
GAATGGCACAGAAGGCCCTAACTTCTACGTGCCCTTCTCCAATGCGATGGGTGTGGTACGCAGCCCCTTCGAGTACACACAGTACTACCTGGCTGAGCCACG	1	1e-05	0
GAATGGCACAGAAGGCCCTAACTTCTACGTGCCCTTCTCCAATGCGATGGGTGTGGTACGCAGCCCCTTCAAGTATCCACAGTACTACCTGGCTGAGCCATG	1	1e-05	0
GAATGGCACAGAAGGCCCTAACTTCTACGTGCCCTTCTCCAATGCGATGGGTGTGGTACGCAGCCCCTTCGAGTACCCACAGTACTACCTGGCTGAGCCATG	1	1e-05	42AGG46CGCCCGACGCCCGG61CTTT
GAATGGCACAGAAGGCCCTAACTTCTACGTGCCCTTCTCCAATGC-A--GGCGTGGT--GCAGCCCCTTCGAG--CCCGCAGTACTACCTGGC-GA-CCATG	1	1e-05	44TCA59GG74AG94GA
GAATGACACAGAAGGCCCTAACTTCTACGTGCCCTTCTCCA---CGATGGGTGTGGTACGCAGCCCCTTCGAGTACCCACAGTACTACCTGGCTGAGCCATG	1	1e-05	0
GAATGGCACAGAAGGCCCTAACTTCTACGTGCCCTTCTCCAAT-CGATGGGTGTGGTACGCAGCCCCTTCGAGTACCCACAGTACTACCTGGCTGAGCAATG	1	1e-05	0
#NAME?	1	1e-05	0
GAATGGCACAGAAGGCCCTAACTTCTACGTGCCCTTCTCCAAT--GATGGGTGTGGTACGCAGCCCCTTCGAGTACCCACAGTATTACCTGGCTGAGCCATG	1	1e-05	0
GAATGGCACATAAGGCCATAACTTCTACGTGCCTTTCTCCAATGCAATGGGTGTGGTACGCAG--CCTTCGAGTATCCACAGTACTACCTGGCTGAGCCATG	1	1e-05	64A68C
GAACGGCACAG-AGGCCC-AA-TT-TATGTGCCCTTCTCCAATGCG-TG---GTG---CGGAGCCCCTTCGAG--CCCGCAGTACTACCTGGC-GA-CCATG	1	1e-05	14GC22TT42CT45CACAG74AG94GA
GAACGGCACAG-AGGCCC-AA-TT-TATGTGCCCTTCTCCAA--CGA--GGCGTGGT--GCAGCCCCTTCGAG--CCCGCAGTACTACCTGGC-GA-CCATG	1	1e-05	14GC22TT44TCAC59GG74AG94CA
GAATGGCACAGAAGGCCCTAACTTCTACGTGCCCTTCTCCAA--CGATGGGTGTGGTACG-AGCCCCTTCGAGTACCCACAGTACTACCTGGCTGAGCCATG	1	1e-05	59G
GAATGGCACAGAAGGCCCTAAATTCTACGTGCCCGTCTCCAATGCGATGGGTGTGGTACGCAGCCCCTTCGAGTACCCACAGTACTACCTGGCTGAGCCATG	1	1e-05	0
GAATGGCACAGAAGGCCCTAACTTCTACGTGCCCTTCTCCAATGCGATGGGTGTGGTACGCAGCCCCTTCGAGTACCCACAGTACTACCTGGCTGAGCCATG	1	1e-05	42TGGGGCGGCCTCAGTGAGCGAGCGAGCGCGCAGAGAGGGAG
GAACGGCACAG-AGGCCC-AA-TT-TATGTGCCCTTCTCCAA--CGA--GGCGTGGT--GCAGCCCCTTCGAGGACCC--AGTACTACCTGGC-GA-CCATG	1	1e-05	14GC22TT44TCAC59GG75G78G94GA
GAATGGCACAGAAGGCCCTAACTTCTACGTGCCCTTCTCCAATGCGATGGGTGTGGTACGCAGCCCCTTCGAGTACCTACAGTACTACCTGGCTGAGCCATG	1	1e-05	43G
GAATGGCACAGAAAGCCCTAAATTCTACGTGCCCTTCCCCAATGCGATGGGTGTGGTACGCAGCCCCTTCGAGTACCCACAGTACTACCTGGCTGAGCCATG	1	1e-05	0
GAATGGCACAGAAGGCCCTAACTTCTACGTGCCCTTCTCCAAT--GATGGGTGTGGTACGCACCCCCTTCGAGTACCAACAGTACTACCTGGCTGAGCCATG	1	1e-05	0
GAATGGCACAGAAGGCCATAACTTCTACGTGCCCTTCTCCAATGC------------ACCCAGCCCCTTCGAGTACCCACAGTACTACCTGGCTGAGCCATG	1	1e-05	0
GAATGGCACAGAAGGCCCTAACTTCTACGTGCCCTTCTCCAATG-GGTGGGTGTGGTACGCAGCCCCTTCGAGTACCCACAGTACTACCTGGCTGAGCCATG	1	1e-05	0
GAATGGCACAGAAGGCCCCAACTTCTACGTGCCCTTCTCCAATGCGATGGGTGTGGTACGCAGCCCCTTCGAGTACCCACAATACTACCTGGCTGAGCCATG	1	1e-05	0
GAATGGCACAGAAGGCCCT-ACTTCTACGTGCCCTTC-CCAA-GCGATGGGTGTGGTACGCAGCCCCTTCGAGTACCCACAGTACTACCCGGCTGAGCCATG	1	1e-05	38CA
GAATGGCACAGAAGGCCCTAACTTCTACGTGCCCTTCTCCAATG-GATGGGTGTGGTACGCAGCCCCTTCGAGTACCCACAGTACTACCTGTCTGAGCCATG	1	1e-05	0
GAATGGCACAGAAGGCCCTAACTTCTACGTGCCCTTCTCCAATGCGATGGGTGTGGTACGCAGCCCCTTCGAGTACCCACAGTACTACCT-GCTGAGCCATG	1	1e-05	0
GAATGGCACAGAAGGCCCCAACTTCTACGTGCCCTTCTCCAATGCGATGGGTGTGGTACGCACCCCCTTCGAGTACCCACAGTACTACCTGGCTGAGCCATG	1	1e-05	0
GAATGGCACAGAAGGCCCTAACTTCTACGTGCCCTTCTCCAAT------GGTGTGGTACGCAGCCCCTTCGAGTACCAACAGTACTACCTGGCTGAGCCATG	1	1e-05	0
GAACGGCACAG-AGGCCC-AA-TT-TATGTGCCCTTCTCCAA--CGA--GGCGTGGTACGGAGCCCCTTCGAGCACCCACAGTACTACCTGGCTGAGCCATG	1	1e-05	14GC22TT44TCAC
GAATGGCACAGAAGGCCCTAACTTCTACGTACCCTTCT------CGATGGGTGTGGTACGCAGCCCCTTCGAGTACCCACAGTACTACCTGGCTGAGCCATG	1	1e-05	0
GAATGGCACAGAAGGCCCTAACTTCTACGTGCCCTTCTCCAATGCGATGGGTGTGGTACGCAGCCCCTTCGAGTACCCACAGTACTACCTGGCTGAGCCATG	1	1e-05	42TGTGCCCCTCGAGTCTAGAGGCCGCAGGAACCCCTAGTGATGGAGTTGGCCACTCCCTCTCTGCGCGCTCGCTCGCTCACTGAGGCCGGGCGACCTT
AAATGG-A-AGAAGGCCCTAACTTCTACGTGCCCTTC------GC------------AC----CCCCTTCGAGTACCAACAGTACTACCTGGCTGAGCAATG	1	1e-05	8AA
GAATGGCACAGAAGGCCCTAACTTCTACGTGCCCTTCTCCAATGC--TGGGTGTGGTACGCAGCCCCTTCGAGTACCCACAGTACTACCTGGCTGAGCCATG	1	1e-05	0
GAATGGCACAGAAGGCCCTAACTTCTACGTGCCCTTCTCCAATGCGATGGGTGCGGTACGCAGCCCCTTCGAGTACCCACAGTACTACCTGGCTGAGCCATG	1	1e-05	44T
GAACGGCACAG-AGGCCC-AA-TT-TATGTGCCCTTCTCCAA--CGA--GGCGTGGT--GCAGCCCCTTTGAG--CCCGCAGTACTACCTGGC-GA-CCATG	1	1e-05	14GC22TT44TCAC59GG74AG94GA
GACTGGCACAGAAGGCCCTAACTTCTACGTGCCCTTCTCCAATGCGATGGGTGTGGTACGCAGCCCCTTCGAGTACCCACAGTACTACCTGGCTGCGCCATG	1	1e-05	43G
GAATGGCACAGAAGGCCCTAACTTCTACATGCCCTTCTCCAATGCGATGGCTGTGGTACGCAGCCCCTTCGAGTACCCACAGTACTACCTGGCTGAGCCATG	1	1e-05	0
GAACGGCACAG-AGGCCC-AA-TT-TATGTGCCCTTCTCCAA--CGA--GGCGTGGT--GCAGCCCCTTCGAG----CACAGTACTACCTGGC-GA-CCATG	1	1e-05	14GC22TT44TCAC59GG75GTCG94GA
GAATGGCACAGAAGGCCCTAACTTCTACGTGCCCTCCTCCAAT-CGATGGGTGTGGTACGCAGCCCCTTCGAGTACCCACAGTACTACCTGGCTGAGCCATG	1	1e-05	0
GAATGGCACAGAAGGCCCTAACTTCTACGTGCCCTTCTCCAATGCGATGGGCGTGGTACGCAGCCCCTTCGAGTACCCACAGTACTACCAGGCTGGGCCATG	1	1e-05	43G
GAATGGCACAGAAGGCCCTAACTTCTACGTGCCCTTCTCCAATG-GATGGGTGTGGTACGCAGCCCCTTCGAGTACCCAAAGTACTACCTGGCTGAGCCATG	1	1e-05	0
GAATGGCACAGAAGGCCCTAACTTCTACGTGTCCTTCTCCAATGCGATGGGTGTGGTACGCAGCCCCTTCGAGTACCCATAGTACTACCTGGCTGAGCCTTG	1	1e-05	0
GAATGGCACAGAAGGCTCTAACTTCTACGTGCCCTTCTCCAATGCGATGGGTGTGGTACGCAGCCCCTTCGAGTACCCACAGTACTACCTGGCTGAGCCATG	1	1e-05	43G
GAATGGCACAGAAGGCCCTAACTTCTACGAGCCCGTCTCCAATGCGATGGGTGTGGTACGCAGCCCCTTCGAGTACCCACAGTACTACCTGGCTGAGCCATG	1	1e-05	0
GAACGGCACAG--GGCCCCAA-TT-TATGTGCCCTTCTCCAA--CGA--GGCGTGGT--GCAGCCCCTTCGAG--CCCGCAGTACTACCTGGC-GA-CCATG	1	1e-05	9AT22TT44TCAC59GG74AG94GA
GAATGTCACAGAAGGCCCTAACTTCTACGCGCCCTTCTCCAATGTGATGGGTGTGGTACGCAGCCCCTTCGAGTACCCACAGTACTACCTGGCTGAGCCATG	1	1e-05	0
GAATGGCACAGAAGGCCCTAACTTCTACGCGCCCTTCTCCAATGCGATGGGTGTGGTACGCAGCCCCTTCGAGTACCCACAGTACTACCTGGCTGAGCCATG	1	1e-05	43G
GAATGGCACAGAAGGCCCTAACTTCTACGTGCCCTTCTCCA---CGATGGGTGTGGTACGCAGCCCCTTCGAGTACCCACAGTACTACCTGACTGAGCCATG	1	1e-05	0
GAATGGCACAGAAGGCCCTAACTTCTACGTGCCCTTCTCCAAT-CGATGGGTGTGGTACACAGCCCCTTCGAGTATCCACAGTACTACCTGGCTGAGCCATG	1	1e-05	0
GAATGTCACAGAAGGCCCTAACTTCTACGTGCCCTTCTCCAAT--GATGGGTGTGGTACGCAGCCCCTTCGAGTACCCACAGTACTACCTGGCTGAGCCATG	1	1e-05	0
GAATGGCACAGAAGGCCCTAACTTCTACGTGCCC-TC-CCAATGCGATGGGTGTGGCACGCAGCCCCTACGAGTACCCACAGTACTACCTGGCTGAGCCATG	1	1e-05	37A39A
GAATGGCACAGAAGGCCCTAACTTCTACGTGCCCTTCTCCGATGCGATGGGTGTGGTACGCAGCCCCTTCGAGTACCCACAGTACTACCTGGCTGAGCCATG	1	1e-05	44C
GAATGGCACAGAAGGCCCTAACTTCTACGTGCCCTTCTCCAATGCGATGGGTGTGGTACGCAGCCCCTTCGAGTACCCACGGTACTCCCTGGCTGAGCCATG	1	1e-05	0
GAATGGCACAGAAGGCCCTAACTTCTACGTGCCCTTCTCCAATGCGATGGGTGTGGTACGCAGCCCCTTCGAGTACCCACAGTACTACCTGGCTGAGCCATG	1	1e-05	44TGGCCACTCCCTCTCTGCGCGCTCGCTCGCTCACTGAGGCCGGGCGAAC
GAATGGCACAGAAGGCCCTCACTTCTACGTGCCCTTCTCCAATG-GATGGGGGTGGTACGCAGCCCCTTCGAGTACCCACAGTACTACCTGTCTGAGCCATG	1	1e-05	0
GAATGGCACAGAAGGCCCTAACTTCTACGTGCCCTTCTCCAATG---TGGGTGTGGTATGCAGCCCCTTCGAGTACCCACAGTACTACCTGGCTGAGCCATG	1	1e-05	0
GAATGGCACAGAACGCCCTAACTTCTACGTGCCCTTCTCCAATGCGATGGGTGTGGTACGCAGCCCCTTCGAGTACCCACAGTACTACCTGGCTGAGCCATG	1	1e-05	0
GAATGGCACAGAAGGCCCTAACTTCTACGTGCCCTTCTCCAATGCGATGGGTGTGGTACGCAGCACCTTCGAGTACCCACAGTACTACCAGGCTGAGCCATG	1	1e-05	0
GAATGGCACAGAAGGCCCTAACTTCTACGTGCCCTTCTCCAATTCGATGGGTGTGGTACGCAGCCCCTTCGAGTACCCACAGTAATACCTGGCTGAGTCAAG	1	1e-05	0
GAATGGTACAGAAGGCCCTAACTGCTACGTGCCCTTCTCCAATGCGATGGGTGTGGTACGCAGCCCCTTCGAGTACCCACAGTACTACCTGGCTGAGCCATG	1	1e-05	0
GAATGGCACAGAAGGCCCTAAATTCTACGTGCCCTTCTCCAATGCGATGGGTGTGGTACGCAGCCCATTCGAGTACCCACAGTACTACCTGGCTGAGCCATG	1	1e-05	0
GAATGGCACAGAAGGCCCTAACTTCTACGTGCCCTTCT-CAA-GCGATGGGTGTGGTACGCAGCCCCTTCGAGTACCCACAGTACTACCTGGCTGAGCCATG	1	1e-05	36GCGGC45GTGAGCG
GAATAGCACAGAAGGCCCTAACTTCTACGTGCCCTTCTCCAATGCGACGGGTGTGGTACGCAGCCCCTTCGAGTACCCACAGTACTACCTGGCTGAGCCATG	1	1e-05	0
#NAME?	1	1e-05	0
GCATGGCACAGAAGGCCCTAACTTCTACGTGCCCTTCTCCAATGCGATGGGTGTGGTACGCAGCCCCTTCGAGTACCCACAGTCCTACCTGGCTGAGCCATG	1	1e-05	0
GAATAGCACAGAAGGGCCTAACTTCTACGTGCCCTTC-CCCATGCGACGGGTGTGGTACGCAGCCCCTTC-AGTACCCACAGTACTACCTGGCTGAGCCATG	1	1e-05	30A66T
GAATGGCACAGAAGGCCCTAACTTCTACGTGCCCTTCTCCAATGCGATGGGTATGGTACGCAGCCCCTTCGAGTACCCACAGTACTACCTGGCTGAGCCATG	1	1e-05	43G
GAATGGCACAGAAGGCCCTAACTTCTACGTGCCCTTCTCTAATG---TGGGTGTGGTACGCAGCCCCTTCGAGTACCCACAGTACTACCTGGCTGAGCCATG	1	1e-05	0
GAACGGCACAG-AGGCCC-AA-TT-TATGTGCCCTTCTCCAA--CGA--GGCGTGGT--GCAGCCCCTTCGAG--CCCGCAGTACTACCTGGCGGAGCCATG	1	1e-05	14GC22GT44TCAC59GG74AG
GAATGGCACAGAATGCCCTAACTACTACGTGCCCTTCTCCAATCCGATGGGTGTGCTACGCAGCCCCTCCGAGTACCCACAGTACTACCTGGCTGAGCCATG	1	1e-05	0
GAAAGGCACAGACGGCCCTAACTTCTACGTGCCCTTCTCCAATGCGATGGGTGTGGTACGCAGCCCCTTCGAGTATCCACAGTACTACCTGGCTGAGCCATG	1	1e-05	0
GAATGGCACAGAAGGCCCTAACTTCTACGTGCCCTTCTCCAATGCGATGGGCGCGGTACGCAGCCCCTTCGCGTACCCACAGTACTACCTGGCTGAGCCATG	1	1e-05	44A
GAATGGCACAGAAGG-CCTAACTTCTACGTGCCCTTCTCCAAT------GGTGTGGTACGCAGCCCCTTCGAGTACCCACAGTACTACCTGGCTGAGCCATG	1	1e-05	0
GAATGGCACAGAAGGCCCTAACTTCTATGTGCCCTTCTCCAATGCGATGGGCGTGGTACGCAGCCCCTTCGAGCACCCACAGTACTACCTGGCTGAGCCATG	1	1e-05	0
GAATGGCACAGAAGGCCCTAACTTCTACGCGCCCTTCTCCAATGCGATGGGTGTGGTACGCAGCCCATTCGAGTACCCACAGTACTACCTGGCTGAGCCATG	1	1e-05	0
GAATGACACAGAAGGCCCTAACTTCTACGTGCCCTTCTCCAA--CGATGGGTGTGGTACGCAGCCCCTTCGAGTACCCACAGTACTACCTGGCTGAGCCATG	1	1e-05	0
GAATGGCACAGAAGGCCCTAACTTCTACGTGCCC-TCTCCAATGTGATGGGTGTGGTACGCAGCCCCTTCGAGTACCCACAGTACTACCTGGCTGAGCCATG	1	1e-05	0
GAATGTCACAGAAGGCCCTAACTTCTACGTGCCCTTCTCCAATGCGATGGGTGTGGTACACAGCCCCTTCGAGTACCCACAGTACTACCTGGCTGAGCCATG	1	1e-05	0
GAATGGCACAGAAGGCCCTAACTTCTACGTGCCCTTCTCCAAT-CGATGGGTGTGGTACGCAGCCCCTTCGAGTACCCACAGTACCACCTGGCTGATCCATG	1	1e-05	0
GAACGGCACAG-AGGCCC-AA-TTCT--GTGCCCTTCTCCAA--CGA--GGCGTGGT--GCAGCCCCTTCGAG--CCCGCAGTACTACCTGGC-GA-CCATG	1	1e-05	14GC22TT26A44TCAC59GG74AG94GA
GAATGGCACAGTAGGCCCTAACTTCTACGTGCCCTTCTCCAAT-CGATGGGTGTGGTACGCAGCCCCTTCGAGTACCCACAGTACTACCTGGCTGAGCCATG	1	1e-05	0
GAATGGCACAGAAGGCCCTAACTTCTACGTGCCCTTCTCCAATGCGACGGGTATGGTACGCAGCCCCTTCGAGTACCCACAGTACTACCTGGCTGATCCATG	1	1e-05	0
GAATGGCACAGAAGGCACTAACTTCTACGTGCCCATCTCCAATGCGATGGGTGTGGTACGCAGCCCCTTCGAGTACCCACAGTACTACCTGGCTGAGCCATG	1	1e-05	0
GAATGGCACAGAAGGCCCTAACTTCTACGTGCCCTTCTCCAATGCGATGGGTGTGGTACGCAGCCCCTTCGAGTACCCAGAGTACTACCTGGCTGAGCCTTG	1	1e-05	0
GAACGGCACAG-AGGCCC-AA-TT-TATGTGCCCTTCTCCAA--CGA--GGCGTGGT--GCAGCCCCTTCGA----CCACAGTACTACCTGGCTGAGCCATG	1	1e-05	14GC22TT44TCAC59GG75GCCG
GAATGGCACAGAAGGCCCTAACTTCTACGTGCCCTTCTCCAATGCGATGGGTGTGGTACGCAGCCCCTTCGAGTACCCACAGTACTACCTGGCTGAGCCATG	1	1e-05	44GGCCACTCCCTCTCTGCGTGCTCGCTCGCTCACTGTGGCCGGGCGAA92AA
GAATGGCACAGACGGCCCTAACTTCTACGTGCCCTTCTCCAA--CGATGGGTGTGGTACGCAGCCCCTTCGAGTACCCACAGTACTACCTGGCTGAGCCATG	1	1e-05	0
GAATGGCACAGAAGGGCCTAACTTCTACGTGCCCTTCTCCAATGC-ATGGGTGTGGTACGCAGCCCCTTCGAGTACCCACAGTACTACCTGGCTGAGCCATG	1	1e-05	0
GAACGGCACAGAAGGCCCTAACTTCTACGTGCCCTTCTCCAACGCGTTGGGTGTGGTACGCAGCCCCTTCGAGTACCCACAGTACTACCTGGCTGAGCCATG	1	1e-05	0
GAATGGCACAGAAGGCCCTAACTTCTACGTGCCCTTCTCCAATGAGATGGGTGTGGTACGCAGCCCCTTCGAGTACCCACAGTACTACCTGGCTGAGCCATG	1	1e-05	41ATGAG
GAATGGCACAGAAGGCCCTAACTTCTACGTGCCCTTCTCCAATGCGATGGGTGTGGTACGCAGCCCCTTCGAGTACCCACAGTACTACCTGGCTGAGCCATG	1	1e-05	44TGGTCGCCCGGCCTCAGTGAGCGAGCGAGCGCGCAGAGAGGGAGTGGCCA
GAATGGCACAGAAGGCCCTAACTTCTACGTGCCCTTCTCCAA--CGATGGGTGTGGTACGCAGCCCCTTCGAGTACCCACAGTACTACCTGGCTGATCCATG	1	1e-05	0
GAATGGCACAGAAGGCCCTAACTTCTACGTGCCCTTCTCCAATG-GATGGGTGTGGTACGCAGCCCCGTCGAGTACCCACAGTACTACCTGGCTGAGCCATG	1	1e-05	0
GAATGGCACAGAAGGCCCTAACTTCTACGTGCCCTTCTCCAATGCGACGGGTGTGGTACGCAGCCCCTTCTAGTACCCACAGTACTACCTGGCTGAGCCATG	1	1e-05	0
GAATGGCACAGAAGGCCCTAACTCCTACGTGCCCTTCTCAAATGCGATGGGTGTGGTACGCAGCCCCTTCGAGTACCCACAGTACTACCTGGCTGAGCCATG	1	1e-05	0
GAATGGCACAGAAGGCCCTAACTTCTACGTGCCCTTCTCCAAT-------GTGTGGTACGCAGCCCCTTCGAGCACCCACAGTACTACCTGGCTGAGCCATG	1	1e-05	0
GAATGGCACAGAAGGCCCTAACTTCTACGTGCCCTTCTCCAATG-----------------------TTCGAGTACCCACAGTACTACCTGGCTGAGCCATG	1	1e-05	0
GAACGGCACAG-AGGCCC-AA-TT-TATGTGCCCTTCTCCAA--CGA--GGCGTGGT--GCAGCCCCTTCGAG--CCCGCAGTACTACCTGGCCGAACCATG	1	1e-05	14GC22TT44TCAC59GG74AG
GAATGGCACAGAAGGCCCTAACTTCTACGTGCCCTTCTCCAATGCGATGGGTGTGGTACGCAGCCCCTTCGAGTACCCACAGTACTACCTGGCTGAGCCATG	1	1e-05	43GCCG
GAATGGCACAGAAGGCCCTAACTTCTACGTGCCCTTCTCCAAT-CGATGGGTGTGGTACGCAGCCCCATAGAGTACCCACAGTACTACCTGGCTGAGCCATG	1	1e-05	0
GAATGGCACAGAAGGCCCTAA-----------------------CGATGGGTGTGGTACGCAGCCCCTTCGAGTACCCACAGTACTACCTGGCTGAGCCATG	1	1e-05	0
GAATGGCACAGAAGGCCCTAACTTCTACGTGCCCTTCTCCAATG-GATGGGTGTGGTACGCAGCCCCTTCGAGTACCCACAGTACTACCTGGCTGAGCCATG	1	1e-05	45TG
GAACGGCACAG-AGGCCC-AATTTCTACGTGCCCTTCTCCAA--CGA--GGCGTGGT--GCAGCCCCTTCGAG--CCCGCAGTACTACCTGGC-GA-CCATG	1	1e-05	14GC44CCAC59GG74AG94GA
GAATGGCACAGAAGGCCCTAACTTCTACGTGCCCTTCACCAATGC---GGGTGTGGTACGCAGCCCCTTCGAGTACCCACAGTACTACCTGGCTGAGCCATG	1	1e-05	0
GAATGGCACAGAAGGCCCTAACTTCTACGTGCCATTCTCCAAT-CGATGGGTGTGGTACGCAGCCCCTTCGAGTACCCACAGTACTACCTGGCTGAGCCATG	1	1e-05	0
GAACGGCACAG-AGGCCC-AA-TT-TATGTGCCCTTCTCCAA--CGA-GGGTG-GG---GCAGCCCCTTCGA-T-CCCGCAGTACTACCTGGC-GA-CCATG	1	1e-05	14GC22TT44TCAC51C59GG74AG94GA
GAATGGCACAGAAGGCCCTAACTTCT-------------------GATGGGTGTGGTACGCAGCCCCTTCGAGTACCCACAGTACTACCTGGCTGAGCCATG	1	1e-05	0
GAATGGCACAGAAGGCCCTAACTTCTACGTGCCCTTCTCCAATGCGATGGGTGTGGTACGCAGCCCCTTCGAGTACCCACAGTACTACCTAGCTGAGCCATG	1	1e-05	43G
GGATGGCACAGAAGGCCCTAACTTCTACGTGCCCTTCTCC----CGATGGGTGTGGTACGCAGCCCCTTCGAGTACCCACAGTACTACCTGGCTGAGCCATG	1	1e-05	0
GAATGGCAAAGAAGGCCCTAACTTCTACGTGCCCTTCTCCAATGCGACGGGTGTGGTACGCAGCCCCTTCGAGTACCCACAGTACTACCTGGCTGAGCCATG	1	1e-05	0
GAATGGCACAGAAGGCCCGAACTTCTACGTGCCCTTCTCCAATGCGACGGGTGTGGTACGCAGCCCCTTCGAGTACCCACAGTACTACCTGGCTGAGCCATG	1	1e-05	0
GAATGGCACAGAGGGCCCTAACTTCTACGTGCCCTTCTCCAATG-GATGGGTGTGGTACGCAGCCCCTTCGAGTACCCACAGTACTACCTGGCTGAGCCATG	1	1e-05	0
GAATGGCACAGAAGGCCCTAACTTCTACGTGCCCTTCTCTAATG-GATGGGTGTGGTACGCAGCCCCTTCGAGTACCCACAGTACTACCTGGCTGAGCCATG	1	1e-05	0
GAATGGCACAGAAGGCCCTCACTTCTACGTGCCCTTCTCCAATGCGATGGGTGTGGTACGCAGCCCCTTCGAGTACCCACAGTACTACCTGGCTGGGCCATG	1	1e-05	0
GAATGGCACAGAAGGCCCTAACTTCTACGTGCCCTTCTCCAATGCGATGGGTGTGGTATGCAGCCCCTTCGAGTACCCACAGTACTACCCGGCTGAGCCATG	1	1e-05	0
GAATGGCACAGAAGGCCCTAACTTCTTCGTGCCCTTCTCCAATG-GATGGGTGTGGTACGCAGCCCCTTCGAGTACCCACAGTACTACCTGGCTGAGCCATG	1	1e-05	0
GAATGGCACAGAAGGCCCTAACTTCTACGTGCCCTTCTCCAATGCGATGGGTGTGGTACGCAGCCCCTTCGAGTACCCACAGTTCTACCTGGCTGAGCCATG	1	1e-05	43G
GAATGGCACAGAAGGCCCTAACTTCTACGTGCCCTTTTCCAATG-GATGGGTGTGGTACGCAGCCCCTTCGAGTACCCACAGTACTACCTGGCTGAGCCATG	1	1e-05	0
GAATGGCACAGAAGGCCCTAACTTCTACGTGCCCTTCTCCAATGCGATGGGTGTGGTACGCAGCCCCTTCGAGTACCCACAGTACTACCTGGCTGAGCCATG	1	1e-05	43CCCGGCCTCAGTGAGCGAGCGAGCGCGCAGAGAGGGAGTG84AC
GAATGGCACAGAAGGCCCTAACTTCTACGTGCCCTTCTCC-ATG-GA----TGTGGTACGCAGCCCCTTCGAGTACCCACAGTACTACCTGGCTGAGCCATG	1	1e-05	0
GAACGGCACAG-AGGCCC-AA-TT-TATGTGCCCTTCTCCAA--CGA--GGCGTGGT--GCAGCCCCTTCGAG--CCCGCAGTACTACCTGGC-GA-CCATG	1	1e-05	14GC22TT44TCAC59GG74AG94TA
GAATGGCACAGAAAGCCCTAACTTCTACGTGCCCTTCTCCAATGCGACGGGTGTGGTACGCAGCCCCTTCGAGTACCCACAGTACTACCTGGCTGAGCCATG	1	1e-05	0
GAATGGCACAGAAGGCCCTAACTGCTACGTGCCCTTCTTCAATGCGATGGGTGTGGTACGCAGCCCCTTCGAGTACCCACAGTACTACCTGGATGAGCCATG	1	1e-05	0
AAATGGCACAGAAGGCCCTAACTTCTACGTGCCCTTCTCCAAT--GATGGGTGTGGTACGCAGCCCCTTCGAGTACCCACAGTACTACCTGGCTGAGCCATG	1	1e-05	0
GACTGGCACAGAAGGCCCTAACTTCTACGTGCCCTTCCCCAATGCGATGGGTGTGGTACGCAGCCCCTTCGAGTACCCACAGTACTACCTGGCTGAGCCATG	1	1e-05	0
GAATGGCACAGAAGGCCCTAACTTCTACGTGCCCTTCTCCAATGCGATGGGTGTGGTACGCAGCCCCTTCGAGTATCCACAGTACTACCTGGTTTAGCCATG	1	1e-05	0
GAATGGCGCAGAAGGCCCTAACTTCTACGTGCCCTTCTCCAATGCGATGGGTGTGGTACGCAGCCCCTTCGAGTACCCACAGTACTACCTGGCTGAGCCATG	1	1e-05	43G
GAATGGCACAGAAGGCCCTAACTTCTACGTGCCCTTCTCCAATGCGATGGG--TGGTACGCAGCCCCTTCGAGTACCCACAGGACCACCTGGCTGAGCCATG	1	1e-05	50C
GAATGGCACAGAAGGCCCTAACTTCTACATGCCCTTCTCCAATGCGATGGGTGTGATACGCAGCCCCTTCGAGTGCCCACAGTACTACCTGGCTGAGCCATG	1	1e-05	0
GAATGGCACAGAAGGCACTAACTTCTACGTGCCCTTCTCCAAT-CGATGGGTGTGGTACGCAGCCCCTTCGAGTACCCACAGTACTACCTGGCTGAGCCATG	1	1e-05	0
GAATCGCACAGAAGGCCCTAACTTCTACGTGCCCTTCTCCAATGCGATGGGTGTGGTACGCAGCCCCTTCGAGTACCCGCAGTACTACCTGGCTGAGCCATG	1	1e-05	0
GAATGGCACAGAAGGCCCTAACTTCTACGTGCCCTTCTCC----------GTGTGGTACGCAGCCCCTTCGAGTACCCACAGTACTACCTGGCTGAGCCATG	1	1e-05	0
GAATGGCACAGAAGGCCCTAACTTCTACGTGCCCTTCTCCAATGCGATGGGTGTGGTACGCAGCCCCTTCGAGTACCCACAGTACTACCTGGCTGAGCCATG	1	1e-05	43CGGGCGTCGG57CCTT64TCGCCCGGCCTCAGTGAGCGAGCGAGCGCGCAGAGAGGGA
GAATTGCACAGAAGGCCCTAACTTCTACGTGCCCTTTTCCATTGCGATGGGTGTGGTACCCAGCCCCTCCGAGTACCCACAGTACTACCTGGCTGAGCCATG	1	1e-05	0
GAATGGCACAGAAGGCCCTAACTTCTACGTGCCCTTCTCCAATGCGATGGGGGTGGTACGCAGCCCCTTCGAGTACCCACAGTACTACCTGGCTGAGCCGTG	1	1e-05	0
GAACGGCACAG-AGGCCC-AA-TT-TATGTGCCCTTCTCCAA--CGA--GGCGTGGT--GCAGCCCCTTCGAG----CACAGTACTACCTTGCTGAACCATG	1	1e-05	14GC22TT44TCAC59GG75GC78GT
GAATGGCACAGAAGGCCCTAACTTCTACGTGCCCTTCTCCAA--CGATGGGCGTGGTACGCAGCCCCTTCGAGCACCCGCAGTACTACCTGGCTGAACCATG	1	1e-05	44CC
GAATGGCACAGAAGGCCCTAACTTCTACGTGCCCTTCTCCAATGCGATGGGTGTGGTACGCAGCCCCTTCGAGTACCCACAGTACTACCTAGCTGAGCCATG	1	1e-05	44A
GAATGGCACAGAAGGCCCTAACTTCTACGTGCGCTTCTCCAATGCGATGGGTGTGGTACGCAGCCCCTTCGAGTACCCACAGTACTACCTGGCTGAGCCATG	1	1e-05	44A
GAATGGCACAGAAGGCCCTGACTTCTACGTGCCCTTCTCCAATGCGATGGGTGGGGTACGCAGCCCCTTCGAGTACCCACAGTACTACCTGGCTGAGCCATG	1	1e-05	0
GAATGGCACAGAAGGCCCTAACTTCTACGTGCCCTTCTCCAAT-CGATGGGTGTGGTACGCAGCCCCTTCGAGTACCCACAGTACTACCTGGCTGGGCCATG	1	1e-05	0
GAATGGCACAG-AGGCCC-AATTTCTATGTGCCCTTCTCCAA--CGA--GGCGTGGT--GCAGCCCCTTCGAG--CCCGCAGTACTACCTGGC-GA-CCATG	1	1e-05	14GC44TCAC59GG74AG94GA
GAATGGCACAGAAGGCCCTAACTTCTACGTGGCCGTCTCCAATGCGATGGGTGTGGTACGCAGCCCCTTCGAGTACCCACAGTACTACCTGGCTGAGCCATG	1	1e-05	0
GAATGGCACAGAAGGCCCTAACTTCTACGTGCCCTTCTCCAATGC--------TGGTACGCAGCCCCTTCGAGTACCCACAGTACTACCTGGCTGAGCCATG	1	1e-05	0
GAATGGCACAGAAGGCCCTAACTTCTACGTGCCCTTCTCCAATGCGATGGGTGTGGTACGCAGCCCCTTCGAGTACCCACAGTACTACCTGGCTGAGCCATG	1	1e-05	43CGCCCGGCCTCAGTGAGCGAGCGAGCGCGCAGAGAGG81A
GAATGGCACAGAAGGCTCTAACTTCTACGCGCCCTTCTCCAATGCGATGGGTGTGGTACGCAGCCCCTTCGAGTACCCACAGTACTACCTGGCTGAGCCATG	1	1e-05	0
GAATGGCACAGAAGGCCCTAACTTCTACGTGCCCTTCTCCAATGCGATTGGTGTGGTACGCAGCCCCTTCGAGTACCCACAGTACTACCTTGCTGAGCCATG	1	1e-05	0
GAA---CACAG-AGGCCC-AA-TT-TATGTGCCCTTCTCCAA--CGA--GGCGTGGT--GCAGCCCCTTCGAG--CCCGCAGTACTACCTGGC-GA-CCATG	1	1e-05	4C12GC20TT42TCAC57GG72AG92GA
GAATGGCACAGAAGGCCCTAACTTCTACGTGCCCTTCTCCAA--CGATGGGTGTGGTACGCAGCCCCTTCGTGTACCCACAGTACTACCTGGCTGAGCCATG	1	1e-05	0
GAATGGCACAGAAGGCCCTAACTTCTATGTGCCCTTCTCCAATGCG--GGGTGTGGTACGCAGCCCCTTCGAGTACCCACAGTACTACCTGGCTGAGCCATG	1	1e-05	47CG
GAATGGCACAGAGGGCCCTAACTTCTACGTGCCCTTCTCCAATGCGACGGGTGTGGTACGCAGCCCCTTCGAGTACCCACAGTACTACCTGGCTGAGCCATG	1	1e-05	0
GAATGGAACAGAAGGCCCTAACTTCTACGTGCCCTTCTCCACTGCGATGGGTGTGGTACGCAGCCCCTTCGAGTACCCACAGTACTATCTGGCTGAGCCATG	1	1e-05	0
GCATGGCACAGAAGGCCCTAACTTCTACGTGCCTTTCTCCAATGCGATGGGTGTGGTACGCAGCCCCTTCGAGTACCCACAGTACTACCTGGCTGAGCCATG	1	1e-05	0
GAATGGCACAGAAGGCCCTAACTTATACGTGCCCTTCTCCAATGCGATGGGAGTGGTACGCAGCCCCTTCGAGTACCCACAGTACTACCTGGCTGAGCCATG	1	1e-05	0
GAATGGCACAGAAGGCCCTAACTTCTACGTGCCCTTCTCCAAT--GATGGGTGTGGTACGCAGCCCCTTCGAGTACCCACAGTACTAACTGGCTGAGCCATG	1	1e-05	0
GAATGGCACAGAAGGCCCTAACTTCTACGTGCCCTTCTCCAATG-GATGGGTGTGGTACGCCGCCCCTTCGAGTACCCACAGTACTACCTGGCTGAGCCATG	1	1e-05	0
GAATGGCACAGAAGGCCCTAACTTCTACGTGCCCTTCTCCAAT--GATGGGTGTGGTACGCAGCCCATTCGAGTACCCACAGTACTACCTGGCTGAGCCATG	1	1e-05	0
GAATGGCACAGAAGGCCCTAACTTCTACGTGCCCTTCTCCAATGCGATGGGTGTGGTACGCAGCCCCATCGAGTACCCACAGTACTACCTGGCTG-GCCATG	1	1e-05	94A
GAACGGCACAGAAGGCCCTAACTTCTACGTGCCCTTCTCCAATG-GATGGGTGTGGTACGCAGCCCCTTCGAGTACCCACAGTACTACCTGGCTGAGCCATG	1	1e-05	0
GAATGGCACAGAAGGCCCTAACTTCTACGTGCCCTTCTCCAATGCGATGGGTGTGGTACGCAGCCCCTTCGAGTACCCACAGTACTACCTGGCTGAGCCATG	1	1e-05	43GTGGCCACTCCCTCTCTGCGCGCTCGCTCGCTCACTGAGGCCGCCCGGGCAAA
GAACGGCACAG-AGGCCC-AA-TT-TATGTGCCCTTCTCCAA--CGATGG---TGGT--GCAGCCCCTTCGAG--CCCGCAGTACTACCTGGC-GA-CCATT	1	1e-05	14GC22TT44TCAC51C59GG74AG94GA
GAATGGCACAGGAGGCCCTAACTTCTACGTGCCCTTCTCCAA--CGATGGGTGTGGTACGCAGCCCCTTCGAGTACCCACAGTACTACCTGGCTGAGCCATG	1	1e-05	0
GAATGGCACAGAAGGCCCTAACTTCTACGTGCCCTTCTCCAATGCGATGGGTGTGGTACGCAGCCCCTTCGAGTACCCACAGTACTACCTGGCTGAGCCATG	1	1e-05	42TGTGGCCACTCCCTCTCTGCGCGCTCGCTCGCTCACTG
GAATGGCACAGAAGGCCCTAACTTCTACGTGCCCTTCTCCAAT-CGATGGGTGTGGTACGCAGCCCCTTCGAGTACCCTCAGTACTACCTGGCTGAGCCATG	1	1e-05	0
GAACGGCACAGAGGGCCCTAACTTCTACGTGCCCTTCTCCAATGCGATGGGTGTGGTACGCAGCCCCTTCGAGTACCCACAGTACTACCTGGCTGAGCCATG	1	1e-05	44C
GAATGGCACAGAAGGCCCT-ACTTCTACGTGCCCTTCTCCAATGCGATGGGTGTGGTACGCAGCCCCTTCGAGTACCCACAGTACTACCTGGCTGAGCCATG	1	1e-05	15C
GACTGGCACAGAAGGCCCTAACTTCTACGTGCCCTTCTCCAATGCGATGGGTGTGGTACGCAGCCCCTTCGAGTACCCACAGTACTACCTGGCTGCGCCATG	1	1e-05	0
GAATGGCACAGAAGGCCCTAACTTCTACGTGCCCTTCTACAATGCGATGGGTGTGGTACGCAGCCCCTCCGAGTACCCACAGTACTACCTGGCTGAGCCATG	1	1e-05	0
GAATGGCACAGAAGGCCCTAACTTCTACGTGCCCTTCTCCAATG-GATGGGTGTGGTACGCAGCCCCTTCGAGTACCCACAGTACCACCTGGCTGAGCCATG	1	1e-05	45AG
GAATGGCACAGAAGGCCCTAACTTCTACGTGCCCTTCTCCAATGCGATGGGTGTGGTACGCACCCCCTTCGAGTACCCACAGTACTACCTGGCTGAGCCATG	1	1e-05	44C
GAATGGCACAGAAGGCCCTAACTTCTACGTGCCCTTCTCCAA--CGATGGGTGTGGTACGCAG-CCCTTCGAGTACCCACAGTACTACCTGGCTGAGCCATG	1	1e-05	0
GAATGGCACAGAAGGCCCTAACTTCTACGTGCCCTTCTCCAATGCGATGGGAGTGGTACGCAGCCCCTTCGAGTACCCACAGCACTACCTGGCTGAGCCATG	1	1e-05	0
GAATGGCACAAAAGGCCCTAACTTCTACGTGCCCTTCTCCAA--CGATGGGTGTGGTACGCAGCCCCTTCGAGTACCCACAGTACTACCTGGCTGAGCCATG	1	1e-05	0
GAATGGCACACAAG--CCTAACTTCTACGTGTCCTTCTCCAAT-CGATGGGTGTGGTACGCAGCCTCTTCGAGTACCCACAGTACTACCTGGCTGAGCCATG	1	1e-05	13C16T
GAATGGCACAGAAGGCCCTAACTTCTACGTGCCCTTCTCCAA--CGATGGGTGTGGTACGCAGCCCCTTCGAGTACCCACAGTACTGCCTGGCTGAGCCATG	1	1e-05	0
GAATGGCACAGAAGGCCCTAACTTCTATGTGCCCTTCTCCAAT------GGTGTGGTACGCAGCCCCTTCGAGTACCCACAGTACTACCTGGCTGAGCCATG	1	1e-05	0
GAATGGCACAGAAGGCCCTAACTTCTACGGGCCCTTCTCCAATCCGATGGGTGTGGTACGCAGCCCCTTCGAGTACCCACAGTACTCCCTGGCTGAGCCATG	1	1e-05	0
GAATGGCACAGAAGGCCCTAACTTCTACGTGCCCTTCT-CAAAGCGATGGGTGTGGTACGCAGCCCCTTCGAGTACCCACAGTACTACCTGGCTGAGCCATG	1	1e-05	0
GAATGGCACAGAAGGCCCTAACTTCTACGTGCCCTTCTCCAATGCGATGGGTGTGGTACGCAGCCCCTTCGAGTACCCACAGTACTACCTGGCTGAGCCATG	1	1e-05	44TTGGCCACTCCCTCTCTGCGCGCTCGCTCGCTCACTGAGGCCGCCC
GAATGGTACAGAAGGCCCTAACTTCTACGTGCCCTTCTCCAATGCGATGGGTGTGGTACGCAGCCCCTTCGAGTACCCACAGTACTACCTGACTGAGCCATG	1	1e-05	0
GAATGGCACAGAAGGCCCTAACTTCTACGTGCCCCTCTCCAATGCGATGGGTGTGGTACGCAGCCCCTTCGAGTACCCACAGTACTACCTGGCTGAGCCATT	1	1e-05	0
GAATGGCACAGATGGCCCTAACTTCTACGTGCCCTTCTCCAAT-CGATGGGTGTGGTACGCAGCCCCTTCGAGTACCCACAGTACTACCTGGCTGAGCCATG	1	1e-05	0
GAATGGCACAGAAGGCCCTAACTTCTACGTGCCCTTCTCCAATGCGATGGGTATGGTACGCAGCCCCTTCGAGTACCCACAGTACTACCTGGCTGAGCAATG	1	1e-05	0
GAATGGCACAGAAGGCCCTAACTTCTACGTGCCCTTCTCCAATGCGATGGGTGTGGTACGAAGCCCCTTCGAGTACCCACAGTACTACCTGGCTGAGCCATG	1	1e-05	43G
GAATGGCACAGAAGGCCCTAACTTCTACGTGCCCTTCTCCAATGCGATGGGTGTGGTACGCAGCCCCTTCGAGTACCCACAGTACTACCGGGCTGAGCCATT	1	1e-05	0
GAATGGCACAGAAGGCCCTAACTTCTACGTGCCCTTCTCCAATGCGCTGGGTGTGGTACGCAGCCCCTTCGAGTACCCACAGTACTACCCGGCTGAGCCATG	1	1e-05	0
GAATGGCACAGAAGGCCCTAACTTCTACGTGCCCTTCTCCAATGCGATGGGTGTGGTACGCAGCCCCTTCGAGTGCCCACAGTACTACCTGGCTGGGCCATG	1	1e-05	0
GAATGGCACAGAAGGCCCTAACTTCTACGTGCCCTTCTCCAATGCGATGGGTGTGGAACGCAGCCCCTTCGAGTACCCACAGTACTACCTGGCTGAGCCATG	1	1e-05	44GCTTTGGTCGACCGGCCTCAGCGCGCGAGCGAGCGCGCA
GAATGGCACAGAAGGCCCTAACTTCTACGTGCCCTTCTCCACTGCGATGGGTGTGGTACGCAGCCCCTTCGAGTACCCACAGTCCTACCTGGCTGAGCCATG	1	1e-05	0
GAATGGCACAGAAGGCCCTCACTTCTACGTGCCCGTCTCCAATGCGATGGGTGTGGTACGCAGCCCCTTCGAGTACCCACAGTACTACCTGCCTGAGCCATG	1	1e-05	0
GAATGGCACAGAAGGCCCTAACTTCTACGTGCCCTTCTCCAAT-CGATGGGTGTGGGACGCAACCCCTTCGAGTACCCACAGTACTACCTGGCTGAGCCATG	1	1e-05	0
GAATGGCACAGAAGGCCCTAACTTCTACGTGCCCTTCTCCA-----ATGGGTGTGGTACGCAGCCCCTTCGAGTACCCACAGTACCACCTGGCTGAGCCATG	1	1e-05	0
GAATGGCACAGCAGG--CTAACATCTACGTGCCCTTATCCAAT-CCATGGGTGTGGTACGCAGCCCCTTCGAGTACCCACAGTACTACCTGGCTGAGCCATG	1	1e-05	16GT40A
GAATGGCACAGAAGGCCCTAACTTCTACGTGCCTTTCTCCAATGCGATGGGTTTGGTACGCAGCCCCTTCGAGTACCCACAGTACTACCTGGTTGAGTCATG	1	1e-05	0
GAATGGCACAGAAGGCCCTAACTTCTACGTGCCCTTCTCCAATGCGATGGGTGTGGTACACAGCCCCTTCGAGTACCCACAGTACTACCTGGCTGAGCCATG	1	1e-05	43GG
GAATGGCACAGAAGGCCCTAACTTCTACGTGCCCTTCTCCAATGCGATGGGAGTGGTACGCAGCCCCTTCGAGTACCCACAGTACTATCTGGCTGAGCCATG	1	1e-05	0
GAATGGCACAGAAGGCCCGAACTTCTACGTGCCCTTCTCCAATGCGATGGGTGTGGTACGCAGCCCCTTCGAGTACCCACAGTACTACCTGGCTGAGCCATG	1	1e-05	0
GAATGGCACAGAAGGTCCTAACTTCTACGTGCCCTTCTCCAATGCGATGGGTGTGGTACGCAGCCCCTTCGAGTACCCACAGTACTACCTGGCTGAGCCATG	1	1e-05	43G
GAATGGCACAGAAGGCCCTAACTTCTACGTGCCCTTCTCCAATGCGTTGGGTGTGGTACGCAGCCCCTTCGAGTACCCACAGTACTCCCTGGCTAACCCATG	1	1e-05	0
GAATGGCACAGAAGGCCCTAACTTCTACGTGCCCTTCCCCAATGCGATGGGTGTGGTACGCAGCCCCTTCGAGTACCCACAGTACTACCTGGCTGAGCCATG	1	1e-05	44C
GAATGGCACAGAAGGCCCTAACTTCTACGTGCCCTTCCCCAATGCGATGGGTGTGGTACGCAGCCCCTTCGAGTACCCACAGTACTACCTGGCTGAGCCATG	1	1e-05	44A
GAATGGCACAGAAGGCCCTAACTTCTACGTGCCCCTCTCCAAT--GATGGGTGTGGTACGCAGCCCCTTCGAGTACCCACAGTACTACCTGGCTGAGCCATG	1	1e-05	0
TAATGGCACAGAAGGCCCTAACTTCTACGTGCCCTTCTCCAATG---TGGGTGTGGTACGCAGCCCCTTCGAGTACCCACAGTACTACCTGGCTGAGCCATG	1	1e-05	0
GAATGGCACATAAGGCCCTAACTTCTACGTGCCCTTCTCCAAT-CGATGGGTGTGGTACGCAGCCCCTTCGAGTACCCACAGTACTACCTGGCTGAGCCATG	1	1e-05	0
GAACGGCACAGAAGGCCCCAACTTCTACGTGCCCTTCTCCAACGCGA--GGCGTGGTACGGAGCCCCTTCGAGCACCCGCAGTACTACCTGGCTGAACCATG	1	1e-05	46AC
GAATGGCTCAGAAGGCCCTAACTTCTACGTGCCCTTCTCCAAT--GATGGGTGTGGTACGCAGCCCCTTCGAGTACCCACAGTACTACCTGGCTGAGCCATG	1	1e-05	0
GAATGGCACAGAAGGCCCTAACTTCTACGTGCCCTTCTCCAAT--GATGGGTGTGGTACGCAGCCCCTTCGAATACCCACAGTACTACCTGGCTGAGCCATG	1	1e-05	0
GAATGGCACAGAAGGCCCTAACTTCTACGTGCCCTTCTCCAATGCGATGGGTGTGGTACACAGCACCTTCGAGTACCCACAGTACTACCTGGCTGAGCCATG	1	1e-05	0
GAATGGCACAGAAGGCCCTCACCTCTACGTGCCCTTCTCCAATGCGATGGGTGTGGTACGCAGCCCCTTCGAGTACCCACAGTACTACCTGGCTGAGCCATG	1	1e-05	0
GAATGGCACAGAAGGCCCTAACTTCTACGTGCCCTTCTCCAATGCGACGGGTGTGGTACGCATCCCCTTCGAGTACCCACAGTACTACCTGGCTGAGCCATG	1	1e-05	0
GAATGGCACAGAAGGCCCTAACTTCTACGTGCCCTTCTCCAATGCGATGGGTGTGGTACGCAGCCCCTTCGAGTACCCACAGTACTACCTGGCTGAGCCATG	1	1e-05	44TTTGGTCGCCCGGCCTCACTGAGCGAGCGAGCTCGCAGAGAGGGAGTGGCC
G--TGGCACAGAAGGCCCTAACTTCCACGTGCCCTTCTCCAATGCGATGGGTGTGGTACGCAGCCCCTTCGAGAACCCACAGTACTA--TGGCTG-GC-ATG	1	1e-05	2CT86AA96GT
GAATGGCACAGAAGGCCCTAACTTCTACGTGCCCTTCTCCAATGC--TGGATGTGGTACGCAGCCCCTTCGAGTACCCACAGTACTACCTGGCTGAGCCATG	1	1e-05	46AC
GAATGGCACAGAAGGCCCTAACTTCTACGTGCCCT------------------TGGTACGCAGCCCCTTCGAGTACCCACAGTACTACCTGGCTGGGCCATG	1	1e-05	0
GAATGGCACAGAAGGCCCTAACTTCTACGTGCCCTTCTCCAATGCGACGGGTGTGGTACGCAGCCCCTTCGAGTACCCACAGTACTACCTGGCTAAGCCATG	1	1e-05	0
GAATGGCACAGAAGGCCCTAACTTCTACGTGCCCTTCTCCAATGCGATGGGTGTGGTACGCAGCCCCTTCGAGTACCCACAGTACTACCTGGCTGAGCCATG	1	1e-05	42CGACGCCCGGGCTTTGCCCGGGCGGCCTCAG75AGCGAGCGAGCGCGC
GAATGGCACAGAAGGCCCTAACTTCTACGTGCCCTTCTCCAA--CGATGGGTGTGGTACGCAGCCCCTTCGAGTACCAACAGTACTACCTGGCTGAGCCATG	1	1e-05	0
GAACGGCACAGAAGGCGCTAACTTCTACGTGCCCTTCTCCAACGCGATGGGTGTGGGACGCAGCCCCTTCGAGTACCCACAGTACTACCTGGCTGAGCCATG	1	1e-05	0
GAACGGCACAG-AGGCCC-AA-TT-TATGTGCCCTTCTCCAATGCGATGGGTGTGGTACGCTGCCCCTTCGAGTACCCACAGTACTACCTGGCTGAGCCATG	1	1e-05	14GC22TT
GAATGACACAGAAGGCCCTAACTTCTACGTGCCCTTCTCCAATGCGATGGGTGTGGTACGCAGCCCCTTCGAGTACCCACAGTACTACCTGGCTGAGCCATG	1	1e-05	43G
GAATGGCACAGAAGGCCCTAACTTCTACGTGCCCTTCTCCAATGCGATGGGTGTGGTACGCAGCCCCTTCGAGTACCCACAGTACTACCTGGCTGAGCCATG	1	1e-05	43GAAAGGTCGCCCGGCCTCAGTGAGCGAGCGAGCGCGCAGAGAGGGAGTGGCCAACTCCATCACTAGGGGTTCCTGCGGCCTCTAGACTCGAGGG
GAATGGCACAGAAGGCCCTAACTTCTACGTGCCCTTCTCCAA-GCGATGGGTGTGGTACGCAGCCCCTTCGAGTACCCACAGTACTACCTGGCTGAGCCATG	1	1e-05	43GG
GAATCGCACAGCAGGCCCTAACTTCTACGCGCCCTTCTCCAATGCGATGGGTGTGGTACGCAGCCCCTTCGAGTACCCACAGTACTACCTGGCTGAGCCATG	1	1e-05	0
GAATGGCACAGAAGGCCCTAACTTCTACGTGCCCTTCTCCAATG-GATGGGTGTGGTACGCAGCCCCTTCGAGTACCCACAGTACTACCTGGCTGAGCTATG	1	1e-05	0
GAATGGCACAGAAGGCCCTAACTTCTACGTGCCCTTCTCCA---CGATGGGTGTGGTACGCAGCCCCTTCGAGTACCCACAGTACTACCTGGCTGAGCCATG	1	1e-05	38CC
GAACGGCACAG-AGGCCC-AA-TT-TATGTGCCCTTCTCCAA--CGA--GGCGTGGT--GCAGCCCCTTCGAG--CCCGCAGTACTACCTGGC-GA-CCATG	1	1e-05	14GC22TT44CCAC59GG74AG94GA
GAACGGCACAG-AGGCCC-AA-TT-TATGTGCCCTTCTCCAA--CGA---GTGTGGT--GCAGCCCCTTCGAG--CCCGCAGTACTACCTGGC-GA-CCATG	1	1e-05	14GC22TT44TCAC51C59GG74AG94GA
GAATGGCACAGAAGGCCCTAACTTCTACGTGCCCTTCTCCAATGCGGTGGGTGTGGTACGCAGCCCCTTCGAATACCCACAGTACTACCTGGCTGAGCCATG	1	1e-05	0
GAATGGCACAGAAGGCCCTAACTTCTACGTGCCCTTCTCCAATG-GATGGGTGTGGTACGCAGCCCCTTCGAGTACCCACAGTACGACCTGGCTGAGCCATG	1	1e-05	0
GAATGGCACAGAAGGCCCTAACTTCTACGTGCCCTTCTCCAAT-CGATGGGT---GTACGCAGCCCCTTCGAGTACCCACAGTACTACCTGGCTGAGCCATG	1	1e-05	0
GAATGGCACAGAAGGCCCTAACTTCTACGTGCCCTTCTCCAA--CG--GGGTGTGGTACGCAGCCCCTTCGAGTACCCACAGTACTACCTGGCTGAGCCATG	1	1e-05	43GG
GAATGGCACAGAAGGCCCTAACTTCTACGTGCCCTTCTCCAATGCGACGGGT-TGGTACGCAGCCCCTTCGAGTACCCACAGTACTACCTGGCTGAGCCATG	1	1e-05	51C
GAATGGCACAGAAGGCCCTAACTTCTACGTGCCCTTCTCCAATGCGATGGGTGTGGTACGCAGCCCCTTCGAGTACCCACAGTACTACCTGGCTGAGCCATG	1	1e-05	49GGTGT
GAATGGCACAGAAGGCCCTAACTTCTACGTGCCCTTCTCCAATG---TGGGTGTGGTACGCAGCCCCTTCGAGTACCCACAGTACTACCTGGCTGAGCCATG	1	1e-05	45T
GAATGGCACAGAAGGCCCTAACTTCTACGTGCTCTTCTCCAAT-CGATGGGTGTGGTACGCAGCCCCTTCGAGTACCCACAGTACTACCTGGCTGAGCCATG	1	1e-05	0
GAATGGCACAGAAGGCCCTAACTTCTACGTGCCCTTCT-CAATGCGACGGGTGTGGTACGCAGCCCCTTCGAGTACCCACAGTACTACCTGGCTGAGCCATG	1	1e-05	0
#NAME?	1	1e-05	0
GAATGGCACAGAAGGCCCTAACTTCTACGTGCCCTTCTCCAATGCGATGGGTGTGGTACGCATCCCCTTCGAGTACCCACAGTACTACCTGGATGAGTCATG	1	1e-05	0
GAATGGCACTGAAGGCCCTAACTTCTACGTGTCCTTCTCCAATGCGATGGGTGTGGTACGCAGCCCCTTCGAGTACCCACAGTACTACCTGGCTGAGCCATG	1	1e-05	0
GAATGGCACAGAAGGCCCTAACTTCTACGTGCCCTTCTCCAAT-CGATGGGTGTGGTATGCAGCCCCTTCGAGTACCCACAGTACTACCTGGCTGAGCCATG	1	1e-05	0
GAACGGCACAG-AGGCCC-AA-TT-TATGTGCCCTTCTCCAATGC---GGGTGTGGTACGCAGCCCCTTCGAGCACCCACAGTACTACCTGGCTGAGCCATG	1	1e-05	14GC22TT42CG46A
GAAT-GCACAG-AGGCCC-AA-TT-TATGTGCCCTTCTCCAA--CGA--GGCGTGGT--GCAGCCCCTTCGAG--CCCGCAGTACTACCTGGC-GA-CCATG	1	1e-05	3C14GC22TT44TCAC59GG74AG94GA
GAATGGCACAGAAGGCCCTAACTTCTACGTGCCCTTCTCTAATGCGACGGGTGTGGTACGCAGCCCCTTCGAGTACCCACAGTACTACCTGGCTGAGCCATG	1	1e-05	0
GCATGGCACAGAAGGCCCTAACTTCTACG-GCCC-TCTCCAATGCGATGGGTGTGGTACGCAGCCCCTTCGAGTACCCACAGTACTACCTGGCTGAGCCATG	1	1e-05	30GC
GAATGGCACAGAAGGCCCTAACTTCTACGTGCCCTTCTCCAATGCGATGGGTGTGGTACGCAG-CCCTTCGAGTAACCACAGTACTACCTGGCTGAGCCATG	1	1e-05	0
GAATGGCACAGAAGGCCCTAACTCCTACGTGCCCTTCTCCAATGCGATGGGTGTGGTACGCAGCCCCTTCGAGTATCCACAGTACTACCTGGCTGATCCATG	1	1e-05	0
GAATGGCACAGAAGGCCCTAAATTCTACGTGCCC-TCTCC-ATG-GATGGGTGTGGAACGAAGCCCCTTCGAGTAC--ACAGTCCTACCTGGCTGAGCCATG	1	1e-05	32T42TG75T78A
GAATGGCACAGAAGGCCCTAACTTCTACGTGCCCTTCTCCAAT--GATGGCTGTGGTACGCAGCCCCTTCGAGTACCCACAGTACTACCTGGCTGAGCCATG	1	1e-05	0
GAATGGCACAGAAGGCCCTAACTTCTACGTGCCCTTCTCCAATGTGATGGGTGTGGTACGCAGCCCCTTCGTGTACCCACAGTACTACCTGGCTGAGCCATG	1	1e-05	0
GAATGGCACAGAAGGCCCTAACTTCTACGTGCCCTTCTC-------ATGGGTGTGGTACGCAGCCCCTTCGAGTATCCACAGTACTACCTGGCTGAGCCATG	1	1e-05	0
GAATGGCACAGAAGGCACTAACTTCTACGTGCCCTTCTCCAA--CGATGGGTGTGGTACGCAGCCCCTTCGAGTACCCACAGTACTACCTGGCTGAGCCATG	1	1e-05	0
GAATGGCACAGAAGGCCCT---TTCT---TGCCCTTCTCCAATGCGATGGGTGTGGTACGCAGCCCCTTCGAGTACCCACAGTACTACCTGGCTGAGCCATG	1	1e-05	20TTG25TTT
GATTGGAACAGAAGGCCCTAACTTCTACGTGCCCTTCTCCAATGCGAT-GGT-TGGTACTCAGCCCCTTCGAGTACCCACAGTACTACCTGGCTGGGCCATG	1	1e-05	52GC
GAATGGCACAGAAGGCCCTAACTTCTACATGCCCTTCTCCAATGCGATGGGTGTGGTACGCAGCCCCTTCGAGTACCCACAGTACTACCTGGCTGAGCCGTG	1	1e-05	0
GAATGGCACAGAAGGCCCGAACTTCTACGTGCCCTTC-------CGATGGGTGTGGTACGCAGCCCCTTCGAGTACCCACAGTACTACCTGGCTGAGCCATG	1	1e-05	0
GAATGGCACAGAAGGCCCTAACTTCTACGTGCCCTTCTCCAATGCGACGGGCGTGGT--GCAGCCCCTTCGAG--CCCGCAGTACTACCTGGC-GA-CCATG	1	1e-05	59GG74AG94GA
GAACGGCACAG-AGGCCC-AA-TT-TATGTGCCCTTCTCCAACGCGATGGGCGTGGTACGCAGCCCCTTCGAGTACCCACAGTACTACCTGGCTGAGCCATG	1	1e-05	14GC22TT
GAATGGCACAGAAGGCCCTAACTTCTACGTGCCCTTCTCCAATGCGATGGGTGTGGTACGCAGCCCCTTCGAGTACCCACAGTACTACCTGGCTGAGCCATG	1	1e-05	42GGTCGCCCGACGCCCGGGCTTTGCCCGGGCGGCCTCAG81GAGCGAGCGAGCGCGCA
GAAAGGCACAGAAGGCCCTAACTTCTACGTGCCCTTCTCCAAT-CGATGGGTGTGGTACGCAGCCCCTTCGAGTACCCACAGTACTACCTGGCTGAGCCATG	1	1e-05	0
GAATGGCACAGAAGGCCCTAACTTCTACGTGCCCTTCTCCAA--CGATGGGTGTGGTACGCAGCCCCTTCGAGTACCCACAGTACCACCTGGCTGAGCCATG	1	1e-05	0
GAACGGCACAG-AGGCCC-AA-TT-TA--TGCCCTTCTCCAA--CGA--GGCGTGGT--GCAGCCCCTTCGAG--CCCGCAGTACTACCTGGC-GA-CCATG	1	1e-05	14GC22TT28TT44TCAC59GG74AG94GA
GAATGGCACAGAAGGCCCTAACTTCTACGCGCCCTTCTCCAATGCGATGGGTGTGGTACGTAGCCCCTTCGAGTACCCACAGTACTACCTGGCTGAGCCATG	1	1e-05	0
GAATGGCACAGAAGGCCCTAACTTCTACGTGCCCTTCTCCA---CGATGGGTGTGGCACGCAGCCCCTTCGAGTACCCACAGTACTACCTGGCTGAGCCATG	1	1e-05	86T
GAATGGCACAGAAGGACCTAACTTCTACGTGCCATTCTCCAATGCGATGGGTGTGGTACGCAGCCCCTTCGAGTACCCACAGTACTACCTGGCTGAGCCATG	1	1e-05	0
GAATGGCACAGAAGGCCCTAACTTCTACGTGCCCTTCTCCAAT-CGATGAGTGTGGTACGCAGCCCCTTCGAGTACCCACAGTACTACCTGGCTGAGCCATG	1	1e-05	0
GAATGGCACAG-AGGCCC-AA-TT-TATGTGGCCTTCTCCAA--CGA--GGCGTGGT--GCAGCCCCTTCGAG--CCCGCAGTACTACCTGGC-GA-CCATG	1	1e-05	14GC22TT44TCAC59GG74AG94GA
GAACGGCACAG-AGGCCC-AA-TT-TATGTGCCCTTCTCCAA--CGA--GGCGTGGT--GCAGCCCCTTCGAG--CCCGCAGTACTACCTGG--GA-CCATG	1	1e-05	14GC22TT44TCAC59GG74AG93GGA
GAATGGCACAGAAGGCCCTAACTTCTACGTGCCCTTCTCCAATGCGACGGGTGTGGTACGCAGCACCTTCGAGTACCCACAGTACTACCTGGCTGAGCCATG	1	1e-05	0
GAATGGCACAGAAGGCCCTAACTTCTACGTGCCCTTCTCCAATGCGATGGGTGTGGAACGCAGCCCCTTCGAGTCCCCACAGTACTACCTGGCTGAGCCATG	1	1e-05	0
GAATGGCACAGAAGGCCCTAACTTCTACGGGCCCTTCTCCAATGCGATGGGTGTGGTACGCAGCCCCTTCGAGTACCCACAGTACTACCTGGCTGGGCCATG	1	1e-05	0
GAATGGCACAGAAGGCCCTAACTTCTACGTGCCCTTCTCCAAAGCGACGGGTGTGGTACGTAGCCCCTTCGAGTACCCACAGTACTACCTGGCTGAGCCATG	1	1e-05	0
GAATGGCACAGAAGGCCCTAACTTCTACGTGCCCTTCTTCAATGTGATGGGTGTGGTACGCAGCCCCTTCGAGTACCCACAGTACTACCTGGCTGAGCCATG	1	1e-05	0
GAACGGCACAG--GGCCC-AA-TT-TATGTGCCCTTCTCCAATGCGATGGGTGTGGTACGCAGCCCCTTCGAGTACCCACAGTACTACCTGGCTGAGCCATG	1	1e-05	13GGC22TT
GAACGGCACAG-AGGCCC-AA-TT-TATGTGCCCTTCTCCAA--CGA--GGCGTGGT--GCAGCCCCTTCGAG---CCGCAGTACTACCTGGC-GA-CCATG	1	1e-05	14GC22TT44TCAC59GG70AA73C94GA
GAATGGCACAGAAGGCCCTAACTTCTACGTGCCCTTCTCCAATGCGATGGGTGTGGTACGCAGCCCCTTCAAGTACCCACAGTACTACCTGGCTGAGCCATG	1	1e-05	42T
GAATGGCACAGAAGGCCCTAACTTCTACGTGCCCTTCTCCAAT-CGATGGGTGTGGTACGCAGCCCCTTCGATTACCCACAGTACTACCTGGTTGAGCCATG	1	1e-05	0
GAATGGCACAGAAGGCCCTAACTTCTACGTGCCCTTCTCCAATGCGATGGGTGTGGTACGCAGCCCCTTCGAGTACCCACAGTACTACCTGGCTGAGCCATG	1	1e-05	43GCCCGGGCGGCCTCAGTGAGCGAGCGAGCGCGCA
GAATGGCACAGAAGGCCCTAACTTCTACGTGCTCTTCTCCAATGCGATGGGTGTGGTACGCAGCCCCTTCGAGTACCCACAGCACTACCTGGCTGAGCCATG	1	1e-05	0
GAATGGCACAGAAGGCCCTAACTTCTACGTGCCCTTCTCCAATG-GATGGGTGTGGT--GCAGCCCCTTCGAGTACCCACAGTACTACCTGGCTGAGCCATG	1	1e-05	55AA
GAATGGCACAGAAGGCCCTAACTTCTACGTGCCCTTCTCCAATGCGACGGGTGTGGTACGCAGCCCCTTCGAGTACCCACAGTACAACCTGGCTGAGCCATG	1	1e-05	0
GAATGGCACAGAAGGCCCTAACTTCTACGTGCCCTTCTCCAATGCGATGGGTGTGGTACGCAGCCCCTTCAAGTACCCACAGAACTACCTGGCTGAGCCATG	1	1e-05	0
GAATGGCACAGAAGGCCCCAACTTCTACGTGCCCTTCTCCA---CG--GGGAGTGGTACGCAGCCCCTTCGAGTACCCACAGTACTACCTGGCGGAGCCATG	1	1e-05	44TC
GAACGGCACAGAGGGCCCTAA-TT-TACGTGCCCTTCTCCAACGCGATGGGTGTGGTGCGCAGCCCCTTCGAGTACCCGCAGTACTACCTGGCTGAGCCATG	1	1e-05	22TT
GAATGGCACAGAAGGCCCTAACTTCTACGTGCCCTTCTCCAATGCGACGGGTGTGGTACGCAGCCCCTTCGAGTACCCACAGTACTACCTGGCTGAGCAATG	1	1e-05	0
GAATGGCACAGAAGGCCCTAACTTCTACGTGCCCTTCT-CAATGCGATGGGTGTGGTACGCAGCCCCTTCGAGTACCCACAGTACTACCTGGCTGAGCCATG	1	1e-05	42G
GAATGGCACAGAAGGCCCTAATTTCTACGTGCCCT---------------------TACGCAGCCCCTTCGAGTACCCACAGTACTACCTGGCTGAGCCATG	1	1e-05	0
GAATGGCACAGAAGGCCCTAACTTCTACGTGCCC----------------------TACGCAGCCCCTTCGAGTACCCACAGTACTACCTGGCTGAGCCATG	1	1e-05	0
GAATGGCACAGAAGGCCCTAACTTCTACGTGCCCTTCTCAAAT-CGATGGGTGTGGTACGCAGCCCCTTCGAGTACCCACAGTACTACCTGGCTGAGCCATG	1	1e-05	0
GAATAGCACAGAAGGCCCTAACTTCTACGTGCCCTTCTCCAAT-CGATGGGTGTGGTACGCAGCCCCTTCGAGTACCCACAGTACTACCTGGCTGAGCCATG	1	1e-05	0
GAATGGCACAGAAGGCCCTAACCTCTACGTGCCCTTCTCCAATGCGATGGGCGTGGTACGCAGCCCCTTCGAGTACCCACAGTACTACCTGGCTGAGCCTTG	1	1e-05	0
GAATGGCACAGAAGGTCCTAACTACTACGTGCCCTTCTCCAATGCGATGGGTGTGGTACGCAGCCCCTTCGAGTACCCACAGTACTACCTGGCTGAGCCATG	1	1e-05	0
GAATGGCACAGAAGGCCCTAACTTCTACGTGCCCTTCTCCAATGCGATGGGTTTGGTACGCAGCCCCTTCGAGTACCCACAGTACTACCTGGCTGGGCCATG	1	1e-05	0
GAATGGCACAGAAGGCCCTAACTTCTACGTGCCCTTCTCCAAT-CGATGGGTGTGGTACGCAGCCCCTTCGAGTACCCACAGTACTACCTGGCTGAGCCATG	1	1e-05	40A
GAACGGCACAGAAGGCCCTAACTTCTACGTGCCCTTCTCCAATGCGACGGGCGTGGTACGCAGCCCCTTCGAGTACCCGCAGTACTACCTGGCTGAGCCATG	1	1e-05	0
GAATGGCACAGAAGGCCCTAACTTCTACGTGCCCTTCTCCAATGCGATGGGTGTGGTACGCAGCCCCTTCGAGTACCCACAGTACTACCTGGCTGAGCCATG	1	1e-05	44GTTGGTCGCCCGGCCTCAGTGAGCGAGCGAGCGCGCAGAGAGGGAGTGGC
GAACGGCACAGACGGCCCTAACTTCTACGTGCCCTTCTCAAATGCGATGGGTGTGGTACGCAGCCCCTTCGAGTACCCACAGTACTACCCGGCTGAGCCATG	1	1e-05	0
GAATGGCACAGAAGGCCCTAACTTCTACGTGCCCTTCTCCAATGCGATGGGTGTGGTACGCAGCCCCTTCGAGTACCCACAGTACTACCTGGCTGAGCCATG	1	1e-05	44ACCCAGGATCTGTAGAGCAGGATCCTGTAGAGTTCTTTTCTGTAGTGGCTGCACTAACTTACAACCTCAC
GAACGGCACAG-AGGCCC-AA-TT-TATGTGCCCTTCTCCAA--CGA--GGCGTGGT--GCA-CCCCTTCGAG--CCCGCAGTACTACCTGGC-GA-CCATG	1	1e-05	14GC22TT44TCAC59GGA74AG94GA
GAATGGCACAGGAGGCCCTAACTTCTACGTGCCCT----------GATGGGTGTGGTACGCAGCCCCTTCGAGTACCCACAGTACTACCTGGCTGAGCCATG	1	1e-05	0
GCATGGCACAGAAGGCCCTAAATTCTACGTGCCCTTCTCCAATGGGATGGGTGTGGTACGCAGCCCCTTCGAGTACCCACAGTACTACCTGGCTGAGCCATG	1	1e-05	0
GAATGGCACAGAAGGCCCTAACTTCTACGTGCCCTTCTCCAA--CGATGGGTGTGGTACGCAGCCCCTTCGAGTACCCTCAGTACTACCTGGCTGAGCCATG	1	1e-05	0
GAATGGCACAGAAGGCCCTAACTTCTACGTGCCCTTCTCCAATGCGATGGGTGTGGTACGGAGCCCCTTCGAG--CCCGCAGTACTACCTGGC-GA-CCATG	1	1e-05	74AG94GA
GAATGGCACAGAAGGCCCTAACTTCTACGTGCCCTTCTCCAAT-CGATGTGTGTGGTACGCAGCCCCTTCGAGTACCCACAGTACTACCTGGCTGAGCCATG	1	1e-05	0
TAATGGCACAGAAGGCCCTAACTTCTACGTGCCCTTCTCCAATGCGATGGGTGTGGTACGCAGCCCCTTCGAGCACCCACAGTACTACCTGGCTGAGCCATG	1	1e-05	0
GAACGGCACAG-AGGCCC-AA-TT-TATGTGCCTTTCTCCAA--CGA-GGGTGTG---CGGAGCCCCTTCGAG--CCCGCAGTACTACCTGGC-GA-CCATG	1	1e-05	14GC22TT44TCAC51C55A74AG94GA
GAATGGCACAGAAGGCCCTACCTTCTACGTGCCCTTCTCCAATGCGACGGGTGTGGTACGCAGCCCCTACGAGTACCCACAGTACTACCTGGCTGAGCCATG	1	1e-05	0
GAATGGCACAGAAGGCCCTAACTTCTACGTGCCCTTCTCCAATGCGATGGGTGTGGTACGCAGCCCCTTCGAGTACCCACAGTACTACC-------------	1	1e-05	0
GAATGGCACAGAAGGCCCTAACTTCTACGTGCCCTTCTCCAATGCGATGGGTGTGGTACGCAGCCCCTTCGAGTACCCACAGTACTACCTGGC-GA-CCATG	1	1e-05	44TCGCCCGGCCTCAGTGAGCGAGCGAGCGCGCAGAGAGGGAGTGGCCA
GAATGGCACAGAAGGCCCTAACTTCTACGTGCCCTTCTCCAATGCGATGGGTGTGGTACGCAGCCCCTTCGAGTACCCACAGTACTACCTGGCTGAGCCATG	1	1e-05	44TCGCCCGACGCCCGGGCTTTGCCCGGGCGGCCTCAGTGAGCGAGCGAGCGCGCAGAGAGGGAGTGGCCA
GAATGGCACAGAAGGCCCTAACTTCTACGTGCCCTTCTCCAATGCGATGGGTGTGGTACGCAGCCCCTTCAAGTACCCACATTACTACCTGGCTGAGCCA-G	1	1e-05	0
GAACGGCACAGACGGCCCCAA-TT-TATGTGCCCTTCTCCAA--CGA--GGCGTGGT--GCAGCCCCTTCGAG--CCCGCAGTACTACCTGGC-GA-CCATG	1	1e-05	22TT44TCAC59GG74AG94GA
GAATGGCACAGAAGACCCTAACTTCTACGTGCCCTTCTCCAATGCGATGGGTGTGGTACGCAGCCCCTTCGAGTACCCACAGTACTACCTGGCTGAGCCATG	1	1e-05	44C
GAACGGCACAG-AGGCCC-AA-TT-TATGTGTCCTTCTCCAA--CGA--GGCGTGGT--GCAGCCCCTTCGAG--CCCGCAGTACTACCTGGC-GA-CCATG	1	1e-05	14GC22TT44TCAC59GG74AG94GA
GAATGGCACAGAAGGCCCTAACTTCTACGTGCCCTTCTCCAATGCGATGGGTGTGGTACGCAGCCCCTTCGAGTACCCACAGTAATACCTGGCTGAGCCATG	1	1e-05	43G
GAATGGCACAGAAGGCCCTAACTTCTACGTGCCCTTATCCAATG--------GTGGTACGCAGCCCCTTCGAGTACCCACAGTACTACCTGGCTGAGCCATG	1	1e-05	0
GAATGGCACAGAAGGCCCTAACTTCTACGTGCCCTTCTCCAA--CGATGGGTGTGGTACGCAGCCCCTTCGAGTACCCAAAGTACTACCTGGCTGAGCCATG	1	1e-05	0
GAATGGCACAGAAGGCCCTAACTTCTACGTGCCCTTCTCCAATGCGATGGGTGTGGTACGCAGCCCCTTCGAGTACCCACAGTACTACC-GGCTGAGCCATG	1	1e-05	0
GAATGGCACAGACGGCCCCAACTTCTACGTGCCCTTCTCCAA--CGATGGGTGTGGTACGCAGCCCCTTCGAGTACCCACAGTACTACCTGGCTGAGCCATG	1	1e-05	0
GAACGGCACAGAAGGCCCCAA-TT-TATGTGCCCTTCTCCAA--CGA--GGCGTGGTACGCAGCCCCTTCGAGCACCCGCAGTACTACCTGGCTGAACCATG	1	1e-05	22TT44TCAC
GAATGGCACAGAAGGCCCTAACTTCTACGTGCCCTTCTC--ATGCGATGGGTGTGGTACGCAGCCCCTTCGAGTACCCACAGTACTACCTGGCTGAGCCATG	1	1e-05	38A41T
GAATGGCACAGAAGGCCCTAACTTCTACGTGC--TTCTCCAATGCGATGGGTGTGGTACGCAGCCCCTTCGAGTACCCACAGTACTACCTGGCTGAGCCATG	1	1e-05	31TT
GAATGGCACAGAAGGCCCTAACTTCTACGTGCCCTTCTCCAATGCGACGGGTGTGGTACGCAGCCCCTTCGAGTACCCACAGTACTACCTGGCGGAGCCATG	1	1e-05	0
GAATGGCACAGAAGGCCCTAACTTCTACGTGCCCTTCTCCAATGCGATGGGTGTGGTACGCAGCCCCTTCGAGTACCCACAGTACTACC-GGCTGAGCCATG	1	1e-05	44C
GAATGGCACAGAAGGCCCTAACTTCTACGTTCCCTTCTCCAATGCGATGGGTGTGGTACGCAGCCCCTTCGAGTACCCACAGTACTACCTGGCTGAGCCATG	1	1e-05	44T
GAATGGCACAGAAGGTCCTAACTTCTACGTGCCCTTCTCCAATGCGATGGGTGTGGTACGCAGCCCCTTCGAGTACCCACAGTACTACCTGGCTGAGCCATG	1	1e-05	44C
GACTGGCACAGAAGGCCCTAACTTCTACGTGCCCTTCTCCAATGCGATGGGTGTGGTACGCAGCCCCTTCGAGTACCCACAGTACTACCTGGCTGGGCCATG	1	1e-05	0
GAATGGCACAGAAGGTCCTAACTTCTACGTGCCCTTCTCCAATGCGATGGGTGTGGTACGCAGCCCCTTCGAGTACCCACAGTACTACCTGGCTGAGCCATG	1	1e-05	44A
GAATGGCA-A-AAGGCCCTAACTTCTACGTGCCCTTCTCCA---CGATGGGTGTGGTACGCAGCCCCTTCGAGTACCCACAGTACTACCTGGCTGAGCCATG	1	1e-05	6AA
GAATGGCACAGAAGGCCCTAACTTCTACGTGCCCTTCTCCAA-GCGATGGGCGTGGTACGCAGCCCCTTCGAGTACCCACAGTACTACCTGGCTGAGCCATG	1	1e-05	0
GAATGGCACAGAAGGCCCTAACTTCTACGTGCCCTTCTCCAATGCGATGGGTGTGGTACGCAGCCCCTTCGAGAACTCATAGTATTACCTGGCTGAGCTATG	1	1e-05	0
GAACGGCACAG--GGCCC-AA-TT-TATGTGCCCTCCTCCAA--CGA--GGCGTGGT--GCAGCCCCTTCGAG--CCCGCAGTACTACCTGGC-GA-CCATG	1	1e-05	13GGC22TT44TCAC59GG74AG94GA
GAATGGCACAGAAGGCCCTAACTTCTACGTGCCCTTCTCCAATG-GATGGGAGTGGTACGCAGCCCCTTCGAGTACCCACAGTACTACCTGGCTGAGCCATG	1	1e-05	0
GAATGGCACAGAAGGCCCTAACTTCTACGTGCCCTTCTCCAA---GATGGGTGTGGTACGCAGCCCCTTCAAGTACCCACAGTACTACCTGGCTGAGCCATG	1	1e-05	0
GAATGGCACAGAAGGCCCTAACTTCTACGTGCCCTTCTCCAATGCGATGGGTGTGGTACGCAGCCCCTTCGGGTACCCACAGTACTACCTGGCTGAGCCATG	1	1e-05	43GCTGCGCGCTCGCTCGCTCACTGAGGCCGGGC
GAATGGCACAGAAGGCCCTAACTTCTACGTGCCCTTCTCCA---CCATGGGTGTGGTACGCAGCCCCTTCGAGTACCCACAGTACTACCTGGCTGAGCCATG	1	1e-05	0
GAATGGCACAGAAGGCCCTAACTTCTACGTGCCCTTTTCCAATACGATGGGTGTGGTACGCAGCCCCTTCGAGTACCCACAGAACTACCTGGCTGAGCCATG	1	1e-05	0
GAATTGCACAGAAGGCCCTAACGGCAAAGTGCCCTTCTCCAATGCGACGGGTGTGGTACGCAGCCCCTTCGAGTACCCACAGTACTACCTGGCTGTGCCATG	1	1e-05	0
GAATGGCACAGAAGGCCCTAACTTCTACGTGCCCTTCTCCAATGCGATGGGTGTGGTACGCAGCCCCTTCGAGTACCCACAGTACTACCTGGCTGAGCCATG	1	1e-05	43GAAGGTCGCCCGACGCCCGGGCTTTGCCCGGGCGGCCTCAGTGAGCGAGCGAGC
GAATGGCACAGAAGGCCCTGACTTCTACGTGCCCTTCTCCAATGCGATGGGTGTGGTACACAGCCCCTTCGAGTACCCACAGTACTACCTGGCTGAGCCATG	1	1e-05	0
GAATGGCACAGAAGGCCCTAACTTCTACGTGCCCTTCTCCAATGCGATGGGTGT--TACGCAGCCCCTTCGAGTACCCACAGTACTACCTGGCTGAGCCATG	1	1e-05	51TT
GAATGGCACAGAAGGCCCTAACTTCTACGTGCCCTTCTCCAATGCGATGGGTATGGTACGCAGCCCCTTCGAGTACCCACAGTACTACCCGGCTGAGCCATG	1	1e-05	0
GAATGGCACAGAAGGCCCTAACTTCTACGTGCCCTTCTCCGATGCGACGGGTGTGGTACGCAGCCCCTTCGAGTACCCACAGTACTACCTGGCTGAGCCATG	1	1e-05	0
GAATGGCACAGAAGGCCCTCACTTCTACGTGCCCTTCTCCAATGCGATGGGTGTGGTACGCCGCCCCTTCGAGTACCCACAGTACTACCTGGCTGAGCCATG	1	1e-05	0
GAATGACACAGAAGGCCCTAACTTCTACGTGCCCTTCTCCAATGGGATGGGTGTGGTACGCAGCCCCTTCGAGTACCCACAGTACTACCTGGCTGAGCCATG	1	1e-05	0
GAATGGCACAGAAGGCCCTAACTTCTACGTGCCCTTCTCCAATGCGATGGGTGTGATACGCAGCCTCTTCGAGTACCCACAGTACTACCTGGCTGAGCCATG	1	1e-05	0
GAATGGCACAGAAGGCCCTAACTCCTACGTGCCCTTCTCCAA--CGATGGGTGTGGTACGCAGCCCCTTCGAGTACCCACAGTACTACCTGGCTGAGCCATG	1	1e-05	0
G--TGGCACAGAAGGCCCTAACTTCTAAGTGCCCTTCTCCAATGCGATGGG--TGGTACGCA--CCCTACGAGTACCCACAGTACTACCTGGCTGCGCCATG	1	1e-05	2AC50CA61AT
GAATGGCACAGAAGGCCCTAACTTCTACGTGCCCTTCTCCAATGCGATGGGCGTGGTACGCAGCCCCTTCGGGTACCCACAGTACTACCTGGCTGGGCCATG	1	1e-05	0
GAATGGCACAGAAGGCCCTAACTTCTACGTGCCCTTCTCCAA--CGATGGGTGTGGTACGCAGCCCCTTCGAGTACTCACAGTACTACCTGGCTGAGCCATG	1	1e-05	0
GAATGGCACAGAAGGCCCTAACTTCTACGTGCCCTTCTCCAAT--GATGGGTGCGGTACGCAGCCCCTTCGAGTACCCACAGTACTACCTGGCTGAGCCATG	1	1e-05	0
GAATGGTACAGAAGGCCATAACTTCTACGTGCCCTTCTCCAATGCGATGGGTGTGGTACGAAGCCCCTTCGAGTACCCACAGTACTACCTGGCTGAGCCATG	1	1e-05	0
GAACGGCACAG-AGGCCC-AA-TT-TATGTGCCCTTCTCCAA--CGA--GGCGTGGT--GCAGCCCCTTCGAG--CCCACAGTATTACCTGGCTGAGCCATG	1	1e-05	14GC22TT44TCAC59GG74AG
GAATGGCACAGAAGGCCCTAACTTCTACGTGCCCTTCTCCAATGCGATGGGTGTGGTACGCAGCCCCTTCGAGTACCCACAGTACTACCTGGCTGAGCCATG	1	1e-05	44TTGGTCGCCCGGCCTCAGTGAGCGAGCGAGCGCGCAGAGAGGGAGT
GAATGGCACAGAAGGCCCTAACTTCTACGTGCCCTTCTCCAATGCGACGGGTGTGGTACGCAGCCGCTTCGAGTACCCACAGTACTACCTGGCTGAGCCATG	1	1e-05	0
GAATGGCACAGAAGGCCCTAAC-----------------------------TG-GGTACGCAGCCCCTTCGAGTACCCACAGTACTACCTGGCTGAGCCATG	1	1e-05	0
GAATGGCACAGAAGGCCCTAACTTCTACGTGCCATTCTCCAATGCGATGGGTGTGATACGCAGCCCCTTCGAGTACCCACAGTACTACCTGGCTGAGCCATG	1	1e-05	0
GACTGGCACAGAAGGCCCTAACTTCTACGTGCCCTTCTCCAATGCGATGGGTGGGGTACGCAACCCCTTCGAGTACCCACAGTACTACCTGGCTGAGCCATG	1	1e-05	0
GAATGGAACAGAAGGCCCTAACTTCTACGTGCCCTTCTCCACTGCGATGGGTGTGGTACGCAGCCCCTTCGAGTACCCACAGTACTACCTGGCTGAGCCATG	1	1e-05	0
GAATGGCACAGAAGGCCCTAACTTCTACGTGCCCTTCTCCAATGCGATGGGTGTGGTACGCAGCCCCTTCGAGTACCCACAGTACTACCTGGCTGAGCCATG	1	1e-05	43GTTGGCCACTCCCTCTCTGCGCGCTCGCTCGCTCACTGAGGCCGGGCGACCAAAGGTCGCCCGACGCCCGGGCTTTGCCCGGGCG
GAATGGCACAGAAGGCCCTAACTTCTACGTGCCCTTCTCCAATGCGATGGGTGTGGTACGCAGCCCCTTCGAGTACCCACAGTACTACCTGGCTGAGCCATG	1	1e-05	39TTGGCCACTCCCTCTCTGCGCGCTCGCTCGCTCACTGAGGCCGCCCGGG91AGCCCGGGCG
GAATGGCACAGAAGGCCCTAACTTCTACGTGCCCTTCTCCAATGCGATGGGTGTGGTACGCAGCCCCTTCGAGTACCCACAGTACTACCTGGCTGAGCCATG	1	1e-05	44TTGGCCACTCCCTCTCTGCGCGCTCGCT74CTC78C81AGGCCGGGCGACCAAACGAT
GAATGGCACAGAAGGCCCTAACTTCTACGTGCCCTTCTACAATGCGATGGGTGTGGTACGCAGCCCCTTCGAGTACCCACAGTACTACCTGGCTGGGCCATG	1	1e-05	48GG
GAATGGCACAGAAGGCCCTAACTTCTACGTGCCCTTCTCCAATGCGATGGGTGTGGTACGCGGCCCCTTCGAGCACCCACAGTACTACCTGGCTGAGCCATG	1	1e-05	0
GAATGGCACAGAAGGCCCTAACTTCTACGTGCCCTTCTCCAA--CGATGGGTGTGGTACGCAGCCCATTCGAGTACCCACAGTACTACCTGGCTGAGCCATG	1	1e-05	0
#NAME?	1	1e-05	0
GAATGGCACAGAAGGCCCCAACTTTTACGTGCCCTTCTCCAACGCGATGGATGTGGTACGGAGCCCCTTCGAGCACCCGCAGTACTACCTGGCGGAGCCATG	1	1e-05	0
GAATGGCACAGAAGGCCCTAACTTCCACGTGCCCTTCTCCAAT--GATGGGTGTGGTACGCAGCCCCTTCGAGTACCCACAGTACTACCTGGCTGAGCCATG	1	1e-05	0
GAATGGCACAGAAGGCCCTAACTTCTACGTGCCCTTCTCCAATGCGATGTGTGTGGTACGCAGCCCCTTCGAGTACCCACAGTACTACCTGGCTGAGCCATG	1	1e-05	44C
GAATGGCACAGAAGGCCCTAACTTCTACGTGCCCTTCTCCAAT-CGATGGGTGTGGTCCGCAGCCCCTTCGAGTACCCACAGTACTACCTGGCTGAGCCATG	1	1e-05	0
GAATGGTACAGAAGGCCCTAACTTCTACGTGCCCTTCTCCAAT--GATGGGTGTGGTACGCAGCCCCTTCGAGTACCCACAGTACTACCTGGCTGAGCCATG	1	1e-05	44T
GAATGGCACAGAAGGCCCTAACTTCTACGTGCCCTTCTCCAATGCGATGGGTGTGGTACGCAG-CCCTTCGAGCACCCACAGTACTACCTGGCTGAGCCATG	1	1e-05	0
GAATGGCACAGAAGGCCCTAACTTCTACGTGCCCTTCTCCAAT--GATGGGTGTGGAACGCAGCCCCTTCGAGTACCCACAGTACTACCTGGCTGAGCCATG	1	1e-05	0
GAATGGCACAGAAGGCCCTAACTTCTACGTGCCCTTCTCCAATGCGATGGGTGTGGTACGCAGCCCCTTCGAGTACCCACAGTACTACCTGGCTGAGCCATG	1	1e-05	34TCCAAAGGTCGCCCGACGCCCGGGCT62GCCCGGGCGGC76AGTGAGCGAGCGAGCGCG96GAGAGGG
GCATGGCACAGAAGGCCCTAACTTCTACGTGCCCTTCTCCAACGCGATGGGTGTGGTACGCAGCCCCTTCGAGTACCCACAGTACTACCTGGCTGAGCCATG	1	1e-05	0
GAATGGCACAGAAGGCCCTAACTTCTACGTGCCCTTCTCCAATGCGATGGGTGTGGTACGCAGCCCCTTCGAGTACCCACAGTACTACCTGGCTGAGCCATG	1	1e-05	43GGAG
GAATGGCACAGAAGGCCCTACCTTCTACGGGCCCTTCTCCAATGCGATGGGTGTGGTACGCAGCCCCTTCGAGTACCCACAGTACTACCTGGCTGAGCCATG	1	1e-05	0
GAATGGCACAGAAGGCCCTAACTTCTACGTGCCCTTCTCCAATGCGATGGGTGTGGTACGCAGTCCCTTCGAGTACCCACAGTACTACCTGGCTGAGCCATG	1	1e-05	44C
GAATGGCACAGAAGGCCCTAACTTCTACGTGCCCTTCTCCAATGCGATGGGTGTGGTACGCAGCCCCTTCGAGTACCCACATTACTACCTGGTTGAGCCATG	1	1e-05	0
GAATGGCACAGAAGGCCCTAACTTCTACGTGCCCTTCTCCAATG-GATGGGTGTGGTACGCAGCCCCTTAGAGTACCCACAGTACTACCTGGCTGAGCCATG	1	1e-05	0
GAATGGCACAGAAGGCCCTAACTTCTACGTGCCCTTCTCC-ATGCGATGGGTGTGGTACGCAGCCCCTTCGAGTACCCACAGTACTCCCTGGCTGAGCCATG	1	1e-05	42G
GAATGGCACAGAAGGCCCTAACTTCTATGTGCCCTTCTCCAA--CGATGGGTGTGGTACGCAGCCCCTTCGAGTACCCACAGTACTACCTGGCTGAGCCATG	1	1e-05	0
GAATGGCACAGAAGGCCCTAACTTCTACGTGCCCTTCTCCAA--CGATGGGTGTGGTACGCAGCCCCTTCGAGTACCCACTGTACTACCTGGCTGAGCCATG	1	1e-05	0
GAATGGCACAGAAGGCCCTAACTTCTACGTGCCCTTCTCCAATGCGGTGGGTGTGGTACACAGCCCCTTCGAGTACCCACAGTACTACCTGACTGAGACATG	1	1e-05	0
GAATGGCACAGAAGGCCCTAACTTCTACGTGCCCTTCTCCAATGCGATGGGTGTGGTACGCAGCCCCTTCGAGTACCCACAGTACTACCTGGCTGAGCCATG	1	1e-05	36GCCCGGGCTTTGCCCGGGCGGC61AGTGAGCGAGCGAGCGCG81GAGAGGG89G92GCCAA
GAATGGCACAGAAGGCCCTAACTTCTACGTGCCCTTCTCCAATGCGACGGGTGTGGTACGCAGCCCCTTCGAGTACCCACAGTACTGCTTGGCTGAGCCATG	1	1e-05	0
GAATGGCACAGAAGGCCCTAACTTCTACGTGCCCTTCTCCAA-----------------GCA---CCTTCGAGTACCCACAGTACTACCTGGCTGAGCCATG	1	1e-05	0
GAATGGCACAGAAGGCCCTAACTTCTACGTGCCCTTCTCCAATGCGACGGGTGTGGTACGCAGCCCCTTCGAGTACCCAAAGTACTACCTGGCTGAGCCATG	1	1e-05	0
GAATGGCACAGAAGGCCCTAACTTCTACGTGCCCTTCTCCAATG-GATGGGTGTGGTACGCAGCCCCTTCGAGTACCCACAGTACTACCTGGCTGAGCCATG	1	1e-05	45TG51A54TGGCCACTCCCTCTCTGCGCGCTCGCTC83CTCAC90AGGCCGCCCGGGCAA
GAATGGCACAGAAGGCCCTAACTTCTACGTGCCCTTCTCCAATGCAATGGGTGTGGTACGCAGCCCCTTCGAGTACCCACGGTACTACCTGGCTGAGCCATG	1	1e-05	0
GAATGGCACAGAAGGCCCTAACTTCTACGTGCCCTTCTC--ATGCGACGGGTGTGGTACGCAGCCCCTTCGAGTACCCACAGTACTACCTGGCTGAGCCATG	1	1e-05	38G41G
GAATGGCACAGAAGGCCCTAACTTCTACGTGCCCTTCTCCAATGCGATGGGTGTGGTACGCAGCCCCTT--AGTACCCACAGTACTACCTGGCTGAGCCATG	1	1e-05	0
GAATGGCACAGAAGGCCCTAACTTCTACGGGCCCTTATCCAATGCGATGGGTGTGGTACGCAGCCCCTTCGAGTACCCACAGTACTACCTGGCTGAGCCATG	1	1e-05	0
GAATGGCACAGAAGGCCCTAACTTCTACGTGCCCTTCTCCAATGCGATGGGTGTGGTACGCAGCCCCTTCGAGTACCCACAGTACTACCCGGCTGGGCCATG	1	1e-05	0
#NAME?	1	1e-05	0
GAATGGCACAGAAGGCCCTAACTTCTACGTGCCCTTCTCCAATGCGATGGGTGTGGTACGCAGCCCCTTCGAGTACCCACAGTACTACCTGGCTGAGCCATG	1	1e-05	39TTGACTTGGTCGCCCGGCCTCAGTGAGCGAGCGAGCGCG80GAGAGGG88G90G
GAATGGCACAGAAGGCCCTAACTTCTGCGTGCCCTTCTCCAATG-GATGGGTGTGGTACGCAGCCCCTTCGAGTACCCACAGTACTACCTGGCTGAGCCATG	1	1e-05	0
GAATGGCACAGAAGGCCCTAACTTCTACGTGCCCTTCTCCAATGAGATGGGTGTGGTACGAAGCCCCTTCGAGTACCCACAGTACTACCTGGCTGAGCCATG	1	1e-05	0
GAAGGGCACAGAAGGCCCTAACTTCTACGTGCCCTTCTCCAATGCGATGGGTGTGGTACGCAGCCCCTTCGAGTACCCACAGTACTACCTGGCTGAGCCATG	1	1e-05	0
GAATGGCACAGAAGGCCCTAACTTCTACGTGCCCTTCTCCAATGGGATGGGTGTGGTACGCAGCCCCTTCGGGTACCCACAGTACTACCTGGCTGAGCCATG	1	1e-05	0
GAATGGCACAGACGGCCCTAACTTCTACGTGCCCTTCTCCAATGCGATGGGTGTGGTACGCAGCCCCTTCGAGTACCCACAGTACTCCCTGGCTGAGCCATG	1	1e-05	0
GAATGGCACAGAAGGCCCTAACTTCTACGTGCCCTTCTCCAA--CGATGGGTGTGGTACGCAGCCCCTTCGAGTACCCACAGTACTACCTGGCTGAGCCATA	1	1e-05	0
GAATGGCACAGAAGGCCCTAACTTCTACGTGCCCTTCTCCAATGCGATGGGTGTGGTACGCAGCGCCTTCAAGTACCCACAGTATTACCTGGCTGAGCCATG	1	1e-05	0
GAATGGCACAGATGGCCCTAACTTCTACGTGCCCTTCTCCAATGCGCTGGGTGTGGTACGCAGCCCCTTCGAGTACCCACAGTACTACCTGGCTGAGCCATG	1	1e-05	0
GCATGGCACAGAAGGCCCTAACTTCTACGTGCCCCTCTCCAATGCGATGGGTGTGGTACGCAGCCCCTTCGAGTACCCACAGTACTACCTGGCTGAGCCATG	1	1e-05	0
GAATGGCACAGAAGGCCCTAACTTCTACGTGCCCTTCTCCAATGCGATGGGTGTGGTACGCAGCCCCTTCGAGTACCCACAGTACTACCTGGCTGAGCCATG	1	1e-05	36GGCTTTGGTCGCCCGGC56AGTGAGCGAGCGAGCGCG76GAGAGGG84G87GC
GAATGGCACAGAAGGCCCTAACTTCTACGTGCCCTTCTCCAATGCGATGGGTGTGGTACGCAGCCCCTTCGAGTACCCACAGTACTACCTGGCTGAGCCATG	1	1e-05	43CGATCAGGTACTTGGCGTTCTCTTTGCCGGTGGTCCG81A
GAATGGCACAGAAGGCCCTAACTTCTACGTTCCCTTCTCCAATGCGATGGGTGTGGTACGCAGCCCCTTCGAGTACCCACAGTACTACCTGGCTGTGCCATG	1	1e-05	0
GAATGGCACAGAAGGCCCTAACTTCTACGTGCCCTTCTCCAATGCGATGGGTGTGGTACGCAG-CCCTTCGAGTACCCACAGTACTACCTGGCTGAGCCATG	1	1e-05	66TT
GAATGGCACAGAAGGCCCTAACTTCTACGTGCCCTTCTCCAAT-CGATGGGTGTGGTACGCAGCCCCTTTGAGTACCCACAGTACTACCTGGCTGAGCCATG	1	1e-05	0
GAATGGCACAGAAGGCCCTAACTTCTACGTGCCCTTCTCCAATG-GATGGGTGTGGTACGCAGCCCATTCGAGTACCCACAGTACTACCTGGCTGAGCCATG	1	1e-05	0
GAATGGCACAGAAGGCCCTAACTTCTACGTGCCCTTCTCCAATGCGATGGGTGTGGTACGCAGCCCCTCCGAGTACCCACAGTACTACCTGGCCGAGCCATG	1	1e-05	0
TAATGGCACAGAAGGCCCTAACTTCTACGTGCCCTTCTCCAATGCGATGGGTGTGGTACGCATCCCCTTCGAGTACCCACAGTACTACCTGGCTGAGCCATG	1	1e-05	0
GAATGGCACAGAAGGCCCTAACTTCTACGTGCCCTTCTCCAATGCGACGGGTGTGGTACGCAGCCCCTTCGAGTACCCACAGTACTACCTGCCTGAGCCATG	1	1e-05	0
GAATGACACAGAAGGCCCTAACTTCTAC--GCCCTTCTCCAATGCGATGAGTGTGGTACGCAGCCACTTCGAGTACCCACAGTACTACCTGGCTGAGCCATG	1	1e-05	30GA
GAATAGCACAGAAGGCCCTAACTTCTACGTGCCCTTCTCCAAT------GGTGTGGTACGCAGCCCCTTCGAGTACCCACAGTACTACCTGGCTGAGCCATG	1	1e-05	0
GAATGGCACAGAAGGCCCTAACTTCTACGTGCCCTTCTCCAAT-CGATGGGTGTGGTACGCACCCCCTTCGAGTACCCACAGTACTACCTGGCTGAGCCATG	1	1e-05	0
GAATGGCACAGAAGGCCCTAACTTCTACGTGCCCTTCTCCAATGCGATGGGTGTGGTACGCAGCCCCTTCGAGTACCCACAGTACTACGTGGCTGAGCCATG	1	1e-05	0
GAATGGCACAGAAGGCCCTAACTTCTACGTGCCCT--TCCGATGCGATGGGTGTGGTACGCAGCCCCTTCGAGTACCCACAGTACTACCTGGCTGAGCCATG	1	1e-05	0
GAACGGCACAGAAGGCCCTAACTTCTACGTGCCCTTCTCCAA---------TGTGGTACGCAGCCCCTTCGAGTACCCACAGTACTACCTGGCTGAGCCATG	1	1e-05	0
GAATGGCACAGTCGGCCCTAACTTCTACGTGCCCTTCTCCAATGCGATGGGTGTGGTACGCAGCCCCTTCGAGTACCCACAGTACTACCTGGTTGAGCCATG	1	1e-05	0
GAATGGCACAGAAGGCCCTAACTTCCACGTGCCCTTCTCCAATGCGATGGGTGTGGTACGCAGCCCCTTCGTGTACCCACAGTACTACCTGGCTGAGCCATG	1	1e-05	0
GAATGGCACAGAAGGCCCTAACTTCTACGTGCCCTTCTCCAATGCGATGGGTGTGGTACGCAGCCCCTTCGAGTACCCACAGTACTACCTGGCTGAGCCATG	1	1e-05	44GCGCTCGCT55CTC59C62AGGCCGCCCGGGCAAA79CCC
GAATGGCACAGAAGGCCCTAACTTCTACGCGCCCTTCTCCAATG-GATGGGAGTGGTACGCAGCCCCTTCGAGTACCCACAGTACTACCTGGCTGAGCCATG	1	1e-05	0
GAATGGCACAGAAGGCCCTAACTTCTAGGTGCCCTTCTCCAATG-GATGGGTGTGGTACGCAGCCCCTTCGAGTACCCACAGTACTACCTGGCTGAGCCATG	1	1e-05	0
GAATGGCACAGAAGGCCCTAACTTCTACGTGCTCTTCCCCAATGCGACGGGTGTGGTACGCAGCACCTTTGAATACCCACAGT--TACCAGGCTGAGCCATG	1	1e-05	82CA
GAATGGCACAGAAGGCCCTAACTTCTACGTGCCCTTCTCCAATGCGATGGGTGCGGTACGCACCCCCTTCGAGTACCCACAGTACTACCTGGCTGAGCCATG	1	1e-05	0
GAATGGCACAGAAGGCCCTAACTCCTACGTGCCCTTC------------------GTACGCAGCCCCTTCGAGTACCCACAGTACTACCTGGCTGAGCCATG	1	1e-05	0
GAATGGCACAGAAGGCCCTAACTTCTACGTGCCCTTCTCCAAAGCGACGGGTGTGGTACGCAGCCCCTTCGAGTACCCACAGTACTACCTGGCTGAGCCATG	1	1e-05	0
GAACGGCACAG-AGGCCC-AA-TT-TATGTGCCCTTCTCCAA--CGA--GG--TGGT--GCAGCCCCTTCGAG--CCCGCAGTACTACCTGGC-GA-CCATG	1	1e-05	14GC22TT44TCAC50AC59GG74AG94GA
GAATGCCACAGAAGGCCCTAACTTCTACGTGCCCTTCTCCAATGCGATGGGTGTGGTACGCAGCCCCTTCTAGTACCCACCGTACTACCTGGCTGAGCCATG	1	1e-05	0
GAATGGCACAGAAGGCCCTAACTTCTACGTGCCCTTCTCCAATGCGATGGGTGTGGTACGCAGCCCCTTCGAGTACCCACAGTACTACCTGGCTGAGCCATG	1	1e-05	44TTGGCCACTCCCTCTCTGCGCGCTCGCTCGCTCACTGAGGCCGCCCACCA
GAATGGCATAGAAGGCCCTAACTTCTACGTGCCCTTCTCCA---CGATGGGTGTGGTACGCAGCCCCTTCGAGTACCCACAGTACTACCTGGCTGAGCCATG	1	1e-05	0
GGATTGCACAGAAGGCCCTAACTTCCACG-G-CCTTC-CC-ATGCGATGGGTGTGGTACGCAGCCCCTTCGAGTACCCACAGTACTACCTGGCTGAGCCATG	1	1e-05	27GG35CC
GAATGGCACAGAAGGCCCTAACTTCTACGTGCCCTTCTCCAATGCGATGGATGTGGTACGCAGCCCCTTCGAGTACCCACAGTACTTCCTGGCTGAGCCATG	1	1e-05	0
GAACGGCACAG-AGGCCC-AA-TT-TATGTGCCCTTCTCCAATGCG-T-GGTGTGG-----AGCCCCTTCGAG--CCCGCAGTACTACCTGGC-GA-CCATG	1	1e-05	14GC22TT42CG45CACAG74AG94GA
GAATGGCACAGAAGGCCCTAACTTCTACGTGCCCTTCTCCAATGCGCTGGGAGTGGTACGCAGCCCCTTCGAGTACCCACAGTACTACCTGGCTGGGCCATG	1	1e-05	0
GAATGGCACAGAAGGCCCTAACTTCTACGTGCCCTTTTCCAATGCGATGGGCGTGGCACGCAGCCCCTTCGGGTACCCACAGTACTACCTGGCTGAGCCATG	1	1e-05	0
GAATGGCACAGAAGGCCCTAAATTATACGTGCCCTTCT-CAATGCGATGGGTGTGGTACGCAGCCCCTTCGAGTACCCACAGTACTACCTGGCTGAGCCATG	1	1e-05	41T
GAATGGCACAGAAGGCCCTAACTTCTACGTGCACTTCTCCAAT-CGATGGGTGTGGTACGCAGCCCCTTCGAGTACCCACAGTACTACCTGGCTGAGCCATG	1	1e-05	0
GAACGGCACAG-AGGCCCT---TT-TATGTGCCCTTCTCCAA--CGA--GGCGTGGT--GCAGCCCCTTCGAG--CCCGCAGTACTACCTGGC-GA-CCATG	1	1e-05	14GC19ATT44TCAC59GG74AG94GA
GAACGGCACAG-AGGCCC-AA-TT-TATGTGCTCTTCTCCAA--CGA--GGCGTGGT--GCAGCCCCTTCGAG--CCCGCAGTAATACCTGGC-GA-CCATG	1	1e-05	14GC22TT44TCAC59GG74AG94GA
GAATGGCACAGAAGGCCCTAACTTCTACGTGCCCTTCTCCAATGCGATGGGT-T-GTACGCAGCCCCTTCGAGTACCCACAGTACTACCTGGCTGAGCCATG	1	1e-05	51TT
GAACGGCACAG-AGGCCC-AA-TT-TATGTGCCCTTCTCCAA--CGA--GGCGTGGT--GCAGCCCCTTCGAG--CCCGCAGTACTACCTGGC-GA-CCATG	1	1e-05	14GC22TT44TCAC59GG74AG94AA
GAATGGCACAGAAGGCCCTAACTTCTACGTGCCCTCCTCCAATGCGATGGGTGTGGTACGCAGCCCCTTCGAGTACCCACAGTACTACCTGTCTG-GCCATG	1	1e-05	93T
GAATGGCACAGAAGGCCCTAACTTCTACGTGCCCTTCTCCAATGCGATGGGTGTGGTACGCAGCCCCTTCGAGTACCCACAGTACTACCTGGCTGAGCCATG	1	1e-05	43AGTCGCCCGGCCTCAGTGAGCGAGCGAGCGCGCAGAGAGGGAGTG89CCAA
GAATGGCACAGAAGGCCCTAACTTCTACGTGCCCTTCTCCAATGCGTTGGGTGTGGTACGCAGCCCCTTCGAGTACCTACAGTACTACCTGGCTGAGCCATG	1	1e-05	0
GAATGGCACAGAAGGCCCTAACTTCTACGTGCCCTTCTCCAATGCGACGGGTGTGGTACGCAGCCCCTTCGAGTACCCACAGTACTACCTGGCTGCGCCATG	1	1e-05	0
CAATGGCACAGAAGGCCCTAAATTCTACGTGCCCTTCTCCAATGCGACGGGTGTGGTACGCAGCCCCTTCGAGTACCCACAGTACTACCTGGCTGAGCCATG	1	1e-05	0
GAATGGCACAGAAGGCCCTAACTTCTACGTGCCCTCCTCCAATGCGATGGGTGTGGTACGCAGCCCCTTCGAGTACCCACAGTACTACCTGGCTGAGCCATG	1	1e-05	43GG
GAATGGCACAGAAGGCCCTAACTTCTACGTGCCCTTCTCCAATGCGTTGGGCGTGGTACGCAGCCCCTTCGAGTACCCACAGTACTACCTGGCTGAGCAATG	1	1e-05	0
GAATGGCACAGAAGGCCCTAACTTCTACGTGCCCTTCTCCAATG-GATGGGTGTGGTACGCAGCCCCTTCGAGTACCCACAGTACTACCTGCCTGAGCCATG	1	1e-05	0
GAATGGCACAGAAGGCCCTAACTTCTACGTGCCCTTCTCCAATG--ATGGGTGTGGTACGCAGCCCCTTCGAGTACCCACAGTACTACCTGACTGAGCCATG	1	1e-05	43A
GAATGGCACAGAAGGCCCTAACTTCTACGTGCCCTTCTCCAATGCGACGGGTGTGGTACGCAGCCCCTTCGAGTACCCACAATACTACCTGGCTGAGCCATG	1	1e-05	0
#NAME?	1	1e-05	0
GAATGGCACAGAAGGCCCTAACTTCT-CG-GCC--TCTCCA--GCGATGGGTGTGGTACGCAGCCCCTTCGAGTACCCACAGTACTACCTGGCTGAGCCATG	1	1e-05	33AG36GAG40GAG44G47CGCGC
GAATGGCACAGAAGGCCCTAACTCCTACGTGCCCTTCTCCAATGCGATGGGTGTGGTACGCAGCCCCTTCAAGTACCCACAGTACTACCTGGCTGAGCGA-G	1	1e-05	0
GAATGGCACAGAAGACCCTAACTTCTACGTGCCCTTCTCCAATGCGACGGGTGTGGTACGCAGCCCCTTCGAGTACCCACAGTACTACCTGGCTGAGCCATG	1	1e-05	0
GCATGGCACAGAAGGCCCTAACTTCTACATGCCCTTCTCCAATGCGATGGGCGTGGTACGCAGCCCCTTCGAGTACCCACAGTACTACCTGGCTGAGCCATG	1	1e-05	0
GAATGGCACATAAGGCCCTAACTTCTACGTGCCCTTCTCCAATG-GATGGGTGTGGTACGCAGCCCCTTCGAGTACCCACAGTACTACCTGGCTGAGCCATG	1	1e-05	0
GAGTGGCACAGAAGGCCCTAACTTCTACGTGCCCTTCTCCAATG---TGGGTGTGGTACGCAGCCCCTTCGAGTACCCACAGTACTACCTGGCTGAGCCATG	1	1e-05	0
GAATGGCACAGAAGGCCCTAACTTCTGCGTGCCCTTCTCCAATGCGATGGGTGTGGTACGCAGCCCCTTCGAGTACCCACAGTACTACCTGGCTGAGCCATG	1	1e-05	43G
GAGTGGCACAGAAGGCCCTAACTTCTACGTGCCCTTCTCCAATGCGATGGGTGTGGTACGCAGCCCCTTCGAGTACCCACAGTACTACCTGGCTGAGCCATG	1	1e-05	43G
GAATGGCACAGAAGGCCCTAACTTCTACGTGCCCTTCTCCAATG-GATGGGTGTGGTACGTAGCCCCTTCGAGTACCCACAGTACTACCTGGCTGAGCCATG	1	1e-05	0
GAATGGCACAGAAGGCCCTAACTTCTACGTGCCCTTCTCCAAT--GATGGGTGTGGTACGCGGCCCCTTCGAGTACCCACAGTACTACCTGGCTGAGCCATG	1	1e-05	0
GAATGGCACAGAAGGCCCTAACTTCTACGTGCCCTTCTCCAATGCGATGGGTGTGGTACGCAGCCCCTTCGAGTACCCACAGTACTACCTGGCT--GCCATG	1	1e-05	95TT
GAATGGCACAGACGGCCCTAACTTCTACGTTCCCTTCTCCAATGCGATGGGTGTGGTACGCAGCCCCTTCGAGTACCCACAGTACTACCTGGATGAGCCATG	1	1e-05	0
GAACGGCACAGAGGGCCC-AA-TT-TATGTGCCCTTCTCCAA--CGA--GGCGTGGT--GCAGCCCCTTCGAG--CCCGCAGTACTACCTGGC-GA-CCATG	1	1e-05	16A22TT44TCAC59GG74AG94GA
GAATGGCACAGAAGGCCCTAACTTCTACGTGCCCTTCTCCAATGCGACGGGTGTGGTACGCAGCCCCTTCGAGTACCCACAGTACTACCTGGATGAGCCATG	1	1e-05	0
GAATGGCACAAAAGGCCCTAACTTCTACGTGCCCTTCTCCA---------------TACGCAGCCCCTTCGAGTACCCACAGTACTACCTGGCTGAGCCATG	1	1e-05	0
GAATGGCACAGAAGGCCCTAACTTCTACGAGCCCTTCTCCAATGCGATGGGTGTGGTACGCAGCCCCTTCGAGTACCCACAGTACTTCCTGGCTGAGCCATG	1	1e-05	0
GAATGGCACAGAAGGCCCTAACTTCTACGTGCCCTTCTCCAATGCGATGGGTGTGGGACGCAGCCCCTTCGAGTACCCACAGTACTACCTGGCTGAGCCATG	1	1e-05	43G
GAATGGCACAGAAGGCCCTACCTTCTACGTGCCCTTCTCCA---CGATGGGTGTGGTACGCAGCCCCTTCGAGTACCCACAGTACTACCTGGCTGAGCCATG	1	1e-05	0
GAATGGCACAGAAGGCCCTAACTTCTACGTGCCCTTCTCCAAT-CGATGGGTGTGGTACTCAGCCCCTTCGAGTACCCACAGTACTACCTGGCTGAGCCATG	1	1e-05	0
GAATGGCACAGAAGGCCCTAACTTCTACGTGCCCTTCTCCAATGCGATGGGTGTGGTACGCAGCCCCTTCGAGTACCCACAGTACTACTTGGCTGAGCCATG	1	1e-05	43GC
GAATGGCACAGAAGGCCCTAACTTCTACGTGCCCTTCTCCAATGAGATGGGTGTGGTACGCAGCCCCTTCGAGTACCCACAGTACTACCTGGCTGAGTCATG	1	1e-05	0
GAACGGCACAG-AGGCCC-AA-TT-TATGTGCCCTTCTCCAA--CGA--GGCGTGGT--GCAGCCCCTTCGAG--CCCGCAGTACTACCTGGC-GA-CCATG	1	1e-05	14GC22TT44TCAC59GA74AG94GA
GAATGGCACAGAAGGCCCTAACTTCTACGTGCCCTTCCCCA---CGATGGGTGTGGTACGCAGCCCCTTCGAGTACCCACAGTACTACCTGGCTGAGCGATG	1	1e-05	0
GAATGGCACAGAAGGCCCTAACTTCTACGTGCC-----CC---GCGATGGGTGTGGTACGCAGCCCCTTCGAGTACCCACAGTACTACCTGGCTGAGCCATG	1	1e-05	0
[truncated: 470 more rows]
