# Supplementary material for: Allele-specific gene-editing approach for vision loss restoration in RHO-associated retinitis pigmentosa
Source: eLife journal article supplement (doi:10.7554/elife.84065), 2023-06-05
Supplement: data3 [file Figure 5CSource Data 2.xlsx]

## Sheet: Figure 5D–Source Data2
mapping_regon	Reads num	Proportion	Insert_info
GAATGGCACAGAAGGCCCTAACTTCTACGTGCCCTTCTCCAATGCGATGGGTGTGGTACGCAGCCCCTTCGAGTACCCACAGTACTACCTGGCTGAGCCATG	85375	0.73356	0
GAATGGCACAGAAGGCCCTAACTTCTACGTGCCCTTCTCCAATGCGACGGGTGTGGTACGCAGCCCCTTCGAGTACCCACAGTACTACCTGGCTGAGCCATG	5432	0.04667	0
GAATGGCACAGAAGGCCCTAACTTCTACGTGCCCTTCTCCAAT-CGATGGGTGTGGTACGCAGCCCCTTCGAGTACCCACAGTACTACCTGGCTGAGCCATG	3781	0.03249	0
GAACGGCACAG-AGGCCC-AA-TT-TATGTGCCCTTCTCCAA--CGA--GGCGTGGT--GCAGCCCCTTCGAG--CCCGCAGTACTACCTGGC-GA-CCATG	2365	0.02032	14GC22TT44TCAC59GG74AG94GA
GAATGGCACAGAAGGCCCTAACTTCTACGTGCCCTTCTCCAATG-GATGGGTGTGGTACGCAGCCCCTTCGAGTACCCACAGTACTACCTGGCTGAGCCATG	1690	0.01452	0
GAATGGCACAGAAGGCCCTAACTTCTACGTGCCCTTCTCCAAT--GATGGGTGTGGTACGCAGCCCCTTCGAGTACCCACAGTACTACCTGGCTGAGCCATG	1542	0.01325	0
GAATGGCACAGAAGGCCCTAACTTCTACGTGCCCTTCTCCAA--CGATGGGTGTGGTACGCAGCCCCTTCGAGTACCCACAGTACTACCTGGCTGAGCCATG	1467	0.0126	0
GAATGGCACAGAAGGCCCTAACTTCTACGTGCCCTTCTCCAATGCGATGGGTGTGGTACGCAGCCCCTTCGAGTACCCACAGTACTACCTGGCTGAGCCATG	1248	0.01072	43G
GAATGGCACAGAAGGCCCTAACTTCTACGTGCCCTTCTCCAATGCGATGGGTGTGGTACGCAGCCCCTTCGAGTACCCACAGTACTACCTGGCTGAGCCATG	579	0.00497	44C
GAATGGCACAGAAGGCCCTAACTTCTACGTGCCCTTCTCCAATG---TGGGTGTGGTACGCAGCCCCTTCGAGTACCCACAGTACTACCTGGCTGAGCCATG	314	0.0027	0
GAATGGCACAGAAGGCCCTAACTTCTACGTGCCCTTCTCCAATGCGATGGGTGTGGTACGCAGCCCCTTCGAGTACCCACAGTACTACCTGGCTGAGCCATG	311	0.00267	44T
GAATGGCACAGAAGGCCCTAACTTCTACGTGCCCTTCTCCA---CGATGGGTGTGGTACGCAGCCCCTTCGAGTACCCACAGTACTACCTGGCTGAGCCATG	294	0.00253	0
GAATGGCACAGAAGGCCCTAACTTCTACGTGCCCTTCTCCA-----ATGGGTGTGGTACGCAGCCCCTTCGAGTACCCACAGTACTACCTGGCTGAGCCATG	228	0.00196	0
GAATGGCACAGAAGGCCCTAACTTCTACGTGCCCTTCTCCAATGGGATGGGTGTGGTACGCAGCCCCTTCGAGTACCCACAGTACTACCTGGCTGAGCCATG	225	0.00193	0
GAATGGCACAGAAGGCCCTAACTTCTACGTGCCCTTCTCCAATGCGATGGGTGTGGTACGCAGCCCCTTCGAGTACCCACAGTACTACCTGGCTGAGCCATG	206	0.00177	44A
GAATGGCACAGAAGGCCCTAACTTCTACGTGCCCTT--------CGATGGGTGTGGTACGCAGCCCCTTCGAGTACCCACAGTACTACCTGGCTGAGCCATG	173	0.00149	0
GAATGGCACAGAAGGCCCTAACTTCTACGTGCCCTTCTCC----CGATGGGTGTGGTACGCAGCCCCTTCGAGTACCCACAGTACTACCTGGCTGAGCCATG	165	0.00142	0
GAATGGCACAGAAGGCCCTAACTTCTACGTGCCCTTCTCCAAT------GGTGTGGTACGCAGCCCCTTCGAGTACCCACAGTACTACCTGGCTGAGCCATG	136	0.00117	0
GAATGGCACAGAAGGCCCTAACTTCTACGTGCCCTTCTCCAA-GCGATGGGTGTGGTACGCAGCCCCTTCGAGTACCCACAGTACTACCTGGCTGAGCCATG	132	0.00113	0
GAATGGCACAGAAGGCCCTAACTTCTACGTGCCCTTCTCCAATGCGATGGGTGTGGTACGCAGCCCCTTCGAGTACCCACAGTACTACCTGGCTGGGCCATG	129	0.00111	0
GAATGGCACAGAAGGCCCTAACTTCTACGTGCCCTTC-------CGATGGGTGTGGTACGCAGCCCCTTCGAGTACCCACAGTACTACCTGGCTGAGCCATG	129	0.00111	0
GAATGGCACAGAAGGCCCTAACTTCTACGTGCCCTTCTCCAATG----GGGTGTGGTACGCAGCCCCTTCGAGTACCCACAGTACTACCTGGCTGAGCCATG	117	0.00101	0
GAATGGCACAGAAGGCCCTAACTTCTACGTGCCCTTCT------CGATGGGTGTGGTACGCAGCCCCTTCGAGTACCCACAGTACTACCTGGCTGAGCCATG	88	0.00076	0
GAATGGCACAGAAGGCCCTAACTTCTACGTGCCCTTCTCCAATGCGATGGGCGTGGTACGCAGCCCCTTCGAGTACCCACAGTACTACCTGGCTGAGCCATG	87	0.00075	0
GAATGACACAGAAGGCCCTAACTTCTACGTGCCCTTCTCCAATGCGATGGGTGTGGTACGCAGCCCCTTCGAGTACCCACAGTACTACCTGGCTGAGCCATG	87	0.00075	0
GAATGGCACAGAAGGCCCTAACTTCTACGTGCCCTTCTCCAATGCGATGGGTGTGGTACGCAGCCCCTTCGAGTACCCACAGTACTACCTGGCTGAGCCATG	86	0.00074	41ATGCG
GAATGGCACAGAAGGCCCTAACTTCTACGTGCCCTTCTCCAATGCGATGGGTGTGGTACACAGCCCCTTCGAGTACCCACAGTACTACCTGGCTGAGCCATG	83	0.00071	0
GAATGGCACAGAAGGCCCTAACTTCTACGTGCCCTTCTCCAATGCGATGGGTGTGGTACGCAGTCCCTTCGAGTACCCACAGTACTACCTGGCTGAGCCATG	79	0.00068	0
GAATGGCACAGAAGGCCCTAACTTCTACGTGCCCTTCTC-----CGATGGGTGTGGTACGCAGCCCCTTCGAGTACCCACAGTACTACCTGGCTGAGCCATG	78	0.00067	0
GAATGGCACAGAAGGCCCTAACTTCTACGTGCCCTTCTCCAATGTGATGGGTGTGGTACGCAGCCCCTTCGAGTACCCACAGTACTACCTGGCTGAGCCATG	78	0.00067	0
GAATGGCACAGAAGGCCCTAACTTCTACGTGCCCTTCTCCAATGCGATGGGTGTGGTACGCAGCCCCTTCGAGTACCCACAGTACTACCTGGCTGAGCCATG	74	0.00064	43GC
GAATGGCACAGAAGGCCCTAACTTCTACGTGCCCTTCTCCAATGCGATGGGTGTGGTACGCAGCCCCTTCGAGTACCCACAGTACTACCTGGCTGAGTCATG	72	0.00062	0
GAATGGCACAGAAGGCCCTAACTTCTACGTGCCCTTCTCCAATGCGATGGGTGTGGCACGCAGCCCCTTCGAGTACCCACAGTACTACCTGGCTGAGCCATG	72	0.00062	0
GAATGGCACAGAAGGCCCTAACTTCTACGCGCCCTTCTCCAATGCGATGGGTGTGGTACGCAGCCCCTTCGAGTACCCACAGTACTACCTGGCTGAGCCATG	70	0.0006	0
GAATGGCACAGAAGGCCCTAACTTCTACGTGCCCTTCTCCAAT-------GTGTGGTACGCAGCCCCTTCGAGTACCCACAGTACTACCTGGCTGAGCCATG	70	0.0006	0
GAATGGCACAGAAGGCCCTAACTTCTACGTGCCCTTCTCCAA-----------TGGTACGCAGCCCCTTCGAGTACCCACAGTACTACCTGGCTGAGCCATG	69	0.00059	0
GAATGGCACAGAAGGCCCTAACTTCTACATGCCCTTCTCCAATGCGATGGGTGTGGTACGCAGCCCCTTCGAGTACCCACAGTACTACCTGGCTGAGCCATG	67	0.00058	0
GAATGGCACAGAAGGCCCTAACTTCTACGTGCCCTTCTCCAATGCGATGGGTGTGGTACGCAGCCCCTTCGAGTACCCACGGTACTACCTGGCTGAGCCATG	63	0.00054	0
GAATGGCACAGAAGGCCCTAACTTCTATGTGCCCTTCTCCAATGCGATGGGTGTGGTACGCAGCCCCTTCGAGTACCCACAGTACTACCTGGCTGAGCCATG	60	0.00052	0
GAATGGCACAGAAGGCCCTAACTTCTACGTGCCCTTCTCCAATGCGATGGGTGTGGTATGCAGCCCCTTCGAGTACCCACAGTACTACCTGGCTGAGCCATG	58	0.0005	0
GAATGGCACAGAAGGCCCTAACTTCTACGTGCCCTTCTCCAATGCGATGGGTGTGGTACGCACCCCCTTCGAGTACCCACAGTACTACCTGGCTGAGCCATG	57	0.00049	0
GAATGGTACAGAAGGCCCTAACTTCTACGTGCCCTTCTCCAATGCGATGGGTGTGGTACGCAGCCCCTTCGAGTACCCACAGTACTACCTGGCTGAGCCATG	57	0.00049	0
GAATGGCACAGAAGGCCCTAACTTCTACGTGCCCTTCTCCAATGCGATGGGTATGGTACGCAGCCCCTTCGAGTACCCACAGTACTACCTGGCTGAGCCATG	56	0.00048	0
GAATGGCACAGAAGGCCCTAACTTCTACGTGCCCTTCTCCAATGCGATGGGTGTGGTACGCAGCCCCTTCGAGTACCCACAGTACTACCTGGTTGAGCCATG	54	0.00046	0
GAATGGCACAGAAGGCCCTAACTTCTACGTACCCTTCTCCAATGCGATGGGTGTGGTACGCAGCCCCTTCGAGTACCCACAGTACTACCTGGCTGAGCCATG	53	0.00046	0
GAATGGCACAGAAGGCCCTAACTTCTACGTGTCCTTCTCCAATGCGATGGGTGTGGTACGCAGCCCCTTCGAGTACCCACAGTACTACCTGGCTGAGCCATG	53	0.00046	0
GAATGGCACAGAAGGCCCTAACTTCTACGTGCCCTTCTCCAATGCGATGGGTGTGGTACGCAGCCCCTTCGAGTACCCACAGTACTACCTGACTGAGCCATG	52	0.00045	0
GAATGGCACAGAAGGCCCTAACTTCTACGTGCCCTTCTCCAATGCAATGGGTGTGGTACGCAGCCCCTTCGAGTACCCACAGTACTACCTGGCTGAGCCATG	51	0.00044	0
GAATGGCACAGAAGGCCCTAACTTCTACGTGCCCTTCTCCAA---------TGTGGTACGCAGCCCCTTCGAGTACCCACAGTACTACCTGGCTGAGCCATG	51	0.00044	0
GAATGGCACAGAAGGCCCTAACTTCTACGTGCCCTTCTCCAATGCGATGGGTGTGGTACGCAACCCCTTCGAGTACCCACAGTACTACCTGGCTGAGCCATG	50	0.00043	0
GAATGGCACAGAAGGCCCTAACTTCTACGTGCCCTTCTCCAATGCGATGGGTGTGGTACGCAGCCCCTTTGAGTACCCACAGTACTACCTGGCTGAGCCATG	49	0.00042	0
GAATGGCACAGAAGGCCCTAACTTCTACGTGCCCTTCTCCAATGCGATGGGTGTGGTACGCAGCCCCTTCGAGTACCCACAGTACCACCTGGCTGAGCCATG	48	0.00041	0
GAATGGCACAGAAGGCCCTAACTTCTACGTGCCCTTCTCCAATGCGATGGGTGTGGTACGCAGCCCCTTCGAGTACCCACAGTACTACCTGGCTGAACCATG	48	0.00041	0
GAATGGCACAGAAGGCCCTAACTTCTACGTGCCCTTCTCCAATGCGATGGGTGTGGTACGTAGCCCCTTCGAGTACCCACAGTACTACCTGGCTGAGCCATG	46	0.0004	0
GAATGGCACAGAAGGCCCTAACTTCTACGTGCCCTTCTCCAATGCGATGGGTGTGGTACGCAGCCCCTTCGAGTACCCACAGTACTACCTGGCCGAGCCATG	46	0.0004	0
GAATGGCACAGAAGGCCCTAACTTCTACGTGCCCTTCTCCAATGCGATGGGTGCGGTACGCAGCCCCTTCGAGTACCCACAGTACTACCTGGCTGAGCCATG	45	0.00039	0
GAATGGCACAGAAGGCCCTAACTTCTACGTGCCCTTCTCCAATGCGATGGGTGTGGTACGCAGCCCCTTCGGGTACCCACAGTACTACCTGGCTGAGCCATG	44	0.00038	0
GAATGGCACAGAAGGCCCTAACTTCTACGTGCCCTTCTCCAATGAGATGGGTGTGGTACGCAGCCCCTTCGAGTACCCACAGTACTACCTGGCTGAGCCATG	43	0.00037	0
GAATGGCACAGAAGGCCCTAACTTCTACGTGCCCTTCTCCAATGCGATGGGTGTGGTACGCAGCCCCTTCGAGTACCCACAGTACTACCTGGCTGAGCCATG	43	0.00037	43GCGATG
GAATGGCATAGAAGGCCCTAACTTCTACGTGCCCTTCTCCAATGCGATGGGTGTGGTACGCAGCCCCTTCGAGTACCCACAGTACTACCTGGCTGAGCCATG	42	0.00036	0
GAATGGCACAGAAGGCCCTAACTTCTACGTGCCCTTCTCCAATGCGATGGGTGTGGTACGCGGCCCCTTCGAGTACCCACAGTACTACCTGGCTGAGCCATG	41	0.00035	0
GAATGGCACAGAAGGCCCTAACTTCTACGTGCCCTTCTCCAATGC-ATGGGTGTGGTACGCAGCCCCTTCGAGTACCCACAGTACTACCTGGCTGAGCCATG	41	0.00035	0
GAATGGCACAGAAGGCCCTAACTTCTACGTGCCCTTCCCCAATGCGATGGGTGTGGTACGCAGCCCCTTCGAGTACCCACAGTACTACCTGGCTGAGCCATG	41	0.00035	0
GAATGGCACAGAAGGTCCTAACTTCTACGTGCCCTTCTCCAATGCGATGGGTGTGGTACGCAGCCCCTTCGAGTACCCACAGTACTACCTGGCTGAGCCATG	40	0.00034	0
GAATGGCACAGAAGGCCCTAACTTCTACGTGCCCTCCTCCAATGCGATGGGTGTGGTACGCAGCCCCTTCGAGTACCCACAGTACTACCTGGCTGAGCCATG	40	0.00034	0
GAATGGCACAGAAGGCCCTAACTTCTACGTGCCCTTCTCCAATGCGATGGGTGTGGTACGCAGCCCCTTCAAGTACCCACAGTACTACCTGGCTGAGCCATG	39	0.00034	0
GAACGGCACAGAAGGCCCTAACTTCTACGTGCCCTTCTCCAATGCGATGGGTGTGGTACGCAGCCCCTTCGAGTACCCACAGTACTACCTGGCTGAGCCATG	38	0.00033	0
GAATGGCACAGAAGGCCCTAACTTCTACGTGCCCTTCTCCAATGCGATGGGTGTGGTACGCAGCCCCTTCGAATACCCACAGTACTACCTGGCTGAGCCATG	37	0.00032	0
GAATGGCACAGAAGGCCCTAACTTCTACGTGCCCTTCTCCAATG--------GTGGTACGCAGCCCCTTCGAGTACCCACAGTACTACCTGGCTGAGCCATG	37	0.00032	0
GAATGGCACGGAAGGCCCTAACTTCTACGTGCCCTTCTCCAATGCGATGGGTGTGGTACGCAGCCCCTTCGAGTACCCACAGTACTACCTGGCTGAGCCATG	37	0.00032	0
GAATGGCACAGAAGGCCCTAACTTCTACGTGCCCTTCTCCGATGCGATGGGTGTGGTACGCAGCCCCTTCGAGTACCCACAGTACTACCTGGCTGAGCCATG	36	0.00031	0
GAATGGCACAGAAGGCCCTAACTTCTACGTGCCCTTCTCCAATGCGATGGATGTGGTACGCAGCCCCTTCGAGTACCCACAGTACTACCTGGCTGAGCCATG	36	0.00031	0
GAATGGCACAGAAGGCCCTAACTTCTACGTGCCCTTCTCCAATGCGATGGGTGTGGTACGCAGCCCCTTCGAGTACCCACAGTACTGCCTGGCTGAGCCATG	36	0.00031	0
GAATGGCACAGAAGGCCCTGACTTCTACGTGCCCTTCTCCAATGCGATGGGTGTGGTACGCAGCCCCTTCGAGTACCCACAGTACTACCTGGCTGAGCCATG	35	0.0003	0
GAATGGCACAGAAGGCCCTAACTTCTACGTGCCCTTCTCCAATGCGATGGGTGTGATACGCAGCCCCTTCGAGTACCCACAGTACTACCTGGCTGAGCCATG	35	0.0003	0
GAATGGCACAGAAGGCCCTAACTTCTACGTGCCCTTCTCCAATGCGATGGGTGTGGTACGCAGCCCCTTCGAGCACCCACAGTACTACCTGGCTGAGCCATG	35	0.0003	0
GAATGGCACAGAAGGCCCTAACTTCTACGTGCCCTTCTCCAATGCGATGGGTGTGGTACGCAGCCCCCTCGAGTACCCACAGTACTACCTGGCTGAGCCATG	34	0.00029	0
AAATGGCACAGAAGGCCCTAACTTCTACGTGCCCTTCTCCAATGCGATGGGTGTGGTACGCAGCCCCTTCGAGTACCCACAGTACTACCTGGCTGAGCCATG	34	0.00029	0
GAATGGCACAGAAGGCCCTAACTTCTACGTGCCCCTCTCCAATGCGATGGGTGTGGTACGCAGCCCCTTCGAGTACCCACAGTACTACCTGGCTGAGCCATG	34	0.00029	0
GAATGGCACAGAAGGCCCTAACTTCTACGTGCCCTTCTCCAATGCGATGGGTGTGGTACGCAGCCCCTTCGAGTACCCACAGTACTACCTGGCTGTGCCATG	33	0.00028	0
GAATGGCACAGAAGGCCCTAACTTCTACGTGCCCTTCTCCAATGCGATGGGTGTGGTACGCAGCCCCTTCGAGTACCCACAGTATTACCTGGCTGAGCCATG	33	0.00028	0
GAATGGCACAGAGGGCCCTAACTTCTACGTGCCCTTCTCCAATGCGATGGGTGTGGTACGCAGCCCCTTCGAGTACCCACAGTACTACCTGGCTGAGCCATG	33	0.00028	0
GAATGGCACAGAAGGCCCTAACTTCTACGTGCCCTTCTCCAAT------------GTACGCAGCCCCTTCGAGTACCCACAGTACTACCTGGCTGAGCCATG	32	0.00027	0
GAATGGCACAGAAGGCCCTAACTTCTACGTGCCCTTCTCCAATGCGATGGGTGTGGTACGCAGCCCCTTCGAGTACCCACAGTACTACCTGGCTGAGCCATA	32	0.00027	0
GAATGGCACAGGAGGCCCTAACTTCTACGTGCCCTTCTCCAATGCGATGGGTGTGGTACGCAGCCCCTTCGAGTACCCACAGTACTACCTGGCTGAGCCATG	32	0.00027	0
GAATGGCACAGAAGGCCCCAACTTCTACGTGCCCTTCTCCAATGCGATGGGTGTGGTACGCAGCCCCTTCGAGTACCCACAGTACTACCTGGCTGAGCCATG	32	0.00027	0
GAATGGCACAGACGGCCCTAACTTCTACGTGCCCTTCTCCAATGCGATGGGTGTGGTACGCAGCCCCTTCGAGTACCCACAGTACTACCTGGCTGAGCCATG	32	0.00027	0
GAATGGCACAGAATGCCCTAACTTCTACGTGCCCTTCTCCAATGCGATGGGTGTGGTACGCAGCCCCTTCGAGTACCCACAGTACTACCTGGCTGAGCCATG	32	0.00027	0
GAATGGCACAGAAGGCCCTAACTTCTACGTGCCCTTCTCCAA---GATGGGTGTGGTACGCAGCCCCTTCGAGTACCCACAGTACTACCTGGCTGAGCCATG	31	0.00027	0
GGATGGCACAGAAGGCCCTAACTTCTACGTGCCCTTCTCCAATGCGATGGGTGTGGTACGCAGCCCCTTCGAGTACCCACAGTACTACCTGGCTGAGCCATG	31	0.00027	0
GAATGGCACAGAAGGCCCTAACTTCTACGTGCCCTTCTCCAATGCGATGGGTGTGGTACGCAGCCCCTTCGAGTACCCACAGTACTACCTGGCTGAGCCACG	31	0.00027	0
GAATGGCACAGAAGGCCCTAACTTCTACGTGCCCTTCTCCAATACGATGGGTGTGGTACGCAGCCCCTTCGAGTACCCACAGTACTACCTGGCTGAGCCATG	31	0.00027	0
GAATGGCACAGAAGACCCTAACTTCTACGTGCCCTTCTCCAATGCGATGGGTGTGGTACGCAGCCCCTTCGAGTACCCACAGTACTACCTGGCTGAGCCATG	31	0.00027	0
GAATGGCACAGAAGGCCCCAA-TT-TATGTGCCCTTCTCCAA--CGA--GGCGTGGT--GCAGCCCCTTCGAG--CCCGCAGTACTACCTGGC-GA-CCATG	30	0.00026	22TT44TCAC59GG74AG94GA
GAATGGCACAAAAGGCCCTAACTTCTACGTGCCCTTCTCCAATGCGATGGGTGTGGTACGCAGCCCCTTCGAGTACCCACAGTACTACCTGGCTGAGCCATG	30	0.00026	0
GAATGGCACAGAAGGCCCTAACTTCTACGTGCCATTCTCCAATGCGATGGGTGTGGTACGCAGCCCCTTCGAGTACCCACAGTACTACCTGGCTGAGCCATG	30	0.00026	0
GAATGGCACAGAAGGCCATAACTTCTACGTGCCCTTCTCCAATGCGATGGGTGTGGTACGCAGCCCCTTCGAGTACCCACAGTACTACCTGGCTGAGCCATG	30	0.00026	0
GAATGGCACAGAAGGCCCTAACTTCTACGTGCCCTTCTCCAATGCGATGGGTGTGGTACGCAGCCCCTCCGAGTACCCACAGTACTACCTGGCTGAGCCATG	29	0.00025	0
GAATGGCACAGAAGGCCCTAACTTCTACGTGCCCTTCTCCAATTCGATGGGTGTGGTACGCAGCCCCTTCGAGTACCCACAGTACTACCTGGCTGAGCCATG	28	0.00024	0
GAATAGCACAGAAGGCCCTAACTTCTACGTGCCCTTCTCCAATGCGATGGGTGTGGTACGCAGCCCCTTCGAGTACCCACAGTACTACCTGGCTGAGCCATG	28	0.00024	0
GAATGGCACAGAAGGCCCTAACTTCTACGTGCCCTTCTCCAATGCGATGGGTGTGGTACGCAGCCCCTTCGAGTACCCACAGTACTACCTGGCTGAGCCATG	27	0.00023	45GATG
GAATGGCACAGAAGGCCCTAACTTCTACGTGCCCTTCTCCAATGCGATGGGTGTGGTACGCAGCCCCTTCGAGTACCCATAGTACTACCTGGCTGAGCCATG	26	0.00022	0
GAATGGCACAGAAGGCCCTAACTTCTACGTGCCCTTCTCCAATGCGATGGGAGTGGTACGCAGCCCCTTCGAGTACCCACAGTACTACCTGGCTGAGCCATG	26	0.00022	0
GAATGGCACAGAAGGCCCTAACTTCTACGTGCCCTTCTCCAATGCGATGGGTGTGGTACGCAGCCCCTTCGAGTACCCACAGTACTACCTGGCTGAGCCATG	26	0.00022	42TG
GAATGGCACAGAAGGCCCTAACTTCTACGTGCCCTTCTCCAATGCTATGGGTGTGGTACGCAGCCCCTTCGAGTACCCACAGTACTACCTGGCTGAGCCATG	26	0.00022	0
GAATGGCACAGAAGGCCCTAACTTCTACGTGCCCTTCTCCAACGCGATGGGTGTGGTACGCAGCCCCTTCGAGTACCCACAGTACTACCTGGCTGAGCCATG	25	0.00021	0
GCATGGCACAGAAGGCCCTAACTTCTACGTGCCCTTCTCCAATGCGATGGGTGTGGTACGCAGCCCCTTCGAGTACCCACAGTACTACCTGGCTGAGCCATG	25	0.00021	0
GAATGGCACAGAAGGCCCTAACTTCTACGTGCCCT---------CGATGGGTGTGGTACGCAGCCCCTTCGAGTACCCACAGTACTACCTGGCTGAGCCATG	25	0.00021	0
GAATGGCACATAAGGCCCTAACTTCTACGTGCCCTTCTCCAATGCGATGGGTGTGGTACGCAGCCCCTTCGAGTACCCACAGTACTACCTGGCTGAGCCATG	24	0.00021	0
GAATGGCACAGAAGGCCCTAACTTCTACGTGCCCTTCTCCAATGCGATGGGTGTGGTACGCAGCCCCTTCGAGTACCCACAGTACTACCTGGCTGAGCTATG	24	0.00021	0
GAATGGCACAGAAGGCCCTAACTTCTACGTGCCCTTCTCCAATGCGATGGGTGTGGTACGCAGCCCCTTCGAGTACCCACAGTACTACCTGGCTGAGCCGTG	24	0.00021	0
GAATGGCGCAGAAGGCCCTAACTTCTACGTGCCCTTCTCCAATGCGATGGGTGTGGTACGCAGCCCCTTCGAGTACCCACAGTACTACCTGGCTGAGCCATG	24	0.00021	0
GAGTGGCACAGAAGGCCCTAACTTCTACGTGCCCTTCTCCAATGCGATGGGTGTGGTACGCAGCCCCTTCGAGTACCCACAGTACTACCTGGCTGAGCCATG	23	0.0002	0
GAATGGCACAGAAGGCCCTAACTTCTACGTGCCCTTCTCCAATGCGATGGGTGTGGTACGCAGCCCCTTCGAGTACCCACAGTACTACCTGGCTAAGCCATG	23	0.0002	0
GAATGGCACAGAAGGCCCTAACTTCTACGTGCCCTTCTCCAGTGCGATGGGTGTGGTACGCAGCCCCTTCGAGTACCCACAGTACTACCTGGCTGAGCCATG	23	0.0002	0
GAATGGCACAGAAGGCCCTAACTTCTACGTGCCCTTCTCCAATGCGATGGGTGTGGTACGCATCCCCTTCGAGTACCCACAGTACTACCTGGCTGAGCCATG	23	0.0002	0
GAATGGCACAGAAGGCCCTAACTTCTACGTGCCCTTCTCCAATGCGATGGGTGTGGTACGCAGCCCCTTCGAGTACCCACAGTACTACCTGGCTGAGCCTTG	23	0.0002	0
GAATGGCACAGAAGGCCCTAACTTCTACGTGCCCTTCTCCAATGCGATGGGTGTGGTACGCAGCCCCTTCGAGTACCCACAGTACTACCTGGCTGAGCCATG	23	0.0002	47TGG
GAATGGCACAG-AGGCCC-AA-TT-TATGTGCCCTTCTCCAA--CGA--GGCGTGGT--GCAGCCCCTTCGAG--CCCGCAGTACTACCTGGC-GA-CCATG	23	0.0002	14GC22TT44TCAC59GG74AG94GA
GAATGGCACAGAAGGCCCTAACTTCTACGTGCCCTTCTACAATGCGATGGGTGTGGTACGCAGCCCCTTCGAGTACCCACAGTACTACCTGGCTGAGCCATG	22	0.00019	0
GAATGGCACAGAAGGCCCTAACTTCTACGTGCCCTTCTCTAATGCGATGGGTGTGGTACGCAGCCCCTTCGAGTACCCACAGTACTACCTGGCTGAGCCATG	22	0.00019	0
GAATGGCACAGAAGGCCCTAACTTCTACGTGCCCTTCTCCAATGCGATGGGTGTGGTACGCAGCCCCTTCGAGTACCCACAGTACTACCTAGCTGAGCCATG	22	0.00019	0
GAATGGCACAGAAGGCCCTAACTTCTACGTGCCCTTCTCCAATG-G-TGGGTGTGGTACGCAGCCCCTTCGAGTACCCACAGTACTACCTGGCTGAGCCATG	22	0.00019	0
GAATGGCACAGAAGGCCCTAACTTCCACGTGCCCTTCTCCAATGCGATGGGTGTGGTACGCAGCCCCTTCGAGTACCCACAGTACTACCTGGCTGAGCCATG	22	0.00019	0
GAATGGCACAGAAGGCCCTAACTTCTACGTGCCCTTCTCCAATGCGATGGGTGTGGTACGCAGCCCCTTCGAGTACCCACAGCACTACCTGGCTGAGCCATG	22	0.00019	0
GAATGGCACAGAAGGCCCTAACTTCTACGTGCCCTTCTCCAA--CGATGGGTGTGGTACGCAGCCCCTTCGAGTACCCACAGTACTACCTGGCTGAGCCATG	22	0.00019	40A
GAATGGCACAGAAGGCCCTAACTTCTACGTGCCCTTCTCCAATGCGATGGGTGTGGTACGCAGCCCCTTCGAGTACCCACAGTACTACCTGGCTGAGCCATG	21	0.00018	45GATGG
GAATGGCACAGAAGGCCCTAACTTCTACGTGCCCTTCTCCAATGCGATGGGTGTGGTACGCAGCCCCTTCGAGTATCCACAGTACTACCTGGCTGAGCCATG	21	0.00018	0
GAATGGCACAGAAGGCCCTAACTTCTACGTGCCCTTCTCCAATGCGATGGGTGTGGTACGCAGCCCATTCGAGTACCCACAGTACTACCTGGCTGAGCCATG	21	0.00018	0
GAATGGCACAGAAGGCCCTAACTTCTACGTGCCCTTCTCCAATGCGATGGGTGTGGTACGCAGCCCCTTCGAGTACCCACAGTACTACCTGTCTGAGCCATG	21	0.00018	0
GAATGGCACAGAAGGCCCTAACTTCTACGTGCCCTTCTCCAATGCGATAGGTGTGGTACGCAGCCCCTTCGAGTACCCACAGTACTACCTGGCTGAGCCATG	21	0.00018	0
GAATGGCACAGAAGGCCCTAACTTCTACGTGCCCTTCTCCAATGCGATGGGTGTGGTACGCAGCCCCTTCGAGTACCCACAGTACTACCTGGCTGAGCCATG	21	0.00018	43GA
GACTGGCACAGAAGGCCCTAACTTCTACGTGCCCTTCTCCAATGCGATGGGTGTGGTACGCAGCCCCTTCGAGTACCCACAGTACTACCTGGCTGAGCCATG	21	0.00018	0
GAATGGCACAGAAGGCCCTAACTTCTACGTGCCCTTCTCCAATGCGATGGGTGTGGTACGCAGCCCCATCGAGTACCCACAGTACTACCTGGCTGAGCCATG	20	0.00017	0
GAATGGCACAGAAGGCCCTAACTTCTACGTGCCCTTCTCCAATGCGATGGGTGTGGTACGCAGCCCCTTCGAGTACTCACAGTACTACCTGGCTGAGCCATG	20	0.00017	0
GAATGGCACAGAAGGCCCTAACTTCTACGTGCCCTTCTCCAATGCGATGGGTGTGGTACGCAGCCCCTTCGAGTACCCACAGTACTACCTGGCTGATCCATG	20	0.00017	0
GAATGGCACAGAAGGCCCTAACTTCTACGTGCCCTTCTCAAATGCGATGGGTGTGGTACGCAGCCCCTTCGAGTACCCACAGTACTACCTGGCTGAGCCATG	20	0.00017	0
GAATGGCACAGAAGGCCCTAACTCCTACGTGCCCTTCTCCAATGCGATGGGTGTGGTACGCAGCCCCTTCGAGTACCCACAGTACTACCTGGCTGAGCCATG	20	0.00017	0
GAATGGCACAGAAGGCCCTAACTTCTACGTGCCCTTCTCCAATGCGATGGGGGTGGTACGCAGCCCCTTCGAGTACCCACAGTACTACCTGGCTGAGCCATG	20	0.00017	0
GAATGGCACAGAAGGCCCTAACTTCTACGTGCCCTTCTCCAATGCGATGGGTGTGGTACGCAGCCCCTTCGAGTACCCACAGTACTACCCGGCTGAGCCATG	20	0.00017	0
GAATGGCACAGAAGGCCCTAACTTCTACGTGCCCTTCTCCAATGCGATGGGTGTGGTACGCAGCCCCTTCGAGTACACACAGTACTACCTGGCTGAGCCATG	19	0.00016	0
GAATGGCACAGAAGGCCCTAACTTCTACGTGCCCTTCTCCAATGCGATGGGTGTGGTACGCAGCCCCTTCGAGTACCCACAGTACTACCTGGC-GA-CCATG	19	0.00016	94GA
GAATGGCACAGAAGGCCCTAACCTCTACGTGCCCTTCTCCAATGCGATGGGTGTGGTACGCAGCCCCTTCGAGTACCCACAGTACTACCTGGCTGAGCCATG	19	0.00016	0
GAATGGCACAGAAGGCCCTAACTTCTACGTGCCCTTCTCCAATGCGAT-GGTGTGGTACGCAGCCCCTTCGAGTACCCACAGTACTACCTGGCTGAGCCATG	19	0.00016	47C
GAATGGCACAGAAGGCCCTAACTTCTACGTGCCCTTCTCCAATGCGGTGGGTGTGGTACGCAGCCCCTTCGAGTACCCACAGTACTACCTGGCTGAGCCATG	18	0.00015	0
#NAME?	18	0.00015	0
GAATGGCACAGAAGGCCCTAACTTCTACGTGCCCTTCTCCAATGCGATGGGTGTGGTACGCAGCCCCTTCGAGTACCCACAGTGCTACCTGGCTGAGCCATG	18	0.00015	0
GAATGGCACAGAAAGCCCTAACTTCTACGTGCCCTTCTCCAATGCGATGGGTGTGGTACGCAGCCCCTTCGAGTACCCACAGTACTACCTGGCTGAGCCATG	18	0.00015	0
GAATGGCACAGAAGGCACTAACTTCTACGTGCCCTTCTCCAATGCGATGGGTGTGGTACGCAGCCCCTTCGAGTACCCACAGTACTACCTGGCTGAGCCATG	18	0.00015	0
GAATGGCACAGAAGGCCCTAACTTCTACGTGCCCTTTTCCAATGCGATGGGTGTGGTACGCAGCCCCTTCGAGTACCCACAGTACTACCTGGCTGAGCCATG	18	0.00015	0
GAATGGCACAGAAGGCCCTAACTTCTACGAGCCCTTCTCCAATGCGATGGGTGTGGTACGCAGCCCCTTCGAGTACCCACAGTACTACCTGGCTGAGCCATG	17	0.00015	0
GAATGGCACAGAAGGCCCTAACTTCTACGTGCCCTTCTCCAATGCGATGGGTGTGGTACGCAGCCCCTTCGAGTACCCACAGTACTATCTGGCTGAGCCATG	17	0.00015	0
GAATGGCACAGAAGGCCCTAACTTCTACGTGCTCTTCTCCAATGCGATGGGTGTGGTACGCAGCCCCTTCGAGTACCCACAGTACTACCTGGCTGAGCCATG	17	0.00015	0
GAATGGCACAGAAGGCCCTAACTTCTACGTGCCCTTCTCCAATGCGATGGGTGTGGTACGCAGCCACTTCGAGTACCCACAGTACTACCTGGCTGAGCCATG	17	0.00015	0
GAATGGCACAGAAGGCCCTAACTTCTACGTGCCCTTCTCCA----GATGGGTGTGGTACGCAGCCCCTTCGAGTACCCACAGTACTACCTGGCTGAGCCATG	17	0.00015	0
GAATGGCACAGAAGGCCCTAACTTCTACGTGCCCTTCTCCAATGCGATGGGTGTGGTACGCAGCCCCTTCGAGTGCCCACAGTACTACCTGGCTGAGCCATG	17	0.00015	0
GAATGGCACAGAAGGCCCTAACTTCTACGTGCCCTTCTCCAATGCGATGGGTGTGGTACGCAGCCCCTTCGAGTACCCACAATACTACCTGGCTGAGCCATG	17	0.00015	0
GAATGGCACAGAAGGCCCTAACTTCTACGTGCCCTTCTCCAATGCGTTGGGTGTGGTACGCAGCCCCTTCGAGTACCCACAGTACTACCTGGCTGAGCCATG	17	0.00015	0
GAATGGCAAAGAAGGCCCTAACTTCTACGTGCCCTTCTCCAATGCGATGGGTGTGGTACGCAGCCCCTTCGAGTACCCACAGTACTACCTGGCTGAGCCATG	17	0.00015	0
GAATGGCACAGAAGGCCCTAACTTCTACGTGCACTTCTCCAATGCGATGGGTGTGGTACGCAGCCCCTTCGAGTACCCACAGTACTACCTGGCTGAGCCATG	17	0.00015	0
GAATGGCACAGAAGGCCCTAACTTCTACGTGCCCTTCTCCACTGCGATGGGTGTGGTACGCAGCCCCTTCGAGTACCCACAGTACTACCTGGCTGAGCCATG	17	0.00015	0
GAATGGCACAGAAGGCTCTAACTTCTACGTGCCCTTCTCCAATGCGATGGGTGTGGTACGCAGCCCCTTCGAGTACCCACAGTACTACCTGGCTGAGCCATG	17	0.00015	0
GAATGGCACAGAAGGCCCTAACTTCTACGTGCCCTTCTCCAATGCGATGGGTGTGGTACGCAGCCCCTTCGAGTACCTACAGTACTACCTGGCTGAGCCATG	17	0.00015	0
GAATGGCACAGAAGGCCCTAACTTCTGCGTGCCCTTCTCCAATGCGATGGGTGTGGTACGCAGCCCCTTCGAGTACCCACAGTACTACCTGGCTGAGCCATG	17	0.00015	0
GAATGGCACAGAAGGCCCTAGCTTCTACGTGCCCTTCTCCAATGCGATGGGTGTGGTACGCAGCCCCTTCGAGTACCCACAGTACTACCTGGCTGAGCCATG	16	0.00014	0
GAATGGCACAGAAGGCCCTAACTTCTACGTGCCTTTCTCCAATGCGATGGGTGTGGTACGCAGCCCCTTCGAGTACCCACAGTACTACCTGGCTGAGCCATG	16	0.00014	0
GAATGGCACAGAAGGCCCTAACTTCTACGTGCCCTTCTCCAATGCGATGGGTGTAGTACGCAGCCCCTTCGAGTACCCACAGTACTACCTGGCTGAGCCATG	16	0.00014	0
GAATGGCACAGAAGGCCCTAACTTCTACGTGCCCTTCTCCAATGCGATGGGTGTGGTACGCAGCCCCTTCGAGTACCCACAGTACTACCTGGCTGAGCCATG	16	0.00014	47TGGGTGTG
GAATGGCACAGAAGGCCCTAACTTCTACGTGCCCTTCTCC-ATGCGATGGGTGTGGTACGCAGCCCCTTCGAGTACCCACAGTACTACCTGGCTGAGCCATG	16	0.00014	0
GAATGGCACAGAAGGCCCTAACTTCTACGTGCCCTTCTCCAATGCGATGGGTGGGGTACGCAGCCCCTTCGAGTACCCACAGTACTACCTGGCTGAGCCATG	16	0.00014	0
GAATGGCACAGAAGGCCCTAACTTCTACGTGACCTTCTCCAATGCGATGGGTGTGGTACGCAGCCCCTTCGAGTACCCACAGTACTACCTGGCTGAGCCATG	16	0.00014	0
GAATGGCACAGAAGGCCCTAACTTCTACGTGCCCTTCTCCAATGCGATGGGTGTGGTACGCAGCCCCTTCGAGTACCCACAGTACTACCTGGCTGAGACATG	16	0.00014	0
GAATGGCACAGAAGGCCCTAACTTCTACGTGCCCTTCTCCAAT--GA-GGGTGTGGTACGCAGCCCCTTCGAGTACCCACAGTACTACCTGGCTGAGCCATG	16	0.00014	0
GAATGGCACAGAAGGCCCTAACTTCTACGTGCCCTTCTCCAATGCGATGGGTGTGGTACGCAGCCCCGTCGAGTACCCACAGTACTACCTGGCTGAGCCATG	16	0.00014	0
GAATGGCACAGCAGGCCCTAACTTCTACGTGCCCTTCTCCAATGCGATGGGTGTGGTACGCAGCCCCTTCGAGTACCCACAGTACTACCTGGCTGAGCCATG	15	0.00013	0
GAATGGCACAGAAGGCCCTAACTTCTACGTGCCCTTCTCCAATGCGATGGGTGTGGTGCGCAGCCCCTTCGAGTACCCACAGTACTACCTGGCTGAGCCATG	15	0.00013	0
GAATGGCACAGAAGGCCCTAACTTCTACGTGCCCTTCTCCAATG----------GGTACGCAGCCCCTTCGAGTACCCACAGTACTACCTGGCTGAGCCATG	15	0.00013	0
GAATGGCACAGAAGGCCCTAACTTCTACGTGCCCTTCTCCAATGCGATGGGTGTGGTACGCAGCCCCTTCTAGTACCCACAGTACTACCTGGCTGAGCCATG	15	0.00013	0
GAATGGCACAGAAGGCCCTAACTTCTACGTGCCCTTCTCCA--GCGATGGGTGTGGTACGCAGCCCCTTCGAGTACCCACAGTACTACCTGGCTGAGCCATG	15	0.00013	0
GAATGGCACAGAAGGCCCTAACTTCTACGTGCCCTTCTCCAA---------TGT--TACGCAGCCCCTTCGAGTACCCACAGTACTACCTGGCTGAGCCATG	14	0.00012	0
GAATGGCACAGAAGG-CCTAACTTCTACGTGCCCTTCTCCAATGCGATGGGTGTGGTACGCAGCCCCTTCGAGTACCCACAGTACTACCTGGCTGAGCCATG	14	0.00012	0
GAATTGCACAGAAGGCCCTAACTTCTACGTGCCCTTCTCCAATGCGATGGGTGTGGTACGCAGCCCCTTCGAGTACCCACAGTACTACCTGGCTGAGCCATG	14	0.00012	0
GAATGTCACAGAAGGCCCTAACTTCTACGTGCCCTTCTCCAATGCGATGGGTGTGGTACGCAGCCCCTTCGAGTACCCACAGTACTACCTGGCTGAGCCATG	14	0.00012	0
GAATGGCACAGAAGGCCCTAACTTCTACGTGCCCTTCTCCAATGCGATGGGTGTGGTACGCAGCCCCTACGAGTACCCACAGTACTACCTGGCTGAGCCATG	14	0.00012	0
GAATGGCACAGAAGGCCCTAACTTCTACGTGCCCTTCTCCAATGCGATGGGTGTGGTACGCAGCCCCTTCGAGTACCCACAGTACTACCTGGCTGAGCCATG	14	0.00012	45GAT
GAATGGCACAGAAGGCCCTAACTTCTACGTGCCCTTCTCCAATGCGATGGGTGTGGAACGCAGCCCCTTCGAGTACCCACAGTACTACCTGGCTGAGCCATG	14	0.00012	0
GAATGGCACAGAAGGCCCTAACTTCTACGTGCCCTTCTCCAATGCGATGGGTGTGGTACGCAGCCCCTTCGAGTACCCACAGTACTACCTGGCTTAGCCATG	14	0.00012	0
GAATGGCACAGAAGGCCCTAACTTCTACGTGCCCTTCTCCAATGCGATGGGTGTGGTACGCAGCACCTTCGAGTACCCACAGTACTACCTGGCTGAGCCATG	14	0.00012	0
GAATGGCACAGAAGGCCCTAACTTCTACGTGCCCTTCTCCAATGCGATGGGTTTGGTACGCAGCCCCTTCGAGTACCCACAGTACTACCTGGCTGAGCCATG	14	0.00012	0
GAATGGCACAGAAGGCCCTAACTTCTACGTGCCCTTCTCCAATGCGATGGGTGTGGTACGCAGCCCCTTCGAGTACCCACAGTACTACCTGGCTGAGCCATG	13	0.00011	44TA
GAATGGCACAGATGGCCCTAACTTCTACGTGCCCTTCTCCAATGCGATGGGTGTGGTACGCAGCCCCTTCGAGTACCCACAGTACTACCTGGCTGAGCCATG	13	0.00011	0
GAATGGCACAGAAGGCCCTAACTTCTACGTGCCCTTCTTCAATGCGATGGGTGTGGTACGCAGCCCCTTCGAGTACCCACAGTACTACCTGGCTGAGCCATG	13	0.00011	0
GAATGGCACAGAAGGCCCTAAATTCTACGTGCCCTTCTCCAATGCGATGGGTGTGGTACGCAGCCCCTTCGAGTACCCACAGTACTACCTGGCTGAGCCATG	13	0.00011	0
GAATGGCACAGAAGGCCCTAACTTCTACGTGCCCTTCTCCAATGCGATGGGTGAGGTACGCAGCCCCTTCGAGTACCCACAGTACTACCTGGCTGAGCCATG	13	0.00011	0
GAATGGCACAGAAGGCCCTAACTTCTACGTGCCCTTCTCCAATGCGATGGGTGTGGTACGCAGCCCCTTCGAG--CCCGCAGTACTACCTGGC-GA-CCATG	13	0.00011	74AG94GA
GAATGGCACAGAAGGCCCTAACTTCTACGTGCCCTTCTCCAATGCGATGGGTGTGGTACGCAGCCCCTTCGAGTACCCACAGTACTACCTGGCTGAGCCATG	13	0.00011	43GG
GAATGGCACAGTAGGCCCTAACTTCTACGTGCCCTTCTCCAATGCGATGGGTGTGGTACGCAGCCCCTTCGAGTACCCACAGTACTACCTGGCTGAGCCATG	13	0.00011	0
GAATGGCACAGAAGGCCCTAACTTCTACGTGCCCTTCTCCAATGCGACGGGCGTGGTACGCAGCCCCTTCGAGTACCCACAGTACTACCTGGCTGAGCCATG	13	0.00011	0
GAATGGCACAGAAGGCCCTAACTTCTACGTGCCCGTCTCCAATGCGATGGGTGTGGTACGCAGCCCCTTCGAGTACCCACAGTACTACCTGGCTGAGCCATG	13	0.00011	0
GAATGGCACAGAAGGCCCTAACTTCTACGTGCCCTTCTCCAATGCGATGGGTGTGGTACGCAGCCCCTTCGAGTACCCACAGTACTACCTGGCTGAGCCATT	13	0.00011	0
GAATGGCACAGAAGGCCCTAACTTATACGTGCCCTTCTCCAATGCGATGGGTGTGGTACGCAGCCCCTTCGAGTACCCACAGTACTACCTGGCTGAGCCATG	13	0.00011	0
GAATGGCACAGAAGGCCCTAACTTCTACGTGCCCTTCTCC----CGATGGGTGTGGTACGCAGCCCCTTCGAGTACCCACAGTACTACCTGGCTGAGCCATG	13	0.00011	38C
GAATGGCACAGAAGGCCCTAACTTCTACGTGCCCTTCTCCAATG------------------GCCCCTTCGAGTACCCACAGTACTACCTGGCTGAGCCATG	13	0.00011	0
GAATGGCACAGAAGGCCCTAACTTCTACGTGCCCTTCTCCAAT---ATGGGTGTGGTACGCAGCCCCTTCGAGTACCCACAGTACTACCTGGCTGAGCCATG	13	0.00011	0
TAATGGCACAGAAGGCCCTAACTTCTACGTGCCCTTCTCCAATGCGATGGGTGTGGTACGCAGCCCCTTCGAGTACCCACAGTACTACCTGGCTGAGCCATG	13	0.00011	0
GAATGGCACAGAAGGCCCTAACTTCTACGTGCCCTTCTCCAATGCGATGGGTGTGGTACGCAGCCCCTTCGAGTACCAACAGTACTACCTGGCTGAGCCATG	13	0.00011	0
GAATGGCACAGAAGGCCCTAACTTCTACGTGCCCTTCTCC------ATGGGTGTGGTACGCAGCCCCTTCGAGTACCCACAGTACTACCTGGCTGAGCCATG	12	0.0001	0
GAATGGCACAGAAGGCCCTAACTTTTACGTGCCCTTCTCCAATGCGATGGGTGTGGTACGCAGCCCCTTCGAGTACCCACAGTACTACCTGGCTGAGCCATG	12	0.0001	0
GAATGGCACAGAAGGCCCTAACTTCTACGTGCCCTTCTCCAATGCGATGGGTGTGGTACGCAGCCCCTTCGAGTA-CCACAGTACTACCTGGCTGAGCCATG	12	0.0001	0
GAATGGCACAGAAGGCCCTAACTTCTACGTGCCCTTCTCCAATGCGATTGGTGTGGTACGCAGCCCCTTCGAGTACCCACAGTACTACCTGGCTGAGCCATG	12	0.0001	0
GAATGGCACAGAAGGCCCTAACTTCTACGTGCCCTTCTCCAATGCGATGGGTGTGGTACGCAGCCCCTTCGTGTACCCACAGTACTACCTGGCTGAGCCATG	12	0.0001	0
GAATGGCACAGAAGGCCCTAACTTCTACGTGCCCTTCTCCAATGCGATGGGTGTGGTACGCAGCCCCTTCGAGTACCCACCGTACTACCTGGCTGAGCCATG	12	0.0001	0
GAATGGCACAGAAGGCCCTAACTTCTACGTGCCCTTCTCCAATGCGATGTGTGTGGTACGCAGCCCCTTCGAGTACCCACAGTACTACCTGGCTGAGCCATG	12	0.0001	0
GAATGGCACAGAAGGCCCTAACTTCTACGTGCCCTTCTCCAA--CGA--GGCGTGGT--GCAGCCCCTTCGAG--CCCGCAGTACTACCTGGC-GA-CCATG	12	0.0001	44TCAC59GG74AG94GA
GAATGGCACAGAAGGCCCTAACTTCTACGTGCCCTTCTCCAATGCGATGGTTGTGGTACGCAGCCCCTTCGAGTACCCACAGTACTACCTGGCTGAGCCATG	12	0.0001	0
GAATGGCACAGAAGGCCCTAACTTCTACGTGCCCTTCTCCAATGCGACGGGTGTGGTACGCAGCCCCTTCGAGTACCCACAGTACTACCTGGCTGAGTCATG	12	0.0001	0
GAATGGCACAGAAGGCCCTAACTTCTACGTGCCCTTCTCCAAT----------------GCAGCCCCTTCGAGTACCCACAGTACTACCTGGCTGAGCCATG	12	0.0001	0
GAACGGCACAG-AGGCCC-AA-TT-TATGTGCCCTTCTCCAA--CGA--GGCGTGGT--GCAGCCCCTTCGAG--CCCGCAGTACTACCTGGCTGAGCCATG	12	0.0001	14GC22TT44TCAC59GG74AG
GAATGGCACAGAAGGCCCTAACTTCTACGGGCCCTTCTCCAATGCGATGGGTGTGGTACGCAGCCCCTTCGAGTACCCACAGTACTACCTGGCTGAGCCATG	12	0.0001	0
GAATGGCACAGAAGGCCCTAACTTCTACGTGCCCTTCTCCAATGCGATGGGTGTGGTACGCAGCCCCTTCGAGTACCCACAGTACTACCTGGATGAGCCATG	12	0.0001	0
GAATGGCACAGAAGGCCCTAACTTCTACGTGCCCTTATCCAATGCGATGGGTGTGGTACGCAGCCCCTTCGAGTACCCACAGTACTACCTGGCTGAGCCATG	11	9e-05	0
GAATGGCACAGAAGGCCCTAACTTCTACGTGCCCTTCTCCAATGCGATGGGTGTGGTACTCAGCCCCTTCGAGTACCCACAGTACTACCTGGCTGAGCCATG	11	9e-05	0
GAATGGCACAGAAGGCCCTAACTTCTACGTGCCCTTCTCCAATG-----------------AGCCCCTTCGAGTACCCACAGTACTACCTGGCTGAGCCATG	11	9e-05	0
GAATGGCACAGAAGGCCCTAACTTCTACGTGCCCTTCTCCAATGCGATGGGTGTGGTACGCAGCCCCTTCGAGTACCCACTGTACTACCTGGCTGAGCCATG	11	9e-05	0
GAATGGCACAGAAGGCCCTAACTTCTACGTGCCCATCTCCAATGCGATGGGTGTGGTACGCAGCCCCTTCGAGTACCCACAGTACTACCTGGCTGAGCCATG	11	9e-05	0
GAATGGCACAGAAGGCCCTAACTTCTACGTGCCCTTCTCCAATGCGATGGGTGTGGTACGCAGCCCCTTCGAGTACCCACAGTACTACCTGGCTGAGCAATG	11	9e-05	0
GAATGGCACAGAAGGCCCTAACTTCTACGTGCCCTTCTCCAAT-------------------GCCCCTTCGAGTACCCACAGTACTACCTGGCTGAGCCATG	11	9e-05	0
GAATGGCACAGAAGGCCCTAACTTCTACGTGCCC-TCTCCAATGCGATGGGTGTGGTACGCAGCCCCTTCGAGTACCCACAGTACTACCTGGCTGAGCCATG	11	9e-05	0
GAATGGCACAGAAGGCCCTAATTTCTACGTGCCCTTCTCCAATGCGATGGGTGTGGTACGCAGCCCCTTCGAGTACCCACAGTACTACCTGGCTGAGCCATG	11	9e-05	0
GAATGGCACTGAAGGCCCTAACTTCTACGTGCCCTTCTCCAATGCGATGGGTGTGGTACGCAGCCCCTTCGAGTACCCACAGTACTACCTGGCTGAGCCATG	11	9e-05	0
GAATGGCACAGAAGGCCCTAACTTCTACGTGCCCTTCTCCAATGCGACGGGTGTGGTACGCAACCCCTTCGAGTACCCACAGTACTACCTGGCTGAGCCATG	11	9e-05	0
GAATGGCACAGAAGGCCCTAACTTCTACGTGCCCTTCTCCAATGCGACGGGTGTGGTACGCAGCCCCTTCGAGTACCCACAGTACTACATGGCTGAGCCATG	11	9e-05	0
GAATGGCACAGAAGGCCCTAACTTCTACGTGCCCTTCTCCAATGCGATGGGTGTTGTACGCAGCCCCTTCGAGTACCCACAGTACTACCTGGCTGAGCCATG	11	9e-05	0
GAATGGCACAGAAGGCCCTAACTTCTACGTGCCCTTCTCCAATGCGACGGGTGTGGTACACAGCCCCTTCGAGTACCCACAGTACTACCTGGCTGAGCCATG	10	9e-05	0
GAATGGCACAGAAGGCCCTAACTTCTACGTGCCC----------CGATGGGTGTGGTACGCAGCCCCTTCGAGTACCCACAGTACTACCTGGCTGAGCCATG	10	9e-05	0
GAATGGCACAGAAGGCCCTAACTTCTACGTGCCCTTCTCCAA----A-GGGTGTGGTACGCAGCCCCTTCGAGTACCCACAGTACTACCTGGCTGAGCCATG	10	9e-05	0
GAATGGCACAGAAGGCCCTAACTTCTACGTGCCCTTCTCCAATGCGATGAGTGTGGTACGCAGCCCCTTCGAGTACCCACAGTACTACCTGGCTGAGCCATG	10	9e-05	0
GAATGGCACAGAAGGCCCTAACTTCTACGTGCCCTTCTCCAATGTGACGGGTGTGGTACGCAGCCCCTTCGAGTACCCACAGTACTACCTGGCTGAGCCATG	10	9e-05	0
GAATGGCACAGAAGGCCCTAACTTCTACGTGCCCTTCTCCAATGCGATGGGTGTGGTACGCAGCCTCTTCGAGTACCCACAGTACTACCTGGCTGAGCCATG	10	9e-05	0
GAAAGGCACAGAAGGCCCTAACTTCTACGTGCCCTTCTCCAATGCGATGGGTGTGGTACGCAGCCCCTTCGAGTACCCACAGTACTACCTGGCTGAGCCATG	10	9e-05	0
GAATGGCACAGAAGGCCCTAACTTCTACGTGCCCTTCTCCAATGCGATGGGTGTGGTACGCAGCCCCTTCGAGTACCCACAGTACTACCTGGCTGAGCCATG	10	9e-05	44GC
GAATGGCACAGAAGGCCCTAACTTCTACGTGCCCTTCTCCAATGCGATGGGTGTGGTACGAAGCCCCTTCGAGTACCCACAGTACTACCTGGCTGAGCCATG	10	9e-05	0
GAATGGCACAGAAGGCCCTAACTTCTACGTGCCCTTCTCCAATGCGATGGGTGTGGTACGCAGCCCCTTCGAGTACCCACAGTAATACCTGGCTGAGCCATG	10	9e-05	0
GAATGGCACAGAAGGCCCTAACTTCTACGTTCCCTTCTCCAATGCGATGGGTGTGGTACGCAGCCCCTTCGAGTACCCACAGTACTACCTGGCTGAGCCATG	10	9e-05	0
GAATGGCACAGAAGGCCCTAACTTCTACGTGCCCTTCTCCAATG-GATGGGTGTGGTACGCAGCCCCTTCGAGTACCCACAGTACTACCTGGCTGAGCCATG	10	9e-05	43GG
GAATGGCACAGAAGGCCCTAACTTCTACGTGCCCTTCTCCAATGCGCTGGGTGTGGTACGCAGCCCCTTCGAGTACCCACAGTACTACCTGGCTGAGCCATG	10	9e-05	0
GAATGGCACAGAAGGCCCTAACTTCTACGTGCCCTTCTCCAATGCGATGGGTGTGGTACGCAGCCCCTTCGAGTACCCGCAGTACTACCTGGCTGAGCCATG	9	8e-05	0
GAATGGCACAGAAGTCCCTAACTTCTACGTGCCCTTCTCCAATGCGATGGGTGTGGTACGCAGCCCCTTCGAGTACCCACAGTACTACCTGGCTGAGCCATG	9	8e-05	0
GAATGGCACAGAAGGCCCTAACTTCTACGTGCCCTTCTCCAATGCGATGGGTGTGGTACGCAGCCCCTTCGAGTACCCACAGTACTACATGGCTGAGCCATG	9	8e-05	0
GAATGGCACAGAAGGCCCTAACTTCTACGTGCCCTTCTCCAATGCGATGGGTGTGGTACGCAGCCCCTTCGAGTACCCACAGTACTACCTGGCTGAGCCATG	9	8e-05	63C
GAATGGCACAGAAGGCCCTAACTTCTACGTGCCCTTCTCCAATGCGATGGGTGTGGTACGCAGCCCCTTCGAGTACCCACATTACTACCTGGCTGAGCCATG	9	8e-05	0
GAATGGCACAGAAGGCCCTAACTTCTACGTGCCCTTCTCCAAT-CGATGGGTGTGATACGCAGCCCCTTCGAGTACCCACAGTACTACCTGGCTGAGCCATG	9	8e-05	0
GAATGGAACAGAAGGCCCTAACTTCTACGTGCCCTTCTCCAATGCGATGGGTGTGGTACGCAGCCCCTTCGAGTACCCACAGTACTACCTGGCTGAGCCATG	9	8e-05	0
GAATGGCACAGAAGGCCCTAACTTCTACGTGCCCTTCTCCAATGCGATGGGTGTGGTACGCAGCCCCTTCGAGTACCCACAGTACTACCTGGCTGAGCCATG	9	8e-05	47TG
GAATGGCACAGAAGGCCCTCACTTCTACGTGCCCTTCTCCAATGCGATGGGTGTGGTACGCAGCCCCTTCGAGTACCCACAGTACTACCTGGCTGAGCCATG	9	8e-05	0
GAATGGCACAGAAGGCCCTAACTTCTACGTGCCCTTCTCCAATG-------------ACGCAGCCCCTTCGAGTACCCACAGTACTACCTGGCTGAGCCATG	9	8e-05	0
GAATGGCACAGAAGGCCCTAACTTCTACGTGCCCTTCTCCAATGCGACGGGTGTGGTACGCAGCCCCTTCGAGTACCCACAGTACTACCCGGCTGAGCCATG	9	8e-05	0
GAATGGCACAGAAGGCCCTAACTTCTACGTGCCCTTCTCCAATGCCATGGGTGTGGTACGCAGCCCCTTCGAGTACCCACAGTACTACCTGGCTGAGCCATG	9	8e-05	0
GAATGGCACAGAAGGCCCTAACTTCTACGTGCCCTTCTCCAATGCGATGGGTGTGGTACGCAGCCCCTTCGAGTACCCAAAGTACTACCTGGCTGAGCCATG	9	8e-05	0
GATTGGCACAGAAGGCCCTAACTTCTACGTGCCCTTCTCCAATGCGATGGGTGTGGTACGCAGCCCCTTCGAGTACCCACAGTACTACCTGGCTGAGCCATG	9	8e-05	0
GAATGGCACAGAAGGCCCTAACTTCTACGTGCCCTTCTCCAATGCGAT-GGTGTGGTACGCAGCCCCTTCGAGTACCCACAGTACTACCTGGCTGAGCCATG	9	8e-05	0
GAATGGCACAGAAGGCCCTAACTTCTACGTGCCCTTCTCCAATG-G--GGGTGTGGTACGCAGCCCCTTCGAGTACCCACAGTACTACCTGGCTGAGCCATG	9	8e-05	0
GAATGGCACAGAAGGCCCTAACTTCTACTTGCCCTTCTCCAATGCGATGGGTGTGGTACGCAGCCCCTTCGAGTACCCACAGTACTACCTGGCTGAGCCATG	9	8e-05	0
GAATGGCACAGAAGGCCCTAACTTCTACGTGCCCTTCTCCAATGCGACGGGTGTGGTACGCAGCCCCTTCGAGTACCCACAGTACTACCTGGCTGGGCCATG	8	7e-05	0
GAATGCCACAGAAGGCCCTAACTTCTACGTGCCCTTCTCCAATGCGATGGGTGTGGTACGCAGCCCCTTCGAGTACCCACAGTACTACCTGGCTGAGCCATG	8	7e-05	0
GAATGGCACAGAAGGCCCTAACTTCTACGTGCCCTTCTCCAAGGCGATGGGTGTGGTACGCAGCCCCTTCGAGTACCCACAGTACTACCTGGCTGAGCCATG	8	7e-05	0
GAATGGCACAGAAGGCCCTAACTTCTACGTGCCCTTCTCCAATGCGATGGGTGTGGTACGCAGCCCCTTCGAGTACCCACAGTACTACCTGGCTGACCCATG	8	7e-05	0
GAATGGCACAGAAGGCCCTAACTTCTACGTGCCCTTCCCCAATGCGACGGGTGTGGTACGCAGCCCCTTCGAGTACCCACAGTACTACCTGGCTGAGCCATG	8	7e-05	0
GAATGGCACAGAAGGCCCTAACTTCTACGTGCCCTTCTCCAATGCGATGGGTGTGGTACGCAGCCCCTTCGAGTAACCACAGTACTACCTGGCTGAGCCATG	8	7e-05	0
GAATGGCACAGAAGGCCCTAACTTCTACGTGCCCTTCTCCAATG---T-GGTGTGGTACGCAGCCCCTTCGAGTACCCACAGTACTACCTGGCTGAGCCATG	8	7e-05	0
GAACGGCACAG-AGGCCC-AA-TT-TATGTGCCCTTCTCCAA--CGA--GGCGTGGT--GCAGTCCCTTCGAG--CCCGCAGTACTACCTGGC-GA-CCATG	8	7e-05	14GC22TT44TCAC59GG74AG94GA
GAATGGCACAGAAGGCCCTAACTTCTACGTGCCCTTCTCCAATGCGATGGGTGTGGTACGCAGCCCCTTCGAGTACCCTCAGTACTACCTGGCTGAGCCATG	8	7e-05	0
GAATGGCACAGAAGGCCCTAACTTCTACGTGCCCTTCTCCAATGCGACGGGTGCGGTACGCAGCCCCTTCGAGTACCCACAGTACTACCTGGCTGAGCCATG	8	7e-05	0
GAATGGCACAGAAGGCCCTAACTTCTACGTGCCCTTCTCCAATGC--TGGGTGTGGTACGCAGCCCCTTCGAGTACCCACAGTACTACCTGGCTGAGCCATG	8	7e-05	0
GAATGGCACAGAAGGCCCTAACTTCTACGTGCCCTTCTCCAATGCGATGGGTGTGGTACGCAGCCCCTTCGAGTACCCACAGTACTACCTGGCTGAGCCAAG	8	7e-05	0
GAACGGCACAG-AGGCCC-AA-TT-TATGTGCCCTTCTCCAA--CGA--GGCGTGGT--GCAGCCCCTTCGAG--CCCGCAGTACTACCTGGC-GA-CCATG	8	7e-05	13GC21TT43TCAC58GG73AG93GA
GAATGGCACAGAAGGCCCTAACTTCTACGTGCCCTTCTCCAATGCGATGGGTGTGGTACGCAGCCCCTTCGAGTACCCACAGTACTACTTGGCTGAGCCATG	8	7e-05	0
GAATGGCACAGAAGGCCCTAACTTCTACGTGCCCTTCTCCAATGCGATGGGTGTGGTACGCCGCCCCTTCGAGTACCCACAGTACTACCTGGCTGAGCCATG	8	7e-05	0
GAATGGCACAGAAGGCCCTAACTTCTACGTGCCCTTCTCCAA--------------TACGCAGCCCCTTCGAGTACCCACAGTACTACCTGGCTGAGCCATG	8	7e-05	0
GAATGGCACAGAAGGCCCTAACTTCTACGTGCCCTTCTCCAATGCGATGGGTGTGTTACGCAGCCCCTTCGAGTACCCACAGTACTACCTGGCTGAGCCATG	8	7e-05	0
GAATGGCACAGAAGGCCCTAACTTCTACGTGCCCTTCTCCAATGCGACGGGTGTGGTACGTAGCCCCTTCGAGTACCCACAGTACTACCTGGCTGAGCCATG	8	7e-05	0
GAATGGCACAGAAGGACCTAACTTCTACGTGCCCTTCTCCAATGCGATGGGTGTGGTACGCAGCCCCTTCGAGTACCCACAGTACTACCTGGCTGAGCCATG	8	7e-05	0
GAATGGCACAGAAGGCCCTAACTTCTACGTGCCCTTCTCC---GCGATGGGTGTGGTACGCAGCCCCTTCGAGTACCCACAGTACTACCTGGCTGAGCCATG	8	7e-05	0
GAATGGCACAGAAGGCCTTAACTTCTACGTGCCCTTCTCCAATGCGATGGGTGTGGTACGCAGCCCCTTCGAGTACCCACAGTACTACCTGGCTGAGCCATG	8	7e-05	0
GAATGGCACAGAAGGCCCTAACTTCTACGTGCCCTTCACCAATGCGATGGGTGTGGTACGCAGCCCCTTCGAGTACCCACAGTACTACCTGGCTGAGCCATG	8	7e-05	0
GAATGGCACAGAAGGCCCTAACTTCTACGTGCCCTTCTCCAATGCGATGGGTGTGGTACGCAGCCCCTTCGAGTACCCACAGTACTACCTGGCTGAGCCCTG	8	7e-05	0
GAATGGCACAGAAGGCCCTAACTTCTACGTGCCCTTCTCCAATGCGATGGGTGTGGTACGCAGCCCCTTCGATTACCCACAGTACTACCTGGCTGAGCCATG	8	7e-05	0
GAATGGCACAGAAGGCCCTAACTTCTACGTGCCCTACTCCAATGCGATGGGTGTGGTACGCAGCCCCTTCGAGTACCCACAGTACTACCTGGCTGAGCCATG	8	7e-05	0
GAATGGCACAGAAGGCCCTAACTTCTACGTGCCCTTCTCCAATGCGATGGGTGTGGTACGCAGCCCCTTCGAGTACCCACAGTTCTACCTGGCTGAGCCATG	7	6e-05	0
GAATGGCACAGAAGGCCCTAACTTCTACGTGCCCTTCTCCAATGC-----------TACGCAGCCCCTTCGAGTACCCACAGTACTACCTGGCTGAGCCATG	7	6e-05	0
GAATGGCACAGAAGGCCCTAACTTCTACGTGCCCTTCTCCAATGCGATGGGTGTGGTACGCAGCTCCTTCGAGTACCCACAGTACTACCTGGCTGAGCCATG	7	6e-05	0
GAATGGCACAGAAGGCCCTAACTTCTACGTGCCCTTCTCCAATGCGACGGGTGTGGTATGCAGCCCCTTCGAGTACCCACAGTACTACCTGGCTGAGCCATG	7	6e-05	0
GAATGGCACAGAAGGCCCTAACTTCTACGTGCCCTTCTCCAATGCGATGGGTGTGGTACGCAGCCCCTTCGAGAACCCACAGTACTACCTGGCTGAGCCATG	7	6e-05	0
GAATGGCACAGAAGGCCATAACTTCTACGTGCCCTTCTCCAATGCGACGGGTGTGGTACGCAGCCCCTTCGAGTACCCACAGTACTACCTGGCTGAGCCATG	7	6e-05	0
GAATGGCACAGAAGGCCCTAACTTCTACGTGCCCTTCTCCAA----ATGGGTGTGGTACGCAGCCCCTTCGAGTACCCACAGTACTACCTGGCTGAGCCATG	7	6e-05	0
GAATGGCACAGAAGGCCCTAACTTCTACGTGCCCTTCTCCAATGCGATGGGTGTGGTACGCAGCCCCTTCGAGTACCCACAGTACTACCTGGCTGAGCCATG	7	6e-05	42T
GAATGGCACCGAAGGCCCTAACTTCTACGTGCCCTTCTCCAATGCGATGGGTGTGGTACGCAGCCCCTTCGAGTACCCACAGTACTACCTGGCTGAGCCATG	7	6e-05	0
GAATGGCACAGAAGGCCCTAACTTCTACGTGCCCTTCTCCAATGCGATGGGTGTGGTAAGCAGCCCCTTCGAGTACCCACAGTACTACCTGGCTGAGCCATG	7	6e-05	0
GAATGGCACAGAAGGCCCTAACTTCTACGTGCCCT----C----CGATGGGTGTGGTACGCAGCCCCTTCGAGTACCCACAGTACTACCTGGCTGAGCCATG	7	6e-05	0
GAATGGCACAGAAGGCCCTAACTTCTACGTGCCCTTCTCCAATGCGATGGGTGTGGTACGCAGCCCCTTCGAGTACCCACAGTACTACCTGGCTGAGCCATG	7	6e-05	36CGCCCGGC47AGTGAGCGAGCGAGCGCG67GAGAGGG75G78GCCAACT
GAATGGCACAGAAGGCCCTAACTTCTACGTGCCCTTCTCCAAT--GATGGGTGTGGTACGCAGCCCCTTCGAGTACCCACAGTACTACCTGGCTGAGCCATG	7	6e-05	44T
GAATGGCACAGAAGGCCCTAACTTCTACGTGCCCTTCTCCAATGCGACGGGTGTGATACGCAGCCCCTTCGAGTACCCACAGTACTACCTGGCTGAGCCATG	7	6e-05	0
AAATGGCACAGAAGGCCCTAACTTCTACGTGCCCTTCTCCAATGCGACGGGTGTGGTACGCAGCCCCTTCGAGTACCCACAGTACTACCTGGCTGAGCCATG	7	6e-05	0
GAATGGCACAGAAGGCCCTAACTTCTACGTGCCCTTCTCCAATGCGACGGGTGTGGTACGCAGCCCCTTCGAGTACCCACAGTACTACCTGGCTTAGCCATG	7	6e-05	0
GAATGGCACAGAAGGCCCTAACTTCTACGTGCACTTCTCCAATGCGACGGGTGTGGTACGCAGCCCCTTCGAGTACCCACAGTACTACCTGGCTGAGCCATG	7	6e-05	0
GAATGGCACAGAAGGCCCTAACTTCTACATGCCCTTCTCCAATGCGACGGGTGTGGTACGCAGCCCCTTCGAGTACCCACAGTACTACCTGGCTGAGCCATG	7	6e-05	0
GAATGGCACAGAAGGCCCTAACTTCTACGTGCCCTTCTCCATTGCGATGGGTGTGGTACGCAGCCCCTTCGAGTACCCACAGTACTACCTGGCTGAGCCATG	7	6e-05	0
GAATGGCACAGAAGGCCCTAACTTCTACGTGCCCTTCTCCAATGCGATGGGTGTGGTACGCAG-CCCTTCGAGTACCCACAGTACTACCTGGCTGAGCCATG	7	6e-05	0
GAATGGCACAGAAGGCCCTAACTTCTACGTGCCCTTCTCCAAT-CGACGGGTGTGGTACGCAGCCCCTTCGAGTACCCACAGTACTACCTGGCTGAGCCATG	7	6e-05	0
GAATGGCCCAGAAGGCCCTAACTTCTACGTGCCCTTCTCCAATGCGATGGGTGTGGTACGCAGCCCCTTCGAGTACCCACAGTACTACCTGGCTGAGCCATG	7	6e-05	0
GAATGGCACAGAAGGCCCTAAC-----------------------------TGTGGTACGCAGCCCCTTCGAGTACCCACAGTACTACCTGGCTGAGCCATG	7	6e-05	0
GAATGGCACAGAAGGCCCTACCTTCTACGTGCCCTTCTCCAATGCGATGGGTGTGGTACGCAGCCCCTTCGAGTACCCACAGTACTACCTGGCTGAGCCATG	7	6e-05	0
GAATGGCACAGAAGGCCCT-ACTTCTACGTGCCCTTCTCCAATGCGATGGGTGTGGTACGCAGCCCCTTCGAGTACCCACAGTACTACCTGGCTGAGCCATG	7	6e-05	0
GAATGGCACAGAAGGCCCTAACTTCTACGTGCCCTTCTCCAATGCGACGGGTGTGGTACGCAGCCCCTTCGAGTACCCACAGTACTACCTGGCTGAACCATG	6	5e-05	0
GAATGGCACAGAAGGCCCTAACTTCTACGTGCCCTTCTCCAATGCGATGGGTGTGGTACGCAGCCCCTTCGAGTTCCCACAGTACTACCTGGCTGAGCCATG	6	5e-05	0
GAATGGCACAGAAGGCCCTAACTTCTACGTGCCCTTCTCCAATGCGATGGGTGTGGTACGCAGCCCCTTAGAGTACCCACAGTACTACCTGGCTGAGCCATG	6	5e-05	0
GAATGGCACAGAAGGCCCTAACTTCTATGTGCCCTTCTCCAATGCGACGGGTGTGGTACGCAGCCCCTTCGAGTACCCACAGTACTACCTGGCTGAGCCATG	6	5e-05	0
GAATGGCACAGAAGGCCCTAACTTCTACGTGCCCTTCTCCAATGCGATGGGTGTGGTACGCAGCCCCTTCGAGTACCCACAGTACTACCTGGCTGAGCCATG	6	5e-05	44CA
GAATGGCACAGAAGGCCCTAACTTCTACGTGCCCTTCTCCAATGCGATGGGTGTGGTACGCAGCCCCTTCGAGTACCCACAGTACTACCTGGCTGAGCCATG	6	5e-05	44CT
GAATGGCACAGAACGCCCTAACTTCTACGTGCCCTTCTCCAATGCGATGGGTGTGGTACGCAGCCCCTTCGAGTACCCACAGTACTACCTGGCTGAGCCATG	6	5e-05	0
#NAME?	6	5e-05	0
GAATGGCACAGAAGGCCCTAACTTCTACGTGCCCTTCTCCAATGCGATGGGTGTGGTACGCAGCCCTTTCGAGTACCCACAGTACTACCTGGCTGAGCCATG	6	5e-05	0
GAATGGCACAGAAGGCCCTAACTTCTACGTGCCCTTCTCCAATGCAACGGGTGTGGTACGCAGCCCCTTCGAGTACCCACAGTACTACCTGGCTGAGCCATG	6	5e-05	0
GAATGGCACAGAAGGCCCTAACTTCTACGTGCCCTTCTCCAATGCGATGGGTGTGGTACGCAGCCCCTTCGAGTACCCACAGTACTACCTGGCTGAGCCATG	6	5e-05	44AC
GTATGGCACAGAAGGCCCTAACTTCTACGTGCCCTTCTCCAATGCGATGGGTGTGGTACGCAGCCCCTTCGAGTACCCACAGTACTACCTGGCTGAGCCATG	6	5e-05	0
GAATGGCACAGAAGGCCCTAACTTCTACGTGCCCTTCTC--A--CGATGGGTGTGGTACGCAGCCCCTTCGAGTACCCACAGTACTACCTGGCTGAGCCATG	6	5e-05	0
GAATGGCACAGAAGGCCCTAACTTCTACGTGCCCTTCTCCAATGCGATGGGTGTGGT--GCAGCCCCTTCGAG--CCCGCAGTACTACCTGGC-GA-CCATG	6	5e-05	59GG74AG94GA
GAACGGCACAGAAGGCCCTAACTTCTACGTGCCCTTCTCCAAT-CGATGGGTGTGGTACGCAGCCCCTTCGAGTACCCACAGTACTACCTGGCTGAGCCATG	6	5e-05	0
GAATGGCACAGAAGGCCCTAACTTCTACGTGCCCTTCTCCAATGCGACGGGTGTGGTACGCAGCCCCTTCAAGTACCCACAGTACTACCTGGCTGAGCCATG	6	5e-05	0
GAATGGCACAGAAGGCCCTAACTTCTACGTGCCCTTCTCCAATGCGACGGGTGTGGTACGCAGCCCCTTCGAGTACCCACAGTACTACCTGACTGAGCCATG	6	5e-05	0
GAATGACACAGAAGGCCCTAACTTCTACGTGCCCTTCTCCAATGCGACGGGTGTGGTACGCAGCCCCTTCGAGTACCCACAGTACTACCTGGCTGAGCCATG	6	5e-05	0
GAATGGCACAGAAGGCCCTAACTTCTCCGTGCCCTTCTCCAATGCGATGGGTGTGGTACGCAGCCCCTTCGAGTACCCACAGTACTACCTGGCTGAGCCATG	6	5e-05	0
GAATGGCACAGAAGGCCCTAACTTCTACGTGCCCTTCTCCAATGC---GGGTGTGGTACGCAGCCCCTTCGAGTACCCACAGTACTACCTGGCTGAGCCATG	6	5e-05	0
GAATGGCACAGAAGGCCCTAACTTCTACGTGCCCTTCTCCAATGCGATGGGTGTGGTACGCAGCCCCTTCGAGTACCCACAGTACAACCTGGCTGAGCCATG	6	5e-05	0
GAATGGCACAGAAGGCCCTAACTTCTACGTGCCCTTCTCCAATGCGATGGGTGTGGTACGCAGCCCCTTCGAGTACCCACAGTACTACCTGGCTGAGCCATG	6	5e-05	42TGCGATGGGTG
GAATGGCACAGAAGGCCCTAACTTCTACGTGCCCTTC----A---GATGGGTGTGGTACGCAGCCCCTTCGAGTACCCACAGTACTACCTGGCTGAGCCATG	6	5e-05	0
GAATGGCACAGAAGGCCCTAACTTCTACGTGCCCTTCTCCAATGCGACGGGTGTGGCACGCAGCCCCTTCGAGTACCCACAGTACTACCTGGCTGAGCCATG	6	5e-05	0
GAATGGCACAGAAGGCCCTAACTTCTACGTGCCCTTCTCC-AT-C-----------TACGCAGCCCCTTCGAGTACCCACAGTACTACCTGGCTGAGCCATG	6	5e-05	0
GAATGGCACAGAAGGCCCTAACTTCTACGTGCCCTTCTCCAAAGCGATGGGTGTGGTACGCAGCCCCTTCGAGTACCCACAGTACTACCTGGCTGAGCCATG	6	5e-05	0
GAACGGCACAG-AGGCCC-AA-TT-TATGTGCCCTTCTCCAA--CGA--GGCGTGGT--GCAGCCCCTTCGAG--CCCGCAGTACTACCTGGC-GA-CCATG	6	5e-05	14GC22TT44TCAC59AG74AG94GA
GAATGGCACAGAAGGCCCTAACTTCTACGTGCCCTTCTCCAA----------GTGGTACGCAGCCCCTTCGAGTACCCACAGTACTACCTGGCTGAGCCATG	6	5e-05	0
GAATGGCTCAGAAGGCCCTAACTTCTACGTGCCCTTCTCCAATGCGATGGGTGTGGTACGCAGCCCCTTCGAGTACCCACAGTACTACCTGGCTGAGCCATG	6	5e-05	0
GAATGGCACAGAAGGCCCTAACATCTACGTGCCCTTCTCCAATGCGATGGGTGTGGTACGCAGCCCCTTCGAGTACCCACAGTACTACCTGGCTGAGCCATG	6	5e-05	0
GAATGGCACAGAAGGCCCTAACTTCTACGTGCCCTTCTCCAATGCGATGGGTGTGGTACGCAGCCCCTTCGAGTACCCACAGTACTAACTGGCTGAGCCATG	6	5e-05	0
GAACGGCACAG-AGGCCC-AA-TT-TATGTGCCCTTCTCCAATGCGATGGGTGTGGTACGCAGCCCCTTCGAGTACCCACAGTACTACCTGGCTGAGCCATG	6	5e-05	14GC22TT
GAATGGCACAGAAGGCCCTAACCTCTACGTGCCCTTCTCCAATGCGACGGGTGTGGTACGCAGCCCCTTCGAGTACCCACAGTACTACCTGGCTGAGCCATG	6	5e-05	0
GAATGGCACAGAAGGCCCTAACTTCTACGTGCCCTTCTCCAATG--ATGGGTGTGGTACGCAGCCCCTTCGAGTACCCACAGTACTACCTGGCTGAGCCATG	6	5e-05	43A
GAATGGCACAGAAGGCCCTAACTTCTACGTGCCATTCTCCAATGCGACGGGTGTGGTACGCAGCCCCTTCGAGTACCCACAGTACTACCTGGCTGAGCCATG	5	4e-05	0
GAATGGCACAGAAGGCCCTAACTTCTACGTGCCCTTCTCCAATGCGATGGGTGTGGTACGCAGCCCCTTCGAGTACCCACAGTACTACCTGGCGGAGCCATG	5	4e-05	0
GAATGGCACAGAAGGCCCTAACTTCTACGTGCCCTTCTCCAATGCGACGGGTATGGTACGCAGCCCCTTCGAGTACCCACAGTACTACCTGGCTGAGCCATG	5	4e-05	0
GAATGGCACAGAAGGCCCTAACTTCTACGTGCCCT----------GATGGGTGTGGTACGCAGCCCCTTCGAGTACCCACAGTACTACCTGGCTGAGCCATG	5	4e-05	0
GAATGGCACAGAAGGCCCTAACTTCTACGTG-CCTTCTCCAATGCGATGGGTGTGGTACGCAGCCCCTTCGAGTACCCACAGTACTACCTGGCTGAGCCATG	5	4e-05	0
GAATGGCACAGAAGGCCCTAACTTCTACGTGCCCTTCTCCAATGCGACGGGTGTGGTACGCAGCCCCTTCGAGTACCCACAGTACTACCTGGCTGAGCCACG	5	4e-05	0
GAATGGCACAGAAGGCCCTAACTTCTACGTGCCCTTCTCCAATGCGATGGGTGTGGTACGCAGCCCCTTCGAGTACCCACACTACTACCTGGCTGAGCCATG	5	4e-05	0
GAATGGCACAGAAGGCCCTAACTTCTACGTGCCCTTCTCCAATGCGACGGGTGTGGTACGAAGCCCCTTCGAGTACCCACAGTACTACCTGGCTGAGCCATG	5	4e-05	0
GAATGGCACAGAAGGCCCTAACTTCTACGTGCCCTTCTCCAATACGACGGGTGTGGTACGCAGCCCCTTCGAGTACCCACAGTACTACCTGGCTGAGCCATG	5	4e-05	0
GAATGGCACAGAAGGCCCTAACTTCTACGTGCCCTTCTCCAATGCGAAGGGTGTGGTACGCAGCCCCTTCGAGTACCCACAGTACTACCTGGCTGAGCCATG	5	4e-05	0
GAATGGCACAGAAGGCCCTAACTTCTACGTGCCCTTCTCCAATGCGACGGGTGTGGTACGCAGCCACTTCGAGTACCCACAGTACTACCTGGCTGAGCCATG	5	4e-05	0
GAATGGCACAGAAGGCCCTAACTTCTACGTGCCCTTCTCCAATGCGATGGGTGTGGTACGCAGCCCCTTCGAGTACCCACAGTACTACCTGGCTGAGCCATG	5	4e-05	48GG
GAATGGCACAGAAGGCCCTAACTTCTACGTGCCCTTCTCCAATGCGATGGGTGTGGTACGCAGCCCCTGCGAGTACCCACAGTACTACCTGGCTGAGCCATG	5	4e-05	0
GAATGGCACAGAAGGCCCTAACTTCTACGTGCCCTTCTCCAATG-GATGGGTGTGGTACGCAGCCCCTTCGAGTACCCACAGTACTACCTGGCTGAGCCATG	5	4e-05	43GGGTG
GAATGGCACAGAAGGCCCTAACTTCTACGTGCCCTTCTCC--------GGGTGTGGTACGCAGCCCCTTCGAGTACCCACAGTACTACCTGGCTGAGCCATG	5	4e-05	0
GAATCGCACAGAAGGCCCTAACTTCTACGTGCCCTTCTCCAATGCGATGGGTGTGGTACGCAGCCCCTTCGAGTACCCACAGTACTACCTGGCTGAGCCATG	5	4e-05	0
GAATGGCACAGAAGGCCCTAACTTCTACGTGCCCTTCTCCAAT-----------------------------GTACCCACAGTACTACCTGGCTGAGCCATG	5	4e-05	0
GAATGGCACAG-AGGCCCTAACTTCTACGTGCCCTTCTCCAATGCGATGGGTGTGGTACGCAGCCCCTTCGAGTACCCACAGTACTACCTGGCTGAGCCATG	5	4e-05	0
GAATGGCACAGAAGGCCCTAACTTCTACGTGCCCTTCTCCAATGCGATGGGTGTGGTACGCAGCCCCTTCGAGTACCCACAGTACTACCTGGCTGCGCCATG	5	4e-05	0
GAATGGCACAGAAGGCCCTAACTTCTACGTGCCCTTCTCCAATGCGACGGGGGTGGTACGCAGCCCCTTCGAGTACCCACAGTACTACCTGGCTGAGCCATG	5	4e-05	0
GAATGGCACAGAAGGCCCTAACTTCTACGTGCCCTTCTCCAATGCGACGGGTGTGGTACCCAGCCCCTTCGAGTACCCACAGTACTACCTGGCTGAGCCATG	5	4e-05	0
GAATGGCACAGAAGGCCCTAACTTCTACGTGCCCTTCTCCAATG-----------------------TTCGAGTACCCACAGTACTACCTGGCTGAGCCATG	5	4e-05	0
GAATGGCACAGAAGGCCCTAACTTCTACGTGCCCTTCTCCAATGCGATGGGTGTGGTACGCAGCCCCTTCGAGTACCCACAGTACTACCTTGCTGAGCCATG	5	4e-05	0
GAATGGCACAGAAGGCCCTAACTTCTACGTGCCCTTCTCCAATGCGATGGGTGTGGTACGCAGCCCCTTCGAGTACCCACAGTACTACCTGGCTGAGCCATG	5	4e-05	44AT
GAATGGCACAGAAGGCCCTAACTTCTACGTGCCCTTCTCCAATGCGATGGGTGTGGTACGCAGCCCCTTCGAGTACCCACAGTACTACCTGGCTGAGCCATG	5	4e-05	50GT
GAATGGCACAGAAGGCCCTAACTTCTACGTGCCCTTCTCCAATGCGATGGGTGTGGGACGCAGCCCCTTCGAGTACCCACAGTACTACCTGGCTGAGCCATG	5	4e-05	0
GAATGGCACAGAAGGCCCTAACTTCTACGTGCCC----------------------TACGCAGCCCCTTCGAGTACCCACAGTACTACCTGGCTGAGCCATG	5	4e-05	0
GAATGGCACAGAAGGGCCTAACTTCTACGTGCCCTTCTCCAATGCGATGGGTGTGGTACGCAGCCCCTTCGAGTACCCACAGTACTACCTGGCTGAGCCATG	5	4e-05	0
GAACGGCACAGAGGGCCCTAACTTCTACGTGCCCTTCTCCAATGCGATGGGTGTGGTACGCAGCCCCTTCGAGTACCCACAGTACTACCTGGCTGAGCCATG	5	4e-05	0
GAATGGCACAGAAGGCCCTAACTTCTACGTGCCCTTCTCCAATGCG-TGGGTGTGGTACGCAGCCCCTTCGAGTACCCACAGTACTACCTGGCTGAGCCATG	5	4e-05	0
GAATGGCACAGAAGGCCCTAACTTCTACGTGCC-----------CGATGGGTGTGGTACGCAGCCCCTTCGAGTACCCACAGTACTACCTGGCTGAGCCATG	5	4e-05	0
GAATGGCACAGAAGGCCCTAACTTCTACGTGCCCTTCTCCAATGCGACGGGTGTGGTACGCAGCCCCTTCGAGTACCCACAGTACTACTTGGCTGAGCCATG	5	4e-05	0
GAATGGCACAGAAGGCCCTAACTTCTACGTGCCCTTCTCCAATGCGACGGATGTGGTACGCAGCCCCTTCGAGTACCCACAGTACTACCTGGCTGAGCCATG	5	4e-05	0
GAATGGCACAGAAGGCCCTAACTTCTACGTGCCCTTCTCCAATGCGATGGGTGTGGTACGCAGCCCCTTCGAGTACCCACAGTACTTCCTGGCTGAGCCATG	5	4e-05	0
GAATGGCACAGAAGGCCCTAACTTCTACGTGCCCTTCTCCAATGCGACGGGTGTGGTACGCAGCCCATTCGAGTACCCACAGTACTACCTGGCTGAGCCATG	5	4e-05	0
GAATGGCACAGAAGGCCCTAACTTCTACGTGCCCTTCTCCAATGCGACGGGTGTGGTACGCAGTCCCTTCGAGTACCCACAGTACTACCTGGCTGAGCCATG	5	4e-05	0
GAATGGCACAGAAGGCCCTAACTACTACGTGCCCTTCTCCAATGCGATGGGTGTGGTACGCAGCCCCTTCGAGTACCCACAGTACTACCTGGCTGAGCCATG	5	4e-05	0
GAATGGCACAGAAGGCCCTAACTTCTACGTGCCCTTCTCCAATGCGATGGGTGTGGTACGCTGCCCCTTCGAGTACCCACAGTACTACCTGGCTGAGCCATG	5	4e-05	0
GAATGGCACAGAAGGCCCTAACTTCTACGTGCCCTTCTCCAATGCGATGGGTGTGGTACGCAGCCCCTTCGAGTACCCACAGTACTACCTGGCTCAGCCATG	5	4e-05	0
GAATGGCATAGAAGGCCCTAACTTCTACGTGCCCTTCTCCAATGCGACGGGTGTGGTACGCAGCCCCTTCGAGTACCCACAGTACTACCTGGCTGAGCCATG	5	4e-05	0
GAATGGCACAGAAGGCCCTAACTTCTACGTGCCCTTCTCCAATGCGATGGGTGTGGTACGCAGACCCTTCGAGTACCCACAGTACTACCTGGCTGAGCCATG	5	4e-05	0
GAATGGCACAGAAGGCCCTAACTTCTACGTGCCCTTCTCCAA-------------GTACGCAGCCCCTTCGAGTACCCACAGTACTACCTGGCTGAGCCATG	5	4e-05	0
GAATGGCACAGAAGGCCCTAACTTCTACGTGCCCTTCTCC-------TGGGTGTGGTACGCAGCCCCTTCGAGTACCCACAGTACTACCTGGCTGAGCCATG	5	4e-05	0
GAATGGCACAGAAGGCCCTAACTTCTACGTGCCCTTCTCCAATGCGACGGGTGTGGTACGCAGCCCCTTCGAGTACCCACATTACTACCTGGCTGAGCCATG	4	3e-05	0
GAATGGCACAGAAGGCCCTAACTTCTACGTGCCC-------------TGGGTGTGGTACGCAGCCCCTTCGAGTACCCACAGTACTACCTGGCTGAGCCATG	4	3e-05	0
GAATGGCACAGAAGGCCCTAACTTCTACGTGCCCTTCTCCAATGCGATGGGCGTGGCACGCAGCCCCTTCGAGTACCCACAGTACTACCTGGCTGAGCCATG	4	3e-05	0
GAATGGCACACAAGGCCCTAACTTCTACGTGCCCTTCTCCAATGCGATGGGTGTGGTACGCAGCCCCTTCGAGTACCCACAGTACTACCTGGCTGAGCCATG	4	3e-05	0
GAATGGCACAGAAGGCCCTAACTTCTACGTGCCCTTCTCCAATGCGATGGGTGTGGTACGCAGCCCCTTCGAGTACCCACAGTACTACCTGGCTGAGCCATG	4	3e-05	42G
GAATGGCACAGAAGGCCCTAACTTCTACGTGCCCTTCTCCAATGCGACGGGTGTGGTACGCAGCCCCTTCGAGTACCCACAGTACTACCTGGCCGAGCCATG	4	3e-05	0
GAATGGCACAGAAGGCCCTAACTTCTACGTGCCCTTCTCCAATGCGATGGGTGTGGTACGCAGCCCCTTCGAGTACCCACAGTACTACCTGGCTGAGCCATG	4	3e-05	44GGTCGCCCGGCCTCAGTGAGCGAGCGAGCGCGCAGAGAGGGAGTGGCCAACTC
GAATGGCACAGAAGGCCCTAACTTCTACGTGCCCTTCTCCAATGCGACGGGTGTGGTACGCAGCCCCTTCGAGTACCCATAGTACTACCTGGCTGAGCCATG	4	3e-05	0
GAATGGCACAGAAGGCCCTAACTTCTAAGTGCCCTTCTCCAATGCGATGGGTGTGGTACGCAGCCCCTTCGAGTACCCACAGTACTACCTGGCTGAGCCATG	4	3e-05	0
GAACGGCACAG-AGGCCC-AA-TT-TATGTGCCCTTCTCCAA--CGA--GGCGTGGTACGCAGCCCCTTCGAGTACCCACAGTACTACCTGGCTGAGCCATG	4	3e-05	14GC22TT44TCAC
GAATGGCACAGAAGGCCCTAACTTCTACGTGCCCTTCTCCAATGCGACGGGTGTGGTACGCAGCCCCTTCGAGTACCCACAGTACTACCTGGTTGAGCCATG	4	3e-05	0
GAATGGCACAGAAGGCCCTAAC-------------------------------TGGTACGCAGCCCCTTCGAGTACCCACAGTACTACCTGGCTGAGCCATG	4	3e-05	0
GAACGGCACAG-AGGCCC-AA-TT-TATGTGCCCTTCTCCAA--CGA--GGCGTGGT--GCAGCCCCTTCGAGTACCC--AGTACTACCTGGC-GA-CCATG	4	3e-05	14GC22TT44TCAC59GG75G78G94GA
GAATGGCACAGAAGGCCCT-------------------------CGATGGGTGTGGTACGCAGCCCCTTCGAGTACCCACAGTACTACCTGGCTGAGCCATG	4	3e-05	0
GAATGGCACAGAAGGCCCTAACTTCTACGTGCCCTTCTCCAAT-CGATGGGCGTGGTACGCAGCCCCTTCGAGTACCCACAGTACTACCTGGCTGAGCCATG	4	3e-05	0
GAATGGCACAGAAGGCCCTAACTTCTACGTGCCCTTCTCCAAT--GATGGGTGTGGTACGCAGCCCCTTCGAGTACCCACAGTACTACCTGGCTGAGTCATG	4	3e-05	0
GAATGGCACAGAAGGCCCTAACTTCTACGTGCCCTTCTCCAATGCGATGGGTGTGGTACGCAGCCCCTTCGACTACCCACAGTACTACCTGGCTGAGCCATG	4	3e-05	0
GAATGGCACAGAAGGCCCTAACTTCTACGTGCCC---------GCGATGGGTGTGGTACGCAGCCCCTTCGAGTACCCACAGTACTACCTGGCTGAGCCATG	4	3e-05	0
GAATGGCACAGAAGGCCCTAACTTCTTCGTGCCCTTCTCCAATGCGATGGGTGTGGTACGCAGCCCCTTCGAGTACCCACAGTACTACCTGGCTGAGCCATG	4	3e-05	0
GAATGGCACAGAAGGCCCTAACTTCTACGTGCCCTTCTCCAATGC------TGTGGTACGCAGCCCCTTCGAGTACCCACAGTACTACCTGGCTGAGCCATG	4	3e-05	0
GAATGGCACAGAAGGCCCTAACTTCTACGTGCCCTTCTCCAATGCGATGGGTGTGGTACGCAGCGCCTTCGAGTACCCACAGTACTACCTGGCTGAGCCATG	4	3e-05	0
GAATGGCACAGAAGGCCCTAACTTCTACGTGCCCTTCTCCAATGCGATGGGTGTGGTACGCAGCCCCTTCGAGTACCCACAGTACTACCTCGCTGAGCCATG	4	3e-05	0
GAATGGCACAGAAGGCCCTAACTTCTACGTGC------------CGATGGGTGTGGTACGCAGCCCCTTCGAGTACCCACAGTACTACCTGGCTGAGCCATG	4	3e-05	0
GAATGGCACAGAAGGCCCTAACTTCTACGTGCCCTTCTCCAATGCGACGGGTGTGCTACGCAGCCCCTTCGAGTACCCACAGTACTACCTGGCTGAGCCATG	4	3e-05	0
GAATGGCACAGAAGGCCCTAACTTCTACGTGCCCTTCT-CAA--CGATGGGTGTGGTACGCAGCCCCTTCGAGTACCCACAGTACTACCTGGCTGAGCCATG	4	3e-05	0
GAATGGCACAGAAGGCCCTAACTTC-------------------------------TACGCAGCCCCTTCGAGTACCCACAGTACTACCTGGCTGAGCCATG	4	3e-05	0
GAATGGCATAGAAGGCCCTAACTTCTACGTGCCCTTCTCCAAT-CGATGGGTGTGGTACGCAGCCCCTTCGAGTACCCACAGTACTACCTGGCTGAGCCATG	4	3e-05	0
GAATGGCACAGAAGGCCCTAACTTCTACGTGCCCTTCTCCAAT-CGATGGGTGTGGTACGCAGCCCCTTCAAGTACCCACAGTACTACCTGGCTGAGCCATG	4	3e-05	0
GAATGGCACAGAAGGCCCTAACTTCTACGTGCCCTTCTACAATGCGACGGGTGTGGTACGCAGCCCCTTCGAGTACCCACAGTACTACCTGGCTGAGCCATG	4	3e-05	0
GAATGGCACAGAAGGCCCTAACTTCTACGTGCCCTTCTCCAATGCGACGGGTGTGGTACGCAGCCCCTTCGAGTACCCACAGTACTACCTGTCTGAGCCATG	4	3e-05	0
GAATGGCACAGAAGGCCCTAACTTCTACGTGCCCTTC------GCGATGGGTGTGGTACGCAGCCCCTTCGAGTACCCACAGTACTACCTGGCTGAGCCATG	4	3e-05	0
GAATGGCACAGAAGGCCCTAACTTCTACGTGCCCTTCTCCAATGCGACGGGTGTGTTACGCAGCCCCTTCGAGTACCCACAGTACTACCTGGCTGAGCCATG	4	3e-05	0
GAATGGCACAGAAGGCCCTAACTTCTACGTGCCCTTCTCC-------------TGGTACGCAGCCCCTTCGAGTACCCACAGTACTACCTGGCTGAGCCATG	4	3e-05	0
GAATGGCACAGAAGGCCCTAACTTCTACGTGCCCTTCTCCAATGCGATGGGTGTGGTACGCAGCCCCTTCGAGTACCCACAGTACTACCTGGCTGAGCCATG	4	3e-05	41TTTGGTCGCCCGGCCTCAGTGAGCGAGCGAGCGCGCAGAGAGGG86G89GCCA
GAATGGCACAGAAGGCCCTAACTTCTACGTGCCCTTCTCCAATGCGACGGGTGTGGTACGCAGCCCCTTCGGGTACCCACAGTACTACCTGGCTGAGCCATG	4	3e-05	0
GAATGGCACAGAAGGCCCTAACTTCTACGTGCCCTTC-----------GGGTGTGGTACGCAGCCCCTTCGAGTACCCACAGTACTACCTGGCTGAGCCATG	4	3e-05	0
GAATGGCACAGAAGGCCCTAACTTCTACGCGCCCTTCTCCAATGCGACGGGTGTGGTACGCAGCCCCTTCGAGTACCCACAGTACTACCTGGCTGAGCCATG	4	3e-05	0
GAATGGCACAGAAGGCCCTAACTTCTACGTGCCCTTCTCCAATGCGACGGGTGTGGTACGCAGCCCCTTCGAGTACCCACAGTATTACCTGGCTGAGCCATG	4	3e-05	0
GAATGGCACAGAAGGCCCTAACTTCTACGTGCCCTTCTCCAATG---------------GCAGCCCCTTCGAGTACCCACAGTACTACCTGGCTGAGCCATG	4	3e-05	0
GAATGGCACAGAAGGCCCTAACTTCTACGTGCCCTTCTCCAATGCGATGGGTGTGGTACGCAGCCCCTTCGAGTACCCACAGTACTACCT-GCTGAGCCATG	4	3e-05	0
GAATGGCACAGAAGGCCCTAACTTCTACGTGCCCTTCTCGAATGCGATGGGTGTGGTACGCAGCCCCTTCGAGTACCCACAGTACTACCTGGCTGAGCCATG	4	3e-05	0
GAATGGCACAGAAGGCCCTAACTTCTACGTGCCCTTCTCCAA--CGATGGGTGTGGTACGCAGTCCCTTCGAGTACCCACAGTACTACCTGGCTGAGCCATG	4	3e-05	0
GAATGGCACAGAAGGCCCTAACTTCTACGTGCCCTTCTCCAATGCGATGGGTGTGGTACGCAGCCCCTTCGAGTACCCACAGTACTACCTGGCTGAGCCAT-	4	3e-05	0
GAATGGCACAGAAGGCCCTAACTTCTACGTGCCCTTCTCCAATGCGATGGGTGTGGTACGCAGCCCCTTCGAGTACCCACAGTACTACCTGGCTGAGCCATG	4	3e-05	43GACCAAAGGTCGCCCGACGCCCGGGCTTTGCCCGGGCGGCCTCAGTGAGCGAGCGAGCGC
GAATGGCACAGAAGGCCCTAACTTCTACGTGCCCTTCTCCAATGCGACGGGTGTGGTACGCATCCCCTTCGAGTACCCACAGTACTACCTGGCTGAGCCATG	4	3e-05	0
GAATGGCACAGAAGGCCCTAACTTCTACGTGCCCTTCTCCAATGCGATGGGTGTGGTACGCAGCCCCTTCGAGTACCCACAGTACTACCTGGCAGAGCCATG	4	3e-05	0
GAATGGCACAGAAGGCCCTAACTTCTACGTGCCCTTCTCCAATGCGATGGGTGTGGTACGCAGCCCCTTCGAGTACCCACAGTACTACCTGGCTGAGCCATG	4	3e-05	45G
GAATGGCACAGAAGGCCGTAACTTCTACGTGCCCTTCTCCAATGCGATGGGTGTGGTACGCAGCCCCTTCGAGTACCCACAGTACTACCTGGCTGAGCCATG	4	3e-05	0
GAATGGCACAGAAGGCCCTAACTTCTACGTGCCCTTCTCCAAT-CGATGGGTGTGGTATGCAGCCCCTTCGAGTACCCACAGTACTACCTGGCTGAGCCATG	4	3e-05	0
GACTGGCACAGAAGGCCCTAACTTCTACGTGCCCTTCTCCAATGCGACGGGTGTGGTACGCAGCCCCTTCGAGTACCCACAGTACTACCTGGCTGAGCCATG	4	3e-05	0
GAATGGCACAGAAGGCCCTAACTTCTACGTGCCCTTCTCCAATGCGATGGGTGTGGTACGCAGCCCCTTCGAGTACCCACAGTACTACCGGGCTGAGCCATG	4	3e-05	0
GAATGGCACAGAAGGCCCTAACTTCTACGTGCCCTTCTCC---------GGTGTGGTACGCAGCCCCTTCGAGTACCCACAGTACTACCTGGCTGAGCCATG	4	3e-05	0
GAATGGCACAGAAGGCCCTAACTTCTACGTGCCCTTCTCCAATGCGACGGGTGTGGTACGCAGCCCCTTCGAGTACCCACAGTACTACCTGGCTGAGCCATG	4	3e-05	43G
GAATGGCACAGAAGGCCCTAACTTCTACGTGCCCTTCTCCAATG-GATGGGTGTGGCACGCAGCCCCTTCGAGTACCCACAGTACTACCTGGCTGAGCCATG	4	3e-05	0
GAATGGCACAGAAGGCCCTAACTTCTACGTGCCCTTCTCCAATGCGATGGGTGTGGTACGCAGCCCCTTCGAGTACCCACAGTACTACCTGGCTGAGCCATG	4	3e-05	44GT
GAATGGCACAGAAGGCCCTAACTTCTACGTGCCCTTCTGCAATGCGATGGGTGTGGTACGCAGCCCCTTCGAGTACCCACAGTACTACCTGGCTGAGCCATG	4	3e-05	0
GAATGGCACAGAAGGCCCTAACTTCTACGTGCCCTTATCCAATGCGACGGGTGTGGTACGCAGCCCCTTCGAGTACCCACAGTACTACCTGGCTGAGCCATG	4	3e-05	0
GAATGGCACAGAAGGCCCTAACTTCTACGTGCCCTTCTCCAATGCGATGGGTGTGGTACGCAGCCCCTTCGAGTACCCACAGTACTACCTGGCTGAGCCATG	4	3e-05	44GCCCGGCCTCAGTGAGCGAGCGAGCGCGCAGAGAGGGAGT
GAATGGCACAAAAGGCCCTAACTTCTACGTGCCCTTCTCCAAT-CGATGGGTGTGGTACGCAGCCCCTTCGAGTACCCACAGTACTACCTGGCTGAGCCATG	4	3e-05	0
GAATGGCACAGAAGGCCCTAACTTCTACGTGCCCTTCTCCAATG-------------------------CGAGTACCCACAGTACTACCTGGCTGAGCCATG	4	3e-05	0
GAATGGCACAGAAGGCCCTAACTTCTACGTGGCCTTCTCCAATGCGATGGGTGTGGTACGCAGCCCCTTCGAGTACCCACAGTACTACCTGGCTGAGCCATG	4	3e-05	0
GAATGGCACAGAAGGCCCTAACTTCTACGTGCCCTTCTCCAATGCGACGGGTGTGGTACGCAGCCCCTTCGAATACCCACAGTACTACCTGGCTGAGCCATG	4	3e-05	0
GAATGGCACAGAAGGCCCTAACTTCTACGTGCC-----CC----CGATGGGTGTGGTACGCAGCCCCTTCGAGTACCCACAGTACTACCTGGCTGAGCCATG	4	3e-05	0
GAATGGCACAGAAGGCCCTAACTTCTACGTGCCCTTCTCCAA--CGATGGGTGTGGTACGCAGCCCCTTCGAGTACCCACAGTACTACCTGGCTGAGCCATG	4	3e-05	43C
GAATGGCACAGAAGGCCCTAACTTCTACGTGCCCTTCTCCAATGCGACGGGTGTGGTACGCAGCCCCTTCGAGTACCCACGGTACTACCTGGCTGAGCCATG	4	3e-05	0
GAATGGCACAGAAGGCCCTAACTTCTACGTGTCCTTCTCCAAT-CGATGGGTGTGGTACGCAGCCCCTTCGAGTACCCACAGTACTACCTGGCTGAGCCATG	4	3e-05	0
GAATGGCACAGGAGGCCCTAACTTCTACGTGCCCTTCTCCAATGCGACGGGTGTGGTACGCAGCCCCTTCGAGTACCCACAGTACTACCTGGCTGAGCCATG	4	3e-05	0
GAATGGCACAGAAGGCCCTAACTTCTACGTGCCCTTCTCCAAT-CGATGGGTGTGGTACGCAGCCCCTTCGAGCACCCACAGTACTACCTGGCTGAGCCATG	4	3e-05	0
GAATGGCACAGAAGGCCCTAACTTCTACGTGCCCTTCTCCAAT----TGGGTGTGGTACGCAGCCCCTTCGAGTACCCACAGTACTACCTGGCTGAGCCATG	4	3e-05	42T
GAATGGCACAGAAGGCCCTAACTTCTACGTGCCCTTCTCCAATGCGATGGGTGTGGTACCCAGCCCCTTCGAGTACCCACAGTACTACCTGGCTGAGCCATG	4	3e-05	0
GAATGGCACAGAAGGCCCTAACTTCTACGTGCCCTTCTCCAATGC--TGGGTGTGGTACGCAGCCCCTTCGAGTACCCACAGTACTACCTGGCTGAGCCATG	4	3e-05	46AC
GAATGGCACAGAAGCCCCTAACTTCTACGTGCCCTTCTCCAATGCGATGGGTGTGGTACGCAGCCCCTTCGAGTACCCACAGTACTACCTGGCTGAGCCATG	4	3e-05	0
GAGTGGCACAGAAGGCCCTAACTTCTACGTGCCCTTCTCCAATGCGACGGGTGTGGTACGCAGCCCCTTCGAGTACCCACAGTACTACCTGGCTGAGCCATG	4	3e-05	0
GAATGGCACAGAAGGCCCTAACTTCTACGTGCCCTTCTCCAATGCGATGGGTGTGGTACGCAGCCCCTTCGAGTACCCACGGTACTACCTGGCTGAGCCATG	4	3e-05	43G
#NAME?	4	3e-05	0
GAACGGCACAG-AGGCCC-AA-TT-TATGTGCCCTTCTCCAA--CGA--GGCGTGGT--GCAGCCCCTTCGAGTACCCACAGTACTACCTGGCTGAGCCATG	4	3e-05	14GC22TT44TCAC59GG
GAACGGCACAG-AGGCCC-AA-TT-TATGTGCCCTTCTCCAA--CGA--GGCGTGGT--GCAGCCCCTTCGAG--CCCGCAGTACTACCTGGC-GA-CCATG	4	3e-05	14GC22TT44TCAA59GG74AG94GA
GAATGGCACAGAAGGCCCTAACTTCTACGTGCCCTTCTCCCATGCGATGGGTGTGGTACGCAGCCCCTTCGAGTACCCACAGTACTACCTGGCTGAGCCATG	4	3e-05	0
GAATGGCACAGAAGGCCCTAACTTCTACGTGCCCTTCTCCAA------------GGTACGCAGCCCCTTCGAGTACCCACAGTACTACCTGGCTGAGCCATG	4	3e-05	0
GAATGGCACAGAAGGCCCTAACTTCTACGTGCGCTTCTCCAATGCGATGGGTGTGGTACGCAGCCCCTTCGAGTACCCACAGTACTACCTGGCTGAGCCATG	3	3e-05	0
GAATGGCACAGAAGGCCCTAACTTCTACGTGCCCTTCTCCAATG-GATGGGTGTGGTACGCAGCCCCTTCGAGTACCCACAGTACTACCTGGCTGAGCCATG	3	3e-05	43C
GAATGGCACAGAAGGCCCTAACTTCTACGTGCCCTTCTCCAATG------------------------TCGAGTACCCACAGTACTACCTGGCTGAGCCATG	3	3e-05	0
GAATGGCACAGAAGGCCCTAACTTCTACGTGCCCTTCTCCAAT-CGATGGGTGTGGTACGCGGCCCCTTCGAGTACCCACAGTACTACCTGGCTGAGCCATG	3	3e-05	0
GAACGGCACAG-AGGCCC-AA-TT-TATGTGCCCTTCTCCAA--CGA--GGCGTGGT--GCAGCCCCTTCGAG--CCCGCAGTACTACCTGG-TGA-CCATG	3	3e-05	14GC22TT44TCAC59GG74AG94GA
GAATGGCACAGAAGGCCCTAACTTCTACGTGCCCTTCTCCAAT-CGATGGGTTTGGTACGCAGCCCCTTCGAGTACCCACAGTACTACCTGGCTGAGCCATG	3	3e-05	0
GAATGGCACAGAAGGCCCTAACTTGTACGTGCCCTTCTCCAATGCGATGGGTGTGGTACGCAGCCCCTTCGAGTACCCACAGTACTACCTGGCTGAGCCATG	3	3e-05	0
GAACGGCACAG-AGGCCC--ACTT-TATGTGCCCTTCTCCAA--CGA--GGCGTGGT--GCAGCCCCTTCGAG--CCCGCAGTACTACCTGGC-GA-CCATG	3	3e-05	14GC21TT44TCAC59GG74AG94GA
GAATGGCACAGAAGGCCCTAACTTCTACGTGCCCTTCTCCAATG--------------------------GAGTACCCACAGTACTACCTGGCTGAGCCATG	3	3e-05	0
GAATGGCACAGAAGGCCCTAACTTCTACGTGCCCTTCTCCAAT----T-GGTGTGGTACGCAGCCCCTTCGAGTACCCACAGTACTACCTGGCTGAGCCATG	3	3e-05	0
GAATGGCACAGAAGGCCCTAACTTCTACG-------------TGCGATGGGTGTGGTACGCAGCCCCTTCGAGTACCCACAGTACTACCTGGCTGAGCCATG	3	3e-05	0
GAATGGCACAGAAGGCCCTAACTTCTACGTGCCCTTCTCCAATG---T--GTGTGGTACGCAGCCCCTTCGAGTACCCACAGTACTACCTGGCTGAGCCATG	3	3e-05	0
GAATGGCACAGAAGGCCCTAACTTCTACGTGCCCTTCTCCAAT-------------------GCCCCATCGAGTACCCACAGTACTACCTGGCTGAGCCATG	3	3e-05	0
GAATGGCACAGAAGGCCCTAACTTCTACGTGCCCTTCTCCAATGCGATGGGTGTGGTACGCAGCCCCTTCGAGTACCCACAGTACTACCTGGCTGAGCCATG	3	3e-05	44GA
GAATGGCACAGAAGGCCCTAACTTCTACGTGCCCTTCT-CAATGCGATGGGTGTGGTACGCAGCCCCTTCGAGTACCCACAGTACTACCTGGCTGAGCCATG	3	3e-05	0
GAATGGCACAGAAGGCCCTAACTTCTACGTGCCCTTCTCCAACGCGACGGGTGTGGTACGCAGCCCCTTCGAGTACCCACAGTACTACCTGGCTGAGCCATG	3	3e-05	0
GAATGGCACAGAAGGCCCTAACTTCTACGTGCCCTTCTCCAAT-CGATGGGTGTGGTACACAGCCCCTTCGAGTACCCACAGTACTACCTGGCTGAGCCATG	3	3e-05	0
GAATGGCACAGAAGGCCCTAACTTCTACGTGCCCTTCTCCAATGCGATGGGTGTGGTACGCAGCCCCTTCCAGTACCCACAGTACTACCTGGCTGAGCCATG	3	3e-05	0
GAACGGCACAG-AGGCCC-AA-TT-TATGTGCCCTTCTCCAA--CGA--GGCGTGGT--GCAGCCCCTTCGAG--CCCGCAGTACTACCCGGC-GA-CCATG	3	3e-05	14GC22TT44TCAC59GG74AG94GA
GAATGGCACAGAAGGCCCTAACTTCTACGTGCCCTTCTCCAA---------TGT-GTACGCAGCCCCTTCGAGTACCCACAGTACTACCTGGCTGAGCCATG	3	3e-05	0
GAATGGCACAGAAGGCCCTGACTTCTACGTGCCCTTCTCCAATGCGACGGGTGTGGTACGCAGCCCCTTCGAGTACCCACAGTACTACCTGGCTGAGCCATG	3	3e-05	0
GAATGGCACAGAAGGCCCTAACTTCTACGTGCCCTTCTCCAATGCGATGGGTGTGGTACGCAGCCCCTTCGAGTACCCACAGTACTACCTGGCTGAGCCATG	3	3e-05	44GTTGGTCGCCCGGCCTCAGTGAGCGAGCGAGCGCGCAGAGAGGGAGTGGCCAACTCCATCACTACTGCAGCTGGAACGGCTGAAGAAAGAC
GAATGGCACAGAAGGCCCTAACTTCTACGTGCCCTTCTTCAATG-GATGGGTGTGGTACGCAGCCCCTTCGAGTACCCACAGTACTACCTGGCTGAGCCATG	3	3e-05	0
GAATGACACAGAAGGCCCTAACTTCTACGTGCCCTTCTCCAAT-CGATGGGTGTGGTACGCAGCCCCTTCGAGTACCCACAGTACTACCTGGCTGAGCCATG	3	3e-05	0
GAACGGCACAG-AGGCCC-AA-TT-TATGTGCCCTTCTCCAA--CGA--GGCGTGGT--GCAGCCCCTTCGAG---CCACAGTACTACCTGGC-GA-CCATG	3	3e-05	14GC22TT44TCAC59GG74AG78G94GA
GAATGGCACAGAAGGCCCTAACTTCTACGTGCCCCTCTCCAAT-CGATGGGTGTGGTACGCAGCCCCTTCGAGTACCCACAGTACTACCTGGCTGAGCCATG	3	3e-05	0
GAATGGCACAGAAGGCCCTAACTTCTACGTGCCCTTCTCCAATGCGATGGGTGTGGTACGCAGCCCCTTCGAGTACCCACAGTACTACCTGGCTGAGCCATG	3	3e-05	44TT
GAATGGCACAGAAGGCCCTAACTTCTACGTGCCCTTCTCCAAT-CGATGGGTGTGGTACGCAGCCCCTTCGAGTACCCACAGTACTACCTGACTGAGCCATG	3	3e-05	0
GAATGGCACAGAAGGCCCTAACTTCTACCTGCCCTTCTCCAATGCGATGGGTGTGGTACGCAGCCCCTTCGAGTACCCACAGTACTACCTGGCTGAGCCATG	3	3e-05	0
GAATGGCACAGAAGGCCCTAACTTCTACGTGCCCTTCTCCAATG---------------------CCTTCGAGTACCCACAGTACTACCTGGCTGAGCCATG	3	3e-05	0
GAATGGCACAAAAGGCCCTAACTTCTACGTGCCCTTCTCCAATGCGACGGGTGTGGTACGCAGCCCCTTCGAGTACCCACAGTACTACCTGGCTGAGCCATG	3	3e-05	0
GAACGGCACAG-AGGCCC-AA-TT-TATGTGCCCTTCTCCAA--CGA--GGCGTGGT--GCAGCCCCTTCGA-T-CCCGCAGTACTACCTGGC-GA-CCATG	3	3e-05	14GC22TT44TCAC59GG74AG94GA
GAATGGCACAGAAGGCCCTAACTTCTACGTGCCCTTCTCCAATGCGATGGGTGTGGTACGCAACCCCTTCGAGTACCCACAGTACTACCTGGCTGAGCCATG	3	3e-05	43G
GAATGGCACAGAAGGCCCTAACTTCTACGTGCCCTTCTCCAATGCGATGGGTGTGGTACGCAGCCCCTTCGAGGACCCACAGTACTACCTGGCTGAGCCATG	3	3e-05	0
GAATGGCACAGAAGGCCCTAACTTCTACGTGCCCTTCTCCAATGC---GGGTGTGGTACGCAGCCCCTTCGAGTACCCACAGTACTACCTGGCTGAGCCATG	3	3e-05	44A
GAATGGCACAGAAGGCCCTAACTTCTACGTGCCCTTCTCCAAT-CGATGGGTGTGGTACGCAGCCCCTTCGAGTATCCACAGTACTACCTGGCTGAGCCATG	3	3e-05	0
GAATGGCACAGAAGGCCCTAACTTCTACGTGCCCTTCTCCAATGCGAT--GTGTGGTACGCAGCCCCTTCGAGTACCCACAGTACTACCTGGCTGAGCCATG	3	3e-05	47CG
GAATGGCACAGAAGGCCCTAACTTCTACGTGCCCTTCTCCAATGCGATGGGTGTGGTACGGAGCCCCTTCGAGTACCCACAGTACTACCTGGCTGAGCCATG	3	3e-05	0
GAAT-GCACAGAAGGCCCTAACTTCTACGTGCCCTTCTCCAATGCGATGGGTGTGGTACGCAGCCCCTTCGAGTACCCACAGTACTACCTGGCTGAGCCATG	3	3e-05	0
GAATGGCACAGAAGGCCCTAACTTCTACGAGCCCTTCTCCAATGCGACGGGTGTGGTACGCAGCCCCTTCGAGTACCCACAGTACTACCTGGCTGAGCCATG	3	3e-05	0
GAATGGCACAGAAGGCCCTAACTTCTACGTGCCCTTCTCCGATGCGACGGGTGTGGTACGCAGCCCCTTCGAGTACCCACAGTACTACCTGGCTGAGCCATG	3	3e-05	0
GAACGGCACAG-AGGCCC-AA-TT-TATGTGCCCTTCTCCA---CGA--GGCGTGGT--GCAGCCCCTTCGAG--CCCGCAGTACTACCTGGC-GA-CCATG	3	3e-05	14GC22TT40G44TCAC59GG74AG94GA
GAATGGCACAGAAGGCCCTAACTTCTACGTGCCCTTCTCCAATGCGATGGGTGTGGTACGCAGCCCCTTCGAGTACCCACAGTACTACCTGGCTGAGCCATG	3	3e-05	44CAA
GAATGGCACAGAAGGCCCTAACTTCTACGTGCCCTTCTCCAATG-GATGGGTGTGGTACGCAGCCCCTTCGAGTACCCACAGTACTACCTGGCTGAGCCATG	3	3e-05	45AG
GAATGGCACAGAAGGCCCTAACTTCTACGTGCCCTTCTCCAATGCGATGGGTGTGGTACGCAGCCCCTTCGAGTACCCACAGTACTACCTGGCTGAGCCATC	3	3e-05	0
GAATGGCACAGAAGGCCCTAACTTCTACGTGCCCT------------TGGGTGTGGTACGCAGCCCCTTCGAGTACCCACAGTACTACCTGGCTGAGCCATG	3	3e-05	0
GAACGGCACAG-AGGCCC-AA-TT-TATGTGCCCTTCTCCAA--CGA--GGCGTGGT--GCAGCCCCTTCGAG--CCCGCAGTACCACCTGGC-GA-CCATG	3	3e-05	14GC22TT44TCAC59GG74AG94GA
GAATGGCACAGAAGGCCCTAACTTCTACGTGCCCTTCTCCAA--------------------------------------------------CTGAGCCATG	3	3e-05	0
GAATGGCACAGAAGGCCCTAACTTCTACGTGCCCTTCTCCAATGCGATGGGTGTGGTACGCAGCCCCTTCGAGTACCGACAGTACTACCTGGCTGAGCCATG	3	3e-05	0
GAATGGCACAGAAGGCCCTAACTTCTACGTGCCCTTCTCCAATGCGATGGGTGTGGTACGCAGCCCCTTCGAGTACCCACAGTACTACCTGGCTGAGCCATG	3	3e-05	42GGTCGCCCGACGCCCGGGCTTTGCCCGGGCGGCCTCAGTGAGCGAGCGAGCGCGCAGAGAGGGAG
GAATGGCACAGAAGGCCCTAACTTCTACGT--------------CGATGGGTGTGGTACGCAGCCCCTTCGAGTACCCACAGTACTACCTGGCTGAGCCATG	3	3e-05	0
GAATGGCACGGAAGGCCCTAACTTCTACGTGCCCTTCTCCAATGCGACGGGTGTGGTACGCAGCCCCTTCGAGTACCCACAGTACTACCTGGCTGAGCCATG	3	3e-05	0
GAATGGCACAGAAGGCCCTAACGTCTACGTGCCCTTCTCCAATGCGATGGGTGTGGTACGCAGCCCCTTCGAGTACCCACAGTACTACCTGGCTGAGCCATG	3	3e-05	0
GAATGGCACAGAAGGCCCTAACTTCTACGTGCCCTTCTCCA----------------ACGCAGCCCCTTCGAGTACCCACAGTACTACCTGGCTGAGCCATG	3	3e-05	0
GAATGGCACAGAAGGCCCTAACTTCTACGTACCCTTCTCCAATGCGACGGGTGTGGTACGCAGCCCCTTCGAGTACCCACAGTACTACCTGGCTGAGCCATG	3	3e-05	0
GAATGGCACAGAAGGCCCTAACTTCTACGCGCCCTTCTCCAATG-GATGGGTGTGGTACGCAGCCCCTTCGAGTACCCACAGTACTACCTGGCTGAGCCATG	3	3e-05	0
GAATGGCACAGAAGGCCCTAACTTCTACGTGCCCTTCTCCAATGCGATGGGTGTGGTACGCAGCCCCTTCGAGTACCCACAGTACTACCTGGCTGAGCCATG	3	3e-05	43GCC
GAACGGCACAG-AGGCCC-AA-TT-TATGTGCCCTTCTCCAA--CGA--GGTGTGGTACGCAGCCCCTTCGAGTACCCACAGTACTACCTGGCTGAGCCATG	3	3e-05	14GC22TT44TCAC
GAATGGAACAGAAGGCCCTAACTTCTACGTGCCCTTCTCCAATGCGACGGGTGTGGTACGCAGCCCCTTCGAGTACCCACAGTACTACCTGGCTGAGCCATG	3	3e-05	0
GAATGGCACAGAAGGCCCTAACTTCTACGTGCCC-----------------TGTGGTACGCAGCCCCTTCGAGTACCCACAGTACTACCTGGCTGAGCCATG	3	3e-05	0
GAATGGTACAGAAGGCCCTAACTTCTACGTGCCCTTCTCCAATGCGACGGGTGTGGTACGCAGCCCCTTCGAGTACCCACAGTACTACCTGGCTGAGCCATG	3	3e-05	0
GAATGGCACAGAAGGCCCTAACTTCTACGTGCCCTTCTCCAATGCGATGGGTGTGGTACGCAGCCCCTTCGAGTACCCACAGTACTACCTGGCTGAGCCATG	3	3e-05	44CC
GAACGGCACAG-AGGCCC-AA-TT-TATGTGCCCTTCTCCAA--CGA--GGCGTGGT--GCAGCCCCTTCGAG--CCCGCAGTACTACCTG---GAGCCATG	3	3e-05	14GC22TT44TCAC59GG74AG94GAA
GAATGGCACAGAAGGCCCTAACTTCTACGTGCCCTTCTCCAATGCGATGGGTGTGGTACGCAGCCCCTTCGAGTACCCACAGTACTACCTGGCTGAGCCATG	3	3e-05	40TTGGTCGCCCGGCCTCAGTGAGCGAGCGAGCGCGCAGAG80GGG84G87GCCAAC
GAATGGCACAGAAGGCCCTAACTTCTACGTGCCCTTCTCCAAT----TGGGTGTGGTACGCAGCCCCTTCGAGTACCCACAGTACTACCTGGCTGAGCCATG	3	3e-05	0
GAATGGCACAGAAGGCCCTAACTTCTACGTGCCCTTCTCCAA--CGATGGGTGTGGTACGTAGCCCCTTCGAGTACCCACAGTACTACCTGGCTGAGCCATG	3	3e-05	0
GAACGGCACAG-AGGCCC-AA-TT-TATGTGCCCCTCTCCAA--CGA--GGCGTGGT--GCAGCCCCTTCGAG--CCCGCAGTACTACCTGGC-GA-CCATG	3	3e-05	14GC22TT44TCAC59GG74AG94GA
GAATGGCGCAGAAGGCCCTAACTTCTACGTGCCCTTCTCCAATGCGACGGGTGTGGTACGCAGCCCCTTCGAGTACCCACAGTACTACCTGGCTGAGCCATG	3	3e-05	0
GAATGGCACAGAAGGCCCTAACTTCTACGTGCCCTT------------------------CAGCCCCTTCGAGTACCCACAGTACTACCTGGCTGAGCCATG	3	3e-05	0
TAATGGCACAGAAGGCCCTAACTTCTACGTGCCCTTCTCCAAT-CGATGGGTGTGGTACGCAGCCCCTTCGAGTACCCACAGTACTACCTGGCTGAGCCATG	3	3e-05	0
GAATGGCACAGAAGGCCCTAACTTCTATGTGCCCTTCTCCAAT-CGATGGGTGTGGTACGCAGCCCCTTCGAGTACCCACAGTACTACCTGGCTGAGCCATG	3	3e-05	0
GAATGGCACAGAAGGCCCTAACTTCTACGTGCCCTTCTCCAATGCGATGGGTGTGGTACGCAGCCCCTTCGAGTACCCACAGTACTACCTGGCTGAGCCATG	3	3e-05	43GGG
GAATGGCACAGAAGGCCCTAACTTCTACGTGCCCTTCTCCA---------G-GTGGTACGCAGCCCCTTCGAGTACCCACAGTACTACCTGGCTGAGCCATG	3	3e-05	0
GAATGACACAGAAGGCCCTAACTTCTACGTGCCCTTCTCCAAT--GATGGGTGTGGTACGCAGCCCCTTCGAGTACCCACAGTACTACCTGGCTGAGCCATG	3	3e-05	0
GAATGGCACAGAAGGCCCTAACTTCTACGTGCCCTTCTCC----------GTGTGGTACGCAGCCCCTTCGAGTACCCACAGTACTACCTGGCTGAGCCATG	3	3e-05	0
GAATGGCACAGAAGGCCCTAACTTCTACGTGCCCTTCTCCAATGCGACGGGTGTGGTACGCGGCCCCTTCGAGTACCCACAGTACTACCTGGCTGAGCCATG	3	3e-05	0
GAATGGCACAGAAGGCCCTAACTTCTACGTGCCCTTCTCCAATGCGATGGGTGTGGTTCGCAGCCCCTTCGAGTACCCACAGTACTACCTGGCTGAGCCATG	3	3e-05	0
GAATGGCACAGAAGGCCCTAACTTCTACGTGCCCTTCTC-------------------CGCAGCCCCTTCGAGTACCCACAGTACTACCTGGCTGAGCCATG	3	3e-05	0
GAATGGCACAGAAGGCCCTAACTTCTACGTGCCCTTCTCCAATGCGATGGGTGTGGTACGCAGCCCCTTCGAGTACCCACAGTACTACCTGGCTGAGCCATG	3	3e-05	44AA
GAATGGCACAGAAGGCCCTAACTTCTACGTGCCCTTCTCCAATGCG--GGGTGTGGTACGCAGCCCCTTCGAGTACCCACAGTACTACCTGGCTGAGCCATG	3	3e-05	0
GAATGGCACAGAAGGCCCTAACTTCTACATGCCCTTCTCCAAT--GATGGGTGTGGTACGCAGCCCCTTCGAGTACCCACAGTACTACCTGGCTGAGCCATG	3	3e-05	0
GAATGGCACAGAAGGCCCTAACTTCTACGTGCCCTTCTCCAA----------------------CCCTTCGAGTACCCACAGTACTACCTGGCTGAGCCATG	3	3e-05	0
GAACGGCACAG-AGGCCC-AA-TT-TATGTGCCCTTCTCCAA--CGA---GTGTGGT--GCAGCCCCTTCGAG--CCCGCAGTACTACCTGGC-GA-CCATG	3	3e-05	14GC22TT44TCAC51C59GG74AG94GA
GAATGGCACAGAAGGCCCTAACTTCTACGTGCCCTTCTCCAATGCGATGGGTGTGGTACGCAGCCCCTTCGAGTACCCACAGTACTACCTGGCTGAGCCATG	3	3e-05	44CCCGGGCGTCGTCAGTGAGCGAGCGAGCGCGCA
GAATGGCACAGAAGGCCCTAACTTCTACGTGCCCTTCT-CAATGCGACGGGTGTGGTACGCAGCCCCTTCGAGTACCCACAGTACTACCTGGCTGAGCCATG	3	3e-05	0
GAATGGCACAGAAGGCCCTAACTTCTACGTGCCCTTCTCAAATGCGACGGGTGTGGTACGCAGCCCCTTCGAGTACCCACAGTACTACCTGGCTGAGCCATG	3	3e-05	0
GAATGGCACAGAAGGCCCTAACTTCTACGTGCCCTTCTCCAATGCGACGGGTGTGGTACGCAGCCCCTTCGAGTACCCACAGTACTACCTGGCTGAGCCTTG	3	3e-05	0
GAACGGCACAG-AGGCCC-AA-TT-TATGTGCCCTTCTCCAA--CGATGGG--TGGT--GCAGCCCCTTCGAG--CCCGCAGTACTACCTGGC-GA-CCATG	3	3e-05	14GC22TT44TC48A51C59GG74AG94GA
GAATGGCACAGAAGGCCCTAACTTCTACGTGCCCTTCTCCAATGCGATGGGTGTGGTACGCAGCCCCTTCGAGTACCCACAGTACTACCAGGCTGAGCCATG	3	3e-05	0
GAACGGCACAG-AGGCCC-AA-TT-TATGTGCCCTTCTCCAA--CGA--GGCGTGGT--GCAGCCCCTTCGAG--CCCACAGTACTACCTGGCTGAGCCATG	3	3e-05	14GC22TT44TCAC59GG74AG
GAATGGCACAGAAGGCCCTAACTTCTACGTGCCCTTCTCCAATGCGATGCGTGTGGTACGCAGCCCCTTCGAGTACCCACAGTACTACCTGGCTGAGCCATG	3	3e-05	0
GAATGGCACAGAAGGCCCTAACTTCTACGTGCCCTTC-----------------GGTACGCAGCCCCTTCGAGTACCCACAGTACTACCTGGCTGAGCCATG	3	3e-05	0
GAATGGCACAGAAGGCCCTAACTTCTACGTGCCCTTCTCCAATGCGATGGGTGTGGTACGCAGCCCCTTCGAGTACCCACAGTACTACCTGGCTGAGCCATG	3	3e-05	44G
GAATGGCACAGAAGGCCCTAACTTCTACGTGCCCTTCTCCAATTCGACGGGTGTGGTACGCAGCCCCTTCGAGTACCCACAGTACTACCTGGCTGAGCCATG	3	3e-05	0
GAATGGCACAGAAGGCCCTAACTTCTACGTGCCCTTCTCCAATGCGACGGGTGTGGTACGCAGCCCCTTCGAGTACCCACAGTACTACCTTGCTGAGCCATG	3	3e-05	0
GAATGGCACAGAAGGCCCTAACTTCTACGTGCCCTTCTCCAATGCGATGGGTGTGGTACGCAGCCCCTTCGAGTACCCACAGTACTACCTGGGTGAGCCATG	3	3e-05	0
GAATGGCACAGAAGGCCCTAACTTCTACGTGCCCTTCTCCAATGCGATGGGTGTGGTACGCAGCCCCTTCGAGTACCCACAGTACTACCTGGCTGAGCCATG	3	3e-05	61AGCCCCTTCG
GAATGGCACAGAAGGCCCTAACTTCTACGTGCCCTTCTCCAATGCGACGGGTGTGGTACGCAGCCCCCTCGAGTACCCACAGTACTACCTGGCTGAGCCATG	3	3e-05	0
GAATGGCACAGAAGGCCCTAACTTCTACGTGCCCTTCTCCAATGC----------GTACGCAGCCCCTTCGAGTACCCACAGTACTACCTGGCTGAGCCATG	3	3e-05	0
GAATGGCACAGAAGGCCCTAACTTCTACGTGCCCTTCTC---------GGGTGTGGTACGCAGCCCCTTCGAGTACCCACAGTACTACCTGGCTGAGCCATG	3	3e-05	0
GAATGGCACAGAAGGCCCTAACTTCTACGTGCCCTTCTCCAATGCGACGGGTGTGGTACGCAGCCCCTTTGAGTACCCACAGTACTACCTGGCTGAGCCATG	3	3e-05	0
GAATGGCACAGAAGGCCCTAACTTCTACGCGCCCTTCTCCAA--CGATGGGTGTGGTACGCAGCCCCTTCGAGTACCCACAGTACTACCTGGCTGAGCCATG	3	3e-05	0
GAATGGCACAGAAGGCCCTAACTTCTACGTGCCCTTCTCCAATGCGACGGGTGTGGTACGCAGCCCCTTCGAGTACCCACAGTACTACCTGGCTGAGCCATT	3	3e-05	0
GAATGGCACAGAAGGCCCTAACTTCCACGTGCCCTTCTCCAAT-CGATGGGTGTGGTACGCAGCCCCTTCGAGTACCCACAGTACTACCTGGCTGAGCCATG	3	3e-05	0
GAATGGCACAGAAGGCCCTAACTTCTACGTGCCCTTCTCCAATGCGATGGGTGTGGTACGCAGCCCC-TCGAGTACCCACAGTACTACCTGGCTGAGCCATG	3	3e-05	0
GAACGGCACAG-AGGCCC-AA-TT-TATGTGCCCTTCTCCAA--CGA--GGCGTGGT--GCAGCCCCTTCGAG--CCCGCAGTACTACCTGGCGGAGCCATG	3	3e-05	14GC22TT44TCAC59GG74AG
GAATGGCACAGAAGGCCCTAACTTCTACGTGCCCTTCTCCAA---------TGT--T-CGC-----------GTACCCACAGTACTACCTGGCTGAGCCATG	3	3e-05	0
GAATGGCACAGAAGGCCCTAACTTCTACGTGCCCTTCTCCAATGCGAGGGGTGTGGTACGCAGCCCCTTCGAGTACCCACAGTACTACCTGGCTGAGCCATG	3	3e-05	0
GAATGGCACAGAAGGCCCTAACTTCTACGTGCCCTTCTCCAATG-GATGGGTGTGATACGCAGCCCCTTCGAGTACCCACAGTACTACCTGGCTGAGCCATG	3	3e-05	0
GAATGGCACAGAAGGCCCTAACTTCTACGTGCCCTTCTCCAATGCGACGGGTGTGGTACGCAGCCCCTTCGAGTACCCACAGTACTACCTGGC-GA-CCATG	3	3e-05	94GA
GAGTGGCACAGAAGGCCCTAACTTCTACGTGCCCTTCTCCAATG-GATGGGTGTGGTACGCAGCCCCTTCGAGTACCCACAGTACTACCTGGCTGAGCCATG	3	3e-05	0
GAATGGCACAGAAGGCCCTAACTTCTACGTGCCCTTCTCCAAT-CGATGGGTGTGGTACGCAGCCCCTTCGAGTACCCACAGTACTGCCTGGCTGAGCCATG	3	3e-05	0
GAATGGCACAGAAGGCCCTAACTTCTACGTGCCCTTCTCCA--------GGTGTGGTACGCAGCCCCTTCGAGTACCCACAGTACTACCTGGCTGAGCCATG	3	3e-05	0
GAATGGCACAGAAGGCCCTAACTTCTACGTGCCCTTCTCCAATGCGACGGGTGTGGTACTCAGCCCCTTCGAGTACCCACAGTACTACCTGGCTGAGCCATG	3	3e-05	0
GAATGGCACAGAAGGCCCTAACTTCTACGTGCCCTTCTCCAATGCGATGGGTGTGGTACGCAGCCCCTTCGAGTACCCACAGTACTACCTGGCTGAGCCATG	3	3e-05	44GGC
GAATGGCACAGAAGGCCCTAACTTCTACGTGCCCTTCTCCAATGCGATGGCTGTGGTACGCAGCCCCTTCGAGTACCCACAGTACTACCTGGCTGAGCCATG	3	3e-05	0
GAATGGCACAGAAGGCCCTAACTTCTACGTGCCCTTCTCCTATGCGATGGGTGTGGTACGCAGCCCCTTCGAGTACCCACAGTACTACCTGGCTGAGCCATG	3	3e-05	0
GAATGGCACAGAAGGCCCTAAATTCTACGTGCCCTTCTCCAATGCGACGGGTGTGGTACGCAGCCCCTTCGAGTACCCACAGTACTACCTGGCTGAGCCATG	3	3e-05	0
GAATGGCACAGAAGGCCCTAACTTCTACGTGCCCTTCTCCAATGCGATGGGTGTGGTACGCAGCCCCTTCGAGTACCCACAGTACTACCTGGCTGAGCCATG	3	3e-05	67T
GAATGGCACAGAAGGCCCTAACTTCTACGTGCCCTTCTCCAATGCGATGGGTGTGGTACGCAGCCCCTTCGAGTACCCACAGTACTACCTGGCTGAGCCATG	3	3e-05	44TTGGCCACTCCCTCTCTGCGCGCTCGCT74CTC78C80GAGGCCGCCCGGGCAAAGCCCG
GAATGGCACAGAAGGCCCTAACTTCT------------------CGATGGGTGTGGTACGCAGCCCCTTCGAGTACCCACAGTACTACCTGGCTGAGCCATG	3	3e-05	0
GAATGGCACAGAAGGCCCTAACTTCTACGTGCCCTTCTCCAATGCGATGGGTGTGGTACGCAGCCCCTTCGAGTAGCCACAGTACTACCTGGCTGAGCCATG	3	3e-05	0
GAATGGCACAGAAGGCCCTAACTTCTACGTGCCCTTCTCCAATGCGATGGGTGTGGTACGCAGGCCCTTCGAGTACCCACAGTACTACCTGGCTGAGCCATG	3	3e-05	0
GAATGGCACAGAAGGCCCTAACTTCTACGTGCCCTTCTCCAATG----------------------CTTCGAGTACCCACAGTACTACCTGGCTGAGCCATG	3	3e-05	0
GAATGGCACAGAAGGCCCTAACTTCTACGTGCCCT------------------TGGTACGCAGCCCCTTCGAGTACCCACAGTACTACCTGGCTGAGCCATG	3	3e-05	0
GAATGGCACAGAAGGCCCTAACTTCTACGTGCCCTTCTCCAAT-CGATGGGTGTGGTACGCAGCCCCTTCGAGTACCCACAGTACTACCTGGCTGAGTCATG	3	3e-05	0
GAATGGCACAGAAGGCCCTAACTTCTACGTGCCCTTCTCCAAT-CGATGGGTGTGGTACGCAGCCCCTTCGAGTACCCACAGTACTACCTGGCTGAGCCATG	3	3e-05	40A
GAATGGCACAGAAGGCCCTAACTTCTACGTGCCCTTCTCCAAT-CGATGGGTGTGGTACGCAGCCCCTTCGAGTACCCACAGTACTACCTGGTTGAGCCATG	3	3e-05	0
GAATGGCACAGAAGGCCCTAACTTCTACGTGCCCTTCTCCAATGCGATGGATGTGGTACGCAGCCCCTTCGAGTACCCACAGTACTACCTGGCTGAGCCATG	3	3e-05	43G
TAATGGCACAGAAGGCCCTAACTTCTACGTGCCCTTCTCCAATGCGACGGGTGTGGTACGCAGCCCCTTCGAGTACCCACAGTACTACCTGGCTGAGCCATG	3	3e-05	0
GAATGGCACAGAAGGCCCTAACTTCTACGTGCCCTTCTCCAAT--GATGGGTGTGGTACGCAGCCCCTTCGAGTACCCACAGTACTACCTGGCTGAGCCATG	3	3e-05	42T
GAATGGCACAGAAGGCCCTAACTTCTACGTGCCCTTCTCCAATGCG--GGGTGTGGTACGCAGCCCCTTCGAGTACCCACAGTACTACCTGGCTGAGCCATG	3	3e-05	47CG
GAATGGCACAGAAGGCCCTAACTTCTACGTTCCCTTCTCCAATGCGACGGGTGTGGTACGCAGCCCCTTCGAGTACCCACAGTACTACCTGGCTGAGCCATG	3	3e-05	0
GAATGGCACAGAAGGCCCTAACTTCTACGTGCCCTTCTCCAATGCGATGGGTGTGGTACGCAGCCCCTTCGAGTCCCCACAGTACTACCTGGCTGAGCCATG	3	3e-05	0
GAATGGCACAGAAGGCCCTAACTTCTACGTGCCCTTCTCCAATGCGACGGGTGTGGTACGCAGCCCCTTCGAGTACCCACCGTACTACCTGGCTGAGCCATG	2	2e-05	0
GAATGGCACAGAAGGCCCTAACTTCTACGTGCCTTTCTCCAATGCGACGGGTGTGGTACGCAGCCCCTTCGAGTACCCACAGTACTACCTGGCTGAGCCATG	2	2e-05	0
GAATGGCACAGAAGGCCCTAACTTCTACGTGCCCTTCTCCAATGCGATGGGTGTGGTACGCAGCCCCTTCGAGTACCCACAGTACTACCTGGCTGGGCCATG	2	2e-05	44C
GAATGGCACAGAAGGCCCTAACTTCTACGTGCCCTTCTCCAATGCGATGGGTGTGGTACGCAGCCCCTTCGAGTACCCACAGTACTACCTGGCTGAGCCATG	2	2e-05	44GGCGACCTTTGGTCGCCCGGCCTCAGTGAGCGAGCGAGCGCGCAGAGAGGGAGTGGCCAACT
GAATGGCACAGAAGGCCCTAACTTCTACGTGCCCTTCTCCAAT--GATGGGTGTGGTACGCAGCCCCTTCGAGTACCCACAGTACTACCTGACTGAGCCATG	2	2e-05	0
GAATGGCACAGAAGGCCCTAACTTCTACGTGCCCTTCTCCAATGCGATGGGTGTGGTACGCAGCCCCTTCGAGTACCCACAGTACTACCTGGCTGAGCCATG	2	2e-05	43GGCCACTCCCTCTCTGCGCGCTCGCTCGCTCACTGAGGCCGGGCGACCAAAGGTCGCCCGACGCCC
GAATGGCACAGAAGGCCCTAACTTCTACTTGCCCTTCTCCAATGCGACGGGTGTGGTACGCAGCCCCTTCGAGTACCCACAGTACTACCTGGCTGAGCCATG	2	2e-05	0
GAATGGCACAGAAGGCCCTAACTTCTACGTGCCCTTCTCCAATGCGATGGGTGTGGTACGCAGCCCCTTCGAGTACCCACAGTACTACCTGGCTGAGCCATG	2	2e-05	44TATCTCGTCAACTTGTTGGCGAGATTTTTGCGGCCGCAGGAACCCCTAGTGATGGAGTTGGCCACTCCCTCTCTGCGCGCTCGCTCGCTCACTGAGGCCGCC
GAATGGCACAGAAGGCCCTAACTTCTACGTGCCCTTCTCCAATGCGATGGGTGTGGTACGCAGCCCCTTCGAGTACCCACAGTACTACCTGGCTGAGCGATG	2	2e-05	0
GAATGGCACAGAAGGCCCTAACTTCTACGTGCCCTTCTCCAATGCGATGGGTGTGGTACGCAGCCCCTTCGAGTACCCACAGTACTACCTGGCTGAGCCATG	2	2e-05	44TC
GAATGGAACAGAAGGCCCTAACTTCTACGTGCCCTTCTCCAAT-CGATGGGTGTGGTACGCAGCCCCTTCGAGTACCCACAGTACTACCTGGCTGAGCCATG	2	2e-05	0
GAATGGCACAGAAGGCC-------------------------------------------CAGCCCCTTCGAGTACCCACAGTACTACCTGGCTGAGCCATG	2	2e-05	0
GAATGGCACAGAAGGCCCTAACTTCTACGTGCCCTTCTCCAAT-CGATGGGTGTGGTACGTAGCCCCTTCGAGTACCCACAGTACTACCTGGCTGAGCCATG	2	2e-05	0
GAATGGCACAGAAGGCCCTAACTTCTACGTGCCCTTCTCCCAT-CGATGGGTGTGGTACGCAGCCCCTTCGAGTACCCACAGTACTACCTGGCTGAGCCATG	2	2e-05	0
GAATGGCACAGAAGGCCCTAACTTCTACGTGCCCTTCTCCAA--CGATGGGTGTGGTACGCAGCCCCTTCGAGTACCCACAGTACTACCTGGCTGAACCATG	2	2e-05	0
GAATGGCACAGAAGGCCCTAACTTCTACGTGCCCTTCTC-----CGATGTGTGTGGTACGCAGCCCCTTCGAGTACCCACAGTACTACCTGGCTGAGCCATG	2	2e-05	0
GAATGGCACAGAAGGCCCTAACTTCTACGTGCCCTTCTCCAATGCGACGGGTGTGGTACGCAGCCCCTTCGAGTTCCCACAGTACTACCTGGCTGAGCCATG	2	2e-05	0
GAATGGCACAGAAGGCCCTAACTTCTACGTGCCCTTCTCCAATGCGATGGGTGTGGTACGCAGCCCCTTCGAGTACCCACAGTACTACCTGGCTGGGCCATG	2	2e-05	43G
GGATGGCACAGAAGGCCCTAACTTCTACGTGCCCTTCTCCAAT-CGATGGGTGTGGTACGCAGCCCCTTCGAGTACCCACAGTACTACCTGGCTGAGCCATG	2	2e-05	0
GAATGGCACAGAAGGCCCTAACTTCTACGTGCCCTTCTCCAATGCGATGGGTGTGGTACGCAGCCCCTTCGAGTACCCACAGTACTACCTGGCTGAGCCATG	2	2e-05	44GGCCGGGCGGCCTCAGTGAGCGAGCGAGCGCGCAGAGAGGGAGTGGC
GAATGGCACAGAAGGCCCTAACTTCTACGTGCCCTTCTCCAATGCGA-GGGTGTGGTACGCAGCCCCTTCGAGTACCCACAGTACTACCTGGCTGAGCCATG	2	2e-05	0
GAACGGCACAG-AGGCCC-AA-TT-TATGTGCCCTTCTCCAATGCG-T-GGTGTGG-----AGCCCCTTCGAG--CCCGCAGTACTACCTGGC-GA-CCATG	2	2e-05	14GC22TT42CG45CACAG74AG94GA
GAATGGCACAGAAGGCCCTAACTTCTACGTGCCCTTCTCCAAT-CGATGGATGTGGTACGCAGCCCCTTCGAGTACCCACAGTACTACCTGGCTGAGCCATG	2	2e-05	0
GAATGGCTCAGAAGGCCCTAACTTCTACGTGCCCTTCTCCAAT-CGATGGGTGTGGTACGCAGCCCCTTCGAGTACCCACAGTACTACCTGGCTGAGCCATG	2	2e-05	0
GAATGGCACAGAAGGCCCTAACTTCTACGTGCCCTTCTCCAATGCGATGGGTGTGGTACGCAGCCCCTTCGAGTACCCACAGTACTACCTGGCTGTGCCATG	2	2e-05	43G
GAATGGCACAGAAGGCCCTAACTTCTACGTGCCCTT--------CGATGGATGTGGTACGCAGCCCCTTCGAGTACCCACAGTACTACCTGGCTGAGCCATG	2	2e-05	0
GAACGGCACAG-AGGCCC-AA-TT-TATGTGCCCTTCTCCAA--CGA--GGCGTGGT--GCAGCCCCCTCGAG--CCCGCAGTACTACCTGGC-GA-CCATG	2	2e-05	14GC22TT44TCAC59GG74AG94GA
GAATGGCACAGAAGGCCCTAACTTCTACGTGCCCTTCTCCAATGCGATGGGTGTGGTACGCAGCCCCTTCGAGTACCCACAGTACTACCTGGCTGAGCCATG	2	2e-05	44AAGCCCGGGCGTCGGGCGACCTTTGGTCGCCCGGCCTCAGTGAGCGAGCGAGCGCGCAGAGAGGGAGTGGCCAACTC
GAATGGCACAGAAGGCCCTAACTTCTACGTGCCCTTCTCCAATGCGATGGGTGTGGTACGCAGCCCCTTCGAGTACCCACAGTACTACCTGGCTGAGCCATG	2	2e-05	41GGTCGGGCGGCCTC56G59AGCGAGCGAGCGC
GAATGGCACAGAAGGCCCTAACTTC--CG-GCC--TCTCCAATGCGATGGGTGTGGTACGCAGCCCCTTCGAGTACCCACAGTACTACCTGGCTGAGCCATG	2	2e-05	23GG26CGC37AG40GAGCGAGCGAGCG54G57GAGAGGG65G68GCCAA
GAATGGCACAGAAGGCCCTAACTTCTACGTGCCCTTCTCCAATGCGATGGGTGTGGTACGCAGCCCCTTCGAGTACCCACAGTACTACCTGGCTGAGCCATG	2	2e-05	44TTGGCCACTCCCTCTCTGCGCGCTCGCTCGCTCACTGAGGCCGCGGC
GAATGGCACAGAAGGCCCTAACTTCTACGTGCCCTTCTCCAAT-CGATGGGTGCGGTACGCAGCCCCTTCGAGTACCCACAGTACTACCTGGCTGAGCCATG	2	2e-05	0
GAATGGCACAGAAGGCCCTAACTTCTACGTGCCCTTCTCCAATGCGACGGGTGTGGTACGCAGCCCCTTCGAGTACCCTCAGTACTACCTGGCTGAGCCATG	2	2e-05	0
GAATGGCACAGAAGGCCCTAACTTCTACGTGCCCTTCTCCAATGCGATGGATGTGGTACGCAGCCCCTTCGAGTACCCACAGTACTACCTGGCTGGGCCATG	2	2e-05	0
GAATGGCACAGAAGGCCCTAACTTCTACGTGCCCTTCTCCAATG----------------------------GTACCCACAGTACTACCTGGCTGAGCCATG	2	2e-05	0
GAATGGCACAGAAGGCCCTAACTTCTACGTGCCCTTCTCCAATGCGACGGGTGTGGAACGCAGCCCCTTCGAGTACCCACAGTACTACCTGGCTGAGCCATG	2	2e-05	0
GAATGGCACAGAAGGCCCTAACTTCTACGTGCCCTTCTCCAAT-CGATGGGGGTGGTACGCAGCCCCTTCGAGTACCCACAGTACTACCTGGCTGAGCCATG	2	2e-05	0
GAATGGCACAGAAGGCCCTAACTTCTAAGTGCCCTTCTCCAATGCGACGGGTGTGGTACGCAGCCCCTTCGAGTACCCACAGTACTACCTGGCTGAGCCATG	2	2e-05	0
GAATGGCACAGAAGGCCCTAACTTCTACGTGCCCTTCTCCAATGC-ATGGGTGTGGTACGCAGCCCCTTCGAGTACCCACAGTACTACCTGGCTGAGCCATG	2	2e-05	44TTGGC51CTCCCTCTC62CGC66CTC70C72C74CTCAC80GAGGCCGGGCGACCAAAG
GAATGGCACAGAAGGCCCTAACTTCTACGTGCCCT--------------------GTACGCAGCCCCTTCGAGTACCCACAGTACTACCTGGCTGAGCCATG	2	2e-05	0
GAATGGCACAGAAGGCCCTAACTTCTACGTGCCCTTCTCCAATGCGACGGGTGTGGTACGCAGCCCCTTCGAGTACCCACAGCACTACCTGGCTGAGCCATG	2	2e-05	0
GAATGGCACAGAAGGCCCTAACTTCTACGTGCCCTTCTCCAATGCGATGGGTGTGGTACGCAGCCCCTTCGAGTACCCACAGTACTACCTGGCTGAGCCATG	2	2e-05	44CGTCGCCCGGCCTCAGTGAGCGAGCGAGCGCGCAGAGAGGGAGTGGCCAAC
GGATGGCACAGAAGGCCCTAACTTCTACGTGCCCTTCTCCAATGCGACGGGTGTGGTACGCAGCCCCTTCGAGTACCCACAGTACTACCTGGCTGAGCCATG	2	2e-05	0
GAACGGCACAG-AGGCCC-AA-TT-TATGTGCCCTTCTCCAA--CGA--GGCGTGGT--GCAGCCCCTTCGAG--CCCGCAGTACTACCTGGC-GA-CCATG	2	2e-05	14TC22TT44TCAC59GG74AG94GA
GACTGGCACAGAAGGCCCTAACTTCTACGTGCCCTTCTCCAAT-CGATGGGTGTGGTACGCAGCCCCTTCGAGTACCCACAGTACTACCTGGCTGAGCCATG	2	2e-05	0
GAATGGCACAGAAGGCCCTAACTTCTACGTGCCCTTCTCCAAT-CGATGGGTGTGGTACGCAGCCCCTTCGAGTACCCACAGCACTACCTGGCTGAGCCATG	2	2e-05	0
GAATGGCACAGAAGGCCCTAACTTCTACGTGCCCTTCTCC-AT-CGATGGGTGTGGTACGCAGCCCCTTCGAGTACCCACAGTACTACCTGGCTGAGCCATG	2	2e-05	0
GAATGGCACAGAAGGCCCTAACTTCTACGTGCCCTTCTCCAATGCGATGGGTGTGGTACGCAGCCCCTTCGAGTACCCACAGTACTACCTGGCTGAGCCTTG	2	2e-05	43G
GAATGGCACAGAAGGCCCTAACTTCTACGTGCCCTTCTCCAATGCGACGGGTGTGGTACGCAGCCCCTTCGAGTACCCACAGTACTACCTGGCTGAGCCATA	2	2e-05	0
GAACGGCACAG-AGGCCC-AA-TT-TATGTGCCCTTCTCCAA--CG-TGGGCGTGGT--GCAGCCCCTTCGAG--CCCGCAGTACTACCTGGC-GA-CCATG	2	2e-05	14GC22TT45CAC59GG74AG94GA
GAATGGCACAGAAGGCCCTAACTTCTACGTGCCCTTCTCCAATGCGATGGGTGTGGTACGCAGCCCCTTCGAGTACCCACAGTACTACCTGGCTGAGCCATG	2	2e-05	44GCGGCCTCAGTGAGCGAGCGAGCGCGC
GAATGGCACAGAAGGCCCTAACTTCTACGTGCCCTTCTCCAATGCGACGGGTGTGGTACGCAGCCCCTCCGAGTACCCACAGTACTACCTGGCTGAGCCATG	2	2e-05	0
GAACGGCACAG-AGGCCCT---TT-TATGTGCCCTTCTCCAA--CGA--GGCGTGGT--GCAGCCCCTTCGAG--CCCGCAGTACTACCTGGC-GA-CCATG	2	2e-05	14GC19GAT44TCAC59GG74AG94GA
GAATGGCACAGAAGGCCCTAACTTCTACGTGCCCTTCTCCAATGCGATGGGTGTGGTACGCAGCCCCTTCGAGTACCCACAGTACTACCTGGCTGAGCCATG	2	2e-05	43GAAA
GAATGGCACAGAAGGCCCTAACTTCTACGTGCCCTTCTCCAATGCGACGCGTGTGGTACGCAGCCCCTTCGAGTACCCACAGTACTACCTGGCTGAGCCATG	2	2e-05	0
GAATGGCACAGAAGGCCCTAACTTCTAC----------------CGATGGGTGTGGTACGCAGCCCCTTCGAGTACCCACAGTACTACCTGGCTGAGCCATG	2	2e-05	0
GAATGGCACAGAAGGCCCTAACTTCTACGTGCCCTTCTCCAATGCGACGGGTGTGGTACGCAGCCCCTTCGAGTACCCACAGTACTACCTGGCTGAGCCATG	2	2e-05	63C
GAATGGCACAGAAGGCCCTAACTTCTACGTGCCCTTCTCCACTGCGACGGGTGTGGTACGCAGCCCCTTCGAGTACCCACAGTACTACCTGGCTGAGCCATG	2	2e-05	0
GAATGGCACAGAAGGCCCTAACTTCTACGTGCCCTTCTCCAA--CGATGGGTGTGGTACGCAGCCCCTTCGAGTACCCACAGTACTACCTGGCTGGGCCATG	2	2e-05	0
GAATGGCACAGAAGGCCCTAACTTCTACGTGCCCTTCTCCAATGCGATGGGTGTGGTACGCAGCCCCTTCGAGTACCCACAGTACTACCTGGCTGAGCCATG	2	2e-05	42TGCGATGCGATGGGTG
GAATGGCACAGAAGGCCCTAACTTCTACGTGCCCTTCTCCAATGCGATGGGTGTGGTACGCAGCCCCTTCGAGTACCCACAGTACTACCTGGCTGAGCCATG	2	2e-05	44TGCGCGCTCGCTCGCTCACTGAGGCCGCC
GAATGGCACAGAAGGCCCTAACTCCTACGTGCCCTTCTCCAATGCGACGGGTGTGGTACGCAGCCCCTTCGAGTACCCACAGTACTACCTGGCTGAGCCATG	2	2e-05	0
GAATGGCACAGAAGGCCCTAACTTCTACGTGCCCTTCTCCAATGCGATGGGTGTGGTACACAGCCCCTTCGAGTACCCACAGTACTACCTGGCTGAGCCATG	2	2e-05	44T
GAATGGCACAGAAGGCCCTAACTTCTACGTGCCCTTCTCCAATG--------------------------------CCACAGTACTACCTGGCTGAGCCATG	2	2e-05	0
GAATGGCACAGAAGGCTCTAACTTCTACGTGCCCTTCTCCAATGCGACGGGTGTGGTACGCAGCCCCTTCGAGTACCCACAGTACTACCTGGCTGAGCCATG	2	2e-05	0
GAATGGCACAGAAGGCCCTAACTTCTACGTGCCCTTCTCCAATGCGATGGGTGTGGTACGCAGCCCCTTCGAGTACCCACAGTACTACCTGGCTGAGGCATG	2	2e-05	0
GAACGGCACAG-AGGCCC-AA-TT-TATGTGCCCTTCTCCAA--CGA-GGGTGTG---CGGAGCCCCTTCGAG--CCCGCAGTACTACCTGGC-GA-CCATG	2	2e-05	14GC22TT44TCAC51C55A74AG94GA
GAATGGCACAGAAGGCCCTAACTTCTACGTGCCCTTCTCCAAT-CGATGGGTGTGGTACGCAGCCCCTTCGAGTACCCACAGTACTACCTGGCTGAGCCGTG	2	2e-05	0
GAATGGCACAGAAGGCCCTAACTTCTACGTGCCCTTCTCCAATGCGACGGGTGTGGTGCGCAGCCCCTTCGAGTACCCACAGTACTACCTGGCTGAGCCATG	2	2e-05	0
GAACGGCACAG--GGCCCCAA-TT-TATGTGCCCTTCTCCAA--CGA--GGCGTGGT--GCAGCCCCTTCGAG--CCCGCAGTACTACCTGGC-GA-CCATG	2	2e-05	10GC22TT44TCAC59GG74AG94GA
GAATGGCACAGAAGGCCCTAACTTCTACGTGACCTTCTCCAATGCGACGGGTGTGGTACGCAGCCCCTTCGAGTACCCACAGTACTACCTGGCTGAGCCATG	2	2e-05	0
GAATGGCACAGAAGGCC---------------------------CGATGGGTGTGGTACGCAGCCCCTTCGAGTACCCACAGTACTACCTGGCTGAGCCATG	2	2e-05	0
GAATGGCACAGAAGGCCCTAACTTCTACGTGCCCTTCTCCAATGCGATGGGTGTGGTACGCAGCCCCTTCGAGTACGCACAGTACTACCTGGCTGAGCCATG	2	2e-05	0
GAATGGCACAGAAGGCCCTAACTTCTACGTGCCCTTCTCCAATGCGATGGGTGTGGTACGCAGCCCCTTCGAGTACCCACAGTACTACCTGGCTGAGCCATG	2	2e-05	44TTGCCCGGGCGGCCTCAGTGAGCGAGCGAGCGCGCAGAGAGGGAGTGGCCA
GAATGGCACAGAAGGCCCTAACTTCTACGTACCCTTCTCCAAT-CGATGGGTGTGGTACGCAGCCCCTTCGAGTACCCACAGTACTACCTGGCTGAGCCATG	2	2e-05	0
GAATGGCACAGAAGGCCCTAACCTCTACGTGCCCTTCTCCAAT-CGATGGGTGTGGTACGCAGCCCCTTCGAGTACCCACAGTACTACCTGGCTGAGCCATG	2	2e-05	0
GAATGGCACAGAAGGCCCTAACTTCTACGTGCCCTTCTCCAATG-GACGGGTGTGGTACGCAGCCCCTTCGAGTACCCACAGTACTACCTGGCTGAGCCATG	2	2e-05	0
GAATGGCACAGAAGGCCCTAACTTCTACGTGCCCTTCTCCAATGCGATGGGTGTGGTACGCAGCCCCTTCGAGTACCCACAGTACTACCTGGCTGAGCCATG	2	2e-05	44TTGGCCACTCCCTCTCTGCGCGCTCGCTCGCTCACTGAGGCCGCC91GGCAAAT
GAATGGCACAGAAGGCCCTAACTTCTACGTGCCCTTCT------CGATGGGCGTGGTACGCAGCCCCTTCGAGTACCCACAGTACTACCTGGCTGAGCCATG	2	2e-05	0
GAATGGCACAGAAGGCCCTAACTTCTACGTGCCCTTCTCCA----------TGTGGTACGCAGCCCCTTCGAGTACCCACAGTACTACCTGGCTGAGCCATG	2	2e-05	0
GAATGGCACAGAAGGCCCTAACTTCTACGTGCCCTTCTCCAATGCGATGGGTGTGGTACGCAGCCCCTTCGAGTACCCACAGTACTACCTGGCTGAGCCATG	2	2e-05	42AGGTCGCCCGACGCCCGGGCTTTGCCCGGGCGGCCTCAGTGAGCGAGCGAGCGCGCAGAGAGGGAG
GAATGGCACAGAAGGCCCTAACTTCTACGTGCCCTTCTCCAATGCGACGGGTGTGGTACGCAGCCCCTTCGAGTACCCACAGTACTAACTGGCTGAGCCATG	2	2e-05	0
GAATGGCACAGAAGGCCCTAACTTCTACGTGCCCTTCTCCAATGCGATGGGTGTGGTACGCAGCCCCTTCGAGTACCCACAGTACTACCTGGCTGAGTCATG	2	2e-05	43G
GAATGGCACAGAAGGCCCTAACTTCTACGTGCCCTTCTCCAATGCGATGGGTGTGGTACGCAGCCCCTTCGAGTACCCACAGTACTACCTGGCTGAGCCATG	2	2e-05	43GGATGGAGTTGGCCACTCCCTCTCTGCGCGCTCGCTCGCTCACTGAGGCCGCCCGGGCAAAGCCCGGGCGTCGG
GAATGGCACAGAAGGCCCTAACTTCTACGTGCCCTTCTCCAATGCGACGGGTGTGGTACGCAGCCCCTTCGAGTGCCCACAGTACTACCTGGCTGAGCCATG	2	2e-05	0
GAATGGCACAGAAGGCCCTAACTTCTACGTGCCCTTCTCCAATGCGATGGGTGTGGTACGCAGCCCCTTCGAGTACCCACAGTACTACCTGGCTGAGCCATG	2	2e-05	43GTTGGCCACTCCCTCTCTGCGCGCTCGCTCGCTCACTGAGGCCGG91ACCAAAA
GAATGGCACAGAAGGCCCTAACTTCTACGTGCCCTTCTCCAATGCGATGGGTGT-GTACGCAGCCCCTTCGAGTACCCACAGTACTACCTGGCTGAGCCATG	2	2e-05	0
GAATGGCACAGAAGGCCCTAACTTCTACGTGCCCTTCTCCAATGCGATGGGTGTGGTACGCAGCCCCTTCGAGTACCCACAGAACTACCTGGCTGAGCCATG	2	2e-05	0
GAACGGCACAG-AGGCCC-AA-TT-TATGTGCCCTTCTCCAA--CGA--GGCGTGGT--GCAGCCCCTTCGAG-ACCC--AGTACTACCTGGC-GA-CCATG	2	2e-05	14GC22TT44TCAC59GG74AG78G94GA
GAATGGCACAGAAGGCCCTAACTTCTACGTGCCCTTCTCCAATGCGACGGGTGTGGTACGCAGCCCCTTCGAGTACCCACAGTACCACCTGGCTGAGCCATG	2	2e-05	0
GAACGGCACAG-AGGCCC-AA-TTTTATGTGCCCTTCTCCAA--CGA--GGCGTGGT--GCAGCCCCTTCGAG--CCCGCAGTACTACCTGGC-GA-CCATG	2	2e-05	14GC43TCAC58GG73AG93GA
GAATGGCACAGAAGGCCCTAACTTCTACGTGCCCTTCTCCAATGCGACGGGTGTGGTACGCAGCCCCTTCCAGTACCCACAGTACTACCTGGCTGAGCCATG	2	2e-05	0
GAATGGCACAGAAGGCCCTAACTTCTACGTGCCCTTCTCCAATGCGATGGGTGTGGTACGCAGCCCCTTCGAGTACCCACAGTACTACCTGGCTGAGCCATG	2	2e-05	42AGCCCGGCCTCAGTGAGCGAGCGAGCGCGCAGAGAGGGAG84GCCA
GAATGGCACAGAAGGCCCTAACTTCTACGTGCCCTTC---------------------CGCAGCCCCTTCGAGTACCCACAGTACTACCTGGCTGAGCCATG	2	2e-05	0
GAATGGCACAGAAGGCCCTAACTTCTACGTGCCCTTCTCCAATGCGATGGGTGTGGTACGCAGCCCCTTCGAGTACCCACAGTACTACCTGGCTGAGCCATG	2	2e-05	44TGGCCACTCCCTCTCTGCGCGCTCGCTCGCTCACTGAGGCCGGGCGACCA
GAATGGCACAGAAGGCCCTAACTTCTACGTGCCCCTCTCCAATGCGACGGGTGTGGTACGCAGCCCCTTCGAGTACCCACAGTACTACCTGGCTGAGCCATG	2	2e-05	0
GAATGGCACAGAAGGCCCTAACTTCTACGTGCCCTTCTCCAATGCGACGGGTGTGGTACGCACCCCCTTCGAGTACCCACAGTACTACCTGGCTGAGCCATG	2	2e-05	0
GAATGTCACAGAAGGCCCTAACTTCTACGTGCCCTTCTCCAAT-CGATGGGTGTGGTACGCAGCCCCTTCGAGTACCCACAGTACTACCTGGCTGAGCCATG	2	2e-05	0
GAATGGCACAGAAGGCCCTAACTTCTACGTGCCCTTCTCCA--------------GTACGCAGCCCCTTCGAGTACCCACAGTACTACCTGGCTGAGCCATG	2	2e-05	0
GAATGGCACAGAAGGCCCTAACTTCTACGTGCCCTTCTCCAATGCGATGGGTGTGGTACGCAGCCCCTTCGAGTACCCACAGTACTACCTGGCTGAGCCATG	2	2e-05	44GAGTACAATCTGTTTGGAATGCAATGCTCAAACATGTGAATCCCACATGTTGTAATCATCTTGGGTGTTCTGTTTCAGGGCTAATATC
GAATGGCACAGAAGGCCC--------------------------CGATGGGTGTGGTACGCAGCCCCTTCGAGTACCCACAGTACTACCTGGCTGAGCCATG	2	2e-05	0
GAATGGCACAGAAGGCCCTAACTTCTACGTGCCCTTCTCCAATGCGACGGGAGTGGTACGCAGCCCCTTCGAGTACCCACAGTACTACCTGGCTGAGCCATG	2	2e-05	0
GAATGGCACAGAAGGCCCTAACTTCTACGAGCCCTTCTCCAA--CGATGGGTGTGGTACGCAGCCCCTTCGAGTACCCACAGTACTACCTGGCTGAGCCATG	2	2e-05	0
GAATGGCACAGAAGGCCCTAACTTCTACGTGCCCTTCTCCAATGCGATGGGTGTGGTACGCAGCCCCTTCGAGTACCCACAGTACTACCTGGCTGAGCCATG	2	2e-05	34GGCGACCT44GGTCGCCCGGC58AGTGAGCGAGCGAGCGCG78GAGAGGG86G89GCCA
GAATGGCACAGAAGGCCCTAACTTCTACGTGCCCTTCTCCA--------------------AGCCCCTTCGAGTACCCACAGTACTACCTGGCTGAGCCATG	2	2e-05	0
GAATGGCACAGAAGGCCCTAACTTCTACGTGCCCTTCTCCAATGCGATGGGTGTGGTACGCAGCCCCTTCGCGTACCCACAGTACTACCTGGCTGAGCCATG	2	2e-05	0
GAATGGCACAGAAGG-CCTAACTTCTACGTGCCCTTCTCCAATGCGACGGGTGTGGTACGCAGCCCCTTCGAGTACCCACAGTACTACCTGGCTGAGCCATG	2	2e-05	0
GAATGGCACAGAAGGCCCTAACTTCTACGTGCCCTTCTCCAATCCGATGGGTGTGGTACGCAGCCCCTTCGAGTACCCACAGTACTACCTGGCTGAGCCATG	2	2e-05	0
GAATGGCACAGAATGCCCTAACTTCTACGTGCCCTTCTCCAAT-CGATGGGTGTGGTACGCAGCCCCTTCGAGTACCCACAGTACTACCTGGCTGAGCCATG	2	2e-05	0
GAATGGCACAGAAGGCCCTAACTTCTACGTGCCCTT---------GATGGGTGTGGTACGCAGCCCCTTCGAGTACCCACAGTACTACCTGGCTGAGCCATG	2	2e-05	0
GAATGGCACAGAAGGCCCTAACTTCTACGTGCCCTTCTCCAATG--------------------CCCTTCGAGTACCCACAGTACTACCTGGCTGAGCCATG	2	2e-05	0
GAATGGCACAGAAGGCCCTAACTTCTACGTGCCCTTCTCCAATGCGATGGGTGTGGTACGCAGCCCCTTCGAGTACCCACAGTACTACCTGGCTGAGCCATG	2	2e-05	44TGGCCACTCCCTCTCTGCGCGCTCGCTCGCTCACTGAGGCCGGGCGACCAAAGGTCGCCCGACGCCCGGGCTT
GAACGGCACAG-AGGCCC-AA-TT-TATGTGCCCTTCTCCAA--CGA--GGCGTGGT--GCAGCCCCTTCGAGT--CCGCAGTACTACCTGGC-GA-CCATG	2	2e-05	14GC22TT44TCAC59GG73CA94GA
#NAME?	2	2e-05	0
GAATGGCACAGAAGGCCCTAACTTCTACGTGCCCTTCTCCAATGCGACGGGTGTGGTACGCAGCCCCATCGAGTACCCACAGTACTACCTGGCTGAGCCATG	2	2e-05	0
GAATGGCACAGAAGGCCCTAACTTCTACGTGCCCTTCTCCAATGCGATGGGTGTGGTACGCAGCCCCTTCGAGTACCCACAGTACTACCTGGCTGAGCCATG	2	2e-05	43GCG
GAACGGCACAG-AGGCCC-AA-TT-TATGTGCCCTTCTCCAA--CGA--GGCGTGGT--GCAGCCCCTTCGAG--CCCGCAGTACTACCTGGC-GA-CCATG	2	2e-05	14GC22TT44GCAC59GG74AG94GA
GAATGGCACAGAAGGCCCTAACTTCTACGTGCCCTTCTCCAAT--GATGGGTGTGGTACGCAGCCCCTTCGAGTACCCACAGTGCTACCTGGCTGAGCCATG	2	2e-05	0
GAATGGCACAGAAGGCCCTAACTTCCACGTGCCCTTCTCCAATGCGACGGGTGTGGTACGCAGCCCCTTCGAGTACCCACAGTACTACCTGGCTGAGCCATG	2	2e-05	0
GAATGGCACAGAAGGCCCTAACTTCTACGTGCCCTTCTCCAATGCGACGGGTGTGGTACGAAGCCACTTCGAGTACCCACAGTACTACCTGGCTGAGCCATG	2	2e-05	0
GAATGGCACAGAAGGCCCTAACTTCTACGTGCCCTTCTCCAACGCGATGGGCGTGGTACGCAGCCCCTTCGAGTACCCACAGTACTACCTGGCTGAGCCATG	2	2e-05	0
GAATGGCACAGAAGGCCCTAACTTCTACGTGCCCTTCTCCAA--------GTGTGGTACGCAGCCCCTTCGAGTACCCACAGTACTACCTGGCTGAGCCATG	2	2e-05	0
GAATGGCACAGAAGGCCCTAACTTCTACGTGCCCTTCTCCAA--CGATGGGTGTGGTACGCAGCCCCTTCGAATACCCACAGTACTACCTGGCTGAGCCATG	2	2e-05	0
GAATGGCACAGAAGGCCCCAACTTCTACGTGCCCTTCTCCAAT--GATGGGTGTGGTACGCAGCCCCTTCGAGTACCCACAGTACTACCTGGCTGAGCCATG	2	2e-05	0
GAATGGCACAGAAGGCCCTAACTTCTACGTGCCCTTCTCCAATGCGACGAGTGTGGTACGCAGCCCCTTCGAGTACCCACAGTACTACCTGGCTGAGCCATG	2	2e-05	0
GAACGGCACAG-AGGCCC-AA-TT-TATGTGCCCTTCTCCAA--CGA--GGCGTGGT--GCAGCCCCTTCGAG--CCCGCAGTACTACCTGGCTGAACCATG	2	2e-05	14GC22TT44TCAC59GG74AG
GAATGGCACAGAAGGCCCTAACTTCTACGTGCCCTTCTCCAAT-CGATGGGTGTGGTACGCAGTCCCTTCGAGTACCCACAGTACTACCTGGCTGAGCCATG	2	2e-05	0
GAATGGCACAGAAGGCCCTAACTTCTACGTGCCCTTC-CCAATGCGATGGGTGTGGTACGCAGCCCCTTCGAGTACCCACAGTACTACCTGGCTGAGCCATG	2	2e-05	0
GAATGGCACAGAAGGCCCTAATTTCTACGTGCCCTTCTCCAATGCGACGGGTGTGGTACGCAGCCCCTTCGAGTACCCACAGTACTACCTGGCTGAGCCATG	2	2e-05	0
GAATGGCACAGAAGGCCCTAACTTCTACGTGCCCTTCTCCAATGCGATGGGTGTGGTACGCAGCCCCTTCGAGTACCCACAGTACTACCTGGCTGAGCCATG	2	2e-05	43CGGGCGGCCTCAGTGAGCGAGCGAGCGCGCAGAGAGGGAGTG86CCA
GAATGGCACAGAAGGCCCTAACTTCTACGTGCCCTTCTCCAATGAGACGGGTGTGGTACGCAGCCCCTTCGAGTACCCACAGTACTACCTGGCTGAGCCATG	2	2e-05	0
GAATGGCACAGAAGGCCCTAACTTCTACGTGCCCTTCTCCAAT-CGATGGGTGTGGTACGCAACCCCTTCGAGTACCCACAGTACTACCTGGCTGAGCCATG	2	2e-05	0
#NAME?	2	2e-05	0
GAATGGCACAGAAGGCACTAACTTCTACGTGCCCTTCTCCAATGCGACGGGTGTGGTACGCAGCCCCTTCGAGTACCCACAGTACTACCTGGCTGAGCCATG	2	2e-05	0
GAATGGCACAGAAGGCCCTAACTTCTACGTGCCCTTCTCCAATGCGACGGGTGTGGTACGCAGCCCCTTCGAGTACCCACTGTACTACCTGGCTGAGCCATG	2	2e-05	0
GAATGGCACAGAAGGCCCTAACTTCTACGTGCCCTTCTCCAATG---T---TGTGGTACGCAGCCCCTTCGAGTACCCACAGTACTACCTGGCTGAGCCATG	2	2e-05	0
GAATGGCACAGAAGGCCCTAACTTCTACGTGCCCTTCTCCAATGCGATGGGTGTGGTACGCAGCCCCTTCGAGTACCCACAGTACTACCTGGCTGAGCCATG	2	2e-05	44TCCAT
GAATGGCACAGAAGGCCCTAACTTCTACGTGCCCTTCTCCAATGCGATGGGTGTGGTACGCAGCCCCTTCGAGTACCCACAGTACTACCTGGCTGAGCCATG	2	2e-05	44ACCCCACCTTCAGCTCAAGCCAGTCCCCCTGTTGTCCCCACTGTTGC92T94T
GAATGGCACAGAAGGCCCTAACTTCTACGTGCCCTTCTC-------------G-GGTACGCAGCCCCTTCGAGTACCCACAGTACTACCTGGCTGAGCCATG	2	2e-05	0
GAATGGCACAGAAGGCCCTAACTTCTACGTGCCCTTCTCCAA--CGATGGGTGTGGTACGCAGCCCCTTCGAGTACCCACAGTACTACCTGGCTGAGCCATT	2	2e-05	0
GAATGGCACAGCAGGCCCTAACTTCTACGTGCCCTTCTCCAATGCGATGGGTGTGGTACGCAGCCCCTTCGAGTACCCACAGTACTACCTGGCTGAGCCATG	2	2e-05	43G
GAATGGCACAGAAGGCCCTAACTTCTACGTGCCCTTCTCCAATGCGATGGGTGTGGTACGCAGCCCCTTCGAGTACCCACAGTACTACCTGGCTGAGCCATG	2	2e-05	35GG38CGCCCGGC49AGTGAGCGAGCGAGCGCG69GAGAGGG77G80GCC
GAATGGCACAGAAGGCCCTAACTTCTACGTGCC----------GCGATGGGTGTGGTACGCAGCCCCTTCGAGTACCCACAGTACTACCTGGCTGAGCCATG	2	2e-05	0
GAATGGCACAGAAGGCCCTAACTTCTACGTGCCCTTCTCCAATGCGATGGGTGTGGTACGCAGCCCCTTCGAGTACCCACAGTACTACCTGGCTGAGCCATG	2	2e-05	40TTGGCCGGGCGGCCTCAGTGAGCGAGCGAGCGCGCAGAG80GGG84G87GCCAA
GAATGGCACAGAAGGCCCTAACTTCTACGTGCCCTTCTCCGAT--GATGGGTGTGGTACGCAGCCCCTTCGAGTACCCACAGTACTACCTGGCTGAGCCATG	2	2e-05	0
GAATGTCACAGAAGGCCCTAACTTCTACGTGCCCTTCTCCAAT--GATGGGTGTGGTACGCAGCCCCTTCGAGTACCCACAGTACTACCTGGCTGAGCCATG	2	2e-05	0
GAATGGCACAGAAGGCCCTAACTTCTACGTGCCCTTCTCCAATGCGATGGGTATGGTACGCAGCCCCTTCGAGTACCCACAGTACTACCTGGCTGAGCCATG	2	2e-05	43G
GAATGGCACAGAAGGCCCTAACTTCTACGTGCCCTTCTCCAATGCGATGGGTGTGGTACGCAGCCCCTTCGAGTACCCACAGTACTACCTGGCTGAACCATG	2	2e-05	44C
GAATGGCACAGAAGGCCCTACCTTCTACGTGCCCTTCTCCAATG-GATGGGTGTGGTACGCAGCCCCTTCGAGTACCCACAGTACTACCTGGCTGAGCCATG	2	2e-05	0
GAATGGCACAGAAGGCCCTAACTTCTACGTGCCCTTCTCCAATGC-------------CGCAGCCCCTTCGAGTACCCACAGTACTACCTGGCTGAGCCATG	2	2e-05	44A
GAATGGCACAGAAGGCCCTAACTTCTACGTGCCCTTCTCCAATGCGATGGGTGTGGTACGCAGCCCCTTCGAGTACCCACAGTACTACCTGGCTGAGCCATG	2	2e-05	44AAAGCCCGGGCGGCCTCAGTGAGCGAGCGAGCGCGCAGAGAGGGAGTGGCCAA
GAATGGCACAGAAGGCCCTAACTTCTACGTGCCCTTCT-------------------------CCCCTTCGAGTACCCACAGTACTACCTGGCTGAGCCATG	2	2e-05	0
GAATGGCAAAGAAGGCCCTAACTTCTACGTGCCCTTCTCCAATGCGACGGGTGTGGTACGCAGCCCCTTCGAGTACCCACAGTACTACCTGGCTGAGCCATG	2	2e-05	0
GAATGGCACAGAAGGCCCTAACTTCTACGTGCCCTTCTCTAATG-GATGGGTGTGGTACGCAGCCCCTTCGAGTACCCACAGTACTACCTGGCTGAGCCATG	2	2e-05	0
GAATGGCACAGAAGGCCCTAACTTCTACGTGCCCTTCTCCAA---GATGGGTGTGGTACGCAGCCCCTTCGAGTACCCACAGTACTACCTGGCTGAGCCATG	2	2e-05	40A
GAATGGCACAGAAAGCCCTAACTTCTACGTGCCCTTCTCCAATGCGACGGGTGTGGTACGCAGCCCCTTCGAGTACCCACAGTACTACCTGGCTGAGCCATG	2	2e-05	0
GAATGGCACAGAAGGCCCTAACTTCTACGTGCCCTTCTCCAATGCGATGGGTGTGGTACGCAGCCCCTTCGAGTACCCACAGTACTACCTGGCTGAGCCATG	2	2e-05	44GTTGGTCGCCCGGCCTCAGTGAGCGAGCGAGCGCGCAGAGAGGGAGTGGCCAA
GAATGGCACAGAAGGCCCTAACTTCTACGTGCCCTTCTCCAATGCGATGGGTGTGGTACGCAGCCCCTTCGAGTACCCACAGTACTACCTGGCTGAGCCATG	2	2e-05	44GCCCGGCCTCAGTGAGCGAGCGAGCGCGCAGAGAGGGAGTGGCCAA
GAACGGCACAG-AGGCCC-AA-TT-TACGTGCCCTTCTCCAA--CGA--GGCGTGGT--GCAGCCCCTTCGAG--CCCGCAGTACTACCTGGC-GA-CCATG	2	2e-05	14GC22TT44TCAC59GG74AG94GA
GAACGGCACAGAGGGCCCTAA-TT-TATGTGCCCTTCTCCAA--CGA--GGCGTGGT--GCAGCCCCTTCGAG--CCCGCAGTACTACCTGGC-GA-CCATG	2	2e-05	22TT44TCAC59GG74AG94GA
GAATGGCACAGAAGGCCCTAACTTCTACGTGCCCTTCTCCAATGCGATGGGTGTGGTACGCAGCCCCATCGAGTACCCACAGTACTACCTGGCTGAGCCATG	2	2e-05	44A
GAATGGCACAGAAGGCGCTAACTTCTACGTGCCCTTCTCCAATGCGATGGGTGTGGTACGCAGCCCCTTCGAGTACCCACAGTACTACCTGGCTGAGCCATG	2	2e-05	0
GAATGGCACAGAAGGCCCTAACTTCTACGTGCCCTTCTCCAATGCGATGGGTGTGGTACGCAGCCCCTTCGAGTACCCACAGTACTACCTGGCTGAGCCATG	2	2e-05	44TGGCCACTCCCTCTCTGCGCGCTCGCTCGCTCACTGAGGCCGGGCGACCAAA
GAATGGCACAGAAGGCCCTAACTTCTACGTGCCCTTCTCCAA-GCGATGGGTGTGGTACGCAGCCCCTTCGAGTACCCACAGTACTACCTGGCTGAGCCATG	2	2e-05	40GTCGCCCGGCCTCAGTGAGCGAGCG66GCGCGC74A
GAATGGCACAGAAGGCCCTAACTTCTACGTGCCCTTCTCCAA--CGCTGGGTGTGGTACGCAGCCCCTTCGAGTACCCACAGTACTACCTGGCTGAGCCATG	2	2e-05	0
GAATGGCACAGAAGGCCCTAACTTCTACGTGCCCTTCTCCAAT--GATGGGTGTGGTACGTAGCCCCTTCGAGTACCCACAGTACTACCTGGCTGAGCCATG	2	2e-05	0
GAATGGCACAGAAGGCCCTAACTTCTACGTGCCCTTCTCCA---------GTGTGGTACGCAGCCCCTTCGAGTACCCACAGTACTACCTGGCTGAGCCATG	2	2e-05	0
GAATGGCACAGAAGGCCCTAACTTCTACGTGCCCTTCTCCAATGCGATGGGTGTGGTACGCAGCCCCTTCGAGTACCCACAGTACTACCTGGCTGAGCCATG	2	2e-05	44TTTGCGGCCGCAGGAACCCCTAGTGATGGAGTTGGCCACTCCCTCTCTGCGCGCTCGCTCGCTCACTGAGGCCGGGCGACCA
GAATGGCACAGAAGGCCCTAACTTCTACGTGCCCTTCTCCAATGCGATGGGTGTGGTACGCAGCCCCTTCGAGTACCCACAGTACTACCTGGCTGAGCCATG	2	2e-05	63CCCCTTCGACA
GAATGGCACAGAAGGCCCTAACTTCTACGTGCCCTTCTCCAAT--GATGGGTGTGGTACGCAGCCCCTTTGAGTACCCACAGTACTACCTGGCTGAGCCATG	2	2e-05	0
GAATGGCACAGAAGGCCCTAACTTCTACGTGCCCTTCTCCAATGCG--GGGTGTGGTACGCAGCCCCTTCGAGTACCCACAGTACTACCTGGCTGAGCCATG	2	2e-05	44GGA
GAATGGCACAGAAGGCCCTAACTTCTACGTGCCCTTCTCCAAT-CGATGGGTGTGGTACGCAGCCCCTTCGAGTACCCACAGTACTACCCGGCTGAGCCATG	2	2e-05	0
GAATGGCACAGAAGGCCCTAACTTCCACGCGCCCTTCTCCAATGCGATGGGTGTGGTACGCAGCCCCTTCGAGTACCCACAGTACTACCTGGCTGAGCCATG	2	2e-05	0
GAATGGCACAGAAGGCCCTAACTTCTACGTGCCCTTCTCCAATGCGACGGGTGTGGTACGCAGCCCCTTCGAGTACCCACAGTACTACCTGGCTGATCCATG	2	2e-05	0
GAATGGCACAGAAGGCCCTAACTTCTACGTGCCCTTCTCCAATGCGATGGGTGTGGTACGCAGCCCCTTCGAGTACCCACAGTACTACCTGGCTGAGCCATG	2	2e-05	45T
GAATGGCAGAGAAGGCCCTAACTTCTACGTGCCCTTCTCCAATGCGATGGGTGTGGTACGCAGCCCCTTCGAGTACCCACAGTACTACCTGGCTGAGCCATG	2	2e-05	0
GAACGGCACAG-AGGCCC-AA-TT-TATGTGCCCTTCTCCAA--CGA--GGCGTGGT--GCAGCCCCTTCGAG--CCCACAGTACTACCTGGC-GA-CCATG	2	2e-05	14GC22TT44TCAC59GG74AG94GA
GAATGGCACAGAAGGCCCTAACTTCTACGTGCCCTTCTCCAATGCGATGGGTGTGGTACGCAGCCCCTTCGAGTACCCACAGTACTACCTGGCTGAGCCATG	2	2e-05	49GGTGT
GAATGGCAAAGAAGGCCCTAACTTCTACGTGCCCTTCTCCAAT-CGATGGGTGTGGTACGCAGCCCCTTCGAGTACCCACAGTACTACCTGGCTGAGCCATG	2	2e-05	0
GAAT-GCACAG-AGGCCC-AA-TT-TATGTGCCCTTCTCCAA--CGA--GGCGTGGT--GCAGCCCCTTCGAG--CCCGCAGTACTACCTGGC-GA-CCATG	2	2e-05	3C14GC22TT44TCAC59GG74AG94GA
GAATGGCACAGAAGGCCCTAACTTCTACGTGCCCTTCTCCAATGCGACGGGTGTGGTACGCAGCCCCTTCGAGTATCCACAGTACTACCTGGCTGAGCCATG	2	2e-05	0
GAATGGCACAGAAGGCCCTAACTTCTACGTGCCCTTCTCTAATGCGACGGGTGTGGTACGCAGCCCCTTCGAGTACCCACAGTACTACCTGGCTGAGCCATG	2	2e-05	0
GAATGGCACAGAAGGCCCTAACTTCTACGTGCCCTTCTCCAATGCGATGGGTGTGGTACGCAGCCCCTTCGAGTACCCACAGTACTACCTGGCTGAGCCATG	2	2e-05	44TTGCCCGGGCGGCCTCAGTGAGCGAGCGAGCGCGCAGAGAGGGAGTGGCCAACTCCATCACTAGGGGTTCCTGCGGCCGT
GAATGGCACAGAAGGCCCTAACTTCTACGTGCCCTTCTCCAATGCGATGGGTGTGGTACGCAGCCCCTTCGAGTACCCACAGTACTACCTGGCTGAGCCATG	2	2e-05	44CGGCCGGCCTCAGTGAGCGAGCGAGCGCGCAGAGAGGGAGTGGCCA
GAATGGCACAGAAGGCCCTAACTTCTACGTGCCCTTCTCCAATGAGATGGGTGTGGTACGCAGCCCCTTCGAGTACCCACAGTACTACCTGGCTGAGCCATG	2	2e-05	44A
GAATGGCACAGAAGGCCCTAACTTCTACGTGCCCTTCTCCAATG--------------CGCAGCCCCTTCGAGTACCCACAGTACTACCTGGCTGAGCCATG	2	2e-05	0
GAATGGCACAGAAGGCCCTAACTTCTACGTGCCCTTCTCCAATGC---------GGTACGCAGCCCCTTCGAGTACCCACAGTACTACCTGGCTGAGCCATG	2	2e-05	0
GAATGGCACAGAAGGCCCTAACTTCTACGTGCCCTTCTCCAATGCGATGGGTGTGGTACGCAGCCCCTTCGAGTACCCACAGTACTACCTGGCTGAGCCATG	2	2e-05	44CCAAAACAGGATCTTTCCCAGAAGCT
CAATGGCACAGAAGGCCCTAACTTCTACGTGCCCTTCTCCAATGCGATGGGTGTGGTACGCAGCCCCTTCGAGTACCCACAGTACTACCTGGCTGAGCCATG	2	2e-05	0
GAATGGCACAGAAGGCCCTAACTTCTGCGTGCCCTTCTCCAATGCGACGGGTGTGGTACGCAGCCCCTTCGAGTACCCACAGTACTACCTGGCTGAGCCATG	2	2e-05	0
GAATAGCACAGAAGGCCCTAACTTCTACGTGCCCTTCTCCAAT-CGATGGGTGTGGTACGCAGCCCCTTCGAGTACCCACAGTACTACCTGGCTGAGCCATG	2	2e-05	0
GAATGGCACAGAAGGCCCTAACTTCTACGTGCCCTTCTCCAA--CGATGGGGGTGGTACGCAGCCCCTTCGAGTACCCACAGTACTACCTGGCTGAGCCATG	2	2e-05	0
GAATGGCACAGAAGGCCCTAACTTCTACGTGCCCTTCTCCAATGCGATGGGTGTGGTACGGAGCCCCTTCGAG--CCCGCAGTACTACCTGGC-GA-CCATG	2	2e-05	74AG94GA
GAATGGCACAGAAGGCCCTAACTTCTACGTGCCCTTCTCCAATGCGACGGGTGTGGTACGCAGCCCCGTCGAGTACCCACAGTACTACCTGGCTGAGCCATG	2	2e-05	0
GAATGGCACAGAAGGCCCTAACTTCTACGTGCCCTTCTCCA------------------------------AGTACCCACAGTACTACCTGGCTGAGCCATG	2	2e-05	0
GAATGGCACAGAAGGCCCTAACTTCTACGTGCCCTTCTCCAATGCGATGGGTGTGGTACGCAGCCCCTTCGAGTACCCACAGTACTACCTGGCTGAGCCATG	2	2e-05	36TGCCCGGGCGGC51AGTGAGCGAGCGAGCGCG71GAGAGGG79G82GCCAAC
GAATGGCACAGAAGGCCCTAACTTCTACGTGCCC----------------GTGTGGTACGCAGCCCCTTCGAGTACCCACAGTACTACCTGGCTGAGCCATG	2	2e-05	0
GAATGGCACAGAAGGCCCTAACTTCTACGTGCCCTTCTCCAATGCGATGGGTGTGGTACGCAGCCCCTTCGAGTACCCACAGTACTACCTGGCTGAGCCATG	2	2e-05	40TGGTCGCCCGGCCTCAGTGAGCGAGCGAGCGCGCAGAG79GGG83G86GCCAA
GAATGGCACAGAAGGCCCTAACTTCTACGTGCCCTTCTCCAATGCGATGGGTGTGGTATGCAGCCCCTTCGAGTACCCACAGTACTACCTGGCTGAGCCATG	2	2e-05	43G
GAATGGCACAGAAGGCCCTAACTTCTACGTGCCCTTCTCCAATGCGATGGGTGTGGTACGCAGCCCCTTCGAGTACCCACAGTACTACCTGGCTGAGCCATG	2	2e-05	43GTTGGCCACTCCCTCTCTGCGCGCTCGCTCGCTCACTGAGGCCGG92CC
GAATGGCACAGAAGGCCCTAACTTCTACGTGCCCTTCTCCAATGCGATGGGTGTGGTACGCAGCCCCTTCGAGTACCCACAGTACTACCTGGCTGAGCCATG	2	2e-05	43GTTGGCCACTCCCTCTCTGCGCGCTCGCTCGCTCACTGAGGCCGG
GAATGGCACAGAAGGCCCTAACTTCTACGTGCCCTTCTCCAAT-CGATGGGAGTGGTACGCAGCCCCTTCGAGTACCCACAGTACTACCTGGCTGAGCCATG	2	2e-05	0
GAATGGCACAGAAGGCCCTAACTTCTACGTGCCCT----------------TGTGGTACGCAGCCCCTTCGAGTACCCACAGTACTACCTGGCTGAGCCATG	2	2e-05	0
GAATGGCACAGAAGGCCCTAACTTCTACGTGCCCTTCTCCAATGCGATGGGTGTGGTACGCAGCCCCTTCGAGTACCCACAGTACTACCTGGCTGAGCCATG	2	2e-05	43G46GG
GAATGGCACAGAAGGCCCTAACTTCTACGTGCCCTTCTCCAATG-GATGGGTGCGGTACGCAGCCCCTTCGAGTACCCACAGTACTACCTGGCTGAGCCATG	2	2e-05	0
GAATGGCACAGAAGGCCCTAACTTCTACGTGCCCTT----------------------CGCAGCCCCTTCGAGTACCCACAGTACTACCTGGCTGAGCCATG	2	2e-05	0
GAATGGCACAGAAGGCCCTAACTTCTACGTGCCCTTCTCCAATG-GATGGGTGTGGTACGCAGTCCCTTCGAGTACCCACAGTACTACCTGGCTGAGCCATG	2	2e-05	0
GAATGGCACAGAAGGCCCTAACTTCTATGTGCCCTTCTCCAA--CGATGGGTGTGGTACGCAGCCCCTTCGAGTACCCACAGTACTACCTGGCTGAGCCATG	2	2e-05	0
GAATGTCACAGAAGGCCCTAACTCCTACGTGCCCTTCTCCAATGCGATGGGTGTGGTACGCAGCCCCTTCGAGTACCCACAGTACTACCTGGCTGAGCCATG	2	2e-05	0
GAATGGCACAGAAGGCCCTAACTTCTACGTGCCCTTCTCCAAT-CGATGGGTGTGGTACGCAGCCCCTTCGAGTACCCACAGTACTACCTGGCCGAGCCATG	2	2e-05	0
GAATGGCACAGAAGGCCCTAACTTCTACGTGCCCTTCTCCAAT-CGATGGGTGTGGTACGCAGCCCCTTTGAGTACCCACAGTACTACCTGGCTGAGCCATG	2	2e-05	0
GAATGGCACAGAAGGCCCTAACTTCTACGTGCCCTTCTCCAAT-CGATGGGTGTGGTACGCACCCCCTTCGAGTACCCACAGTACTACCTGGCTGAGCCATG	2	2e-05	0
GAATGGCACAGAAGGCCCTAACTTCTACGTGCCCTTCTCCAATGCGATGGGTGTGGTACGCAGCCCCTTCGAGTACCCACAGTACTACGTGGCTGAGCCATG	2	2e-05	0
GAATGGCACAGAAGGCCCTAACTTCTACGTGCCCTTCTCCAATGCGATGGGTGTGGTACGCAGCCCCTTCGAGTACCCACAGTACTACCTGGCTGAGCCATG	2	2e-05	44GCCGGGCGTCGGGCGACCTTTGGTCGCCCGGCCTCAGTGAGCGAGCGAGCGCGCA
GAATGGCACAGAAGGCCCTAACTTCTACGTGCCCTTCTCCAATGCGATGGGTGTGGTACGCAGCCCCTTCGAGTACCCAGAGTACTACCTGGCTGAGCCATG	2	2e-05	0
GAATGGCACAGAAGGTCCTAACTTCTACGTGCCCTTCTCCAATGCGACGGGTGTGGTACGCAGCCCCTTCGAGTACCCACAGTACTACCTGGCTGAGCCATG	2	2e-05	0
GAACGGCACAG-AGGCCC-AA-TT-TATGTGCCCTTCTCCAA--CGA--GGCGTGGT--GCAGCCCCTTCGAG--CCCGCAGTACTACCTGGC-GA-CCATG	2	2e-05	14GC22TT44TCAC59GG74AG94AA
GAATGGCACAGAAGGCCCTAACTTCTACGTGCCCTTCTCCAAT-CGATGGGTGTGGTACGCAGCCCCTTCGAGTACCCACAGTACTACCTGGCTGCGCCATG	2	2e-05	0
GAATGGCACAGAAGGCCCTAACTTCTACGTGCCCTTCTCCAATGCGATGGGTGTGGTACGCAGCCCCTTCGAGTACCCACAGTACTACCTGGCTGAG-CATG	2	2e-05	99T
GAATGGCACAGAAGGCTCTAACTTCTACGTGCCCTTCTCCAATGCGATGGGCGTGGTACGCAGCCCCTTCGAGTACCCACAGTACTACCTGGCTGAGCCATG	2	2e-05	0
GAATGGCACAGAAGACCCTAACTTCTACGTGCCCTTCTCCAATGCGACGGGTGTGGTACGCAGCCCCTTCGAGTACCCACAGTACTACCTGGCTGAGCCATG	2	2e-05	0
GAATGGCACATAAGGCCCTAACTTCTACGTGCCCTTCTCCAATG-GATGGGTGTGGTACGCAGCCCCTTCGAGTACCCACAGTACTACCTGGCTGAGCCATG	2	2e-05	0
GAATGGCACAGAAGGCCCTAACTTCTACGTGCCCTTCTCCAATGCGACGGGTGTGGTACGCAGCCCCTTCGAGTACCCACAGTACTACCTGGCTGAGCCATG	2	2e-05	44A
GAACGGCAAAG-AGGCCC-AA-TT-TATGTGCCCTTCTCCAA--CGA--GGCGTGGT--GCAGCCCCTTCGAG--CCCGCAGTACTACCTGGC-GA-CCATG	2	2e-05	14GC22TT44TCAC59GG74AG94GA
GAATGGCACAGAAGGCCCTAACTTCTACGTGCCCTTCTCCAATGCGATGGGCGTGGTACGCAGCCCCTTCGAGTACCCACAGTACTACCTGGCTGAGCCATG	2	2e-05	43G
GAATGGCACAGAAGGCCCTAACTTCTACGTGCCCTTCTCCAATG-GATGGGTGTGGTACGCAGCCCCTTCGAGTACCCACAGTACTACCTGGCTGAGCCATG	2	2e-05	45TG
GAATGGTACAGAAGGCCCTAACTTCTACGTGCCCTTCTCCAAT-CGATGGGTGTGGTACGCAGCCCCTTCGAGTACCCACAGTACTACCTGGCTGAGCCATG	2	2e-05	0
GAATGGCACAGAAGGCCCAAACTTCTACGTGCCCTTCTCCAATGCGATGGGTGTGGTACGCAGCCCCTTCGAGTACCCACAGTACTACCTGGCTGAGCCATG	2	2e-05	0
GAATGGCACAGAAGGCCCTAACTTCTACGTGCCCTTCTCCAATG-------------------------------------G---TACCTGGCTGAGCCATG	2	2e-05	0
GAATGGCACAGAAGGCCCTAACTTCTACGTGC--------------ATGGGTGTGGTACGCAGCCCCTTCGAGTACCCACAGTACTACCTGGCTGAGCCATG	2	2e-05	0
GAATGGCACAGAAGGCCCTAACTTCTACGTGCCCTTCTCCAAT--GATGGGTGTGGTACGCAGCCCCATCGAGTACCCACAGTACTACCTGGCTGAGCCATG	2	2e-05	0
GAACGGCACAG-AGGCCC-AA-TT-TATGTGCCCTTCCCCAA--CGA--GGCGTGGT--GCAGCCCCTTCGAG--CCCGCAGTACTACCTGGC-GA-CCATG	2	2e-05	14GC22TT44TCAC59GG74AG94GA
GAATGGCACAGAAGGCCCTAACTTCTACGTGTCCTTCTCCAATGCGACGGGTGTGGTACGCAGCCCCTTCGAGTACCCACAGTACTACCTGGCTGAGCCATG	2	2e-05	0
GAATGGCACAGAAGGCCCTAACTTCAACGTGCCCTTCTCCAATGCGATGGGTGTGGTACGCAGCCCCTTCGAGTACCCACAGTACTACCTGGCTGAGCCATG	2	2e-05	0
GAATGGCACAGATGGCCCTAACTTCTACGTGCCCTTCTCCAATGCGACGGGTGTGGTACGCAGCCCCTTCGAGTACCCACAGTACTACCTGGCTGAGCCATG	2	2e-05	0
GAATGGCACAGAAGGCCCTAACTTCTACGTGCCCTTCTCCAATGCGGTGGGTGTGGTACGCAGCCCCTTCGAGTACCCACAGTACTACCTGGCTGGGCCATG	2	2e-05	0
GAATGGCACAGAAGGCCCTAACTTCTACGTGCCCTTCTCCAA-GCGATGGGTGTGGTACGCAGCCCCTTCGAGTACCCACAGTACTACCTGGCTGAGCCATG	2	2e-05	40TTGGCCGGGCGACCA
GAATGGCACAGAATGCCCTAACTTCTACGTGCCCTTCTCCAATGCGACGGGTGTGGTACGCAGCCCCTTCGAGTACCCACAGTACTACCTGGCTGAGCCATG	2	2e-05	0
GAATGGCACAGAAGGCCCTAACTTCTACGTGCCCTTCTCCAATG----GGGTGTGGTACGCAGCCCCTTCGAGTACCCACAGTACTACCTGGCTGAGCCATG	2	2e-05	46A
GAATGGCACAGAAGGCCCTAACTTCTACGTGCCCTTCTCCAATGC--TGGGTGTGGTACGCAGCCCCTTCGAGTACCCACAGTACTACCTGGCTGAGCCATG	2	2e-05	43G
GAATGGCACAGAAGGCCCTAACTTCTACGTGCCCTTCTCCAAT---------------------------GAGTACCCACAGTACTACCTGGCTGAGCCATG	2	2e-05	0
GAATGGCACAGAAGGCCCTAACTTCTACGTGCACTTCTCCAAT-CGATGGGTGTGGTACGCAGCCCCTTCGAGTACCCACAGTACTACCTGGCTGAGCCATG	2	2e-05	0
GAATGGCACAGAAGGCCCTAACTTCTACGTGCCCTTCTCCAATGCGATGGGTGTGGTACGCAGCCCCTTCGGGTACCCACAGTACTACCTGGCTGAGCCATG	2	2e-05	43G
GAATGGCACAGAAGGCCCTAACTTCTACGTGCCCTTCTCCAATGCGACGGGTGTGGTACGCAGCCCCTTCGAGAACCCACAGTACTACCTGGCTGAGCCATG	2	2e-05	0
GAATGGCACAGAAGGCCCTAACTTCTACGTGCCCTTCTCCAATGC------------A--CACCCCCTTCGAGTACCCACAGTACTACCTGGCTGAGCCATG	2	2e-05	0
GAATGGCACAGAAGGCCCTAACTTCTACGTGCCCT---------------GTGTGGTACGCAGCCCCTTCGAGTACCCACAGTACTACCTGGCTGAGCCATG	2	2e-05	0
GAATGGCACAGAAGGCCCTAACTTCTACGTGCCCTTCTCCAATGCGATGGGTGTGGTACGCAGCCCCTTCGAGTACCCACAGTACTACCTGGCTGAGCCATG	2	2e-05	42GGTCGCCCGGCCTCAG59GAGCGAGCGAGCGCGCA
GAATGGCACAGAAGGCCCTAACTTATACGTGCCCTTCTCCAATGCGACGGGTGTGGTACGCAGCCCCTTCGAGTACCCACAGTACTACCTGGCTGAGCCATG	2	2e-05	0
GAATGGCACAGAAGGCCCTAACTTCTACGTGCCCTTCTCCAATGCGATGGGTGTGGTACGCAGCCCCTTCGAGTACCCACAGTACTACCTGGCTGAGCCATG	2	2e-05	44CGGCCTCAGTGAGCGAGCGAGCGCGCAGAGAGGGAGTGGCCAACTCCATCACTAGGGGT
GAATGGCACAGAAGGCCCTAACTTCTACGTGCCCTTCTCCAATG-GATGGGTGTGGTACGCAGCCCCTTCGAGTACCCACAGTACTACCTGGCTGAGCCATG	2	2e-05	43GGG
GAATGGCACAGAAGGCCCTAACTTCTACGTGCCCTTCTCCAATG-GATGGGTGTGGTACGCAGCCCCTTCGGGTACCCACAGTACTACCTGGCTGAGCCATG	2	2e-05	0
GAATGGCACAGAAGGCCCTTACTTCTACGTGCCCTTCTCCAATGCGATGGGTGTGGTACGCAGCCCCTTCGAGTACCCACAGTACTACCTGGCTGAGCCATG	2	2e-05	0
GAATGGCACAGAAGGCCCTAACTTCTACGTGCCCTTCTCCAAT-CGATGGGTGTGGTACGCAGCCCCTCCGAGTACCCACAGTACTACCTGGCTGAGCCATG	2	2e-05	0
GAATGGCACAGAAGGCCCTAACTTCTACGTGCCCTTCTCCAAT--GAGGGGTGTGGTACGCAGCCCCTTCGAGTACCCACAGTACTACCTGGCTGAGCCATG	2	2e-05	0
GAATGGCACAGAAGGCCCTAACTTCTACGTGCCCTTCTCCAATGCCACGGGCGTGGTACGCAGCCCCTTCGAGTACCCACAGTACTACCTGGCTGAGCCATG	2	2e-05	0
GAATGGCACAGAAGGCCCTAACTTCTACGTGCCCTTCTCCAAT---ATGGGTGTGGTACGCAGCCCCTTCGAGTACCCACAGTACTACCTGGCTGAGCCATG	2	2e-05	42T
GA------------------------------------------CGATGGGTGTGGTACGCAGCCCCTTCGAGTACCCACAGTACTACCTGGCTGAGCCATG	2	2e-05	0
GAACGGCACAG-AGGCCC-AA-TT-TATGTGCCCTTCTCCAA--CGA-GGGTGTGG---G-AGCCCCTTCGAG--CCCGCAGTACTACCTGGC-GA-CCATG	2	2e-05	14GC22TT44TCAC51C54G58A74AG94GA
GAATGGCACAGAAGGCCCTAACTTCT-CGTGCCC-TCTCCAATGCGATGGGTGTGGTACGCAGCCCCTTCGAGTACCCACAGTACTACCTGGCTGAGCCATG	2	2e-05	28GGCTT36CCGGGCGG48AG51GAGCGAGCGAGCG65G68GAGAGGG76G79GCCAACTCC
GAATGGCACAGAAGGCCCTAACTTCTACGTGCCCTTCTCCAATGCGATGGGTGTGGTACGCAGCCCCTTCGAGTACCCACAGTAGTACCTGGCTGAGCCATG	2	2e-05	0
GAATGGCACAGAAGGCCCTAACTTCTACGTGCCCTTCTCCAAT--GATGGGTGTGGTACACAGCCCCTTCGAGTACCCACAGTACTACCTGGCTGAGCCATG	2	2e-05	0
GAATGGCACAGAAGGCCCTAACTTCTACGTGCCCTTCTCCAATGCGACGGGTGTGGTACGCAGCCCCTTCGAGTACCCACAGTACTACCTGGCTGAGCTATG	2	2e-05	0
GAATGGCACAGAAGGCCCTAACTTCTACGTGCCCTTCTCCAATGCGATGGGTGTGGTACGCAGCCCCTTCGAGTACCCACAGTACTACCTGGCTGAGCCATG	2	2e-05	47TGGG
GAATGGCACAGAAGGCCCTAACTTCTACGTGCCCTTCTCCAATGCGATGGGTGTGGTACGCAGCCCCTTCGAGTACCCACAGTACTACCTGGCTGAGCCATG	2	2e-05	43GTTGGCCACTCCCTCTCTGCGCGCTCGCTCGCTCACTGAGGCCGCCCGGGCAAAGCCC
GAATGGCACAGAAGGCCCTAACTTCTACGTG--------------------------------------------CCCACAGTACTACCTGGCTGAGCCATG	2	2e-05	0
GAATGGCACAGAAGGCCCTAACTTCTACGTGCCCTTCTCCAATGCGATGGGTGTGGTACGCAGCCCCTTCGAGTACCCACAGTACTACCTGGCCGAGCCATG	2	2e-05	44C
GAATGGCACAGAAGGCCCTAACTTCTATGTGCCCTTCTCCAA--CGA--GGCGTGGT--GCAGCCCCTTCGAG--CCCGCAGTACTACCTGGC-GA-CCATG	2	2e-05	44TCAC59GG74AG94GA
GAATGGCACAGAAGGCCCTAACTTCTACGTGCCCTTCTCCAATGCGATGGGTGTGGTACGCAGCCCCTTCGAGTACCCACAGTACTACCTGGCTGAGCCATG	2	2e-05	41GGCCGGGCGGCCTCAGTGAGCGAGCGAGCGCGCAGAGAGGG83G86GCCAA
GAATGGCACAGAAGGCCCTAACTTCTACGTGCCCTTCTCC----CGACGGGTGTGGTACGCAGCCCCTTCGAGTACCCACAGTACTACCTGGCTGAGCCATG	2	2e-05	0
GAATGGCACAGAGGGCCCTAACTTCTACGTGCCCTTCTCCAAT--GATGGGTGTGGTACGCAGCCCCTTCGAGTACCCACAGTACTACCTGGCTGAGCCATG	2	2e-05	0
GAATGGCACAGAAGGCCCTAACTTCTACG------------------TGGGTGTGGTACGCAGCCCCTTCGAGTACCCACAGTACTACCTGGCTGAGCCATG	2	2e-05	0
GAATGGCACAGAAGGCCCTAACTTCTACGTGCCCTTCTCCAATGCGATGGGCGTGGTACGCAGCCCCTTCGAGCACCCACAGTACTACCTGGCTGAGCCATG	2	2e-05	0
GAATGGCACAGAAGGCCCTAACTTCTACGTGCCCTTCTCCA---CGATGGGTGTGGTACGCAGCCCCTTCGAGTACCCACAGTACTACCTGGCTGAGCCATG	2	2e-05	38C
GAATGGCACAGAAGGCCCTAACTTCTACGTGCCCTTCTCCAATGCGATGGGTGTGGTACGCAGCCCCTTCGAGTACCCACAGTACTACCTGGCTGAGCCATG	2	2e-05	43TTGGTCGCCCGGCCTCAGTGAGCGAGCGAGCGCGCAGAGAGGGAGTG91C
GAATGGCACAGAAGGCCCTAACTTCTACGTGCCCTTCTCCAATGCGATGGGTGTGGTACGCAGCCCCTTCGAGTACCCACAGTACTACCTGGCTGAGCCATG	2	2e-05	44GGCAAAGCCCGGGCGTCGGGCGACCTTTGGTCGCCCGGCCTCAGTGAGCGAGCGAGCGCGCAGAGAGGGAGTGGCCAA
GAATGGCACAGAAGGCCCTAACTTCTACGTGCCCTTCTCCAA--CGATGGGTGTGGTACGCAGCCCCTTCGAGTATCCACAGTACTACCTGGCTGAGCCATG	2	2e-05	0
GCATGGCACAGAAGGCCCTAACTTCTACGTGCCCTTCTCCAAT-CGATGGGTGTGGTACGCAGCCCCTTCGAGTACCCACAGTACTACCTGGCTGAGCCATG	2	2e-05	0
GAATGGCACGGAAGGCCCTAACTTCTACGTGCCCTTCTCCAAT-CGATGGGTGTGGTACGCAGCCCCTTCGAGTACCCACAGTACTACCTGGCTGAGCCATG	2	2e-05	0
GAATGGCACAGAAGGCCCTAACTTCTACGTGCCCTTCTCCAATGCGACGGGTGTGGTACGCAGCCCCTTCGAGTACACACAGTACTACCTGGCTGAGCCATG	2	2e-05	0
GAATGGCACAG--------------------------------------------------AG--CCTTCGAGTACCCACAGTACTACCTGGCTGAGCCATG	2	2e-05	0
GAATGGCACAGAAGGCCCTAACTTCTACGTGCCCTTCTCCAAT-CGATGGGTGTGGTACGCAGCCCCTTCGAGTACCCACAGTACTACCTGGCTGAGACATG	2	2e-05	0
GAATGGCACAGAAGGCCCTAACTTCTACGTGCCCTTCTCCAATG---TGGGTGTGGTACGCGGCCCCTTCGAGTACCCACAGTACTACCTGGCTGAGCCATG	2	2e-05	0
GAATGGCACAGAAGGCCCTAACTTCTACGTGCCCTTCTCCAA--CGATGGGTGTGGTACGCAACCCCTTCGAGTACCCACAGTACTACCTGGCTGAGCCATG	2	2e-05	0
GAATGGCACAGAAGGCCCTAACT---------------------CGATGGGTGTGGTACGCAGCCCCTTCGAGTACCCACAGTACTACCTGGCTGAGCCATG	2	2e-05	0
GAACGGCACAGATGGCCCCAA-TT-TATGTGCCCTTCTCCAA--CGA--GGCGTGGT--GCAGCCCCTTCGAG--CCCGCAGTACTACCTGGC-GA-CCATG	2	2e-05	22TT44TCAC59GG74AG94GA
GAACGGCACAG-AGGCCC-AA-TT-TATGTGCCCTTCTCCAATGC-A--GGCGTGGT--GCAGCCCCTTCGAG--CCCGCAGTACTACCTGGC-GA-CCATG	2	2e-05	14GC22TT44TCA59GG74AG94GA
GAATGGCACAGAAGGCCCTAACTTCTACGTGCCCTT-----A---GATGGGTGTGGTACGCAGCCCCTTCGAGTACCCACAGTACTACCTGGCTGAGCCATG	2	2e-05	0
GAATGGCACAGAAGGCCCTAACTTCTACGTGCCCTTCTCCAATG-GATGGGTGTGGTACGCAGCCCCTTCGAGTACCCACAGTACTACCTGGTTGAGCCATG	2	2e-05	0
GAATGGCACAGAAGGCCCTAACTTCTACGTGCCCTTCCCCAATG-GATGGGTGTGGTACGCAGCCCCTTCGAGTACCCACAGTACTACCTGGCTGAGCCATG	2	2e-05	0
GAATGGCATAGAAGGCCCTAACTTCTACGTGCCCTTCTCCAATGCGATGGGTGTGGTACGCAGCCCCTTCGAGTACCCACAGTACTACCTGGCTGAGCCATG	2	2e-05	43G
GAACGGCACAGAAGGCCCTAACTTCTACGTGCCCTTCTCCAATGCGATGGGCGTGGTACGCAGCCCCTTCGAGTACCCACAGTACTACCTGGCTGAGCCATG	2	2e-05	0
GAATGGCACAGAAGGCCCTAACTTCTACGTGCCCTTCTCCAA--CGATGGGTGTGGTACGCAGCCTCTTCGAGTACCCACAGTACTACCTGGCTGAGCCATG	2	2e-05	0
GAATGGCACAGAAGGCCCTAACTTCTACGTGCCCTTCTCCAATG-----------------------------------CAGTACTACCTGGCTGAGCCATG	2	2e-05	0
GAA--GCACAG-AGGCCC-AA-TT-TATGTGCCCTTCTCCAA--CGA--GGCGTGGT--GCAGCCCCTTCGAG--CCCGCAGTACTACCTGGC-GA-CCATG	2	2e-05	2AC14GC22TT44TCAC59GG74AG94GA
GAATGGCACAGAAGGCCCTAACTTCTACGTGCCCTTCTACAA--CGATGGGTGTGGTACGCAGCCCCTTCGAGTACCCACAGTACTACCTGGCTGAGCCATG	2	2e-05	0
GAATGGCACAGAAGGCCCTAACTTCTACGTGCCCTTCTCCAATGCGATGGGTGTGGTACGCAGCCCCTTCGAGTACCCACAGTACTACCTGGCTGAGCCATG	2	2e-05	44CGTCGGGCGGCCTCAGTGAGCGAGCGAGCGCGCAGAGAGGGAGTGGCCA
GAATGGCACAGAAGGCCCTAACTTCTACGTGCCCTTCTCCAATGCGATGGGTGTGGTACGCAGCCCCTTCGAGTACCCACAGTACTACCTGGCTGAGCCATG	2	2e-05	44ACCAAAGGTCGCCCGACGCCCGGGCTTTGCCCGGGCGGCCTCAGTGAGCGAGCGAGCGCGCAGAGAGGGAGTGGCCAAC
GAATGGCACAGAAGGCCCTAACTTCTACGTGCCCTTCTCCAATGCGACGGGTGTGGTACGCAGCCCCTTCGAGCACCCACAGTACTACCTGGCTGAGCCATG	2	2e-05	0
GAATGGCACAGAAGGCCCTAACTTCTACGTGCCCTTCTCCAAT-CGATGGGTGTGGTACGCAGCCCCTTCGAGTACCCACAGTTCTACCTGGCTGAGCCATG	2	2e-05	0
GAATGGCACAGAAGGCCCTAACTTCTACGTGCCCTTCTCCAATGCGATGGGTGTGGTACGCAGCCCCTTCGAGTACCCACAGTACTACCTGGCTGAGCCATG	2	2e-05	44GCCCGGGCGGCCTCAGTGAGCGAGCGAGCGCGC
GAATGGCACAGAAGGCCCTAACTTCTACGTGCCCTTCTCCAATGCGACGGGTGTGGTACGCAGCCCCTTCGAGTACCCACAGTACTACCTGGCTGAGCCGTG	2	2e-05	0
------------------------------------------------------------------------------------------------------	2	2e-05	0
GAATGGCACAGAAGGCCCTAACTTCTACGTGCCCTTCTCCAATGCGATGAGTGTGGTACGCAGCCCCTTCGAGTACCCACAGTACTACCTGGCTGAGCCATG	2	2e-05	43G
GAATGGCACAGAAGGCCCTAACTTCTACGTGCCCTTCTCCAATGCGATGGGTGTGGTACGCAGCCCCTTCGAGTACCCACAGTACTACCTGGCTGAGCCATG	2	2e-05	43GGCCACTCCCTCTCTGCGCGCTCGCTCGCTCACTGAGGCCGG
GAATGGCATAGAAGGCCCTAACTTCTACGTGCCCTTCTCCAATG-GATGGGTGTGGTACGCAGCCCCTTCGAGTACCCACAGTACTACCTGGCTGAGCCATG	2	2e-05	0
GAATGGCACAGAAGGCCCTAACTTCTACGTGCCCTACTCCAATGCGACGGGTGTGGTACGCAGCCCCTTCGAGTACCCACAGTACTACCTGGCTGAGCCATG	2	2e-05	0
GAATGGCACAGAAGGCCCTAACTTCTACGTGCCCTTCTCCAATGCGACGGGTGTGGTACGCAGCCCCTTCGAGTACCTACAGTACTACCTGGCTGAGCCATG	2	2e-05	0
GAATGGCACAGAAGGCCCTAACTTCTACGTGCCCTTCTCCAATGCGATGGGTGTGGTACGCAGCCCCTTCGAGTATCCACAGTACTACCTGGCTGAGCCATG	2	2e-05	43G
GAATGGCACAGCAGGCCCTAACTTCTACGTGCCCTTCTCCAAT-CGATGGGTGTGGTACGCAGCCCCTTCGAGTACCCACAGTACTACCTGGCTGAGCCATG	2	2e-05	0
GAATGGCACAGAAGGCCCTAACTTCTACGTGCCCTTCTCCAATGCGATGGGTGTGGTACGCAGCCCCTTCGAGTACCCACAGTACTACCTGGCTGAGCCATG	2	2e-05	44TTGGCCACTCCCTCTCTGCGCGCTCGCTCGCTCACTGAGGCCGGGCGACCA
GAATGGCACAGAAGGCCCTAACTTCTACGTGCCCTTCTCCAA--CGATGGGTGTGGTACGCAGCCCCTTCGAGTACCCACAGTACTACCTGGCTGAGCCATA	1	1e-05	0
GAATGGCACAGAAGGCCCTAACTGCTACGTGCCCTTCTCCAAT-CGATGGGTGTGGTACGCAGCCCCTTCGAGTACCCACAGTACTACCTGGCTGAGCCATG	1	1e-05	0
GAATGGCACAGAAGGCCCTAACTTCTACGTGCCCTTCTCCAATG-GATGGGTGTGGTACGCAGCCCCTTCTAGTACCCACAGTACTACCTGGCTGAGCCATG	1	1e-05	0
GAATTGCACAGAAGGCCCTAACTTCTACGTGCCCTTCTCCAAT--GATGGGTGTGGTACGCAGCCCCTTCGAGTACCCACAGTACTACCTGGCTGAGCCATG	1	1e-05	0
GAATGG-----------------------------------------------------------CCTTCGAGTACCCACAGTACTACCTGGCTGAGCCATG	1	1e-05	0
GAACGGCACAG-AGGCCC-AA-TT-TATGTGACCTTCTCCAA--CGA--GGCGTGGT--GCAGCCCCTTCGAG--CCCGCAGTACTACCTGGC-GA-CCATG	1	1e-05	14GC22TT44TCAC59GG74AG94GA
GAATGGCACAGAAGGCCCTAAATTCTACGCGCCCTTCTACAATGCGATGGGAGTGGTACGCAGCCCCTTCGAGTACCCACAGTACTAACAGGCTGAGCCATG	1	1e-05	0
GAATGGCACAGAAGGCCCTAACTTCTACGTGCCCTTCTCCATTGCGATGGGTGTGGTACGCAGCCCCTTCGTGTACCCACAGTACTACCTGGCTGAGCCATG	1	1e-05	0
GACCGGCACAGAAGGCCCTAACTTCTACGTGCCTTTCTCCAATGCGACGGGTGTGGTACGCAGCCCCTTCGAGTAACCACAGTACTACCTGGCTGAGCCATG	1	1e-05	0
GAATGGCACAGAAGGCCCTAACTTCTACGTGCCCTTCTCCAATG-GATGGGTGTGGTACGCAGCCCCTTCGAGTACCCACAGTACTACCTGGCTGAACCATG	1	1e-05	0
GAATGGCACAGAAGGCCCTAACCTCTACGTGCCCTTCTCCAATGCGATGGGTGTGGCACGCAGCCCCTTCGAGTACCCACAGTACTACCTGGCTGGGCCATG	1	1e-05	0
GAATGGCACAGAAGGCCCTAACTTCTACGTGCCCTTCTCCAAT-CGATGGGTGTGGTACGCAGCCCCTTCGAGTACCCACAGTATTACCTGGCTGAGCCATG	1	1e-05	0
GAATGGCACAGAAGGCCCTAACTTCTACGTGCCCTTCTCCAATGCGATGGGTGTGGTACGCAGCCCCTTCGAGTACCCACAGTACTACCTGGCTGAGCCATG	1	1e-05	40TTTGGTCGCCCGGCCTCAGTGAGCGAGCGAGCGCGCAGAGAGGG85G88GCCA
GAATGGCACTGAAGGCCCTAACTTCTACGTGCCCTTCTCCAATGCGATGGGTGTGGTACGCAGCCCCTTCGAGTACCCACAGTACTACCTGGCTGAGCCATG	1	1e-05	43G
GAATGGCACAGAAGGCCCTAACTTCTACGTGCCCTTCTCCAATGCGACGGGTGTGGTACGCCGCCCCTTCGAGTA-CCACAGTACTACCTGGCTGAGCCATG	1	1e-05	0
AAATGGCACAGAAGG--CTAACTTCTACGTGCCCTTCTCCAAT-CGATGGGTGTGGTACGCAGCCCCTTCGAGTACCCACAGTACTACCTGGCTGAGCCATG	1	1e-05	14GT
GAATGGCACAGAAGGCCCTAACTTCTACGTGCCCTTCTCCAATGCGACGGGTGTGGTACACAGCCCCTTCGAGTACCCACAGTATTACCTGGCTGAGCCATG	1	1e-05	0
GAATGGCACAGAAGGCCCTAACTTCTACGTGCCCCTCTCCAATGCGATGGGTGTGGTACGCAGCACCTTCGAGTACCCACAGTACTACCTGGCTGAGCCATG	1	1e-05	0
GATTGGCACAGAAGGCCCTAACTTCTACGTGCCCTTCTCCAATG-GATGGGTGTGGTACGCAGCCCCTTCGAGTACCCACAGTACTACCTGGCTGAGCCATG	1	1e-05	0
GAATGGCACAGAAGGCCCTAACTTCTACGTGCCCTTCTCCAATGAGATGGGTGTGGTACGCAGACCCTTCGAGTACCCACAGTACTACCTGGCTGAGCCATG	1	1e-05	0
GAATGGCACAGAAGGCCCTAACTTCTACGTGCCCTTCTCCAATGCGATGGGTGTGGTACGCAGCCCCTTCGAGTACCCACAGTACTACCTGGCTGAGCCATG	1	1e-05	44GCAAAGCCCGGGCGTCGGGCGACCTTTGGTCGCCCGGCCTCAGTGAGCGAGCGAGCGCGCAGAGAGGGAGTGGCCA
#NAME?	1	1e-05	0
GAATGGCACAGAAGGCCCTAACTTCTACGTGCCCTTCTCCAACGCGATGGGTGTGGTACGCAGCCCCTTTGAGTACCCACAGTACTACCTGGCTGAGCCATG	1	1e-05	0
GACTGGCACAGAAGGCCCTAACTTCTACGTGCCCTTCTCCCATGCGATGGGTGTGGTACGCAGCCCCTTCGAGTACCCACAGTACTACCTGGCTGAGCCATG	1	1e-05	0
GAATGGCACAGAAGGCCCTAACTTCTACGTGCCCTTCTCCAAT--GATGGGTGTGGTACGCAGCCCCTTCGTGTACCCACAGTACTACCTGGCTGAGCCATG	1	1e-05	0
GAATGGCACAGAAGGCCCTAACTTCTACGTGCCCTTCTCCAAGGCGATGGGTGTGGTACGCAGCCCCTTCGAGTACCCACAGTACTACCTGGCTGAGCCACG	1	1e-05	0
GAATGGCACAGAAGGCCCTAACTTCTACGTGCCCTTCTCCAAT--GATGGGTGTGGTACGCAGCCCCTTCGAGTACCCACAGTAGTACCTGGCTGAGCCATG	1	1e-05	0
GAATGGCACAGAAGGCCCTAACTTCTACGTGCCCTTCTCCAATGCGATGGGTGTGGTACGCAGCCCCTTCGAGTACCCACAGTACTACCTGGCTGAGCCATG	1	1e-05	44GTTGGTCACTCCCTCTCTGCGCGCTCGCTCGCTCACTGAGGCCGGGCGACCA
GAATGGCACAGAAGGCCCTAACTTCTACGTGCCCTTCTCCAATG---TGGGTGTGGTACGCAGCCACTTCGAGTACCCACAGTACTACCTGGCTGAGCCATG	1	1e-05	0
GAATGGCACAGAAGGCCCTAACTTCTACGTGACCTTCTCCA-----ATGGGTGTGGTACGCAGCCCCTTCGAGTACCCACCGTACTACCTGGCTGAGCCAGG	1	1e-05	0
GAATGGCACAGAAGGCCCTAACTTCTATGTGCCCTTCTCCAATGCGATGGGTGTGGTCCGCAGCCCCTTCGAGTACCCACAGTACTCCCTGGCTGAGCCATG	1	1e-05	0
GAATGGCACAGAAGGCCCTAACTTCTACGTGCCCTTCTCCAATGCGATGGGTGTGGTACGCAGCCCCTTCGAGTACCCACAGTACTACCTGGCTGAGCCATG	1	1e-05	43GCCAAAGGTCGCCCGACGCCCGGGCTTTGCCCGGGCGGCCTCAGTGAGCGAGCGAGCGCGCAGAGAGG
GAATGGCACAGAAGGCCCTAACTTCTACGTGCCCTTCTCCAATGCGACGGGTGTGGTACGCAGCCCCTTCGAGTACCCTCAGTACTACCTGGCTGTGCCATG	1	1e-05	0
GAATGGCACAGAAGGCCCTAACTTCTACGTGCCCTTTTCCAATGCGATGGGTGTGGTACGCAGCCCCTTCGAGTACCCACAGTACTACCTGGCTGAGCCATG	1	1e-05	44GGTCGCCCGACGCCCGGGCAAT
GAATGGCACAGAAGGCCCTAACTTCTACGTGCCCTTCTCCACTGCGATGGGTGTGGTACGCAGCCCCTTCGAGTACCCACAGTACT--CTGGCTGAGCCATG	1	1e-05	85CA
GAATGGCACAGAAGGCCCTAACTTCTACGTGCCCTTCTCCAAT-CGATGGTTGTGGTACGCAGCCCCTTCAAGTACCCACAGTACTACCTGGCTGAGCCATG	1	1e-05	0
GAATGGCCCAGAAGGCCCTAATTTCTACGTGCCCTTCTCCAATGCGATGGGTGTGGTACGCAGCCTCTTCGAGTACCCACAGTACTACCTGGCTGAGCCATG	1	1e-05	0
GAAAGGCACAGAAGGCCCTAACTTCTACGTGCCCTTCTCCAA--CGA--GGCGTGGT--GCAGCCCCTTCGAG--CCCGCAGTACTACCTGGC-GA-CCATG	1	1e-05	44TCAC59GG74AG94GA
GAATGGCACAGAAGGCCCTAACTTCTATGTGCCCTTCTCC------ATGGGTGTGGTACGCAGCCCCTTCGAGTACCCACAGTACTACCTGGCTGAGCCATG	1	1e-05	0
GAATGGCACAGAAGGCCCTAACTTCTACGTGCCCTTCTCCAATGCGATGGGTGTGGTACGCAGCCCCTTCGAGTACCCACAGTACTACCTGGCTGAGCCATG	1	1e-05	43GTCGCCCGGCCTCAGTGAGCGAGCGAGCGCGCAGAGAGGGAGTGGCCAACTCCATCACTAGGG
GAATGGCACAGAAGGCCCTAACTTCTACGCGCCCTTCTCCAAT-------------------GCCCCTTCGAGTACCCACAGTACTACCTGGCTGAGCCATG	1	1e-05	0
GAATGGCACAGAAGGCCCTAACTTCTACGTGCCCTTCTTCAATGCGACGGGTGTGGTACGCAGCCCCTTCGAGTACCCACAGTACTACCTGGCTGAGCCATG	1	1e-05	0
GAATGGCACAGAAGGCCCTAACTTCTACGTGCCCTTCTACAAT-CGATGGGTGTGGTACGCAGCCCCTTCGAGTACCCACAGTACTACCTGGCTGAGCCATG	1	1e-05	0
GAATGGCACAGAAGGCCCTAACTTCTACGTGCTCTTCTCCAATGCGACGGGTGTGGTACGCAGCCCCTTCGAGTACCCACAGTACTACCTGGCTGAGCCATG	1	1e-05	0
GAATGGCACAGAAGGCCCTAACTTCTACGTGCCCTTCTACAATG-GATGGGTGTGGTACGCAGCCCCTTCGAGTACCCACAGTACTACCTGGCTGAGCCATG	1	1e-05	0
GAATGGCACAG-AGGCCCTAACTTCTGCGTGCCCTTCTCCAATGCGATGGGTGTGGTACGCAGCCCCTTCGAGTACCCACAGTACTACCTGGCTGAGCCATG	1	1e-05	0
GAATGGCACAGAAGGCCCTAACTTCTACATGCCCTTCTCCAAT-CGATGGGTGTGGTACGCAGCCCCTTCGAGTACCCACAGTACTACCTGGCTGAGCCATG	1	1e-05	0
GAATGGCACAGAAGGCCCTAACTTCTACGTGCCCTTCTCCAATGCGATGGGTGTTGTACGCAGCCCCTTCGAGTACCCACAGTACTACCTGGCTGAGCCATG	1	1e-05	44C
GAATGGCACAGAAGGCCCTAACTTCTACGTGCCCTTCTCCAATGCGATGGGTGTGGTACGCAGCCCCTTCGAGTACCCACAGTACTACCTGGCTGAGCCATG	1	1e-05	42GCTTTGGTCGCCCGGCCTCAGTGAGCGAGCGAGCGCGCAGAGAGGGAG92GCCA
GAATGGCACAGAAGGCCCTAACTTCTACGT-CCCTTCTCCAATGCGATGGGTGTGGTACGCAGCCCCTTCGAGTACCCACAGTACTACCTGGCTGAGCCATG	1	1e-05	0
GAATGGCACAGAAGGCCCTAACTTCTACGTGCCCTTCTCCAATGCGATGGGTGTGGTACGCAGCCCCTTCGAGTACCCACAGTACTACCTGGCTGAGCCATG	1	1e-05	53TGGTA
GAATGGCACAGAAGGCCCTAACTTCTACGTGCCCTTCTCCAATGCGATGGGTGTGGTACGCAGCCCCTTCGAGTACCCACAGTACTACCTGGCTGAGCCATG	1	1e-05	44TTGCCCGGGCGGCCTCAGTGAGCGAGCGAGCGCGCA
GAATGGCACAGAAGTCCCTAACTACTACGTGCCCTTCTCCAATGCGATGGGTGTGATACGCAGCCCCTTCGAGTACCCACAGTACTACCTGGCTGATCCATG	1	1e-05	0
GAATGGCACAGAAGGCCCTAACTTCTACGTGCCCTTCTCCAATG----------------------------------------------------------	1	1e-05	0
GAATGGCACAGAAGGCCCTAACTCCTACGTGCCCTTCTCCAATGCGATGGGTGTGGTACGCAGCCCCTTCGAGTACCCACAGTACTCCCTGGCTGAGCCATG	1	1e-05	0
GAATGGCACAGAAGGCCCTAACTTCTACGTGCCCTTCTCCAATGCGATGGGTGTGGTACGCAGCCCCTTCGAGTACCCACAGTACTACCTGGCTGAGCCATG	1	1e-05	45GATGA
GGATGGCACAGAAGGCCCTAACTTCTACGTGCCCTTCTCCAA-GCGATGGGTGTGGTACGCAGCCCCTTCGAGTACCCACAGTACTACCTGGCTGAGCCATG	1	1e-05	0
GAATGGCACAGAAGGCCCTAACTTCTACGTGCCCTTCTCCAATGCGATGGGTGTGGTACGCAGCCCCTTCGAGTACCTACAGTACTACCTGTCTGAGCCATG	1	1e-05	0
GAATGGCACAGAAGGCCCTAACTTCTACGTGCCCTTCTCCAA--CAATGGGTGTGGTACGCAGCCCCTTCGAGTACCCACAGTACTACCTGGCTGAGCCATG	1	1e-05	0
GAATGGCACAGAAGGCCCTAACTTCTACGTGCCCTTCTCCAAT-CGATGGGTGTGTTACGCAGCCCCTTCGAGTACCCACAGTACTACCTGGCTGAGCCATG	1	1e-05	0
GAATGGCACAGAAGGCCCTAACTTCTACGCGCCCTTCTCCAAT-CGATGGGTGTGGTACGCAGCCCCTTCCAGTACCCACAGTACTACCTGGCTGAGCCATG	1	1e-05	0
GAATGGCACAGAAGGCCCTAACTTCTACGTGCCCTTCTCCAAT-CGATGGGTGTGGTACGCAGCCTCTTCGAGTACCCACAGTACTACCTGGCTGAGCCATG	1	1e-05	0
GAATGGCACAGAAGGCCCTAACTTCTACGTGCCCTTCTCCAATG-GATGGGTGTGGTACGCAGCCTCTTCGAGTACCCACAGTACTACCTGGCTGAGCCATG	1	1e-05	0
GAATGGCACAGAAGGCCCTAACTTCTACGTGCCCATCTCCAATGCGATGGGTGTGGCACGCAGCCCCTTCGAGTACCCACAGTACTACCTGGCTGAGCCATG	1	1e-05	0
GAATGGCACAGAAGGCCCTAACTTCTACGTGCCCTT-TCCAA--CGATGGGTGTGGTACGCAGCCCCTTCGAGTACCCACAGTACTACCTGGCTGAGCCATG	1	1e-05	0
GAATGGCACAGAAGGCCCTAACTTCTACGTGCCCTTCTCCAATGCGATGGGTGTGGTACGCAGCCCCTTCGAGTACCCACAGTACTACCTGGCTGAGCCATG	1	1e-05	44CTGCCCGGGCGGCCTCAGTGAGCGAGCAAGCGCGC
GAATGGCACAGAAGGCCCTAACTTCTACGTG----------------TGGGTGTGGTACGCAGCCCCTTCGAGTACCCACAGTACTACCTGGCTGAGCCATG	1	1e-05	0
GAATGGCACAGAAGGCCCTGACTTCTACGTGCCCTTCTCCAATGCGATGGGTGTGGTACGCAGCCCCTTCGAGTACCCACAGTACTACCTGGCTGAGCCATG	1	1e-05	44A
GAATGGCACAGAAGGCCCTAACTTCTACGTGCCCTTCTCCAATGCGATGGGTGTGGTACGCAGCCCCTTCGAGTACCCACAGTACTACCTGGCTGAGCCATG	1	1e-05	43TGGTCGCCCGGCCTCAGTGAGCGAGCGAGCGCGCAGAGAGGGAGTG90CCAA
GAATGGCACAGAAGGCCCTAACTTCTACGTGCCCTTCTCCAATGCGATGGGTGTGGTACGCAGCCCCTTCGAGTACCCACAGTACTACCTGGCTGAGCCATG	1	1e-05	42CCCCGGGCGGCCTCAGTGAGCGAGCGAGCGCGCAGAGAGGGAG87GCCAA
GAATGGCACAGAAGGCCCTAACTTCTACGTGCCCTTCTCCAATGCGATGGGTGTGGTACGCAGCCCCTTCGAGTACCCACAGTACTACCTGGCTGAGCCATG	1	1e-05	44GTCGGGCGGCCTCAGTGAGCGAGCGAGCGCGCAGAGAGGGAGTGGCCA
GAATGGCACAGAAGGCCCTAACTTCTACGTGCCCTTCTCCAATGCGATGGGTGTGGTCCGCAGCCCCTTCGAGTACCCACAGTACTACCTGGCTGAGCCATG	1	1e-05	0
GAATGGCACAGAAGGCCCTAACTTCTACGTGCCCTCCTCCAAGGCGATGGGGGTGGTACGCAGCCCCTTCGGGTACCCACAGTACTACCTGGCTGGGCCATG	1	1e-05	0
GAATGGCACAGAAGGCCCTAACTTCTACGTGCCCTTCTCCAATGCGATGGGTGTGGTACGCAGCCCCTTCGAGTACCCACAGTACTACCTGGCTGAGCCATG	1	1e-05	44TTGGCCACTCCCTCTCTGCGCGCTCGCTCGCTCACTGAGGC87CC90GGGC
GAATGGTACAGAAGGCCCTAACTTCTACGTGCCCTTCTCTAATGCGATGGGTGTGGTACGCAGCCCCTTCGAGTACCCACAGTACTACCTGGCTGAGCCATG	1	1e-05	0
GAATGGCACAGAAGGCCCTAACTTCTACGTGCCCTTCTCCAATG---TGGGTGTGGTACGCAGCCCCTTCGAGTACCCACAGTACTACCTGGCTGAACCATG	1	1e-05	0
GAATGGCACAGAAGGCCCTAACTTCTACGTGCCCTTCTCCACT-CGATGGGTGTGGTACGCAGCCCCTTCGAGTACCCACAGTACTACCTGGCTGAGCCATG	1	1e-05	0
GAATGGCACAGAAGTCCCTAACTTCTACGTGCCCTTCTCCAATGCGACGGGTGTGGTACGCAGCCCCTTCGAGTACCCACAGTACTACCTGGCTGAGCCATG	1	1e-05	0
GAATGGCACAGAAGGCCCTCACTTCTACGTGCCCTTCTCCAATGCGATGGGTGTGGTACGCAGCCCTTTCGAGTACCCACAGTACTACCTGGCTGAGCCATG	1	1e-05	0
GAATGGCACAGAAGGCCCTAACTTCTACGTGCCCTTCTCCAATGCGATGGGTGTGGTTCGCAGCCCCTTCGAGCACCCACAGTACTACCTGGCTGCGCCATG	1	1e-05	0
GAATGGCACAGAAGGCCCTAACTTCTACGTGCCCTTCTCCAATGCGATGAGTGTGGTACGCAGCCCCTTCGAGTACTCACAGTACTACCTGGCTGAGCCATG	1	1e-05	0
GAATGGCACAGGAGGCCCTAACTTCTACGTGCCCTTCTCCAAT-CGATGGGTGTGGTACGCAGCCCCTTCGAGTACCCACAGTACTACCTGGCTGAGCCATG	1	1e-05	0
GAATGGCACAGAAGGCCCTAACTTCTACGTGCCCTTCTCCAATGCGATGGGGGTGGAACGCAGCCCCTTCGAGTACCCACAGTACTACCTGGCTGAGCCATG	1	1e-05	0
GAATGGCACAAAAGGCCCTAACTTCTACGCGCCCTTCTCCAATGCGATGGGTGTGGTACGCAGCCCCTTCCAGTACTCATAGTACTTCCTGGCTGAGACATG	1	1e-05	0
GAATGGCACAGAAGGCCCTA------------------------CGATGGGTGTGGTACGCAGCCCCTTCGAGTACCCACAGTACTACCTGGCTGAGCCATG	1	1e-05	0
GAATGGCACAGAAGGCCCTAACTTCTACGTGCCCTTCTCCAATGCGATGGGTGTGATACGCACCCCCTTCGAGTACCCACAGTACTACCTGGCTGAGCCATG	1	1e-05	0
GAATGGCACAGAAGGCCCTAACTTCCACGTGCCCTTCTCCAATGCGATGGGTGTGGTACGCAGCCCCTTCGTGTACCCACAGTACTACCTGGCTGAGCCATG	1	1e-05	0
GAATGGCACAGAAGGCCCTAACTTCTACGTGACCTTCTCCAATGCGATGGGTTTGGTACGCAGCCCCTTCGAGTACCCACAGTACTACCTGGCTGAGCCATG	1	1e-05	0
GAATGGCACAGAAGGCCCTAACTTCTACGTGCCCTTCTCCAATGCGATGGGTGTGGTACGCAGCCCCTTCGAGTACCCACAGTACTACCTGTCTGAGCCTTG	1	1e-05	0
GAACGGCACAG-AGGCCC-AA-TT-TATGTGCCCTTCTCCAA--CGA--GGCGTGGT--GCAGCCCCTTCGAG--CCCGCAGTACTATCTGGC-GA-CCATG	1	1e-05	14GC22TT44TCAC59GG74AG94GA
GAATGGCACAGAAGGCCCTAACTTCTACGTGCCCTTCTCCAATGCGATGGGTGTGGTACGCAGCCCC-TCGAGTACCCACGGTACTACCTGGCTGAGCCATG	1	1e-05	0
GACTGGCACAGACGGCCCTAACTTCTACGTGCCCTTCTCCAATGCGATGGGTGTGGTACGCAGCCCCTTCGAGTACCCACAGTACTACCTGGCTGGGCCATG	1	1e-05	43G
GAATGGCACAGAAGGCCCTAACTTCTACGTGCCCTTCTCCAATGCGATGGGTGTGGTACGCAGCCCCTTCGAGTACCCACAGTACTACCTGGCTGAGCCATG	1	1e-05	44GCGCTCGCTCGCTCACTGAGGCCGCCCGACCC
GAATGGCACAGAAGGCCCTAACTTCTACGTGCCCTTCTACAATGCGATGGGTGTGGCACGGAGCCCCTTCGAGTACCTACAGTACTACCTGGCTGAGCCATG	1	1e-05	0
TAATGGCACAGAAGGCCCTAACTTCTACGTGCTCTTCTCCAATGCGATGGGTGTGGTACGCAACCCCTTCGAGTACCCACAGTACTACCTGGCTGAGCCATG	1	1e-05	0
GAATGGCACAGAAGGCCCTAACTTCTACGTGCCCTTCTCCAATG-GATGGGTGTGGTACGCAGCCCCTTCGAGTACCCACAGTACTACCTGGCTGAGCCATG	1	1e-05	45CA
GAATGGCACAGAAGGCCCTAACTTCTACGTGCCCTTCTCCAATGCGATGGGTGTGGTACGCAGCCCCTTCGAGTACCCACAGTACTACCTGGCTGAGCCATG	1	1e-05	44TTGGCCACTCCCTCTCTGCGCGCTCGCTCGCTCACTGAGGCCGGGCGAC94AAAGG
GAATGGCACAGAAGGCCCTAACTTCTACGTGCCCTTCTCCAAT-CGATGGGTGTGGTACGCAGCCCCTTCGAGTACCCACCGTACTACCTGGCTGAGCCATG	1	1e-05	0
GAATGGCACAGAAGGCCCTAACTTCAACGTGCCCTTCTCCAATGCGATGGGCGTGGTACGCAACCCCTTCGAGTACCCACAGTATTACCTGGCTGCGCCATG	1	1e-05	0
GAATGGCACAGAAGGCCCTAACTTCTACGTGCCCTTCTCCAATGCGATGGGTGTGGTACGCAGCCCCTTCGAGTACCCACAGTACTACCTGGCTGAGCCATG	1	1e-05	42AGCCCGGGCGTCGGGCGACCTTTGGTCGCCCGGCCTCAGTGAGCGAGCGAGCGCGCAGAGAGGGAG
GAATGGCACAGAAGGCCCTAACTTCTACGTGCCCTTCTCCAATGC-AT-GGTGTGGTACGCAGCCCCTTCGAGTACCCACAGTACTACCTGGCTGAGCCATG	1	1e-05	46AC
GAATGGCACAGAAGGTCCTAACTTCTACGTGCCCTTCTCCAATGCGATGGGTGTGGTACGCAGCCCCTTCGAGTACCCACAGTACTACCTGGCTGAGCCATG	1	1e-05	44CGGCCGCAGGAACCCCTAGTGATGGAGTTCGCCACTCCCTCTCTGCGCGCTCGCTCGCCCACTGAGGCCGCCCGGGCAAAGCC
GAAAGGCACAGAAGGCCCTAACTTCTACGTGCCCTTCTCCAATGCGACGGGTGTGGTACGCAGCCCCTTCGAGTACCCACAGTACTACCTGGCTGAGCCATG	1	1e-05	0
GAATGGCACAGAAGGCCCTAACTTCAACGTGCCCTTCTCCAATGCGATGGGTGTGGTACGCAGCCCCTTCGAGTACCCACAGTACTACCTGGCTGAGCCATG	1	1e-05	44C
GAATGGCACAGAAGGCCCTAACTTCTAAGTGCCCTTCTCCA---CGATGGGTGTGGTACGCAGCCCCTTCGAGTACCCACAGTACTACCTGGCTGAGCCATG	1	1e-05	0
GAATGGCACAGAAGGCCCTAACTTCTACGTGCCCTTCTCCAATGCGATGGGTGTGGTACGCAGCCCCTTCGAGTACCCACAGTACTACCTGGCTGAGCCATG	1	1e-05	41GGGCGGCCTCAGTGAGCGAGCGAGCGCGCAGAGAGGGAGTGGCCAACTCC93CACTAGGGGTTCCTGCGGCCGTTGGGTCCGCACGTG
GAATGGCACAGAAGGC--TAACTTCTACGTGCCCTTCTCCAATGCGACGGGTGTGGTACGCAGCCCCTTCGAGTACCCACAGTACTACCTGGCTGAGCCATG	1	1e-05	15AA
GAACGGCACAGAAGGCCCTAACTTCTACGTGCCCCTCTCCAATGCGATGGGTGTGGTACGCAGCCCCTTCGAGTACCCACAGTACTACCTGGCTGAGCCATG	1	1e-05	0
GAATGGCACAGAAGGCCCTAACTTCTACGTGCCCTTCTCCAATGCGACGGGTGTGGTACGGAGCCCCTTCGAGTACCCACAGTACTACCTGGCGGAGCCATG	1	1e-05	0
GAATGGCACAGAAGGCCCTAACTTCTACGTGCCCTTCTCCAA--CGATGGGTGTGGTACACAGCCCCTTCGAGTACCCACAGTACTACCTGGCTGAGCCATG	1	1e-05	0
GAATGACACAGAAGGCCCTAACTTCTACGTGCCCTTC-------CGATGGGTGTGGTACGCAGCCCCTTCGAGTACCCACAGTACTACCTGGCTGAGCCATG	1	1e-05	0
GAGTGGCACAGAAGGCCCTAACTTCTACGTGCCCTTCTCCAAT-CGATGGGTGTGGTACGCAGCCCCTTCGAGTACCCACAGTACTACCTGGCTGAGCCATG	1	1e-05	0
AAATGGCACAGAAGGCCCTAACTTCTACGTGCCCTTCTCCA---CGATGGGTGTGGTACGCAGCCCCTTCGAGTACCCACAGTACTACCTGGCTGAGCCATG	1	1e-05	0
GAATGGCACAGAAGGCCCTAACTTCTACGTGTCCTTCTCCAATGCGATGGGTGTGGTACGCAGCCCCTTCGAGTACCCACAGTACCACCTGGCTGAGCCATG	1	1e-05	0
GAATGGCACAGAAGGCCCTAACTTCTACGTGCCCTTCTCCAATG--ATGGGTGTGGTACGCAGCCCCTTCGAGTACCCACAGTACTACCTGGCTGAGCCATG	1	1e-05	42A
GAATGGCACAGAAGGGCCTAACTTCTACGTGCCCTTCTCCAATGCGACGGGTGTGGTACGCAGCCCCTTCGAGTACCCACAGTACTACCTGGCTGAGCCATG	1	1e-05	0
GAATGGCACAGAAGGCCCTAACTTCTACGTGCCCTTCTCCAATGCGATGGGTGTGGTACGCAGCCCCTTCGAGTACCCACAGTACTACCTGGCTGAGCCATG	1	1e-05	43CCGGGCGGCCTCAGTGAGCGAGCGAGCGCGCAGAGAGGGAGTG87CCA
GAATGGGACAGAAGGCCCTAACTTCTACGTGCCCTTCTCCAATGCGATGGGTGTGGTACGCAGCCCCTTCGAGTACCCACAGTACTACCTGGCTGAGCCATG	1	1e-05	0
GAACGGCACAGAGGGCCC-AA-TT-TATGTGCCCTTCTCCAA--CGA--GGCGTGGT--GCAGCCCCTTCGAG--CCCGCAGTACTACCTGGC-GA-CCATG	1	1e-05	21TT43TCAC58GG73AG93GA
GAATGGCACAGAAGGCCCTAACTTCTACGTGCCC-TCTCCAATGCGATGGGTGTGGTACGCAGCCCCTTCGAGTACCCACAGTACTACCTGGCTGAGCCATG	1	1e-05	32CCGGGCGG44AG47GAGCGAGCGAGCG61G64GAGAGGG72G75GCCA
GAATGGCACAGAAGGCCCTAACTTCTACGTGCCCTTCTCCAATGCGATGGGTGTGGTACGCAGCCCCTTCGAGTACCCACAGTACTACCTGGCTGAGCCATG	1	1e-05	42CGGGCGGCCTCAGTGAGCGAGCGAGCGCGCAGAGAGGGAG84GCCACT
GAATGGCACAGAAGGCCCTAACTTCTACGTGCCCTTCTCCAATGCGATGGGGGTGGTACGCAGCCCCTTCGAGTACCCACAGTACTACCTGGCTGGGCCATG	1	1e-05	0
GAATGGCACAGAAGGCCCTAACTTCTACGTGCCCTTCTCCAGTGCGATGGGTGTGGTACGCAGCCCCTTCGAGTACCCACAGTACTACCTGGCTGAGCCATG	1	1e-05	44A
GAATGGCACAGAAGGCCCTAACTTCTACGTGCCCTTCTCCAATGGGATGGGTGTGGTACGCAGCCCCTACGAGTACCCACAGTACTACCTGGCTGAGCCATG	1	1e-05	0
GAACGGCACAG-AGGCCC-AA-TT-TATGTGCCCTTCTCCAATGCGATGGGTGTGGTACGCAGCCCCTTCGAGTACCCACAGTACTACCTGGCTGAGCCATG	1	1e-05	14GC22TT43G
GAATGGCACAGAAGGCCCTAACTTCTACGTGCCCTTCTCCAATGCGATGGGTGTGGTACGCAGCCCCTTCGAGTACCCACAGTACTACCTGGCTGAGCCATG	1	1e-05	44TTGCCCGGGCGGCCTCAGTGAGCGAGCGAGCGCGCAGAGAGGGAGTGGCCAACTCCATCACTAGGGGTTCCTGCGGCTGT
GAATGGCACAGAAGGCCCTAACTTCTACGCGCCCTTCTCCAATGCGATGGGTGTGGTACGCAGCCCCTTCGAGTACCCACAGTACTACCTGGCTGAGCCATG	1	1e-05	44CA
GAATGGCACAGAAGGCCCTAACTTCTACGTGCCCTTCTCCAATGCGATGGGTGTGGTACGCAGCCCCTTCGAGTACCTACAGTACTACCTGGCTGAGCCATG	1	1e-05	44GGCCGGGCGGCCTCAGTGAGCGAGCGAGCGCGCAGAGAGGGAGTGGC
GAATGGCACAGAAGGCCCTAACTTCTACGTGCCCTTCTCCAATGTGATGGGTGTGGTACGCAGCCCCTTCGAGTACACACAGTACTACCTGGCTGAGCCATG	1	1e-05	0
GAATGGCACAGAAGGCCCTAACTTCTACGTGCCCTTCTCCAATGCGATGGGTGTGGTACGCAGCCCCTTCGAGTATCCACAGTACTACCTGGCTTAGCCATG	1	1e-05	0
GAATGGCACAGAAGGCCCTAACTTCTACGTGCCCTTCTCCAATGCG-TGGGTGTGGTACGCAGCCCCTTCGAGTACCCACAGTACTACCTGGCTGAGCCATG	1	1e-05	47C
GAATGGCACAGAAGGCCCTAACTTCTACGTGCCCTTCTCCAAT-CGATGGGTGTGGTACGCAGCCCCTTCGAGTACCCACAGTACTACCTGTCTGAGCCATG	1	1e-05	0
GAATGGCACAGAAGGCCCTAACTTCTACGTGCCCT-----------ATGGGTGTGGTACGCAGCCCCTTCGAGTACCCACAGTACTACCTGGCTGAGCCATG	1	1e-05	0
GAATGGCACAGCAGGCCCTAACTTCTACGTGCCCTTCTCCAA--CGATGGGTGTGGTACGCAGCCCCTTCGAGTACCCACAGTACTACCTGGCTGAGCCATG	1	1e-05	0
GAAGGGCACAGAAGGCCCTAACTTCTAAGTGCCCTTCTCCAATGCGATGGGAGTGGTACGCAGCCCCTTCGAGTACCCACAGTACTACCTGGCTGAGCCATG	1	1e-05	0
GAATGGCACAGAAGGCCCTAACTTCTACGTGCCCTTCT---A---GATGGGTGTGGTACGCAGCCCCTTCGAGTACCCACAGTACTACCTGGCTGAGCCATG	1	1e-05	0
GAACGGCACAGAAGGCCCTAACTTCTACGTGCCCTTCTCCAATGCCACGGGTGTGGTACGCAGCCCCTTCGAGCACCCGCAGTACTACCTGGCTGAGCCATG	1	1e-05	0
GACTGGCACAGAAGGCCCTAACTTCTACGTGCCCTTCTCCAATGCGATGGGTGTGGTACGCCGCCCCTTCGAGTACCCACAGTACTACCTGGCTGAGCCATG	1	1e-05	0
GAACGGCACAGAGGGCCC-AA-TT-TATGTGCCCTTCTCCAA--CGA--GGCGTGGT--GCAGCCCCTTCGAG--CCCGCAGTACTACCTGGC-GA-CCATG	1	1e-05	17A22TT44TCAC59GG74AG94GA
GAATGGCACAGAAGGCCCTAACTTCTACGTGCCCTTCTCCAATG-GATGGGTGTGGTACGCAGCCCCTTCGAGTACCCACAGTACTACCTGGCTGAGACATG	1	1e-05	0
GAACGGCACAG-AGGCCC-AA-TT-TATGTGCCCTTCTCCA--GCGA--GGCGTGGT--GCAGCCCCTTCGAG--CCCGCAGTACTACCTGGC-GA-CCATG	1	1e-05	14GC22TT44TCAC59GG74AG94GA
GAACGGCACAG-AGGCCC-AA-TT-TATGTGCCCTTCTCCAA--CGA--GGCGTGGT--GCAGCCCCTACGAG--CCCGCAGTACTACCTGGC-GA-CCATG	1	1e-05	14GC22TT44TCAC59GG74AG94GA
GGATGGCACAGAAGGCCCTAACTTCTACGTGCCCTTCTCCAATGCGATGGGTGTGGTACGCAGCCCCTTCGAGTACCCACAGTACTACCTGGCTGTGCCATG	1	1e-05	0
GAATGGCACAGAAGGCCCTAACTTCTACGTGCCCTTCTCCAATGCGATGGGTGTGGTACGCAACCCCTTCGAGTACCAACAGTACTACCTGGCTGAGCCATG	1	1e-05	0
GAATGGCACAGAAGGCCCTAACTTCTACGTGCCCTTCTCCAATGCGTTGGGCGTGGTACGCAGCCCCTTCGAGTACCCACAGTACTACCTGGCTGAGCCATG	1	1e-05	0
GAATGGCACAGAAGGCCCTAACTTCTCCGTGACCTTCTCCAAT-CGATGGGTGTGGTACGCAGCCCCTTCGAGTACCCACAGTACTACCTGGCTGAGCCATG	1	1e-05	0
GAATGGCACAGAAGGCCCTAACTTCTACGTGCCCTTCTCCAATGCGATGGGTGTGGTACGC--CCCCTTCGAGTACCCACAGTACTACCTGGCTGAGCCATG	1	1e-05	62TC
GAATGGCACAGAAGGCCCTAACTTCTACGTGCCC-TCTC----GCGATGGGTGTGGTACGCAGCCCCTTCGAGTACCCACAGTACTACCTGGCTGAGCCATG	1	1e-05	0
GAATGGCACAGAAGGCCCTAACTTCTACGCGCCCTTCTCCGATGCGATGGGTGTGGTACGCAGCCCCTTCGAGTACCCACAGTACTACCTGGCTGAGCCATG	1	1e-05	0
GAATGGCACAGAAGGCCCTAACTTCTACGTGCCCTTCTCCAATGCGACGGGTGTGGTACGCAGCCCCTTCGAGTACCCACAGAACTACCTGGCTGAGCCATG	1	1e-05	0
GAATGGCACAGAAGGCCCTAACTTCTACGTGCCCTTCTCCAATGCGACGGGTGTGGTACGCAGCCCCTTCGAGTACCCACAATACTACCT--CTGATCCATG	1	1e-05	89CG
GAATGGCACAGAAGGCCCTAACTTCTACGTGCCCTTCTCCAATGCGATGGGTGTGGTACGCAGCCCCTTCGAGTACCCACAGTACTACCTGGCTGAGCC--G	1	1e-05	100T
GAATGGCACAGAAGGCCCTGACTTCTACGTGCCCTTCTCCAACGCGATGGGTGTGGTACGCAGCCCCTTCGAGTACCCACAGTACTACCTGGCTGAGCCATG	1	1e-05	0
GAATGGCACAGAAGGCCCTAACTTCTACGTGTCCTTCTCCAATGCGATGGGAGTGGTACGCAGCCCCTTCGAGTACCCACAGTACTACCTGGCTGAGCCATG	1	1e-05	0
GAATGGCACAGAAGGCCCTAACTTCTACGTGCCCTTCTCCAATGCGATGGGTGTGGTACGCAGCCCCTTCGAGTACCCACAGTACTACCTGGCTGAGCCATG	1	1e-05	44ACCAAAGGTCGCCCGACGCCCGGGCTTTGCCCGGGCGGCCTCAGTGAGCGATCGAGCGCGC
GAATGGCACAGAAGGCCCTAACTTCTACGTGCCCTTCTCCAATGCGATGGGTGTGGTACGCAGCCCCTTCGAGTACCCACAGTACTACCTGGCTGAGCCATG	1	1e-05	44GCTCACTGAGGCCGC
GAATGGCACAGAAGGCCCTAACTTCTACGTGCCCTTCTCCAATGCGA--GGTGTGGTACGCAGCCCCTTCGAGTACCCACAGTACTACCTGGCTGAGCCATG	1	1e-05	46AC
GAATGGCACAGAAGGCCCTAACTTCTACGTGCCCTTCTCCAA-GCGATGGGTGTGGTACGAAGCCCCTTCGAGTACCCACAGTACTACCTGGCTGAGCCATG	1	1e-05	0
GAATGGCACAGAAGGCCCTAACTTCTACGTGCCCTTCTCCAATGCGATGGGTGTGGCACGCCGCCCCTTCGAGTACCCACAGTACTACCTGGCTGAGCCATG	1	1e-05	0
GAACGGCACAG-AGGCCC-AA-TT-TATGTGCCCTTCTCCAA--CGA--GGCGTGGT--GCAGCCCCTTTGAG--CCCGCAGTACTACCTGGC-GA-CCATG	1	1e-05	14GC22TT44TCAC59GG74AG94GA
GAATGGCACAGAAGGCCCTAACTTCTACGTGCCCTTCTCCAATGCGATGGGTGTGGTACGCAGCCCCTTCGAGTACCCACAGTACTACCTGGCTGAGCCATG	1	1e-05	41GGTCGCCCGGCCTCAGTGAGCGAGCGAGCGCGCAGAGAGGG83G86GCCAACTCCAT
GAATGGCACAGAAGGCCCTAACTTCTACGTGCCCTTCTCCAATGCGATGGGTGTGATACGCAGCCCCTTCGAGTACCCACAGTACTACCTGGCTGAGCTATG	1	1e-05	0
GAATGGCACAGAAGGCCCTAACTTCTACGTGCCCTTCT------CGATGGGTGTGGTACGCAGCCCCTTCGAGTACCCACCGTACTACCTGGCTGAGCCATG	1	1e-05	0
GAATGGCACAGAAGGCCCTAACTTCTACGTGCCCTTCTCCAAT--GATGGGTGTGGTACGCAGCCCCTTCGAGTACCCACAATACTACCTGGCTGAGCCATG	1	1e-05	0
GAATGGCACAGAAGGCCCTAACTTCTACGTGCCCTTCTCCAATGCGC-GGGTGTGGTACGCAGCCCCTTCGAGTACCCACAGTACTACCTGGCTGAGCCATG	1	1e-05	44T47CC
GAATGGCACAGAAGGCCCTAACTTCTACGTGCCCTTCTCCAATG---TGGGTGTGGTACGCAGCCCATTCGAGTACCCACAGTACTACCTGGCTGAGCCATG	1	1e-05	0
GAATGGCAAAGAAGGCCCTAACTTCTACGTGCCCTTCTCCAATGCGATGGGTGTGGTACGCACCCCCTTCGAGTACTCACAGTACTACCTGGCTGAGCCATG	1	1e-05	0
GAATGGCACAGAAGGCCCTAACTTCTACGTGCCCTTCTCCAATGCGATGGGTGTGGTACGCGGCCCCTTCGAGTACCCACAGTACTACCTGGCTGAGCCATG	1	1e-05	43GA
GAATGGCACAGAAGGCCCTAACTTCTACGTGCCCTTCTC-----CGATGGATGTGGTACGCAGCCCCTTCGAGTACCCACAGTACTACCTGGCTGAGCCATG	1	1e-05	0
GAATGGCACAGAAGGCCCTAACTTCTACGCGCCCTTCTCCAATGCGATGGGTGTGGTACGCAGCCCCTCCGAGTACCCACAGTACTACCTGGCTGAGCCATG	1	1e-05	0
GAATGGCACAGAAGGCCCTAACTTCTACGTGCCCTTCTCCAATGCGATGGGTGTGGTACACAGCCCCTTCGAGTACCCACAGTATTACCTGGCTGAGCCATG	1	1e-05	0
TAATGGCACAGAAGGCCCTAACTTCTACGTGCCCTTCTCCAATGAGATGGGTGTGGTACGCAGCCCCTTCGAGTACCCACAGTACTACCTGGCTGAGCCATG	1	1e-05	0
GAACGGCACAG-AGGCCC-AACTT-TATGTGCCCTTCTCCAA--CGA--GGCGTGGT--GCAGCCCCTTCGAG--CCCGCAGTACTACCTGGC-GA-CCATG	1	1e-05	14GC21T44TCAC59GG74AG94GA
GAATGGCACAGAAGGCCCTAACTTCTACGTGCCCTTCTCCAATGCGATGGGTGTGGTACGCAGCCCCTTCGAGTACCCACAGTACTACCTGGCTGAGCCATG	1	1e-05	44TTTGCCCGGGCGGCCTCAGTGAGCGAGCGAGCGCGCAGAGAGGGAGTGGCCA
GAATGGCACAGGAGGCCCTAACTTCTACGTGCCCTTCTCCAATGCGATGGGTATGGTACGCAGCCCCTTCGAGTACCCACAGTACTACCTGGCTGAGCCATG	1	1e-05	0
GAATGGCACAGAAGGCCCTAACTACTACGTGCTCTTCTCCAACGCGATGGGTGTGGTACGCAGCCCCTTCGAGTACCCACAGTACTACCTGGCTGAGCCATG	1	1e-05	0
GAACGGCACAG-AGGCCC-AA-TT-TATGTGCCCTTCTCCAA--CGA--GGCGTGGT--GCAGCCCCTTCGAGCACCCACAGTACTACCTGGCTGAGCCATG	1	1e-05	14GC22TT44TCAC59GG
GAATGGCACAGAAGGCCCTAACTCCTACGTGCCCTTCTCCAAT-CGATGGGTGTGGTACGCAGCCCCTTCGAGTACCCACAGTACTACCTGGCTGAGCCATG	1	1e-05	0
GAATGGCACAGAAGGCACTAACTTCTACGTGCCCT-------TGCGATGGGTGTGGTACGCAGCCCCTTCGAGTACCCACAGTACTACCTGGCTGAGCCATG	1	1e-05	0
GAATGGCACAGAAGGCCCTAACTTCTACGTGCCCTTCTCCAATGCGATGGGTGTGGTACGCAGCCCCTTCGAGTACCCACAGTACTACCAGGCTGAGCCATG	1	1e-05	44AAAGGTCGCCCGACGCCCGGGCTTTGCCCGGGCGGCCTCAGTGAGCGAGCGAGCGCGCAGAGAGGGAGTGGCCA
GAATGGCACAGAAGGCCCTAACTTCTACGTGCCCTTCTCCAATGCGATGGGTGTGGTACGCAGCCCCTTCGAGTACCCACAGTACTACCTGGCTGAGCCATG	1	1e-05	44TTGGCCACTCCCTCTCTGCGCGCTCGCTCGCTCACTGAGGCCGGGCGACCAAAGC
GAATGGCACAGAAGGCCCTAACTTCTACGTGCCCTTCTCCAATGCGATGGGTGTGGTACGCAGCACCTTCGAGTACCCACAGTACTACCTGGCTGAGCCATG	1	1e-05	43G
GAATGGCACAGAAGGCCCTAACTTCTACGTGCCCTTCTCCAATG-GATGGGCGTGGTACGCAGCCCCTTCGAGTACCCACGGTACTACCTGGCTGAGCCATG	1	1e-05	0
TAATGGCACAGAACGCCCTCACTTCTACGTGCCCTTCTCCAA--CGATGGGTGTGGTACGCAGCCCCTTCGAGTACCCACAGTACTACCTGGCTGAGCCATG	1	1e-05	0
GAATGGCACAGAAGGCCCTAACTTCTAAGTGCCCTTCTCCAATGCGATGGGTGTGGTACGCAGCCCCTTCGAGTACCCACAGTACTACCTGGCTGAGCCATG	1	1e-05	44C
GATTGGCACAGAAGGCCCTAACTTCTACGTGCCCTTCTCCAATGCGATGGGTGTGGTACGCAGCCCCTTCGTGTACCCACAGTACTACCTGGCTGAGCCATG	1	1e-05	0
GAATGGCACAGAAGGCCCTAACTTCTACGTGCCCTTCTCCAATGCGATGGGTGTGGTACGCAGCCCCTTCGAGTACCCACAGTACTACCTGGCTGAGCCATG	1	1e-05	49CGAT54T
GAATGGCACAGAAGGCCCTAACTTCTACGTGCCCTTCTCCAA--CGACGGGCGTGGTACGCAGCCCCTTCGAGCACCCGCAGTACTACCTGGCTGAGCCATG	1	1e-05	44CC
GAATGGCACAGAAGGCCCTAACTTCTACGCGCCCTTCTCCAATG-GATGGGTATGGTACACAGCCCCTTCGAGTACCCACAGTACTACCTGTCTGATCCATT	1	1e-05	0
GAATGGCACAGAAGGCCCTAACTTCTACGTGCCCTTCTCC-----------TGTGGTACGCAGCCCCTTCGAGTACCCACAGTACTACCTGGCTGAGCCATG	1	1e-05	0
CAAT--CACAGAAGTCCCTAACTTCTACGAGCCCTTCTCCAATGCGATGGGTGGGGTACGCAGCCCCTTCGAGTATCCACAGTACTACCTGGCTGAGCCATG	1	1e-05	4CC
GAATGGCACATAAGGCCCTAACTTCTACGTGCCCTTCT------CGATGGGTGTGGTACGCAGCCCCTTCGAGTACCCACAGTACTACCTGGCTGAGCCATG	1	1e-05	0
GAATGGCACAGAAGGCCCTAACTTCTACGTGCCCTTCTCCAA-GCGATGGGTGTGGTACGCAGCCCCTTCGAGTACCCACAGTACTACCTGGCTGAGCCATG	1	1e-05	40TTTGGTCGCCCGGCCTCGGTGAGCG66GCG
GAATGGCACAGAAGGCCCTAAATTCTACGTGCCCTTCTCCAATGCGCTGGGCGTGGTACGCAGCCCCTTCGAGTACCCACAGTACTACCTGGCTGAGCCATG	1	1e-05	0
#NAME?	1	1e-05	0
GAATGGCACAGAAGGCCCTAACTTCTACGTGCCCTTCTCCAAT-CGATGGGTGGGGTACGCAGCCCCTTCGAGTACCCACAGTACTACCTGGCTGAGCCATG	1	1e-05	0
GAATGGCACAGAAGGCCCTAACTTCTACGTGCCCTTCTCCAATGCGATGGGTGTGGTACGCAGCCCCTTCGAGTACCCACAGTACTACCTGGCTGAGCCATG	1	1e-05	43G55GGTACGCAGCCCCTTC
GAATGGCACAGAAGGCCCTAGCTTCTACGTGCCCTTCTCCAATGCGACGGGTGTGGTACGCAGCCCCTTCGAGTACCCACAGTACTACCTGGCTGAGCCATG	1	1e-05	0
GAATGGCACAGAAGGCCCTAACTTCTACGTGCCCTTCTCCAATGCGATGGGTGTGGTACGCAGCCCCTTCGGGTACCCACAGTACTACCTGGCTGGGCCATG	1	1e-05	0
GAATGGCACAGAAGGCCCTAACTTCTACGTGCCCTTCTCCAATGCGATGGGTGTGGTACGCACCCCCTTCGAGTACCCACAGTACTACCTGGCTGAGCCATG	1	1e-05	43G
GAATGGCACAGAAGGCCCTAACTTCTACGTGCCCTTCTCCAA--CGATGGGCGTGGTACGCAGCCCCTTCGAGTACCCACAGTACTACCTGGCTGAGCCATG	1	1e-05	0
GAACGGCACAG-AGGCCC-AA-TT-TATGTGCCCTTCTCCAA--CGA--GGCGTGGT--GCAGCCCCTTCGAG--CCCGCAGTACTACCTGGC-GA-CCAGG	1	1e-05	14GC22TT44TCAC59GG74AG94GA
GAATGGCACAGAAGGCCCTAACTTCTACGTGCCCTTCTCCAATGCGATGGGTGTGGTACGCAGCCCCTTCGAGTACCCACAGTACTACCTGGCTGAGCCATG	1	1e-05	44AAGCGTAATCTGGAACATCGTATGGGTAAGCGTAATCTGGAACATCGTATGGGTAAGCGTAATCTGGAACATCGTA
GAATGGCACAGAAGGCCCTAACTTCTACGTGCCCTTCTCCAATGCGATGGGTGTGGTACGCAGCCCCTTCGAGTACCCACAGTACTACCTGGCTGAGCCATG	1	1e-05	46CGCTCGCTCGCTCACTGAGGCCGGGCGACCA
GAATGGCACAGAAGGCCCTAACTTCTACGTGCCCTTCTCCAATG-GATGGGTGT-GTACGCAGCCCCTTCGAGTACCCACAGTACTACCTGGCTGAGCCATG	1	1e-05	0
GAATGGCACAGAAGGCCCTAACTTCTACGTGCCCTTCTCCAAT--GATGGGTGTGGTACGCAGCCCCTTCGAGTACCCACAGTACTACCTGGCTGAGCCACG	1	1e-05	0
GAACGGCACAG-AGGCCC-AA-TT-TACGTGCCCTTCTCCAA--CGACGGGCGTGGT--GCAGCCCCTTCGAG--CCCGCAGTACTACCTGGCGGAGCCATG	1	1e-05	14GC22TT44CC59GG74AG
GAATGGCACAGAAGGCCCTAACTTCTACGTGCCCTTCTCCAA-GCGATGGGTGTGGTACGCAGCCCCTTCGAGTACCCACAGTACTACCTGGCTGAGCCATG	1	1e-05	36GGTCGCCCGGC50AGTGAGCGAGCGAGCGCG70G
GAATGGCACAGAAGGCCCTAACTTCTACGTGCCCTTCTCCAAT----------TGGTACGCAGCCCCTTCGAGTACCCACAGTACTACCTGGCTGAGCCATG	1	1e-05	0
GAATGGCACAGAAGGCCCTAACTTCTACGTGCCCTTCTCCAATGCGATGGGTGTGGTACGCAGCCCCTTCGAGTACCCACAGTACTACCTGGCTGAGCCATG	1	1e-05	42GGCGACCTTTGGTCGCCCGGCCTCAGTGAGCGAGCGAGCGCGCAGAGAGGGAG97GCCAACTCCGTCAC
GAATGGCACAGAAGGCCCTACCTCCTACGGGCCCTCCTCCAATGCGATGGGTGTGGTACGCAGCCCCTTCGAGTACCCACAGTACTACCTGGCTGAGCCATG	1	1e-05	0
GAATAGCACAGAAGGCCCTAACTTCTACATGCCCTTCTCCAATGCGATGGGTGTGGTACGCAGCCCCTTCGAGTACCCACAGTACTACCTGGCTGAGCCATG	1	1e-05	0
GAATGGCACAGAAGGCCCTAACTTCTACGTGCCCTTCTCCAA--CGATGGGTGTGGTACGCAGCCCCTGCGAGTACCCACAGTACTACCTGGCTGAGCCATG	1	1e-05	0
GAATGGCACAGAAGGCCCTAACTTCTACGTGCCCTTCTCCAATGCGATGGGTGTGGTACGCAGCCCCTTCGAGTACCCACAGTACTACCTGGCTGAGCCATG	1	1e-05	42AGCCCGGGCGGCCTCAG61AGCGAGCGAGCGCGC
GAATGGCACAGAA-GCCCTAACTTCTACGTGCCC--CTCAAATGCGATGGGTGTGGTACGCAGCCCCTTCGAGTACCCACAGTACTACCTGGCTGAGCCATG	1	1e-05	16A31CA
GAATGGCACAGAAGGCCCTAACTTCTACGTGCCCTTCTCCAATGCGATGGGTGTGGTACGCAGCCCCTTCGAGTACCCACAGTACTACCTGGCTGAGCCATG	1	1e-05	44TGGCCACTCCCTCTCTGCGCGCTCGCT73CTC77C79GAGGCCGCCCG92CAAA
GAATGGCACAGAAGGCCCTAACTTCTACGTGCCCTTCTCCAATG-GATGGGTGTGGAAAGCAGCCCCTTCGAGTACCCACAGTACTACCTGGCTGAGCCATG	1	1e-05	0
GAATGGCACAGAAGGCCCTAACTTCTACGTGCCCTTCTCCAATG-------------------------------CCCACAGTACTACCTGGCTGAGCCATG	1	1e-05	0
GAATGGCACAGAAGGCCCTAACTTCTACGTGCCCTTCTCCAATGCGATGGGTGTGGTACGCAGCCCCTTCGAGTACCCACAGTACTACCTGGCTGAGCCATG	1	1e-05	43GCAGGAACCCCTAGTGATGGAGTTGGCCACTCCCTCTCTGCGCGCTCGCTCGCTCACTGAGGCCGG
GAATGGCACAGAAGGCCCTAACTTCTACGTGCCCTTCTCCAATG-GATGGGTGTGGTACGCAGACCCTTCGAGTACCCACAGTACTACCTGGCTGAGCCATG	1	1e-05	43GG
GAATGGCACAGAAGGCCCTAACTTCTACGTGCCCTTCTCCAATGCGATGGGTGTGGTACGCAGCCCCTTCGAGTACCCACAGTACTACCTGGCTGAGCCATG	1	1e-05	44GCGCTCGCTCGCTCACTGAGGCCGGGCGAC
GAATGGCACAGTAGGCTCTAACTTCTACGTGCCCTTCTCCAATGCGATGGGTGTGGTACGCAGCCCCTTCGAGTACCCACAGTACTACCTGGCTGAGCCATG	1	1e-05	0
GAATGGCACAGAAGGCCCTAACTTCTACGTGCCCTTCTCCAATGCGATGGGTGTGGTACGCAGCCCCTTCGAGTACCCACAGTACTACCTGGCTGAGCCATG	1	1e-05	44CCACTCCCTCTCTGCGCGCTCGCTCGCTCACTGAGGCCGGGCGACCC
GAATGGCACAGAAGGCCCTAACTTCTACGTGCCCTTCTCCAATGCGATGGGTGTGGTACGCAGCCCCTTCGAGTACCCACAGTACTACCTGGCTGAGCCATG	1	1e-05	43GGCGATG
#NAME?	1	1e-05	0
G-ATGGCACAGAAGGCCCTTACTTTTACG-G-CCTTCTCCCATGCGATGGGTGTGGTACGCAGCCCCTTCGAGTACCCACAGTACTACCTGGCTGAGCCATG	1	1e-05	27GG
GAATGGCACAGAAGGCCCTAACTTCTACGTGCCCTTCTCCAA--CGATGGGGGTGGT--GCAGCCCCTTCAAGTACCCACAGTACTACCTGGCTGAGCCATG	1	1e-05	57GA
GAATGGCACAGAAGGCCCTAACTTCTACGTGCCCTTCTCCAGTGCGATGGGTGTGGTACGCAGCCCCTCCGAGTACCCACAGTACTACCTGGCTGAGCCATG	1	1e-05	0
GAA--GCACAGAGGGCCCTAACTTCTACGTGCCCTTCTCCAATGCGATGGGTGTGGTACGCAGCCCCTTCGAGTACCCACAGTACTACCTGGCTGAGCCATG	1	1e-05	2AC
GAATGGCACAGAAGGCCATAACTTCTACGTGCCCTTCTCCAATGCGATGGGTGTGGTACGCAGCCCCTTCGAGTACCCACAGTACTACCTGGCTGAGCCATA	1	1e-05	44C
GAATGGCACAGAAGGCCCTACCTTCTACGTGCCCTTCTCCAATGCGATGGGGGTGGTACGCAGCCCCTTCGAGTACCCACAGTACTACCTGGCTGAGCCATG	1	1e-05	0
GAATGGCACAGAAGGCCCTAACTTCTACGTGCCCTTCTCCAATG------------------GCCCCTTCGAGTACCCACAGTACTACCTGGCCGAGCCATG	1	1e-05	0
GAATGGCACAGTAGGCTCTAACTTCTACGAGCCCTTCTCTAAT-CGATGGGTGTGGTACGCAGCCCCTTCGAGTACCCACAGTACTACCTGGCTGAGCCATG	1	1e-05	0
GAATGGCACAGAAGGCCCTAACTTCTACGTGCCCTTCTCCAATGCGATGGGTGTGGTACGCAGCCCCTTCGAGTACCCACAGTACTACCTGGCTGAGCCATG	1	1e-05	44GCCACTCCCTCTCTGCGCGCTCGCTCGCTCACTGAGGCCGGGC
GAATGGCACAGAAGGTCCTAACTTCTACGTGCCCTTCTCCAATGCGATGGGTGTGGTACGCAGACCCTTCGAGTACCCACAGTACTACCTGGCTGAGCCATG	1	1e-05	0
GAATGGCACAGAAGGCCCTAACTTCTACGTGCC-----CC--TGCGATGGGTGTGGTACGCAGCCCCTTCGAGTACCCACAGTACTACCTGGCTGAGCCATG	1	1e-05	0
GAATGGCACAGAAGGCCCTAACTTCTACGTGCCCTTCTCCAATGCGATGGGTGTGGTACGCAGACCCTTCGAGTACCCACAGTACTACCTGGCTGAGCCATG	1	1e-05	44C
GAATGGCACAGAAGGCCCTAACTTCTACGTGCCCTTCTCCAATG-GATGGGTGTGGTACGCAGCCCCTTCGAGTACCCACAGTACTACCTGGCTGAGCCATA	1	1e-05	0
GAATGGCACAGAAGGCCCTAAATTCTACGTGCCCTTCTCCAATGCGATGGGAGTGGTACGCAGCCCCTTCGAGTACCCACAGTACTACCTGGCTGAGCCATG	1	1e-05	0
GAATGGCACAGAAGGCCCTAACTTCTACGTGCCCTTCTCCAA--CGATGGGTGTGGTACGCACCCCCTTCGAGTACCCACAGTACTACCTGGCTGAGCCATG	1	1e-05	0
GACTGGCACAGAAGGCCCTAACTTCTACGTGCCCTTCTCCACTGCGATGGGTGTGGTACGCAGCCCCTTCGAGTACCCACAGTACTACCTGGCTGAGCCATG	1	1e-05	0
GAATGACACAGAAGGCCCTAACGTCTACGTGCCCTTCTCAAATGCGATGGGTGTGGTACGCAGCCCCTTCGAGTACCCACAGTACTACCTGGCTGAGCCATG	1	1e-05	0
GAATGGCACAGAAGGCCCTAACTTCTACGTGCCCTTC-CCAA--CGATGGGTGTGGTACGCAGCCCCTTCGAGTACCCACAGTACTACCTGGCTGAGCCATG	1	1e-05	36GGTCGCCCGACGC51GGG
GAATGGCACAGAAGGACCTAACTTCTACGTGCCCTTCTCCAATGCGATGGGTGTGGTACGCAGCCCCTTCGAGTACCCACAGTACTACCTGGCTGAGACATG	1	1e-05	0
GAATGGCACAGAAGGCCCTAACTTCTACGTGCCCTTCTCCAATGGGATGGGTGTGGTACGCAGCCCCTTCGAGTACCCACAGTTCTACCTGGCTGAGCCATG	1	1e-05	0
GAATGGCACAGAAGGCCCTACCTTCTACGTGCCCTT--------CGATGGGTGTGGTACGCAGCCCCTTCGAGTACCCACAGTACTACCTGGCTGAGCCATG	1	1e-05	0
GAATGGCACAGAAGGCCCTAACTTCTATGTGCCCTTCTCCAATG-GATGGGTGTGGTACGCAGCCCCTTCGAGTACCCACAGTACTACCTGGCTGAGCCATG	1	1e-05	0
GAATGGCACAGAAGGCCCTAACTTCTACGAGCCCTTCTCCAATGCGATGGGTGTGGTATGCAGCCCCTTCGAGTACCCACAGTACTACCTGGCTGAGCCATG	1	1e-05	0
GAATGGCACAGAAGGCCCTAACTTCTACGTGCCCTTCTCAAATGCGATGGGTGTGGTACGCAGCCCCTTCGAGTACCCACAGTACTACCTGGCTGAGCCATG	1	1e-05	44C
GAATGGCACAGAAGGCCCTAACTTCTACGTGCCCTTCTCCAA--C------------ACCCAGCCCCTTCGAGTACCCACAGTACTACCTGGCTGAGCCATG	1	1e-05	0
GAATGGCACAGAAGGCCCTAACTTCTACGTGCCCTTCTCCAATGCGATGGGTGTGGTACGCAGCCCCTTCGAGTACCCACAGTACTACCTGGCTGAGCCATG	1	1e-05	44CGTCGGGCTTTGGTCGCCCGGCCTCAGTGAGCGAGCGAGCGCGCAGAGAGGGAGTGGCCA
GAATGGCACAGAAGGCCCTAACTTCTACGTGCCCTTCTCCAATGCGATGGGTGTGGCACGCAGCCCCTTCGCGTACCCACAGTACTACCTGGCTGAGCCATG	1	1e-05	0
GAATGGCACAGAAGGCCCTAACTTCTACGTGCCCTTCTCCAATGCGATGGGTGTGGTACGCAGCCCCTTCGAGTACCCACAGTACTACCTGGCTGAGCCATG	1	1e-05	44TCGCCCGGGCGGCCTCAGTGAGCGAGCGAGCGCGCAGAGAGGGAGTGGCCAACTCCATCACTAGGGGTTCCTGCGGCCGCAAAAA
GAATGGCACAGAATGCCCTAACTTCTACGTGCCCTTCTCCAATGCGATGGGTGTGGTACGCGGCCCCTTCGAGTACCCACAGTACTACCTGGCTGAGCCATG	1	1e-05	0
GAATGGCACAGAAGG-CCTAACTTCCACG-G-CCTTCT-CAATGCGATGGGTGTGGTACGCAGCCCCTTCGAGTACCCACAGTACTACCTGGCTGAGCCATG	1	1e-05	27CG35C
GAATGGCACAGAAGGCCCTAACTTCTACGTGCCCTTCTCCAATG----------GG-------------------------GTACTACCTGGCTGAGCCATG	1	1e-05	0
GAATGGCACAGAAGGCCCTAACTTCTACGTGCCC--CTCC----CGATGGGTGTGGTACGCAGCCCCTTCGAGTACCCACGGTACTACCTGGCTGAGCCATG	1	1e-05	37T
GAATGGCACAGAAGGCCCTAACTTCTACGTGCCCTTCTCCAAT--GATGGGTGTGGTACGCAGCCTCTTCGAGTACCCACAGTACTACCTGGCTGAGCCATG	1	1e-05	0
GAATGGCACAGAAGGCCCTAACTTCTACGTGCCCTTCT--------------------CGCAGCCCCTTCGAGTACCCACAGTACTACCTGGCTGAGCCATG	1	1e-05	0
GAATGGCACAGAAGGCCCTAACTTCTACATGCCCTTCTCCAATGCGATGGGTGTGGTACGCAGCCCCTTCGAGTACCCACAGTACTACCTGGCTGAGTCATG	1	1e-05	0
GAATGGCACAGAAGGCCCTAACTTCTACGTGCCCTTCTCCAA------------------------------------------------------------	1	1e-05	0
GAATGGCACAGAAGGCCCTAACTTCTACGTGCCCTTCTCCAATGCGATGGGTGGGGTATGCAGCCCCTTCGAGTACCCACAGTACTACCTGGCTGAGCCATG	1	1e-05	0
GAATGGCACAGAAGGCCCTAACTTCTACGTGCCCTTCTCCAATGCGATGGGTGTGGTACGCAGCCCCTTCGAGTACCCACAGTACTACCTGGCTGAGCCATG	1	1e-05	44GCAAAGCCCGGGCGTCGGGCGACCTTTGGTCGCCCGGCCTCAGTGAGCGAGCGAGCGCGCAGAGAGGGAGTGGCC
GAACGGCACAG-AGGCCCT---TT-TATGTGCCCTTCTCCAA--CGA--GGCGTGGT--GCAGCCCCTTCGAG--CCCGCAGTACTACCTGGC-GA-CCATG	1	1e-05	14GC19GAT44TCAC59AG74AG94GA
GAATGGCACAGAAGGCCCTAACTTCTACGTACCCTTCTCCAA--CGATGGGTGTGGTACGCAGCCCCTTCGAGTACCCACAGTACTACCTGGCTGAGCCATG	1	1e-05	41AC
GAATGGCACAAAAGGCCTTAACTTCTACGTG-CCTTC-CCAATGCGATGGGTGTGGTACGCTGCCCCTTCGAGTACCCACAGTA-TACCTGGCTGAGCCATG	1	1e-05	35TC85A
GAATGTCACAGAAGGCCCTAACTTCTACGTGCCCTTCTCCAATGCGATGGGCGTGGTACGCAGCCCCTTCGAGTACCCACAGTACTACCTGGCTGAGCCATG	1	1e-05	0
GAATGGCACAGAAGGCCCTAACTTCTACGTGCCCTTCTCCAATG---T-GGTGTGGTACGCAGCCCCTTCGAATACCCACAGTACTACCTGGCTGAGCCATG	1	1e-05	0
GAATGGCACAGAAGGCCCTAACTTCTACGTGCCCTTCTCCAATGCGACGGGTGTGGTACGCAGCCCTTTCGAGTACCCACAGTACTACCTGGCTGAGCCATG	1	1e-05	0
GAATGGCACAGAAGGCCCTAACTTCTACGTGCCCTTCTCCAATG-GATGGGTGTGGTACGCACCCCCTTCGAGTACCCACAGTACTACCTGGCTGAGCCATG	1	1e-05	0
TAATGGCACAGAAGGCCCTAACTTCTACGTGCCCTTCTCCAATGCGACGGGCGTGGTACGCAGCCCCTTCGAGTACCCACAGTACTACCTGGCTGAGCCATG	1	1e-05	0
GAATGGCACAGAAGGCCCT--CTT-T-CGTGCCCGTCTCCAATG-GATGGGTGTGGTACGCAGCCCCTTCGAGTACCTACAGTATTACCTGGCTGAGCTATG	1	1e-05	18T21TT29G
GAATGGCACAGAAGGCCCTAACTCCTACGTGCCCTCCTCCAATGCGATGGGCGTGGTACGCAGCCCCTTCGAGTACCCACAGTACTACCTGGCTGAGCCATG	1	1e-05	0
GATTGGCACAGAAGGCCCAAACTTCTACGTGCCCTTCTCCAATGCGACGGGTGTGGTACGCATTCCCTTCGAGTACCCACAGTACTACCTGTCTGAGCCGTG	1	1e-05	0
GTATGGCACAGAAGGCCCTAACTTCTACGTGCCCTTCTCCAATG-GATGGGTGTGGTACGCAGCCCCTTCGAGTACCCACAGTACTACCTGGCTGAGCCATG	1	1e-05	0
GAATGGCACAGTAGGCCCTAACTTCTACGTGCCCTTCTCCAATGCGACGGGTGTGGTACGCAGCCCCTTCGAGTACCCACAGTACTACCTGGCTGAGCCATG	1	1e-05	0
GAATGGCACAGAAGGCCCTAACTTCTACGTGCCCTTCTCCAATGCGATGGGTGTGGTACGCAGCCCCTTCGAGTACCCACAGTACTACCTGGCTGAGCCATG	1	1e-05	48GGGTGTG
GAATGGCACAGAAGGCCCTAACTTCTACGTGCCCTTCTCCAATGCGACGGGTGTGGTACGCAGCCCCTTCGAGTACCCGCAGTACTACCTGGCTGAGCCATG	1	1e-05	0
GAATGGCACAGAAGGCCCTAACTTCTACGTGCCCTTCTCCAATGCGATGGGTGTGGTACGCAGCCCCTTCGAGTACCCACAGTACTACCTGGCTGAGCCATG	1	1e-05	44CGCCCGGCCTCAGTGAGCGAGCGAGCGCGCAGAGAGGGAGTGGC
GAATGGCACAGAAGGCCCTAACTTCTACGTGCCCTTCTCCAATG-GATGGGTGTGGTACGCAGCCCCTTCGAGTACCCACAGTACTACCT-GC-GAGCCATG	1	1e-05	90AC
GAATGGCACAGAAGGCCCTAACTTCTACGTGC-----------------------GTACGCAGCCCCTTCGAGTACCCACAGTACTACCTGGCTGAGCCATG	1	1e-05	0
GAATGGCACAGAAGGCCCTAACTTCGACGTGCCCTTCTCCAATGCGATGGGTGTGGTACGCAGCCCCTTCGAGTACCCACAGTACTACCTGGCTGAGCCATG	1	1e-05	0
GAATGGCACAGAAGGCCCTAACTTCTACGTGCCCTTCTCCAATGCGATGGGTGTGGTACGCAGCCCCTTCGAGTACCCACAGTACTACCTGGCTGAACCATG	1	1e-05	43G
GAATGGCACAGAAGGCCCTACCTTCTACGTGCCCTTCTCCAATGCGATGGGTGTGGCACGCAGCCCCTTCGAGTACCCACAGTACTACCTGGCTGAGCCATG	1	1e-05	0
GAATTGCACAGAAGGCCCTAACTTCTACGTGCCCTTCTCCAATGCGATGGGTGTGGTACGCAGCCCCTTCGAGTACCCACAGTACTGCCTGGCTGAGCCATG	1	1e-05	0
GAATGGCACAGAAGGCCCTAACTCCTACGTGCCCTTCTCCAATGCGTTGGGTGTGGTACGCAGCCCCTTCGAGGACCCAAAGTACTACCTGGCTGAGCCATG	1	1e-05	0
GAATGGCACAGAAGGCCCTAACTTCTACGTGCCCTTCCCCAATGCGATGGGGGTGGTACGCAGCCCCTTCGAGTACCCACAGTACTCCCTGGCTGAGCCATG	1	1e-05	0
GAATGGCACAGAAGGCCCTAACTTCTACGTGCCCTTCTCCAATGCGACGGGTGTGGTACGCAGCCCCTTCGAGGACCCACAGTACTACCGGGCTGAGCCATG	1	1e-05	0
GAATGGCACAGAAGGCCCTAACTTCTACGTGCCCTTCTCCGATGCGATGGGTGTGGTACGCAGCCCCTTCGAGTACCCACAGTACTGCCTGGCTGAGCCATG	1	1e-05	0
GAATGGCACAGAAGGCCCTAACTTCTACGTGCCCTTCT----T-CGATGGGTGTGGTACGCAGCCCCTTCGAGTACCCACAGTACTACCTGGCTGAGCCATG	1	1e-05	0
GAATGGCACAGAAGGCCCTAACTTCTACGTGCCCTTCTCCAATG---TGGGTGTGGAACGCAGCCCCTTCGAGTACCCACAGTACTACCTGGCTGAGCCATG	1	1e-05	0
GAATGGCACAGAAGGCCCTAACTTCTACGTGCCCTTCTCCAATGCGATGGGTGTGGTACACAGCCCCTTCGGGTACCCACAGTACTACCTGGCTGAGCCATG	1	1e-05	0
GAATGGAACAGAAGGCCCTAACTCCAACGGGCCCTTCTCCAATGCGATGGGTGTGGTACGCAGCCCCTTCGAGTACCCACAGTACTACCTGGCTGAGCCATG	1	1e-05	0
GAATGGCACAGAAGGCCCTAACTTCTACGTGCCCTTCTCCAATGCGATGGGTGTGGTACGCAGCCCCTTCGAGTACCCACAGTACTACCTGGCTGAGCCATG	1	1e-05	11A
GAACGGCACAG-AGGCCC-AA-TT-TATGTGCCCTTCTCCAA--CGA---GTGTGG--CG--GCCCCTTCGAG--CCCGCAGTACTGCCTGGC-GA-CCATG	1	1e-05	14GC22TT44TCAC51C55TT61AT74AG94GA
GAATGGCACAGAAGGCCCTAACTTCTACGTGCCCTTCTCCAATGCGATGGGTGTGGTACGCAGCCCCTTCGAGTACCCACAGTACTACCTGGCTGAGCCATG	1	1e-05	43GGGGTCGCCCGGCCTCAGTGAGCGAGCGAGCGCGCAGAGAGGGAGTGGCCAAC
GAATGGCACAGAAGGCCCTAACTTCTACGTGCCCTTCTCCAAT--GATGGGTGTGGTACGCAGCCCCTTCGAGTACCCACAGTACTACCTGGCTGAGCCATT	1	1e-05	0
GAATGGCACAGAAGGCCCTAACTTCTACGTGCCCTTCTCCAAT-CGATGGGTGTGGTACGCAGCACCTTCGAGTACCCACAGTACTACCTGGCTGAGCCATG	1	1e-05	0
GAATGGCACAGAAGGCCCTAACTTCTACGTGCCCTTCTCCAATGCGATGGGTGTGGTACGCAGCCCCTTCGAGTACCCACAGTACTACCTGGCTGAGCCATG	1	1e-05	42GGCGGCCTCAGTGAGCGAGCGAGCGCGCAGAGAGGGAGTGGCCAACTCCATCACTAGGGGTTCC
GAATGGCACAGAAGGCCCTAACTTCTACGTGCCCTTCTCCAATGCGATGGGTGTGGTACGCAGCCCCTTCGAGTACCCACAGTACTACCTGGCTGAGCCATG	1	1e-05	43GGACGCCCGGGCGGCCTCAGTGAGCGAGCGAGCGCGCAGAGAGGGAGTGGCCAACTCCATCACTAGGGGTTCCTGCGGCCTCTAGACTCGA
GAATGGCACAG-AGGCCCTAACTTCTACGTGCCCTTTTCCAATGCGATGGGTGTGGTACGCAGCCCCTTCGAGTACCCACAGTACTACCTGGCTGAGCCATG	1	1e-05	0
GAATGGCACAGAAGGTCCTAACTTCTACGTGCCCTTCTTCAATGCGATGGGTATGGTACGCAG--CCTTCGAGTACCCACAGTACTACCTGGCTGAGCCATG	1	1e-05	65AT
GAATGGCACAGAAGGCCCTAACTTCTACGTGCCCTTCTCCAATG-GATGGGTGTGGTACGCAACCCCTTCGAGTACCCACAGTACTACCTGGCTGAGCCATG	1	1e-05	0
GAATGGCACAGAAGGCCCTAACTTCTACGTGCCCTTCTCCAATGCGATGGGTGTGATACGTAGCCCCTTCGAGTACCCACAGTACTACCTGGCTGAGCCATG	1	1e-05	0
GAATGGCACAGAAGGCCCTAACTTCTACGTGCCCTTCTCCAATGCGATGGGTGTGGTACGCAGCCCCTTCGAGTACCCACAGTACTACCTGGCTGAGCCATG	1	1e-05	43TGCCCGGGCGTCGGGCGACCTTTGGTCGCCCGCCCTCAGTGAGCGATCGAGCGC98C
GAATGGCACAGAAGGCCCTAACTTCTACGTGCCCTTCTCCAATGGGATGGGCGTGGTACGCAGCCCCTTCGAGTACCCACAGTACTACCTGGCTGAGCCATG	1	1e-05	0
GAATGGCACAGAAGGCCCTAACTTCTACGTGCCCTTCTCCAATGCGATGGGTGTGGTACGCAGCCCCTTCGAGTACCCACAGTACTACCTGGTTGAGCCATG	1	1e-05	43GTCGCCCGGGCAAAGCCCGGGCGTCGG74CCTT81TCGCCCGGCCTCA96GAGCGAGCGAGCGCGCAGCGATGGGG
GAATGGCACAGAAGGCCCTAACTTCTACGTGCCCTTCTCCAATGCGATGGGAGTGGCACGCAGCCCCTTCGAGTACCCACAGTACTACCTGGCTGAGCCATG	1	1e-05	0
GAATGGCACAGAAGGCCCTAACTTCTACGAGCCCTTCTCCAATGCGATGGGTGTGGGACGCAGCCACTTCGAGTACCCACAGTACTACCTGGCTGAGCCATG	1	1e-05	0
GAATGGCACAGAAGGCCCTAACTTCTACGTGCCCTTCTCCAA--CGATGGGTGTGGTACGCATCCCCTTCGAGTACCCACAGTACTACCTGGCTGAGCCATG	1	1e-05	0
GAATGGCACAGAAGGCCCTAACTTCTACGCGCCCTTCTCCAATGAGATGGGTGTGGTACGCAGCCCCTTCGAGTACCCACAGTACTACCTGGCTGAGCCATG	1	1e-05	0
GAACGGCACAG-AGGCCC-AA-TT-TATGTGCCCTTCTCCAA--CGA--GGCGTGGT--GCAGCCCCTTCGAG--CCCGCAGTGCTACCTGGC-GA-CCATG	1	1e-05	14GC22TT44TCAC59GG74AG94GA
GAATGGCACAGAAGGCCCTAACTTCTACGTGCCCTTCTCCAATGCGATGGGTGTGGTACGCAGCCCCTTCGAGTACCCACAGTACTACCTGGCTGAGCCATG	1	1e-05	46CT
GAATGGCACAGAAGGCCCTAACTTCTACGTGCCATTCTCCAATGCGATGGGTGTGGTACGCAGCCCCTTCGAGTACCCACAGTACTACCTGGCTGAGCCATG	1	1e-05	44GATCCCTGGATATGGCACTTCCTTGGTTGTGAGGT
GAATGGCACAGAAGGCCCTAACTTCTACGTGCCCTTCTCCAATGC-A-GGGTGTG---CGCAGCCCCTTCGAGCACCCGCAGTACTACCTGGC-GA-CCATG	1	1e-05	44TCA51C54G94GA
GAATGGCACAGAAGGCCCTAACTTCTACGTGCCCTTCTCCAATGCGATGGGTGTGGTACGCAGCCCCTTCGAGTACCCACAGTACTACCTGACTGAGCCATG	1	1e-05	43G
GAACGGCACAGAGGGCCCTAACTTCTACGTGCCCTTCTCCAATGCGATGGGTGTGGTACGCAGCCCCTTCGAGTACCCACAGTACTACCTGGCTGAGCCATG	1	1e-05	43G
GAATGGCACAGAAGGCCCTAACTTCTACGTGCCCTTCTCCAATGCGATGGGTGTGGTACGCAGCCCCTTCGAGTACCCACAGTACTACCTGGCTGAGCCATG	1	1e-05	44CCCGGGCGGCCTCAGTGAGCGAGCGAGCGCGCAGAGAGGGAGTGGCCAACTCCA
GAATGGTACAGAAGGCCCTAACTTCTACGTGCCCTTCTCCAATGCGATGGGTGTGGTACGCAGCTCCTTCGAGTACCCACAGTACTACCTGGCTGAGCCATG	1	1e-05	0
GAATGGCACAGAAGGCCCTAACTTCTACGTGCCCTTCTCCAATGCGATGGGTGTGGTACGCAGCCCCTTCGAGTACCCACAGTACTACCTGGCTGAGCCATG	1	1e-05	43G64C
GAATGGAACAGAAGGCCCTAACTTCTACGTGCCCTTCTCCAATGCGATGGGTGTGGTACGCAGCCCCTTCGAGTACCCACAGTACTACCTGGCTGAGCCATG	1	1e-05	44C
GAATGGCACAGAAGGCCCTAACTTCTACGTGCCCTTCTCCAAT-CGATGGGTGTGGTACGCAGCCCCTTCGAGTACCCACAGTACTACCTGGCTGAGCCATT	1	1e-05	0
GAATGGCACAGAAGGCCCTAACTTCTACGTGCCCTTCTCCAATGCGATGGGTGTGGTACGCAGCCCCTTCGAGTACCCACAGTACTACCTGGCTGAGCCATG	1	1e-05	44CCGGGCGGCCTCAGTGAGCGAGCGAGCGCGCAGAGAGGGAGTGGCCAA
GAATGGCACAGAAGGCCCCAACTTCTACGTGCCCTTCTCCAATGC---GGGTGTGGTACGCAGCCCCTCCGAGTACCCACAGTACTACCTGGCTGAGCCATG	1	1e-05	44A
GAATGGCAAAGAAGGCCCTAACTTCTACGTGCCCTTCACCAATGCGATGGGTGTGGTACGCAGCCCCTTCGAGTACCCACAGTACTACCTGGCTGAGCCATG	1	1e-05	0
GAATGGCACAGAAGGCCCTAACTTCTACGTGCCCTT--------CGATGGGTGTGGTACGCAGCCCCTTCGAGTACCCACAGTGCTACCTGGCTGAGCCATG	1	1e-05	0
GAACGGCACAG-AGGCCC-AA-TT-TATGTGCCCTTCTCCAA--CGA--GGCGTGGT--GCAGCCCCTTCGAG--CCCGCAGTACTACCTGGC-GA-CCATG	1	1e-05	14AC22TT44TCAC59GG74AG94GA
GAATGGCACAGAAGGCCCTAACTTCTACGTGCCCTTCTCCAATGCGATGGGTGTGGTACGCAGCCCCTTCGAGTACCCACAGTACTACCTGGCTGAGCCATG	1	1e-05	43AAAGGTCGCCCGACGCCCGGGCTTTGCCCGGGCGGCCTCAGTGAGCGAGCGAGC100CAGAGAGGGAGTGGCCAA
GAATGGCACAGAAGGCCCTAACTTCTACGTGCCCTTCTCCAATGCGACGGGTGTGGTACGCAGCCCC-TCGAGTACCCACAGTACTACCTGGCTGAGCCATG	1	1e-05	0
GATTGGCACAGAAGGCCCTAACTTCTACGTGCCCTTCTCCAATGCGACGGGTGTGGTACGCAGCCCCTTCGAGTACCCACAGTACTACCTGGCTGAGCCATG	1	1e-05	0
GAATGGCCCAGAAGGCCCTAACTTCTACGTGCCCTTCTCCAATGCGCCGGGTGTGGTACGCAGCCCCTTCGAGTACCCACAGTACTACCTGGCTGAGCCATG	1	1e-05	0
GAATGGCACAGAAGGCCCTAACTTCTACGTGCCCTTCTCCAATGCGATGGGTGTGGTACGCAGCCCCTTCGAGTACCCACAGTACTACCTGGCTGAGCCATG	1	1e-05	44CTTGGCCACTCCCTCTCTGCGCGCTCGCTCGCTCACTGAGGACGCC
GAATGGCACAGAAGGCCCTAACTTCTACGTGCCCTTCTCCAAT--GATGTGTGTGGTACGCAGCCCCTTCGAGTACCCACAGTACTACCTGGCTGAGCCATG	1	1e-05	0
GAATGGCACAGAAGGCCCTAACTTCTACGTGCCCTTCTCCAATGCGATGGGTGTGGTACGCAGCCCCTTCGAGTACCCACAGTACTACCTGGCTGAGCCATG	1	1e-05	39ACGGGCGTCCTCAGTGAGCGAGCGAGCGCG71GAGAGGG79G82GCCAACT
GAATGGCACAGAAGGCCCTAACTTCTACGTGCCCTTCTCCAATGCGATGGGTGTGGTACGCAGCCCCTTCGAGTACCCACAGTACTACCTGGCTGAGCCATG	1	1e-05	44GTGGTCGCCCGGCCTCAGTGAGCGAGCGAGCGCGCAGAGAGGGAGTGGCCAACTCCATCACTAGGGGTTCCTGCGGCCTCTAGACTCGAGGGGCAGAGCGCA
GAATGGCACAGAAGGCCCTAACTTCTACGTGCCCTTCTCCAATGTGATGGGTGTGGTACGCAGCCCCTTCGAGTACCCACAGTACTACCTGGCTGATCCATG	1	1e-05	0
GAACGGCACAGGAGGCCCTAACTTCTACGTGCCCTTCTCCAATGCGATGGGTGTGGTACGCAGCCCCTTCGAGTACTCACAGTACTACCTGGCTGAGCCATG	1	1e-05	43G
GAATGGCACAGAAGGCCCTAAC----------------------C------TGTGGTACGCAGCCCCTTCGAGTACCCACAGTACTACCTGGCTGAGCCATG	1	1e-05	0
GAATGGCACAGAAGGCCCTAACTTCTACGTGCCCTTCTCCAATGCGATGGGTGTGGTACGCAGCCCCTTCGAGTACCCACAGTACTACCTGGCTGAGCCACG	1	1e-05	43TTTTGGTCGCCCGGCCTCAGTGAGCGAGCGAGCGCGCAGAGAGGGAGTG93CCAA
GAATGGCACAGAAGGCCCTAACTTCTACGTGCCCTCCTCCAA-GCGATGGGTGTGGTACGCAGCCCCTTCGAGTACCCACAGTACTACCTGGCTGAGCCATG	1	1e-05	41TTG
GAATGGCACAGAAGGCCCTAACTTCTACGTGCCCTTCTCCAATGCGATGGGTGTGGTACGCAGCCCCTTCGAGTACCCACAGTACTACCTGGCTGAGCCATG	1	1e-05	34CGACGCCCGGGCT49GCCCGGGCGGC63AGTGAGCGAGCGAGCGCG83GAGAGGG91G94GCCA
GAATGGCACAGAAGGCCCTAACTTCTACGTGCCCTTCTCCA------------T-GTACGCAGCCCCTTCGAGTACCCACAGTACTACCTGGCTGAGCCATG	1	1e-05	0
GAATGGCACAGAAGGCCCTAACTTCTACGTGCCCTTCTCCAAT-CGATGGGTGTGGTACGCAGCCCCTTCGAGTACCTACAGTACTACCTGGCTGAGCCATG	1	1e-05	0
GAATGGCACAGAAGGCCCTAACTTCTACGTGCCCTTCTCCAATG---TGGGTGTGGTACGCAGCCCCTTCGAGTACCCACAGAACTACCTGGCTGAGCCATG	1	1e-05	0
GAATGGCACAGAAGGCCCTAACTTCTACGTGCCCTTCTCCAAT--GATGGGTGTGGTACGCAGCCCCTTCGAGTA-CCACAGTACTACCTGGCTGAGCCATG	1	1e-05	0
GAATGGCACAGAAGGCCCTCACTTCTACGTGCCCTTCTCCAATGCGATGGGTGGGGTACGCAGCCCCTTCGAGTACCCACAGTACTACCTGGCTGAGCCATG	1	1e-05	0
GAATGGCACAGAAGGCCCTAACTTCTACGTGCCCTTCTCC-------------TGGTACGCAGCCCCTTCGAGTACCCACTGTACTACCTGGCTGAGCCATG	1	1e-05	0
GAATGGCACAGAAGGCCCTAACTTCTACGTGCCCTTCTCCAATGCGATGGGTGTGGTACGCAGCCCCTTCGAGTACCCACAGTACTACCTGGCTGAGCCATG	1	1e-05	44CGACCTTTGGTCGCCCGGCCTCAGTGAGCGAGCGAGCGCGCAGAGAGGGAGT
GAATGGCACAGAAGGCCCTAACTTCTACGTGCCCTTCTCCAATGCGATGGGTGTGGTACGCAGCCCCTTCGAGTACCCACAGTACTACCTGGCTGAGCCATG	1	1e-05	43GTGGCCACTCCCTCTCTGCGCGCTCGCTCGCTCACTGAGGCCGG
GAATGGTACAGAAGGCCCTAACTTCTACGTGCCCTTCTCCAATGCGATGGGTGTGGTACGCAGCCCCTTCGAGTACCCACAGTACTACCTGGCTGAGCCATG	1	1e-05	44T
GAATGGCACAGAAGGCCCTAACTTCTACGTGCCCTTCTCCAATGCGACGGGTGTGGTACGCAGCCCCTTCGAGTACCCACAGTGCTACCTGGCTGAGCCATG	1	1e-05	0
#NAME?	1	1e-05	0
GAATGGCACAGAAGGCCCTCACTTCTACGTGCCCTTCTCCAATGCGATGGGTGTGGTACGCAGCCCCTTCGAGTACCCACTGTACTACCTGGCTGAGCCATG	1	1e-05	0
GAATGGCACAGAAGGCCCTAACTTCTACGTGCCCTTCTCCAATGCGATGGGTGTGGTACGCAGCCCCTTCGAGTACCCACAGTACTACCTGGCTGAGCCATG	1	1e-05	44GCTACTCCCTCTCTGCGCGCTCGCTCGCTCACTGAGGCCGCC
GAAT--CACAGAACGCCCTAACTTCTACGTGCCCTTCTCCAATGCGATGGGCGTGGTACGCAGCCCCTTCGAGTACCCACAGTACTACCTGGCTGAGCCGTG	1	1e-05	3CG
GAATGGCACAGAAGGCCCTAACTTCTACGTGCCCTTCTCCAAT-CGATGGGTGTGGT--GCAGCCCCTTCGAGTACCCACAGTACTACCTGGCTGAGCCATG	1	1e-05	58GA
GAATGGCAC---AGGCCC---C-TCTACGAGCCC-GCTCCAA--CGATGGGTGTGGTACGCAGCCCCTTCGAGTACCCACAGTACTACCTGGCTGAGCCATG	1	1e-05	11TC16CGG23AG26G28G34GAG38G42AGAGAGGGAG53GG
GAATGGCACAGAAGGCACTAACTTCTACGTGCCCTTCTCCAA-GCGATGGGTGTGGTACGCAGCCCCTTCGAGTACCCACAGTACTACCTGGCTGAGCCATG	1	1e-05	0
GAATGGCACAGAAGGCCCTAACTTCTACGTGCCCTTCTCCAATGCGATGGGTGTGGTACGCAGCCCCTTCGAGTACCCACAGTACTACCTGGCTGAGCCATG	1	1e-05	44CTGCGCGCTCGCT59CTC63C65GAGGCCGCCCGGGCAAA
GAATGGCACAGATGGCCCCAACTTCTACGTGCCCTTCTCCAATGCGATGGGTGTGGTACGCAGCCCCTTCGAGTACCCACAGTACTACCTGGCTGAGCCATG	1	1e-05	0
GAATGGCACAGAAGGCCCTAACTTCTACGTGCCCTTC----------TGGGTGTGGTACGCAGCCCCTTCGAGTACCCACAGTACTACCTGGCTGAGCCATG	1	1e-05	0
GAATGGCACAGAAGGCCCTAACTTATACGTGCCCTTCTCCAA--CGATGGGTGTGGTACGCAGCCCCTTCGAGTACCCACAGTACTACCTGGCTGAGCCATG	1	1e-05	0
GAATGGCACAGAAGGCCCTAACTTCTACGTGCCCTTCTCCAATGCGATGGGTGTGGTACGCAGCCCCTTCGAGTACCCACAGTACTACCTGGCTGAGCCATG	1	1e-05	44TTCGCCACTCCCTCTCTGCGCGCTCGCTCGCTCACTGAGGCCGCCCGGGCT
GAATGGTACAGAAGGCCCTAACTTCTACGTGCCCTTCACCAATGCGATGGGTGTGGTACGCAGCCCCTTCTAGTACCCACAGTACTACCTGGCTGAGCCTTG	1	1e-05	0
GAATGGCACAGAAGGCCCTAACTTCTACGTGCCCTTCTCCAATGCGATGGGTGTGGTACGCAGCCCCTTCGAGTACCCACAGTACTACCTGGCTGAGCCATG	1	1e-05	30GGTC38GGCCTCAG47GAGCGAGCGAGCGCGCAGAGAGGGAG74GGCCAA85TCACT91GGGGTTCC100GCGGC
GAATGGCACAGAAGGCCCTAACTTCTACGTGCCCTTCTCCAATGCGATGGGTGTGGTACGCAGCCCCTTCGAGTGCCCACAGTACTACCTGGCTGAGCCATG	1	1e-05	44C
GAATGGCACAGAAGGCCCTAACTTCTACGTGCCCTTCTCCAATGCGATGGGCGTGGTACGCAGCCCCTTCGAGTACCCGCAGTACTACCTGGCTGAGCCATG	1	1e-05	0
GAATGGCACAGAAGGCCCTAACTTCTACGTGCCCTTCTCCAATGCGATGGGTGTGGTACGTAGCCCCTTCGAGTACCCACAGTACTACCTGGCTGAGCCATG	1	1e-05	43G
GAACGGCATAG-AGGCCC-AA-TT-TATGTGCCCTTCTCCAA--CGA--GGCGTGGT--GCAGCCCCTTCGAG--CCCGCAGTACTACCTGGC-GA-CCATG	1	1e-05	14GC22TT44TCAC59GG74AG94GA
GAATGGCACAGAAGGCCCTAACTTCTACGTGCCCTTCTCCAAT--GATGGGTGTGGCACGCAGCCCCTTCGAGTACCCACAGTACTTCCTGGTTGATCCATG	1	1e-05	0
GAATGGCACAGAAGGCCCTAACTTCTACGTGACCTTCTCCAAT--GATGGGTGTGGTACGCAGCCCCTTCGAGTACCCACAGTACTACCTGGCTGAGCCATG	1	1e-05	0
GAATGGCACAGAAGGCCCTAACTTCTACGTGCCCTTCTCCAATGCGACGGGTGTGGTACGCAGCCCCTTCGAGTAACCACAGTACTACCTGGCTGAGCCATG	1	1e-05	0
GAATGGCACAGAAGGCCCTAACTTCTAC----------------CGATGGGTGTGGTACGCAGCCCCTTCGAGTACCCACAGTACTACCTGGCTGAACCATG	1	1e-05	0
GAATGACACAGAAGGCCCTAACTTCTACGTGCCCTTCTCCAAT------GGTGTGGTACGCAGCCCCTTCGAGTACCCACAGTACTACCTGGCTGAGCCATG	1	1e-05	0
GAACGGCACAG-AGGCCC-AA-TT-TATGTGCCCTTCTCCAA--CGA--GGCGTGGT--GCAGCCCCTTCGAG--CCCGCATTACTACCTGGC-GA-CCATG	1	1e-05	14GC22TT44TCAC59GG74AG94GA
GAATGGCACAGAAGGCCCTAACTTCTACGTGCCCTTCTCCAATGCGATGGGTGTGGTACGCAGCCCCTTCGAGTACCCACAGTACTACCTGGCTGAGCCATG	1	1e-05	19A
GAACGGCACAG-AGGCCC-AA-TT-TATGTGCCCTTCTCCAA-GC-A--GGCGTGGT--GCAGCCCCTTCGAG--CCCGCAGTACTACCTGGC-GA-CCATG	1	1e-05	14GC22TT43GTCA59GG74AG94GA
GAACGGTACAG-AGGCCC-AA-TT-TATGTGCCCTTCTCCAA--CGA--GGCGTGGT--GCAGCCCCTTCGAG--CCCGCAGTACTACCTGGC-GA-CCATG	1	1e-05	14GC22TT44TCAC59GG74AG94GA
GAATGGCACAGAAGGCCCTAACTTCTACGTGCCCTTCTCCAAT-CGATGGTTGTGGTACGCAGCCCCTTCGAGTACCCACAGTACTACCTGGCTGAGCCATG	1	1e-05	0
GAATGGCACAGAAGGCCCTAACTTCTACGTGCCCTTCTCCAATGCGATGGGTGTGGTACGCAGCCCCTTCGAGTACCCACAGTACCACCTGGCTGAGTCATG	1	1e-05	0
GAATGGCACAGAAGGCCCTAACTTCTACGTGCCCTTCTCCAATGCGATGGGGGTGGAACGCAGCCCCTTCGAGTACCCACAGTACTACCTGGCTGGGCCATG	1	1e-05	0
GAATGGCACAGAAGGCCCTAACTTCTACGTGCCCTTCTCCAATGCGATGGGTGAGGCACGCAGCCCCTTCGAGTACCCACAGTACTACCTGGCTGAGCCATG	1	1e-05	0
GAATGGCACAGAAGGCCCTAACTTCTACGTGTCCTTCTCCAATG-GATGGGTGTGGTACGCAGCCCCTTCGAGTACCCACAGTACTACCTGGCTGAGCCATG	1	1e-05	0
GAATGGCACAGAAGGCCCTAACTTCTACGTGCCCTTCTCCAATGCGATGGGTGTGGTACGCAGCCCCTTCGAGTACCCACTGTACTACCTGGCTGAGCCATG	1	1e-05	43G
GAATGGCACAGAAGGCCCTAACTTCTACGTGCCCTTCTCCAATGCGATGGG--TGGTACGCAGCCCCTTCGAGTACCCACAGTACTACCTGGCTGAGCCATG	1	1e-05	50AA
GAATGGCACAGAAGGCCCTAACTTCTACGTGCCCTTCTCCAAT-CGATGGGTGTGGTACGCAGCCCCTTCGGGTACCCACAGTACTACCTGGCTGAGCCATG	1	1e-05	0
GAATGGCACAGAAGGCCCTAACTTCTACGTGCCCTTCTCCAATGCGA-GGGTGTGG-AC-CA-CCCCTTCGCGT-CCCACAG-ACAACCTGGCTGAGCCATG	1	1e-05	46GCCGC54AACCCCTA65A70GTTGG79T84CTC88G93CTCGC100G
GAATGGCACAGAAGGCCCTAACTTCTAAGTGCCCTTCTCCCATGCGATGGGTGTGGTACGCAGCCCCTTCGAGTACCCACAGTACTACCTGGCTGAGCCATG	1	1e-05	0
GAATGGCACAGAAGGCCCCAACTTCTACGTGCCCTTCTCCAGTGCGACGGGTGTGGTACGCAGCCCCTTCGAGTACCCACAGTACTACCTGGCTGAGCCATG	1	1e-05	0
GAATGGCACAGAAGGCCCTAACTTCTACGTGCCCTTCTCCAATGCGATGGGTGTGGTACGCAGCCCCTTCGAGTACCCACAGTACTACCTGGCTGAGCCATG	1	1e-05	44CTTTGGTCGCCCGGCCTCAGTGAGCGAGCGAGCGCGC
GAATGGCACAGAAGGCCCTAACTTCTACGTGCCCTTCTCCAATGCGATGGGTGTGGTACGCAGCCCCTTCGAGTACCCACAGTACTACCTGGCTGATCCATG	1	1e-05	44C
GAATGGCACAGAAGGCCCTAACTTCTACGTGCCCTTCTCCAATGCGATGGGTGTGGTACGCAGCCCCTTCGAGTACCCACAGTACTACCTGGCTGAGCCATG	1	1e-05	44TTGGCCACTCCCTCTCTGCGCGCTCGCTCGCTCA79T82GGCCGCCCGGGC
GAATGGCACAGAAGGCCCTAACTTCTACGTGCCCTTCTCCAATGCGATGGGTGCGGTACGCAGCCCCTTCAAGTACCCACAGTACTACCTGGCTGAGCCATG	1	1e-05	0
GAATGGCACAGAAGGCCCTAACTTCTACGTGCCCTTCTCCAA--CGATGGGTGTGGTACGCAGCCCTTTCGAGTACCCACAGTACTACCTGGCTGAGCCATG	1	1e-05	0
GAATGGCACAGAAGGCCCTAACTTCTACGTGCCCTTCTCCAA--CGATGGGTGTGGTACGCAGCCCCTTCGAGTACACACAGTACTACCTGGCTGAGCCATG	1	1e-05	0
GAATGGCACAGAAGGCCCTAACTTCTACGTGCCCTTCTCCAATG-GATGGGTGTGGTACGCAGCCCCTTCGAGTACCCACAGTACTACCTGGCTGAGCCATG	1	1e-05	62C
GAATGGCACAGAAGGCCCTAACTTCTACGTGCCCTTCTCCAATGCGATGGGTGTGGTACGCAGCCCCTTCGAGTACCCACAGTACTACCTGGCTGAGCCATG	1	1e-05	43GTTGGCCACTCCCTCTCTGCGCGCTCGCTCGCTCACTGAGGCCGG91ACC
GAATGGCACAGAAGGCCCTAACTTCTACGTGCCCTTCTCCAA-GCGATGGGTGTGGAACGCAGCCCCTTCGAGTACCCACAGTACTACCTGGCTGAGCCATG	1	1e-05	0
GAATGGCACAGAAGGCCCTAACTTCTACGTGCCCTTCTCCAATGCGATGGGTGTGGTACGCAGCCCCTTCGAGTACCCACAGTACTACCTGGCTGAGCCAT-	1	1e-05	100C
GAATGGCACAGAAGGCCCTAACTTCTACGTGCCCTTCTCCAATG--------GTAGTACGCAGCCCCTTCGAGTACCCACAGTACTACCTGGCTGAGCCATG	1	1e-05	0
GAATGGCACAGAAGGCCCTAACTTCTACGTGCCCTTCTCCAATGCGATGGGTGTGGTACGCAGCCCCTTCGAGTACCCACAGTACTACCTGGCTGAGCCATG	1	1e-05	44GTCGGGCGGCCTCAGTGAGCGAGCGAGCGCGCAGAGAGGGAGTGGCCAA
GAACGGCACAG-AGGCCC-AA-TT-TATGTGCCCTTCTCCAA--CGA-GGGTG-GG---GCAGCCCCTTCGAG--CCCGCAGTACTACCTGGC-GA-CCATG	1	1e-05	14GC22TT44TCAC51C59GG74AG94GA
GAATGGCACAGAAG-----------------------------GCGATGGGTGTGGTACGCAGCCCCTTCGAGTACCCACAGTACTACCTGGCTGAGCCATG	1	1e-05	0
GAATGGCACAGAAGGCCCTAACTCCTACGTGCCCTTCTCCAATGCGATGGGTGTGGTACGCAGCCCCTTCGGGTACCCACAGTACTACCTGGCTGAGCCATG	1	1e-05	0
GAATGTCACAGAAGGCCCTAACTTCTACGTGCCCTTCTCCACTGCGATGGGTGTGGTACGCAGCCCCTTCGAGTACCCACAGTACTACCTGGCTGAGCCATG	1	1e-05	0
GAATGGCACAGAAGGCCCTAACTTCTACGTGCCCTTCTCCAATGCGATGGGTGTGGTACGCAGCCCCTTCGAGTACCCACAGTACTACCTGGCTGAGCCATG	1	1e-05	44TCTCTGCGCGCTCGCTCGCTCACTGAGGCCGCC
AAATGGCACAGAAGGCCCTAACTTCTACGTGCCCTTCTCCAA--CGA--GGCGTGGT--GCAGCCCCTTCGAG--CCCGCAGTACTACCTGGC-GA-CCATG	1	1e-05	44TCAC59GG74AG94GA
GAATGGCACAGAAGGCCCTAACTTCTACGTGCCCTTCTCCAA--CGATGGGTGTGGTACGCAGCCCCTTCGAGTACCCACAGTACTACCTGGCTGAGCCATG	1	1e-05	44C
GAATGGCACAGAAGGCCCTAACTTCTACGTGCCCTTCTCCAATGCG-TGGGTGTGGTACGCAGCCCCTTCGAGTACCCACAGTACTACCTGGCTGAGCCATG	1	1e-05	44GGCCGCC
GAATGGCACAGAAGGCCCTAACTTCTACGTCCCCTTCTCCAAT-CGATGGGTGTGGTACGCAGCCCCTTCGAGTACCCACAGTACTACCTGGCTGAGCCATG	1	1e-05	0
GAATGGCACAGAAGGCCCTAACTTCTAC-TGCCC-TCT--AATCCGATGGGTGTGGTACGCAGCCCCTTCGAGTACCCACAGTACTACCTGGCTGAGCCATG	1	1e-05	18GGCGGCCTCAGTGAGCGAGCGAGCGCGCAGAGAGGGAG57GGCC65CCA69CA74GGGGTTC85GG93G95C
GAATGGCACAGAAGGCCCTAACTTCTACGTGACCTTCTCCAATGCGATGGGTGTGGTACGCAGCCCCTTCGAGTATCCACAGTACTACCTGGCTGAGCCATG	1	1e-05	0
GAATGGCACAGAAGGCCCTAACTTCTACGTGCCCTTCTCCAAT--GATGGGTGTGGTACGCAGCCCCTCCGAGTACCCACAGTACTACCTGGCTGAGCCATG	1	1e-05	0
GAATGGCACAGAAGGCCCTAACTTCTGCGTGCCCTTCTCCAATGCGCTGGGTGTGGTACGCAGCCCCTTCGAGTACCCACAGTACTACCTGGCTGAGCCATG	1	1e-05	0
GAATGGCACAGAAGGCCCTAACTTCTACGTGCCCTTCTCCAA--CGATGGGTGTGGTACGCAGCCCCTTCGAGTACCCACAGTACTACCTGGCTGAGCTATG	1	1e-05	0
GAATGGCACAGAAGGCCCTAACTTCTACGTGCCCTTCTCCAATG-------------A---AGCCCCTTCGAGTACCCACAGTACTACCTGGCTGAGCCATG	1	1e-05	0
GAACGGCACAG-AGGCCC-AA-TT-TATGTGCCCTTCTCCAA--CGA--GGAGTGGT--GCAGCCCCTTCGAG--CCCGCAGTACTACCTGG-TG-GCCATG	1	1e-05	14GC22TT44TCAC59GG74AG95AC
GAATGGCACAGAAGGCCCTAACTTCTACGTGCCCTTCTCCAATGCGATGGGTGTGGTACGCAGCCCCTTCGAGTACCCACAGTACTACCTGGCTGAGCCATG	1	1e-05	44CGACCTTTGGTCGCCCGGCCTCAGTGAGCGAGCGAGCGCGCAGAGAGGGAGTGGCC
GAATGGCACAGAAGGCCCTAACTTCTACGTGCCCTTCTCCAATGCGACGGGTGTGGTACG-AGCCCCTTCGAGTACCCACAGTACTACCTGGCTGAGCCATG	1	1e-05	61G
GAATGGCACAGAAGGCCCTAACTTCTACGTGCCCTTCTCCAATG-GATGGGTGTGGTACGCAGCCCCTTCGAGTACCCACAGTACTACCTGGCTGAGCCATG	1	1e-05	40A
GAATGGCACAGAAGGCCCTAACTTCTACGTGCCCTTCTCCAATGCGATGGGTGTGGTACGCAGCCCCTTCGAGTACCCACAGTACTACCTGGCTGAGCCGTG	1	1e-05	44GGCGGCCTCAGTGAGCGAGCGAGCGCGCAGAGAGGGAGTGGCAAC
GAATGGCACAGAAGGCCCTAACTT--------------------CGATGGGTGTGGTACGCAGCCCCTTCGAGTACCCACAGTACTACCTGGCTGAGCCATG	1	1e-05	0
GAATGGCACAGAAGGCCCTAACTTCTACGTGCCCTTCTCCAATGCGATGGGTGTGGTACGCAGCCCCTTCGAGTACCCACAGTACTACCTGGCTGAGCCATG	1	1e-05	44GCCACTCCCTCTCTGCGCGCTCGCTCGCTCACTGAGGCCGGGCGACCAAAGGTCGCCCGACGCC
GAACGGCACAG-AGGCCC-AA-TT-TATGTGCTCTTCTCCAA--CGA--GGCGTGGT--GCAGCCCCTTCGAG--CCCGCAGTACTACCTGGC-GA-CCATG	1	1e-05	14GC22TT44TCAC59GG74AG94GA
GAATGGCACAGAAGGCCCTAACTTCTACGTGCCCTTCTCCAATGCGATGGGTGTGGTACGCAGCCCCTTCGAGTACCCACAGTACTACCTGGCTGAGCCATG	1	1e-05	38CGTCGCCCGGCCTCAGTGAGCGAGCGAGCGCGCAGAGAGGGAGTGG88CTCCATCACTAGGGGTTCC
GAATGGCACAGAAGGCCCTAACTTCTACGTGCCCTTCTCCAATGCGATGGGTGTGGTACGCAGCCCCTTCGAGTACCCACAGTACTACCTGGCTGAGCCATG	1	1e-05	40TGCCCGGGCGGCCTCAGTGAGCGAGCGAGCGCGCAGAG79GGG83G86GCCAA
GAATGTCACAGAAGGCCCTAACTTCTACGTGCCCTTCTCCAATGCGATGGGTGTGGCACGCAGCCCCTTCGAGTACCCACAGTACTACCTGGCTGAGCCATG	1	1e-05	0
GAATGGCACAGAAGGCC--------------------------G-GATGGGTGTGGTACGCAGCCCCTTCGAGTACCCACAGTACTACCTGGCTGAGCCATG	1	1e-05	0
GAATGGCACAGAAGGCCCTAACTTCTACGTGCCCTTCTCCAATGCGATGGGTGTGGTACGCAGCCCCTTCGAGTACCCACAGTACTACCTGGCTGAGCCATG	1	1e-05	42GTTGGCCACTCCCTCTCTGCGCGCTCGCTCGCTCACTGAGGCCGGGCGGCCTCAGTGAGCGAGCGAGCGCGCAGAGAGGGAG
GAGTGGCACAGAAGGCCCTAACTTCTACGTGCCCTTCTCCAA---------TGTGGTACGCAGCCCCTTCGAGTACCCACAGTACTACCTGGCTGAGCCATG	1	1e-05	0
GAATGGCACAGAAGGCCCTAACTTCTACGTGCCCTTCTCCAATGCGATGGGTGTGGTACGCACCCCCTTCGAGTACCCACAGTACTACCTGGCTGGGCCATG	1	1e-05	0
GAATGGCACAGAAGGCCCTAACTTCTACGTGCCCTTCTCCAATGCGATGGGTGTGGTACGCAGCCCCTTCGAGTACCCACAGTACTATCTGGCTGAGCCATG	1	1e-05	43G
GAATGACACAGAAGGCCCAAAC-TCTAAG-GCCCTT-TCC-ATGCGATGGGTGTGGTACGCAGCCCCTTCGAGTACCCACAGTACTACCTGGCTGAGCCATG	1	1e-05	29GC35C
GAATGGCACAGAAGGCCCT-ACCTCTACGGGCCCTTCTCCAATGCGATGGGTGTGGTACGCAGCCCCTTCGAGTACCCACAGTACTACCTGGCTGAGCCATG	1	1e-05	0
GAATGGCACAGAAGGTCCTAACTCCTACGCGCCCTTCTCCAA-GCGATGGGTGTGGTACGCAGCCCCTTCGAGTACCCACAGTACTACCTGGCTGAGCCATG	1	1e-05	0
GAATGGCACAGAGGGCCCTAACTTCTACGTGCCCTTATCCAATGGGATGGGTGTGGTACGCAGCCCCTTCGAGTACCCACAGTACTACCTGCCTGAGCCATG	1	1e-05	0
GAATGGCACACAAGGCCCTAACTTCTACGTGCCATTCTCCAATGCAATGGGTGTGGTACGCAGCCCCTTCGAGTACCCACAGTACTACCTGGCTGAGCCATG	1	1e-05	0
GAATGGCACAGAAGGCCCTAACTTCTACGTGCCCTTCTCCAATGCGATGGGCGTGGTACGCAGCCCCCTCGAGTACCCACAGTACTACCTGGCTGAGCCATG	1	1e-05	0
GAATGGCACAGAAGGCCCTAACTTCTACGTGCCCTTCTCCAATGCGATGGGTGTGGTACGCAGCCCCTTCGAGTACCCACAGTACTACCTGGCTGAGCCATG	1	1e-05	44GCGACCTTTGGTCGCCCGGCCTCAGTGAGCGAGCGAGCGCGCAGAGAGGGAGTGGCCAA
GAATGGAACAGTAGGCCCTAAC-TCTAAGAGCCCTAC-CCAATGCGATGGGTGTGGTACGCAACCCCTTCGAGTACCCACAGAACTACCTGGCTGAGACATG	1	1e-05	19A34A
GAACGGCACAG-AGGCCC-AA-TT-TACGTGCCCTTCTCCAA--CGA--GGCGTGGT--GCAGCCCCTTCGAGCACCCGCAGTACTACCTGGC-GA-CCATG	1	1e-05	14GC22TT44TCAC59GG94GA
GAATGGCACAGAAGGCCCTAACTTCTACGTGCCCTTCTCCAATGCGATGGGTGTGGTACGCAGCCCCTTCGAGTACCCACAGTACTACCTGGCTGAGCCATG	1	1e-05	42TGAACAGCAGCTTCTTCACTCTC
GAATGGCACAGGAGGCCCGAACTTCTACGTGCCCTTCTCCAATGCGATGGGTGTGGTACGCAGCCCCTTCGAGTACCCACAGTACTACCTGGCTGAGCCATG	1	1e-05	0
GAACGGCACAG-AGGCCC-AA-TT-TATGTGCCCTTCTCCAA--CGA--GGAGTGGT--GCAGCCCCTTCGAG--CCCGCAGTACTACCTGGC-GA-CCATG	1	1e-05	14GC22TT44TCAC59GG74AG94GA
GAATGGCACAGGAGGCCCTAACTTCTACGTGCCCTTCTCCAATGCGATGGTTGTGGTACGCAGCCCCTTCGAGTACCCACAGTACTACCTGGCTGAGCCATG	1	1e-05	0
GAATGGCACAGAAGGCCCTAACTTCTACGTGCCCTTCTCCAATGCGATGGGTGTGGTACGCAGCCCCTTCGAGTACCCACAGTACTACCTGGCTGAGCCATG	1	1e-05	42TGTCGCCCGACGCCCGGGCTTTGCCCGGGCGGCCTCAGTGAGCGAGCGAGCGCGCAGAGAGGGAGTGGCCAACTCCATCACTAGGTGTTCC
GAATGGTACAGAAGGCCCTAACTTCTACGTGCCCTTCTCCAA--CGATGGGTGTGGTACGCAGCCCCTTCGAGTACCCACAGTACTACCTGGCTGAGCCATG	1	1e-05	0
GAATGGCACAGAAGGCCATAACTTCTACGTGCCCTTCTCCAATGCGATGGGTGTGGTACGCAGCCCCTTCGAGTACCCACAGTACTACCTGGCTGAGCCATG	1	1e-05	44CTTTGGTCGCCCGGCCTCAGTGAGCGAGCGAGCGCGC
GAATGGCACAGAAGGCCCTAACTTCTACGTGCCCTTCTCCAATG-GATGGGTGTGGTACGCAGCCCCTTCGATTACCCACAGTACTACCTGGCTGAGCCATG	1	1e-05	0
GAATGGCACAGAAGGCCCTAACTTCTACGTGCCCTTCTCCAATGCGATGGGTGTGGTACGCAGCCCCTTCGAGTACCCACAGTACTACCTGGCTGAGCCATG	1	1e-05	43GGCGCTCGCTCGCTCACTGAGGCCGCCCGGGCAAAGCCCGGGCGTCGG93GA
GAATGGCACAGAAGGCCCTAACTTCTACGTGCCCTTCTCCAATGCGATGGGTGTGGTACGCAGCCCCTTCGAGTACCCACAGTACTACCTGGCTGAGCCATG	1	1e-05	44CTCCCTCTCTGCGCGCTCGCTCGCTCACTGAGGCCGGGCGACCAAAGGTCGCCCGACGCCCGGGCTTTGC
GAATGGCACAGAAGGCCCTAACTTCTACGTGCCCTTCTCCAATGCGATGGGTGTGGTACGCAGCCCCTTCGAGTACCCACAGTACTACCTGGCTGAGCCATG	1	1e-05	44CCACTCCCTCTCTGCGCGCTCGCTCGCTCACTGAGGCCGGGCGACCAA
GAATGGCACAGAAGGCCCTAACTTCTATGTGCCCTTCTCCAATGCGATGGGTGTGGTACGCAGCCCCTTCGAGTACCCACAGTACTACCTGGCTGAGCCATG	1	1e-05	44T
GAATGGCACAGAAGGCCCTAACTTCTACGTGCCCTTCTCCAATGCGATGGGTGTGATACGCAGCCCCTTCGAGTACCCACAGTACTACCTGGTTGAGCCATG	1	1e-05	0
GAATGGCACAGAAGGCCCTAACTTCTACGTGCCCTTCTCCAAT-CGATGGGTGTGGAACGCAGCCCCTTCGAGTACCCACAGTACTACCTGGCTGAGCCATG	1	1e-05	0
GAATGGCACAGAAGGCCCTAACTTCTACGTGCCCTTCTCCAATGAGATGGGTGTGGTACGCAGCCCCTTCGAGTATCCACAGTACTACCTGGCTGAGCCATG	1	1e-05	0
GAATGGCACAGAAGGCCCTCACTTCTACGTGCCCTTCTCCAATGCGCTGGGTGTGGTACGCAGCCCCTTCGAGTACCCACAGTACTACCTGGCTGAGCCATG	1	1e-05	0
#NAME?	1	1e-05	0
GAATGGCACAGAAGGCCCTAACTTCTACGGGCCTTTCTCAAAGGCGATGGGTGTGGTACGCAGCCCCTTCGAGTACCCACAGTACTACCTGGCTGAGCCATG	1	1e-05	0
GAATGGCACAGAAGGCCCTAACTTCTACGTGCCCTTCTCCAATGCGATGGGTGTGGTACGCAGCCCCTTCGAGTACCCACAGTACTACCTGGCTGAGCCATG	1	1e-05	43GAAGTTGGCGAGATTTTTGCGGCCGCAGGAACCCCTA
GAATGGCACAGAAGGCCCTAACTTCTACGTGCCCTTCTCCAATGCGACGGGTGTGGTACGCAGCCCCTTCGAGTACCCACAGTACTACCTGGATGAGCCATG	1	1e-05	0
GAATGGCACAGAAGGCCCTAACTTCTACGTGCCCTTCTCCAATGCGATGGGTGTGGTACGCAGCCCCATCGAGTACCCACAGTACTACCTGGCTGAGCCATG	1	1e-05	44TTGGCCACTCCCTCTCTGCGCGCTCGCTCGCTCACTGAGGCCGGGCGACCAAAGGTCGCC
GAATGGCACAGAAGGCCCTAACTTCTATGTGCCCTTCTCCAATGCGATGGGCGTGGCACGCAGCCCCTTCGAGTACCCACAGTACTACCTGGCTGAGCCATG	1	1e-05	0
GAATGGCACAGAAGGCCCTAACTTCTACGTGCCCTTCTCCAA--CGA--GGCGTGG--CGCAGCCCCTTCGAG--CCCGCAGTACTACCTGGC-GA-CCATG	1	1e-05	44TCAC59GG74AG94GA
GAATGGCACAGAAGGCCCTAACTTCTACGTGCCCTTCTCCAA--CGACGGGTGTGGTACGCAGCCCCTTCGAGTACCCACAGTACTACCTGGCTGAGCCATG	1	1e-05	0
GAATGGCACAGAAGGCCCTCACTTCTACGTGCCCTTCTCCAATGCGATGGGTGTGGTACGCAGCCCCTTCGAGTACCCACAGTACTACCTGGCTGGGCCATG	1	1e-05	44CGCCCGGCCTCAGTGAGCGAGCGAGCGCGCAGAGAGGGCGTGGCCAAC
GAATGGCACAGAAGGCCCTAACTTCTACGTGCCCTTCTCCAAT--GATGGGTGTAGTACGCAGCCCCTTCGAGTACCCACAGTACTACCTGGCTGAGCCATG	1	1e-05	0
GAATGGCACAGAAGGCCCTAACTTCTACGTGCCCTTTTCCAA--CGATGGGTGTGGTACGCAGCCCCTTCGAGTACCCACAGTACTACCTGGCTGAGCCATG	1	1e-05	0
GAATGGCACAGAAGGCCCTAACTTCTACGTGCCCTTCTCCAAT--GATGGGTGTGGTACGAAGCCCCTTCGAGTACCCACAGTACTACCTGGCTGAGCCATG	1	1e-05	0
GAATGGCACAGAAGGCCCTGACTTCTACGTGCCCTTCTCCAATGCGATGGGTGTGATACGCAGCCCCTTCGAGTACCCACAGTACTACCTGGCTGAGCCATG	1	1e-05	0
GAGTGGCACAGAAGGCCCTAACTTCTACGTGCCCTTCTCCAATGCGATGGGGGTGGTACGCAGCCCCTTCGAGTACCCACAGTACTACCTGGCTGAGCCATG	1	1e-05	0
GAATGGCACAGAAGGCCCTAACTTCTACGTGCCCTTCTCCAATGCGATGGGTGCGGTACGCAGCCCCTTCGAGTACCCAGAGTACTACCTGGCTGAGCCATG	1	1e-05	0
GAATGGCACAGAAGGCCCTAACTTCTACGTGCCCTTCTCC----CGATGGGTGTGGTACGCAGCCCCTTCGAGTACCCACAGTACTACCTGGCTGAGCCATG	1	1e-05	38CC
GAATGGCACAGAAGGCCCTAACTTCTACGTGCCCTTCTCCAATGCGATGGG--TGGTACGCAGCCCCTTCGAGTACCCACAGTACTACCTGGCTGAACCATG	1	1e-05	48A51C
GAATGGCATAGAAGGCCCTAACTTCTACGTGCCCTTCTCCAATGCGATGGGTGTGGTACGCAGCCCCTTCGGGTACCCACAGTACTACCTGGCTGAGCCATG	1	1e-05	0
GAATGGCACAGAAGGCCCTAACTTCTACGTGCCCTTCTCCAATGCGATGGGTGTGGTACGCAGCCCCTTCGAGTACCCACAGTACTACCTGGCTGAGCCATG	1	1e-05	44CTAAAACAAGGCAAAATGCCGTGTTTATCTCGTCAACTTGTTGGCGAGATTTTTGCGGCCGCAAC
GAATGGCACAGAAGGCCCTAACTTCTACGTGCCCTTCTCCAATGC---GGGTGTGGTACGCAGCCCCTTCGAGTACCCACAGTACTTCCTGGCTGAGCCATG	1	1e-05	0
GAATGGCACAGAAGGCCCTAACTTCTACGTGCACTTCTCCATTGCGATGGGTGTGGTCCGCAGCCCCTTCGAGTACCCACAGTACTACCTGGCTGAGCCATG	1	1e-05	0
GAATGGCACAGAAGGCCCTAACTTCTACGTGCCCTTCTCCAATGCGACGGGTGTGTTACGCAGCCCCTTAGAGTACCCACAGTACTACCTGGCTGAGCCATG	1	1e-05	0
GAATGGCACAGAAGGCCCTAACTTCTACGTGCCCTTCTCCAATGCGATGGGTGTGGTACGCAGCCCCTTTGAGTACCCACAGTACTACCTGGCTGATCCATG	1	1e-05	0
GAATGGCACAGAAGGCACTAACTTCTACGTGACCTTCTCCAATGCGATGGGTGTGGTACGCAGCCCCTTCGAGTACCCACAGTACTACCTGGCTGAGCCATG	1	1e-05	0
GAATGGCACAGAAGGCCCTAACTTCTACGTGCCCTTCTCCAATGCGATGGGTGTGGTACGCAGCCCCTTCGAGTACCCACAGTACTACCTGGCTGAGCCATG	1	1e-05	55TGGGT62GGC
GAATGGCACATAAGGCCCTAACTTCTACGTCCCCTTCTCCAATGCGATGGGTGTGGTACGCAGCCCCTTCGAGTACCCACAGTACTACCTGGCTGAGCCATG	1	1e-05	0
GAATGGCACAGAAGGCCCTAACTTCTACGTGCCCTTCTCCAATGCGATGGGTGTGGTACGCAGCCCCTTCGAGTACCCACAGTACTACCTGGCTGAGCCATG	1	1e-05	43GACTCCCTCTCTGCGCGCTCGCTCGCTCACTGAGGCCGCCCGGGCAAAGCCCGGGCGTCGG
GAATGGCACAGAAGGCCCTAACTTCTACGTGCCCTTGTCCAATG-GATGGGTGTGGTACGCAGCCCCTTCGAGTACCCACAGTACTACCTGGCTGAGCCATG	1	1e-05	0
GAATGGCACAGAAGGCCCTAACTTCTACGTGCCCTTCTCCAATGCGATGGGTGTGGTACGCAGCCCCTTCGAGTACTCACAGTACTACCTGGCTGAGCCATG	1	1e-05	44C
GAATGACACAGAAGGCCCTAACTTCTACGTGCCCTTCTCCAATGCGATGGGTGTGGTACGCAGCCCCTTCGAGTACCCACAGTACTACCTGGCTGAGCCATG	1	1e-05	43G64C
GAATGGCACAGAAGGCCCTAACTTCTACGTGCCCTTCTCCAAT--GATGGGTGTGGTACGCAGCACCTTCGAGTACCCACAGTACTACCTGGCTGAGCCATG	1	1e-05	0
GAATGGCACAGAAGGCCCTAACTTCTACGTGCCCTTCTCCAAT---ATGGGTGTGGTACGCAGCCCCTTCGAGTACCCACAGTACTACCTGGCTGAGCCATG	1	1e-05	44A
GAATGGCACAGAAGGCCCTAACTTCTACGTGCCCTTCTCCAA-----------TGG--CGCAGCCCCTTCGAGTACCCACAGTACTACCTGGCTGAGCCATG	1	1e-05	0
GAATGGCACAGAAGGCCCTAACTTCTACGTGCCCTTCTCCAAT--GATGGGTGTGGTACGCATCCCCTTCGAGTACCCACAGTACTACCTGGCTGAGCCATG	1	1e-05	0
GAATGGCACAGAAGGCCCTAACTTCTACGTGCCCTTCTCCAATGCGATGGGTGTGGTACGCAGCCCCTTCGAGTACCCACAGTACTACCTGGCTGAGCCATG	1	1e-05	42AGGTCGCCCGGCCTCAGTGAGCGAGCGAGCGCGCAGAGAGGGAG88GCCAAC
GAATGGCACAGAAGGCCCTAACTTCTACGTGCCCTTCTCCAATGCGATGGGTGTGGTACGCAGCCCCTTCGTGTACCCACAGTACTACCTGGCTGGGCCATG	1	1e-05	0
GACTGGCACAGAAGGCCCTAACTTCTACGTGCCCTTCTCCAATGCGATGGGCGTGGTACGCAGCCCCTTCGAGTACCCACAGTACTACCTGGCTGAGCCATG	1	1e-05	0
GAATGGCACAGAAGGCCCTAACTTCTACGTGCCCTTCTCCAATGCGATGGGTGTGGTACGCAGCCCCTTCGAGTACCCACAGTACTACCTGGCTGAGCCATG	1	1e-05	44TGGCCACTCCCTCTCTGCGCGCTCGCTCGCTCACTGAGGCCGCCCGGGCAAAGCCCGGGCGTCGGGCGACCAAA
GAATGGCACAGAAGGCCCTAACTTCTACGTGCCCTTCTCCAAT--GATGGGTGTGGTAAGCAGCCCCTTCGAGTACCCACAGTACTACCTGGCTGAGCCATG	1	1e-05	0
GAATGGCACAGAAGGCCCTAACTTCTACGTGCCCTTCTCCAATGCGATGGGTGTGGTACGCAGCCCCTTCGAGTACCCACAGTACTAACTGGCTGAGCCATG	1	1e-05	43G
GAATGGCACAGAAGGCCCTAACTTCTACGTGCCCTTCTCCA--GCGATGGGTGTGGTACGCAGCCCCTTCGAGTACCCACAGTACTACCTGGCTGAGCCATG	1	1e-05	42T
GAATTGCACAGAAGGCCCTAACTTCTACGTGCCCTTCTCCAATGCGATGGGTGTGGTACGCAGCCCCTTCGAGTACCCACATTACTACCTGGCTGAGCCATG	1	1e-05	0
GAATGGCACAGAAGGCCCTAACTTCTACGTGCCCTTCTCCCATGCGATGGGTGTGGTACGCAGCCCCTTCGAGTACCCACAGTACTACCTGGTTGAGCCATG	1	1e-05	0
GAATGGCACAGAAGGCCCTAACTTCTACGTGCCCTTCTCCAATG--------GTGGTACGCAGTCCCTTCGAGTACCCACAGTACTACCTGGCTGAGCCATG	1	1e-05	0
GAATGGCACAGAAGGCCCTAACTTCTACGTGCCCTTCTCCAATGCGATGGGTGTGGTACGCAGCCCCTTCGAGTACCCACAGTACTACCTGACTGTGCCATG	1	1e-05	0
GAATGGCACAGAAGGCCCTAACTTCTACGTGCCCTTCTCCAATGCGATGGGTGTGGTACGCAGCCCCTTCGAGTACCCACAGTACTACCTGGCTGAGCCATG	1	1e-05	44AAAGGTCGCCCGACGCCCGGGCTTTGCCCGGGCGGCCTCAGTGAGCGAGCGAGCGCGCAGAGAGGGAGTGGCCA
GAATGGCACAGAAGGCCCTAACTTCTACGTGCCCTTCTCCAATGCGATGGGTGTGGTACGCAGCCCCTTCGAGTACCCACAGTACTACCTGGCTGAGCCATG	1	1e-05	44TTGGCCACTCCCTCTCTGCGCGCTCGCTCGCTCACTGAGGCCGCCC
GAATGGCACAGAAGGCCCTAACTTCTACGTGCCCTTCTC-----CGATGGGTGTGGTACGCAGCCCCTTCGAGTGCCCACAGTACTACCTGGCTGAGCCATG	1	1e-05	0
GAATGGCACAGAAGGCCCTAACTTCTACGTGCCCTTCTCCAAT-----------------------------GT----ACAGTACTACCTGGCTGAGCCATG	1	1e-05	0
GACTGGCACAGAAGGCCCTAACTTCTACGCGCCCTTCTCCAATGCGACGGGTGTGGTACGCAGCCCCTTCGAGTACCCACAGTACTACCTGGCTGAGCCATG	1	1e-05	0
GAATGGCACAGAAGGCCCTAACTTCTACGTGCCCTTCTCCAATGCGATGGGTGTGGTACGCAGCCCCTTCGAGTACCCACTGTACTACCTGGCTGGGCCATG	1	1e-05	0
GAATGGTACAGAAGGCCCTAACTTCTACGTGCCCTTCTCCAATG----GGGTGTGGTACGCAGCCCCTTCGAGTACCCACAGTACTACCTGGCTGAGCCATG	1	1e-05	0
GAATGGCACAAAAGGCCCTAACTTCTACGTGCCCTTCTCCAATG-GATGGGTGTGGTACGCAGCCCCTTCGAGTACCCACAGTACTACCTGGCTGAGCCATG	1	1e-05	0
GAATGGCACAGAAGGCCCTAACTTCTACGTGCCCTTCTCCAAT-CGATGGGTGTGGTACGCAGCCCCTTCGAGTACCCACGGTACTACCTGGCTGAGCCATG	1	1e-05	0
GAATGGCACAGAAGGCCCTAACTTCTACGTGCCCTTCTCCAATGCGATGGGTGTGGTACGCAGCCCCTTCGAGTACCCACAGTACTGCCTGGCTGAGCCATG	1	1e-05	44A
GAATGGCACAGAAGGCCCTAACTTCTACGTGCCCTTCTCCAATG----------GG-------------------CCCACAGTACTACCTGGCTGAGCCATG	1	1e-05	0
GAATGGCACAGAAGGCCCTAACTTCTACGTGCCCTTCTCCAATGCGATGGGTGTGGTACGCAGCCCCTTCGAGTACCCACAGTACTACCTGGCTGAGCCATG	1	1e-05	48GGGTGTGAAGTA
GAATGGCACAGAAGGCCCTAACTTCTACGGGCCCTTCTCCAATGCGATGGGTGTGGTACGCATCCCCTTCGAGTACCCACAGTACTACCTGGCTGAGCCATG	1	1e-05	0
GAATGGCACAGAAGGCCCTAACTTCTACGTGCCCTTCTCCAATGCGATGGGTGTGGTACGCAGCCCCTTCGAGTACCCACAGTACTACCTGGCTGAGCCATG	1	1e-05	64CCCTTCG
GAATGGCACAGAAGGCCCTAACTTCTACGTGCCCTTCTCCAAT--GATGGGTGTGGTACGCAGCCCCTTCGAGTACCCATAGTACTACCTGGCTGAGCCATG	1	1e-05	0
GAACGGCACAGAAGGCCCTAACTTCTACGCGCCCTTCTCC--TGCGATGGGTGTGGTACGCAGCCCCTTCGAGTACCCACAGTACTACCTGGCTGAGCCATG	1	1e-05	38A40A
GATTGGCACAGAAGGCCCTAACTTCTACGTGCCCTTCTCCAATGCGATGGGTGTGGTACGCAGTCCCTTCGAGTACCCACAGTACTACCTGGCTGAGCCATG	1	1e-05	0
GAATGGCACAGAAGGCCCTAACTTCTACGTGCCCTTCTCCAATG-GATGGGTGTGGTACGCAGCCCCTTTGAGTACCCACAGTACTACCTGGCTGAGCCATG	1	1e-05	0
GAATGGCACAGAAGGCCCTAACTTCTACGTGCCCTTCTCCAATGCGATGGGTGTGGTACACAGCCCCTTCGAGTACCCACAGTACTACCTGGTTGAGCCATG	1	1e-05	0
GAATGGCACAGAAGGCCCTAACTTCTACGTGCCCTTCTCCAATGCGATGGGTGTGGTACGCAGCCCCTTCGAGTACCCACAGTACTACCTGGCTGAGCCATG	1	1e-05	44GCCCGGGCGGCCTCAGTGAGCGAGCGAGCGCGCAGAGAGGGAGTGGCCAATGGCCACTCCCTCTCTGCGCGCTCGCTCGCTCACTGAGGCCGGGCGAC
GAATGGCACAGAAGGCCCTAACTTCTACGTGCCCTTCTCCAACGCGCTGGGTGTGGTACGCAGCCCCTTCGAGTACCCACAGTACTACCTGGCTGAGCCATG	1	1e-05	0
GAATGGCACAGAAGGCCCTAACTTCTACGTGCCCTTCTCCAATGCGATGGGTGTGGTACGCAGCCCCTTCGAGTACCCACAGTACTACCTGGCTGAGCCATG	1	1e-05	49GAT
GAATGGCACAGAAGGCCCTAACTTCTACGTGCCCTTCTCCAATGCGATGGGTGTGGTACGCAGCCCCTTCGAGTACCCACAGTACTACCTGGCTG-GCCATG	1	1e-05	96T
GAACGGCACAG-AGGCCCCAA-TT-TATGTGCCCTTCTCCAA--CGA--GGCGTGGT--GCAGCCCCTTCGAG--CCCGCAGTACTACCTGGC-GA-CCATG	1	1e-05	13C22TT44TCAC59GG74AG94GA
GAAT--CACAG-AGGCCC-AA-TT-TATGTGCCCTTCTCCAA--CGA--GGCGTGGT--GCAGCCCCTTCGAG--CCCGCAGTACTACCTGGC-GA-CCATG	1	1e-05	3CG14GC22TT44TCAC59GG74AG94GA
GAATGGCACAGAAGGCCCCAACTTCTACGTGCCCTTCCCCAATGCGATGGGTGTGGTACGCAGCCCCTTCGAGTACCCACAGTACTACCTGGCTGAGCCATG	1	1e-05	0
GAATGGCACAGAAGGCCCTAACTTCTACGTGCCCTTCTCCAAT-CGATGGGTGTGGTACGCAGCCCCTTCGAGTACCCACAGTACTACTTGGCTGAGCCATG	1	1e-05	0
GAATGGCACAGAAGGCCCTAACTTCTACGTGCCCTTCTCCAATG-GATGGGTGTGGTACGCAGCCCCTTCGAGTACCCACAGTACTACCTGGC-GA-CCATG	1	1e-05	43GG95GA
GAATGGCACAGAAGGCCCTAACTTCTACGTGCCCTTCTCCAATGCGATGGGTGTGGTACGCAGCCCCTTCGAGTACCCACAGTACTACCTGGCTGAGCCATG	1	1e-05	36CCCCAATGCGGCCGGC55AGTGAGCGAGCGAGCGCG75GAGAGGG83G86GCCA
GAATGGCACAGAAGGCCCTAACTTCTACGTGCCCTTCTCCAATGCGACGGGTGTGGTACGCAGCCCCTTCGAGTACCCACAGTACTCCCTGGCTGAGCCATG	1	1e-05	0
GAATAGCACAGAAGGCCCTAACTTCTACGTGCCCTTCTCCAATG-GATGGGTGTGGTACGCAGCCCCTTCGAGTACCCACAGTACTACCTGGCTGAGCCATG	1	1e-05	0
GAATGGCACAGAAGGCCCTAAC----------------------CGATGGGTGTGGTACGCAGCCCCTTCGAGTACCCACAGTACTACCTGGCTGAGCCATG	1	1e-05	0
GAATGGCACAGAAGGACCTAACTTCTACGTGCCCTTCGCCAATGCGATGGGTGTGGTACGCAGCCCCGACGAGGACCCACAGTACTACCTGGCTGAGCCTTG	1	1e-05	0
GAATGGCACAGATGGCCCTAACTTCTACGTGCCCTTCTCCAATGCGATGGGTGTGGTACGCAGCCCCTTCGAGTACCCACAGTACTACCTGGCTGAGCCATG	1	1e-05	43G
GAATGGCACAGAAGGCCCTAACTTCTACGTGCCCTTCTCCAATGCGATGGGTGTGGTACGCAGCCCCTTCGAGTACCCACAGTACTACCTGGCTGAGCCAGG	1	1e-05	0
GAATGGCACAGAAGGCCCTAACTTCTACGTGCCCTTCTCCAATGCGATGGGTGTGGTACGCAGCCCCTTCGAGTACCCACAGTACTACCTGGCTGAGCCATG	1	1e-05	44GCCGGCCTCAGTGAGCGAGCGAGCGCGCAGAGAGGGAGTGGCCAAC
GAATGGCACAGAAGGCCCTAACTTCTACGTGCCCTTCTCCAATGCGATGGGTGTGGTACGCAGCCCCTTCGAGTACCCACAGTACTACCTGGCTGAGCCATG	1	1e-05	63CCCCTTCGTACCACA
GAATGGCACAGAAGGCCCTAACTTCTACGTGCCCTTCTCCAATG-GATGGGTGTGGTACGCAGCCCCTTCGAGTACCCACAGTACAACCTGGCTGAGCCATG	1	1e-05	0
GAATGGCACAGAAGGCCCTAACTTCTACGTGCCCTTCTCCAATGCGATGGGTGTGGTACGCAGCCCCTTCGAGTACCCACAGTACTACCTGGCTGAGCCATG	1	1e-05	43GAAAGGTCGCCCGGCCTCAGTGAGCGAGCGAGCGCGCAGAGAGGGAGTG
GAATGGCACAGAAGGCCCTAACTTCTACGTGCCCTTCTCCAAT-CGATGGGTGAGGTACGCAGCCCCTTCGAGTACCCACAGTACTACCTGGCTGAGCCATG	1	1e-05	0
GCATGGCACAGAAGGCCCTAACTTCTACGTGCCCTTCTCCAAT-CGATGGGTGTGCTACGCAGCCCCTTCGAGTACCCACAGTACTACCTGGCTGAGCCATG	1	1e-05	0
GAATGGCACAGAAGGCCCTAACTTCTACGTGCCC-------------------TGGTACGCAGCCCCTTCGAGTACCCACAGTACTACCTGGCTGAGCCATG	1	1e-05	0
GAATGGCACAGAAGGCCCTAACTTCTACGTGCCCTTCTCCA--GTGATGGGTGTGGTACGCAGCCCCTTCGAGTACCCACAGTACTACCTGGCTGAGCCATG	1	1e-05	0
GAATGGCATAGAAGGCCCTAACTTCTACGTGCCCTTCTCCAATGCGATGGGTGTGGTACGCAGCCCCTTCGAGTACCCACAGTACTACCTGGCTGAGCCATG	1	1e-05	44C
GAATGGCACAGAAGGCCCTAACTTCTACGTGCCCTTCTCCAATGCCATGGGTGTGGTACGCAGCCCCTTCGAGCACCCACAGTACTACCTGGCTGAGCCATG	1	1e-05	0
GAACGGCACAG-AGGCCC-AA-TT-TATGTGCCCTTCTCCAA--CGA--GGTGTGGT--GCAGCCCCTTCGAG--CCCGCAGTACTACCTGGC-GA-CCATG	1	1e-05	14GC22TA44TCAC59GG74AG94GA
GAATGGCACAGAAGGCACTAAATTCTACGTGCCCTTCTCCAATGCGATGGGTGTGGTACGCAGCCCCTTCGAGTACCCACAGTACTACCTGGCTGAGCCATG	1	1e-05	0
GAATGGCACAGAAGGCCCTAACTTCTACGTGCCCTTCTCCAATGCGATGGGTGTGGTACGCAGCCCCTTCGAGTACCCACAGTACTACCTGGCTGAGCCATG	1	1e-05	38C
GAATGGCACAGAAGGCCCTAACTTCTACGTGCCCTTCTCCAATGCGATGGGTGTGGTACGCAGCCCCTTCGAGTACCCACAGTACTACCTGGCTGAGCCATG	1	1e-05	44GAGGCCGCAGGAACCCCTAGTGATGGAGTTGGCCACTCCCTCTCTGCGCGCTCGCTCGCTCACTGAGGCCGGGCGACCTTT
GAATGGCACAGAAGGCCCTAACTTCTACGTGCCCTTCTCCAATGC-ATGGGTGTGGTACGCAGCCCCTTCGAGTACCCACAGTACTACCTGGCTGAGCCATG	1	1e-05	44TTGGC51CTCCCTCTC62CGC66CTC70C72C74CTCAC81AGGCCGGGC91ACCTT
GAATGGCACAGAAGGCCCTAACTTCTACGTGCCCTTCTCC-ATG-GATGGGTGTGGTACGAAGCCCCTCCGATTCCCCACAGTACTGCCTGGCTGAGCCATG	1	1e-05	42TG
GAATGGCACAGAAGGCCCTAACTTCTACGTGCCCTTCTCCAATG----------------------------------------CTACCTGGCTGAGCCATG	1	1e-05	0
GAATGGCACAGAAGGCCCTAACTTCTACATGCCCTTCTCCAA--CGATGGGTGTGGTACGCAGCCCCTTCGAGTACCCACAGTACTACCTGGCTGAGCCATG	1	1e-05	0
GAACGGCACAGAAGGCCCTAACTTCTACGTGCCCTTCTCCAATGCGATGGGTGTGGTACGCAGCCCCTTCGAGTAACCACAGTACTACCTGGCTGAGCCATG	1	1e-05	0
GAATGGCACAGATGGCCCTAACTTCTACGTGCCATTCTCCAATGCGATGGGTGTGGTACGCAGCCCCTTCGAGTACCCACAGTACTACCTTGCTGAGCCATG	1	1e-05	0
GAATGGAACAGAA-GCCCTAACTTATACGGGCGCTTCACCAATGCGATGGGTGTGGTACGCAGCCCCCTCGAGTACCCACAGTACTACCTGGCTGAGCCATG	1	1e-05	16A
GAATGGCACAGAAGGCCCTAACTTCTACGTGCCCTTCTCCAAT----T---TGTGGTACGCAGCCCCTTCGAGTACCCACAGTACTACCTGGCTGAGCCATG	1	1e-05	0
GAATGGCACAGAAGGCCCTAACTTCTACGTGCCCTTCTCCAATG---TGAGTGTGGTACGCAGCCCCTTCGAGTACCCACAGTACTACCTGGCTGAGCCATG	1	1e-05	0
GAATGGCACAGAAAGCCCTAACTTCTACGTGCCCTTCTCCAA-----------TGGTACGCAGCCCCTTCGAGTACCCACAGTACTACCTGGCTGAGCCATG	1	1e-05	0
GAATGGCACAGAAGGCCCTAACTTCTACGTGCCCTTCTCCAATGCGATGGGTGTGGTACGCAGCCCCTTCGAGTACCCACAGTACTACCTGGCTGAGCCATG	1	1e-05	44GGCGGCCTCAGTGAGCGAGCGAGCGCGCAGAGAGGGAGTGGCCAACTCCATCAC
GAATGGCACAGAAGGCCCTAACTTCTACGTGCCCTTCTCCAATGCGATGGGTGTGGTACGAAGCCCCTTCGAGTACCCACAGCACTACCTGGCTGAGCCATG	1	1e-05	0
GAATGGCACAGAAGGCCCTAACTTCTACGTGCCCTTCTCCAATGCGATGGGTGTGGTACGCAGCCCCTTCGAGTACCCACAGTACTACCTGGCTGAGCCATG	1	1e-05	44TTGGCCACTCCCTCTCTGCGCGCTCGCT74CTC78C80GAGGCCGCCCGGGCAAAGCCC
GAATGGCACAGAAGGCCCTAACTTCTACGTGCCCTTCTCCAATGCGATGGGTGTGGTACGCAGCCCCTTCGAGTACCCACAGTACTACCTGGCTGAGTCATG	1	1e-05	44CCCCCCACCAGATCAAGCACATTAAGGACTTCAAGGACTACAAGTACAGCCACCGGGTGGACAAGAAGCCTAAT
GAATGGCACAGAAGGCCCTAACTTCTACGTGCCCTTCTCCAATGCGATGGGTGTGGTACGCAGCCCCTTCGAGTACCCACAGTACTACCTGGCTGAGCCATG	1	1e-05	43GGCCCGGGCGGCCTCAGTGAGCGA
GAATGGCACAGAAGGCCCTAACTTCTACGTGCCCTTCTCCAATGCGATGGGTGTGGTACGCAGCCCCTTCGAGTACCCACAGTACTACCTGGCTGAGCCATG	1	1e-05	43TGCCCGGCCTCAGTGAGCGAGCGAGCGC72C
GAATGTCACAGAAGGCCCTAACTTCTACGTGCCCTTCTCC-ATTCGATGGGTGTGGTACGCAGCCTCTTCGAGTATCCACAGTACTACCTGGCTGAGCCATG	1	1e-05	0
GAATGGCACAGAAGGCCTTAACTTCCACGTGCCCTCCTCCAATGCGATGGGTGTGGTACGCAGCCCCTTCGAGTACCCACAGTACTACCTGGCTGAGCCATG	1	1e-05	0
GAATGGCACAGAAGGCCCTAACTTCTACGTGCCCTTCTCCAATGCGATGGGTGTGGTACGCAGCCCCTTCGGGTACCCACAGTACTACCTGGCTGAGCCATG	1	1e-05	44C
GAATGGCACAGAAGGCCCTAACTTCTACGCGCCCTTCTCCAATGCGACGGGTGTGGCACGCAGCACCTTCGAGTACCCACAGTACTACCTGGCTGAGCCATG	1	1e-05	0
GAATGGCACAGAAGGCCCTAACTTCTACGT-----------------------------GCAGCCCCTTCGAGTACCCACAGTACTACCTGGCTGAGCCATG	1	1e-05	0
GAATGGCACAGAAGGCCCTAACTTCTACGTGCCCTTCTCCAATGCGATGGGTGTGGTACGCAGCCCCTTCGAGTACCCACAGTACTACCTGGCTGAGCCATG	1	1e-05	40TTTGGTCGGGCGGCCTCAGTGAGCGAGCGAGCGCGCAGAG81GGG85G88GCCA
GAATGGCACAGAAGGCCCTAGCTTCTACGTGCCCTTCTCCAATGCGATGGGTGTGGTACGCACCCCCTTCGAGTACCCACAGTACTACCTGGCTGAGCCATG	1	1e-05	0
GAATGGCACAGAAGGCCCTAACTTCTACGTGCCCTTCTCCAATGCGATGGGTGTGGTACGCAGCCCCTTCGAGTACCCACAGTACTACCTGGCTGAGCCATG	1	1e-05	44CTTT
GAATGGCACAGAAGGCCCTAACTTCTACGTGCCCTTCTCCAAT-CGATGGGTGTGGTACGCAGCTCCTTCGAGTACCCACAGTACTACCTGGCTGAGCCATG	1	1e-05	0
GAATGGCACAGAAGGCCCTAACTTCTACGTGCCCTTCTCCAATGCGATGGGTGTGGTACGCAGCCCCTTCGAGTACCCACAGTACTACCTGGCTGGGCCATG	1	1e-05	41GTTGGTCGCCCGGCCTC59G61GAGCGAGCGAGCGCGCA
GAATGGCACAGAAGGCCCTAACTTCTACGTGCCCTTCTCCAATGCGATGGGTGTGGTACGCAGCCCCTTCGAGTACCCACAGTACTACCTGGCTGAGCCATG	1	1e-05	43GCCGCCCGGGCAAAGCCCGGGCGTCGGGCGACCTTTGGTCGCCCGGCCTCAGTGAGCGAGCGAGCGCGCA
GAATGGCACAGAAGGCCCTAACTTCTACGTGCCCTTCTCCAAT-CGATGGGTGTGGTACGCAGCCCCTTCGAGTACCCACAGTACTATCTGGCTGAGCCATG	1	1e-05	0
GAATGGCACAGAAGGCCCTAACTTCTACGTGCCCTTCTCCAATGCGACGGGTGTGGTACGCAGCCCCTTCGAGTACTCACAGTACTACCTGGCTGAGCCATG	1	1e-05	0
GAATGGCACAGAAGGCCCTAACTTCTACGTGCCCTTCTCCAATGCGATGGGTGCGGTACGCAGCCCCTTCGAGTACCCACAGTACTACCTGCCTGAGCCATG	1	1e-05	0
GAACGGCACAG-AGGCCC-AA-TT-TATGTGCCCTTCTCAAA--CGA-GGGTGTG---CGCAGCCCCTTCGAG--CCCGCAGTACTACCTGGC-GA-CCATG	1	1e-05	14GC22TT44TCAC51C54G74AG94GA
GAATGGCCCAGAAGGCCCTAACTTCTACGTGCCCTTCTCCAAT-CGATGGGTGTGATACGCAGCCCCTTCGAGTACCCACAGTACTACCTGGCTGAGCCATG	1	1e-05	0
GAATGGCACATAAGGCCCTAACTTCTATGTGCCCTTCTCCAATGCGATGGGTGTGGTACGAAGCCCCTTAGAGTACTCACAGTACTACCTGGCTGAGCCATG	1	1e-05	0
GAATGGCACAGAAGGCCCTAACTTCTACGTGCCCTTCTCCAATGCGATGGGTGTGGTACGCAGCCCCTTCGAGTACCCACAGTACTACCTGGCTGAGCCATG	1	1e-05	43GGCGCGCAGAGAGGGAGTGGCCAACTCCATCACTAGGGGTTCCTGCGGCCGCAAAAATCTCGCCAACAAGTTGACGAGATAAACAAGGC
GAATGGCACAGAAGGCCCTAACTTCTACGTGCCCTTCTCCAA-----------TGGTACGCAGCCCCTTCTAGTACCCACAGTACTACCTGGCTGAGCCATG	1	1e-05	0
GAATGGCACAGAAGGCCCTAACTTCTACGTGCCTTTCTCCAATGCGATGGGTGTGGTACGCAGCCCCTTCGAGTACCCACAGTACTACCTGGCTGAGCCATG	1	1e-05	43G
GAATGGCACAGAAGGCCC--ACTTCTACGTGCCC--CTCCAATGCGATGGGTGTGGTACGCAGCCCCTTCGAGTACCCACAGTACTACCTGGCTGAGCGATG	1	1e-05	15CT32A34T
GAACCGCACAG-AGGCCC-AA-TT-TATGTGCCCTTCTCCAA--CGA--GGCGTGGT--GCAGCCCCTTCGAG--CCCGCAGTACTACCTGGC-GA-CCATG	1	1e-05	14GC22TT44TCAC59GG74AG94GA
GAATGGCACAGAAGGCCCTAACTTCTACGTGCCCTTCTCCAATGCGATGGGTGTGGTACGCAGCCCCTTCGAGTACCCACAGTACTACCTGGCTGAGCCATG	1	1e-05	42GCAAAGGTCGCCCGACGCCCGGGCTTTGCCCGGGCGGCCTCAGTGAGCGAGCGAGCGCGCAGAGAGGGAG
GAACGGCACAGAAGGCCCTAACTTCTACGTGCCCTTCTCCAATGCGACGGGCGTGGTACGCAGCCCCTTCGAGCACCCGCAGTACTACCTGGCTGAGCCATG	1	1e-05	0
GAATGGCACAGAAGGCCCTAACTTCTACGTGCCCTTCTCCAATGCGATGGGTGTGGTACGCAGCCCCTTCGAGTACCCACAGTACTACCTGGCTGAGCCATG	1	1e-05	38CCTTGGTCGCCCGGCCTCAGTGAGCGAGCGAGCGCGCAGAGAGGGAGTGG92CTCCATCAC
GAATGGCACAGAAGGCCCTAACTTCTACGTGCCCTTCTCCAAT----------T--TACGCAGCCCCTTCGAGTACCCACAGTACTACCTGGCTGAGCCATG	1	1e-05	0
GAATGGCACAGAAGGGCCTAACTTCTACGTGCCCTTCTCCAATGCGATGGGTGTGGTACGCAGCCCCTTCGAGTACCCACAGTACTACCTGACTGAGCCATG	1	1e-05	0
GAATGGCACAGAAGGCCCT-ACTTCTACGTGCCCTTCTCCAATGCGATGGGTGTGGTACGCTGCCCCTTCGAGTACCCACAGTACTACCTGGCTGAGCCATG	1	1e-05	0
GAATGGCACAGAAGGCCCTAACTTCTACGTGCCCTTCTCCAAT--GA-----GTGGTACGCAGCCCCTTCGAGTACCCACAGTACTACCTGGCTGAGCCATG	1	1e-05	0
GGATGGCACAGAAGGCCCTAACTTCTACGTGCCCTTCTCCGATGCGATGGGTGTGGTACGCAGCCCCTTCGAGTACCCACAGTACTACCTGGCTGAGCCATG	1	1e-05	0
GGATGGCACAGAAGGCCCTAACTTCTACGTGCCCTTCTCCAATGCGATGGGTGTGGTACGCAGCCCCTTCGAGTACCCACAGTACTACCTGGCTGAGCCATG	1	1e-05	43G
GAATGGCCCAGAAGGCCCTAACTTCTACGTGCCCTTCTCCAA--CGATGGGTGTGGTACGCAGCCCCTTCGAGTACCCACAGTACTACCTGGCTGAGCCATG	1	1e-05	0
GAACGGCACAGAAGGCCCTAACTTCTATGTGCCCTTCTCCAATGCGATGGGCGTGGTACGCAGCCCCTTCGAGTACCCGCAGTACTACCTGGCTGAACCATG	1	1e-05	0
GAATGGCACAGAAGGCCCTAACTTCTACGTGCCCTTCTCCAATGCGATGGGTGCGGTACGCAGCCCCTTCGAGTACCCACAGTATTACCTGGCTGAGTCATG	1	1e-05	0
GAATGGCACAGAAGGCCCTAACTTCTACGTGCCCTTCTCCAATG---TGGGTGTGCTACG-AGCCC----GA----CCACAGTACTACCTGGCTGAGCCATG	1	1e-05	46C48C50C52C54C56C60C63T66G70GGG
GAATGGCACAGAAGGCCCTAACTTCTACGTGCCCTTCTCCAATGCGACGGGTGTGGTACGCAGCCCCTTCGAGTACCAACAGTACTACCTGGCTGAGCCATG	1	1e-05	0
GAATGGCACCGAAGGCCCTAACTTCTACGTGCCCTTCTCCAAT-CGATGGGTGTGGTACGCAGCCCCTTCGAGTACCCACAGTACTACCTGGCTGAGCCATG	1	1e-05	0
GAATGGCACAGAAGGCCCTAACTTCTACGTGCCCTTCTCCAATGAGATGGGTGTGGTACGCAGCCCCTACGAGTACCCACAGTACTACCTGGCTGAGCCATG	1	1e-05	0
GAATGGCACAGAAGGCTCTAACTTCTACGTGCCCTTCTCCAATG-G-TGGGTGTGGTACGCAGCCCCTTCGAGTACCCACAGTACTACCTGGCTGAGCCATG	1	1e-05	0
GAATGGCACAGAAGGCCCTAACTTCTACGTGCCCTTCTCCGATGCGATGGGTGTGGTACGCAGCCCATTCGAGTACCCACAGTACTACCTGGCTGAGCCATG	1	1e-05	0
GAATGGCACAGAAGGCCCTAACTTCTACGTGCCCTTCTCCAATGCGATGGGTGTGGTACGCAGCCCCTTCGAGTACCCACAGTACTACCTGGCTGAGCCATG	1	1e-05	44TTCGTGGCCGCCGGCCTTTTGCC68TTTTT77ATCTGAGGGTGCTTCTTAGATTTCACTTCATACA
GAATGGCACAGACGGCCCTAACTTCTACGTGCCCTTCTCCAATG-GATGGGTGTGGTACGCAGCCCCTTCGAGTACCCACAGTACTACCTGGCTGAGCCATG	1	1e-05	0
GAATGGCACAGAAGGCCCTAACTTCTACGTGCCCTTCTCC----CGATGTGTGTGGTACGCAGCCCCTTCGAGTACCCACAGTACTACCTGGCTGAGCCATG	1	1e-05	0
GAATGGCACAGAACGCCCTAACTTCTACGTGCCCTTCTCCAATGCGATGGGTGGGGTACGCAGCCCCTTCGAGTACCCACAGTACTACCTGGCTGAGCCATG	1	1e-05	0
GAATGGCACAGAAGGCCCTAACTTCTACGTGCCCTTCTCCAATGCGATGGG-G-GGTACGCAGCCCCTTCGAGTACCCACAGTACTACCTGGCTGAGCCATG	1	1e-05	50GC
GAATGGCACAGAAGGCCCTAACTTCTACGTGCCCTTCTCCAATGCGATGGGTGTGGTACGCAGCCCCTTCGAGTACCCACAGTACTACCTGGCTGAGCCATG	1	1e-05	44GGCCACTCCCTCTCTGCGCGCTCGCTCGCTCACTGAGGCCGCCCGGGCTT
GAATGGCACAGAAGGTCCTAACTTCTACGTGCCCTTCTCCAAT-CGATGGGTGTGGTACGCAGCCCCTTCGAGTACCCACAGTACTACCTGGCTGAGCCATG	1	1e-05	0
GAATGGCACAGAAGGCCCTAACTTCTACGTGCCCTTCTCTAAT-CGATGGGTGTGGTACGCAGCCCCTTCGAGTACCCACAGTACTACCTGGCTGAGCCATG	1	1e-05	0
GAATGGCACAGAAGGCCCTAACTTCTACGTGCCCTTCTCCAAGGCGATGGGTGTGGTACGCAGCCCCTTCGAGTACCCACAGTACTACCTGGCTGAGCCATG	1	1e-05	42C
GAATGGCACAGAAGGCCCTAACTTCTACGTGCCCTCCTCCAATGCGATGGGTGTGGTACGCAGCCCCTTCGAGTACCCACAGTACTACCTGGCGGAGCCATG	1	1e-05	0
GATTGGCACAGAAGGCCCTAACTTCTACGTGCCTTTCTCCAATGCGATGGGTGTGGTACGCAGCCCCTTCGAGTACCCACAGTACTACCTGGCTGAGCCATG	1	1e-05	0
GAATGGCACAGAAGGCCCTAACTTCTACGTGCCCTTCTCC----CGATGGGTGTGGTACGTAGCCCCTTCGAGTACCCACAGTACTACCTGGCTGAGCCATG	1	1e-05	0
GAATGGCACAGAAGGCCCTAACTTCTACGTGCCCTTCTCCAATGCGATGGGTGTGGTACGCAGCCCCTTCGAGTACCCACAGTACTACCTGGCTGAGCCATG	1	1e-05	44GTCGCCCGGCCTCAGTGAGCGAGCGAGCGC
TAATGGCACAGAAGGCCCTAACTTCTACGTGCCCTT--------CGATGGGTGTGGTACGCAGCCCCTTCGAGTACCCACAGTACTACCTGGCTGAGCCATG	1	1e-05	0
GAATGGCACAGAAGGCCCTAACTTCTACGTGCCCTTCTCCAATGCGACGGGTGTGGTACGCAGCCCCTTCGTGTACCCACAGTACTACCTGGCTGAGCCATG	1	1e-05	0
GAATGGCACAGAAGGCCCTAACTTCTACGTGCCCT---------CGATGGGTGTGGTACGCAGCCCCTTCGAGTACCCACAGTACTGCCTGGCTGAGCCATG	1	1e-05	0
GAATGGCACAGAAGGCACTAACTTCTACGTGCCCTTCTCCAATGCGATGGGTGTGGTACGCAGCCCCTTCGAGAACCCACAGTACTACCTGGCTGAGCCATG	1	1e-05	0
GAATGGCACAGAAGGTCCTAACTTCTACGTGCCCTTCTCCA-----ATGGGTGTGGTACGCAGCCCCTTCGAGTACCCACAGTACTACCTGGCTGAGCCATG	1	1e-05	0
GAATGGCACAGCAGGCCCTAACTTCTACGAGCCCTTCTCCAATGCGATGGGTGTGGTACGCAGCCCCTTCGAGTA-CCACAGTACTACCTGGCTGAGCCATG	1	1e-05	0
GAATGGCACAGAAGGCCCTAACTTCTACGTGCCCTTCTCCAAT--GATGGGTGTGGGACGCAGCCCCTTCGAGTACCCACAGTACTACCTGGCTGAGCCATG	1	1e-05	0
GAATGGCACAGAAGGCCCTAACTTCTACGTGCCCTTCTCCAATGCGATGGGTGTGGTACGCAGCCCCTTCGAGTACCCACAGTACTACCTGGCTGAGCCATG	1	1e-05	44TTGGCCACTCCCTCTCTGCGCGCTCGCTCGCTCA79T82GGCCGGGCC
GAATGGCACAGAAGGCCCTAACTTCTACGTGCCCTTCTCCAATGCGATGGGTGTGGTACGCAGCCCCTTCGAGTACCCACAGTACTACCTGGCTGAGCCATG	1	1e-05	44CCCGGCCTCTGTGAGCGAGCGAGCGCGCAGAGAGGGAGTGGCC
GAATGGCACAGAAGGCCCTAACTTCTACGTGCCCTTCTCCAATACGATGGGTGTGGCACGCAGCCCCTTCGAGTACCCACAGTACTACCTGGCTGAGCCATG	1	1e-05	42T
GAATGGCACAGAAGGCCCTAACTTCTACGTGCCCTTCTCCAATG-GATGGGTGTGGTACGCAGCCCCTTCGAGTACCCACAGTACTACCTGGCTGGGCCATG	1	1e-05	0
GAATGGCACAGAAGGCCCTAACTTCTACGTGCCCTTCTCCAATGCGATGGGTGTGGTACGCAGCCCCTTCGAGTACCCACAGTACTACCTGGCTGAGCCATG	1	1e-05	44CAAAGGTCGCCCGACGCCCGGGCTTTGCCCGGGCGGCCTCAGTGAGCGAGCGAGCGCGCAGAGAGGGAGTGGCCAA
GAATGGCACAGAAGGCCCTAACTTCTACGTGCCCTTCTCCAATGCGATGGGTGTGGTACGCAGCCCCTTCGAGTACCCACAGTACTACCTGGCTGAGCCATG	1	1e-05	43GGCTTTGCCCGGGCGGCCTCAGTGAGCGAGCGAGCGCGCAGAGAGGGAGTG
GAATGGCACAGAAGGCCCTAACTTCTACGAGCCCATCTCCAATGCGATGGGTGTGGTACGCAGCCCCTTCGAGTACCCACAGTACTACCTGGCTGAGCCATG	1	1e-05	0
GAATGGCACAGAAGGCCCTAACTTCTACGTGCCCTGCTCCAATGCGATGGGTGTGGTACGCAGCCCCTTCGAGTACCCACAGTACTACCTGGCTGAGCCATG	1	1e-05	0
GAATGGCACAGAAGGCCCTAACTTCTACGTGCCCTTCTCCAATGCGATGGGCGTGGTACGCAGCCCCTTCGAGTACCCACAGTACTACCTGGCTAAGCCATG	1	1e-05	0
GAATGGTACAGAAGGCCCTAACTTCTATGTGCCCTTCTCCAA--CGA--GGCGTGGT--GCAGCCCCTTCGAG--CCCGCAGTACTACCTGGC-GA-CCATG	1	1e-05	44TCAC59GG74AG94GA
GAATGGCACAGAAGGCCCTAACTTCTAGGTGCCCTTCTCCAATGCGATGGGTGTGGAACGCAGCCCCTTCGAGTACCCACAGTACTACCTGGCTGAGCCATG	1	1e-05	44AATGCGCCCTCGCTCGCTCACTGAGGCCGCC77GGCA
GAATGGTACAGAAGGCCCTAACTTCTACGTGCCCTTCTCC----CGATGGGTGTGGTACGCAGCCCCTTCGAGTACCCACAGTACTACCTGGCTGAGCCATG	1	1e-05	0
GAATGGCACAGAAGGCCCCAACTTCTACGTGCCCTTCTCCAATGCGATGGGTGTGGTACGCAGCCCCTTCGCGTACCCACAGTACTACCTGGCTGAGCCATG	1	1e-05	0
GAATGGCACAGAAGGCCCTAACTTCTACGTGCCCTTCTCCAATGCCACGGGTGTGGTACGCAGCCCCTTCGAGTACCCACAGTACTACCTGGCTGAGCCATG	1	1e-05	0
GAATGGCACAGAAGGCCCTAACTTCTACGTGCCCTTCTCCAAT-CGATGGGTGTGGTACGCAGCCCCTTCGAGTACCCACAGTACTACCTGGCGGAGCCATG	1	1e-05	0
GAATGGCACAGAAGGCCCTAACTTCTACGTGCCCTTCTCCAAT-CGATGGGTGTGGTACGCAGCCCCTTCTAGTACCCACAGTACTACCTGGCTGAGCCATG	1	1e-05	0
GAATGGCACCGAAGGCCCTAACTTCTACGTGCCCTTCTCCAATGCGACGGGCGTGGTACGCAGCCCCTTCGAGTACCCACAGTACTACCTGGCTGAGCCATG	1	1e-05	0
GAATGGCACAGAAGGCCCTAACTTCTACATGCCCTTCTCCAATG-GATGGGTGTGGTACGCAGCCCCTTCGGGTACCCACAGTACTACCTGGCTGAGCCATG	1	1e-05	0
GAATGGCACAGAAGGCCCTAACTTCTACGTGCCCTTCTCCAAT--GATGGGTG-GG-ACGCAGCCCCTTCGAGTACCCACAGTACTACCTGGCTGAGACATG	1	1e-05	46GG
GAAAGGCACAGAAGGCCCTAACTTCTACGTGCCCTTCTCCAAT-CGATGGGTGTGGTACGCAGCCCCTTCGAGCACCCACAGTACTACCTGGCTGAGCCATG	1	1e-05	0
GAATGGCACAGAAGGCCCTAACTTCTACGTGCCCTTCTCCAAT-C------TGTGGTACGCAGCCCCTTCGAGTACCCACAGTACTACCTGGCTGAGCCATG	1	1e-05	0
GAATGGCACAGAAGGCCCTAACTTCTACGTGCCCTTCTCCAATGCGATGGGTGTGGTACGCAGCCCCTTCGAGTACCCACAGTACTACCTGGCTGAGCCATG	1	1e-05	35GCCCGGGCGGCC49AG52GAGCGAGCGAGCG66G69GAGAGGG77G80GCCAA
GAATGGCACAGAAGGCCCTAACTTCTACGTGCCCTTCTCCAATGCGATGGGTGTGGTGCGCAGCCCCTTCGAGTACCCACAGTACTACCTGGCTGAGCCATG	1	1e-05	43G
GAATGGCACAGAAGGCCCTAACTTCTACGTGCCCTTCTCCAATGC-ATGGGTGTGGTACGCAGCCCCTTCGAGTACCCACAGTACTACCTGGCTGAGCCATG	1	1e-05	44TGGC50CTCCCTCTC61CGC65CTC69C71C73CTCAC79GA83CCCC
GAATGGCACAGAAGGCTCTAACTTCTACGTGCCCTTCTCCA-----ATGGGTGTGGTACGCAGCCCCTTCGAGTACCCACAGTACTACCTGGCTGAGCCCTG	1	1e-05	0
GAATGGCACAGAAGGCCCTAACTTCTACGTGCCCTTCTCCATTGCGATGGGTGTGGTACGCAGCCCCTTCAAGTACCCACAGTACTGCCTGGCTGAGTCATG	1	1e-05	0
GAATGGCACAGAAGGCCCTAACTTCTACGTGCCCTTCTCCAATGCGATGGGTGTGGTCCGCAGCCCCTTCGAGTACCCACAGTACTACCTGTCTGAGCCATG	1	1e-05	0
GAATGGCACAGAAGGCCCTAACTTCTACGTGCCCTTCTACAATGCGATGGGTGTGGTACGCAGCCCCTTCGAGTACCCACAGTACTACCTGGCTGAGCCATG	1	1e-05	43G
GAATGGCACAGAAGGCCCTAACTTCTACGTGCCCTTCTCCAATGCGATGGGTGTGGTACGCAGCCCCTTCGAGTACCCACAGTACTACCTGGCTGAGCCATG	1	1e-05	44CCGTCGCCCGGCCTCAGTGAGCGAGCGAGCGCGCAGAGAGGGAGTGGCCA
GAATGGCACAGAAGGCCCTAACTTCTACGTGCCCTTCTCCAAT------GGTGTGGTACGCAGCCCCTTCGAGTACCCACAGTACTACCTGGCTGAGCCATA	1	1e-05	0
GAATGGCACAGAAGGCCCTAACTTCTACGTGCCCTTCTCCAATGCGATGGGAGTGGTACTCAGCCCCTTCGAGTACCCACAGTACTACCTGGCTGAGCCATG	1	1e-05	0
GAATGGCACAGAAGGCCCTAACTTCTACGTGCCCTTCTCCAATGCGATGGGTGTGGTACGCAGCCCCTTCGAGTACCCACAGTACTACCTGGCTGAGCCATG	1	1e-05	44GCGAGATTTTTGCGGCCGCAGGAACCCCTAGTGATGGAGTTGGCCACTCCCTCTCTGCGCGCTCGCTCGCTCACTGAGGCCGGGCGACCA
GAATGGCACAGAAGGCCCTAACTTCTACGTGCCCTTCTCCAATGCGATGGGTGTGGTACGCAGCCCCTTCGAGTACCCACAGTACTACCTGGCTGAGCCATG	1	1e-05	43GCGGCCGCAGGAACCCCTAGTGATGGAGTTGGCCACTCCCTCTCTGCGCGCTCGCTCGCTCACTGAGGCCGGGC
GAATGGCACAGAAGGCCCTAACTTCTACGTGCCCTTCTCCAAT-CGATGGGTATGGTACGCAGCCCCTTCGAGTACCCACAGTACTACCTGGCTGAGCCATG	1	1e-05	0
GAATGGCACAGAAGGCCCTAACTTCTACGTGCCCTTCTCCAATGCGATGGGTGTGGTACGCAGCCCCTTCGAGTACCCACAGTACTACCTGGCTGAGCCATG	1	1e-05	43GTGAGGGTGCTTCTTAGATTTCACTTCATACAGGTTGCCCAGAATGTCTGTGCTGTACTTCTTAATGCTCTGGGTCTTG
GAATGGCACAGAAGGCCCTAACTTCTACGTGCCCTTCTCCAACGCGATGGGTGTGGTACGCAGCCCCTTCGAGTACCCACAGTACTCCCTGGCTGAGCCATG	1	1e-05	0
GAATGGCACAGAAGGCGCTAACTTCTACGTGCCCTTCTCCAATGCGATGGGTGTGGAACGCAGCCCCTTCGAGTACCCACAGTACTACCTGGCTGAGCCATG	1	1e-05	0
GAATGGCACTGAAGGCCCTAACTTCTACGTGCCCTTCTCCAA--CGATGGGTGTGGTACGCAGCCCCTTCGAGTACCCACAGTACTACCTGGCTGAGCCATG	1	1e-05	0
GAATGGCACAGAAGGCCCTAACTTCTAC--GCCCTTATCCAATGCGATGGGCGTGGTATGCAGCCCCTTCGAGTCCCCACAGTACTACCTGGCTGA-CCATG	1	1e-05	30G33A94G
GAATGGCACAGAAGGCCCTAACTTCTACGTGCCCTTCTCCAATGCCATGGGTGTGGTACGCAGCCCCTTCGAGTACCCACAGTACTACCTGGCTGTGCCATG	1	1e-05	0
GAATGGCACAGAAAGCCCTAACTTCTACGTGCCCTTCTCCAA--CGATGGGTGTGGTACGCAGCCCCTTCGAGTACCCACAGTACTACCTGGCTGAGCCATG	1	1e-05	0
GAATGGCACAGAAGGCCCTAACTTCTACGTGCCCTTCTCCAATGCGATGGGTGTGGTACGCAGCCCCTTCGAGTACCCACAGTACTACCTGGCTGAGCCATG	1	1e-05	63T
GAATGGCACAGAAGGCCCTAACTTCTACGTGCCCTTCTC-----CGATGGGTGTGGTACGCAGCCCCGTCGAGTACCCACAGTACTACCTGGCTGAGCCATG	1	1e-05	0
GAATGGCACAGAAGGCCCTAACCTCTACGTGCCCTTCTTCAATGCGCCGGGCGTGGCACGCAGCCCCTTCGAGTACCCACAGTACTACCTGGCTGAGCCATG	1	1e-05	0
GAATGGCACAGAAGGCCCTAACTTCTACGTGCCCTTCTCCAA-------------G--CGCAGCCCCTTCGAGTACCCACAGTACTACCTGGCTGAGCCATG	1	1e-05	0
GAATGGCACAGAAGGCCCTAACTTCTACGTGCCCTTCTCCAATACGATGGGTGTGGTACGCGGCCCCTTCGAGTACCCACAGTACTACCTGGCTGAGCCATG	1	1e-05	0
GAATGGCACAGAAGGCCCCAACTTCTACGCGCCCTTCTCCAATGCGATGGGTGTGGTACGCAGCCCCTTCGAGTACCCACGGTACTACCTGGCTGAGCCATG	1	1e-05	0
GAATGGCACAGAAGG-CCTAACTTCTACGTGCCCTTCTCCAATGCGTTGGGTGTGGTACGCAGCCCCTTCGAGTACCCACAGTACTACCTGGCTGAGCCATG	1	1e-05	0
GAATGGTACAGAAGGCCCTAACTTCTACGTGCCCTTCTCAAATGCGATGGGTGTGGAACGCAGCCCCTTCGAGTACCCACAGTACTACCTGGCTGAGCCATG	1	1e-05	0
GAATGGCACAGAAGGCCCTAACTTCTACGTGCCCTTCTCCAATGCGATGCGTGTGGTACGCAGCCCCTTCGAGTACCCACAGTACTACCTGGCTGAGCCATG	1	1e-05	43G
GAATGGCACAGAAGGCTCTAACTTCTACGTGCCCTTCTTCAATGCGATGGGTGTGGTACGCAGCTCCTTCGAGTTCCCACAGTACTACCTGGCTGAGCCATG	1	1e-05	0
GAATGGCACAGAAGGCCCTAACTTCTACGTGCCCTTCTCCAATGCGATGGGTGTGGTCCGCAGCCTCTTCGAGTACCCACAGTACTACCTGGCTGAGCCATG	1	1e-05	0
GAATGGCACAGAAGGCCCTAACTTCTACGTGCCCTTCTCCAATGCGATGGGTGTGGTACGCAGCCCCTTCGAGTACCCACAGTACTACCTGGCTGAGCCATG	1	1e-05	43GGGCCGGGCGGCCTCAGTGAGCGAGCGAGCGCGCAGAGAGGGAGTG
GAATGGCACAGAAGGCCCTAACTTCTACGTGCCCTTCTCCAATGCGATGGGGGTGGTACGCAGCCCCTTCGAGTACCCGCAGTACTACCTGGCGGAGCCATG	1	1e-05	43G
GAACGGCACAG-AGGCCC-AA-TT-TATGTGCCCTTCTCCAA--CGA-GGGTGTG---CGC--CCCCTTCGAG--CCCGCAGTACTACCTGGC-GA-CCATG	1	1e-05	14GC22TT44TCAC51C54G60GA74AG94GA
GAATGGCACAGAAGGCCCTAACTTCTACGTGCCCTTCTCCAATGCGATGGGTGTGGTACGCAGCCCCTTCGAGTACCCACAGTACTACCTGGCTGAGCCATG	1	1e-05	42AGCCCGGGCGGCCTCAGTGAGCGAGCGAGCGCGCAGAGAGGGAG88GCCAACTCCATCACTAGGGGTTCC
GAATGGCACAGAAGGCCCTAACTTCTACGTGCCCTTCTCCAATGCGATGGGTGTGGTACGCAGCCCCTTCGAGTACCCACAGTACTACCTGGCTGAGTCATG	1	1e-05	44T
GAATGGCACAGAAGGCCCTAACTTCTACGTGCCCTTCTCCAATGCGATGGGAGTGGTACGCAGCCCCTTCGAGTACCCACAGTACTACCTGGCTGAGCCATG	1	1e-05	44C
GAATGGCACAGAAGGCCCTAACTTCTACGTGCCCTTCTCCAATGCGATGGGTGTGGTACGCAGCCCCTTCGAGTACCCACAGTACTACCTGGCTGAGCCATG	1	1e-05	44TGGCCACTCCCTCTCTGCGCGCTCGCTCGCTCACTGAGGCCGGGCGACCAAAGGTCGCC
GAATGGCACAGAAGGCCC--ACTTCTACGTGCCCTTCTCCAATGCGATGGATGTGGTACGCAGCCCCTTCGAGTACCCACAGTACTACCTGGCTGAGCCATG	1	1e-05	15C20C
GAATGGCACAGAAGGCCCTAACTTCTACGTGCCCTTCTCCAATGC-ATGGGTGTGGTACACAGCCCCTTCGAGTACCCACAGTACTACCTGGCTGAGCCATG	1	1e-05	0
GAATGGCACAGAAGGCCCTAACTTCTACGTGCCCTTCTCCAATGCGATGGGTGTGGTACGCAGCCCCTTCGAGTACCCACAGTACTACCTGGCTGAGCCATG	1	1e-05	43GGGCCACTCCCTCTCTGCGCGCTCGCTCGCTCACTGAGGCCGG89ACCAA
GAATGGCACAGAAGGCCCTAACTTCTACGTGCCCTTCTCCAATGCGATGGGTGTGGTACGCAGCCCCTTCGAGTACCCACAGTACTACCTGGCTGAGCCATG	1	1e-05	44TTTTGCCCGGCCTCAGTGAGCGAGCGAGCGCGCAGAGAGGGAGTGGCCAACTCCATCACTAGGGGTTCCTGC
GAATGGCACAGAAGG-CCTAACTTCTACGTGCCCTTCTCCAATG-GATGGGTGTGGTACGCAGCCCCTTCGAGTACCCACAGTACTACCTGGCTGAGCCATG	1	1e-05	0
GAATGGCACAGAAGGCCCTAACTTCTACGTGCCCTTCTCCAATGCGATGGGTGTGGTACGCAGCCCCTTCGAGTACCCACAGTACTACCTGGCTGAGCCATG	1	1e-05	33AGGTCGCCCGACGCCCGGG55TGCCCGGGCGGC70AGTGAGCGAGCGAGCGCG90GAGAGGG98G101GCCAAC
GAATGGCACAGAGGGCCCTAACTTCTACGTGCCCTT--------CGATGGGTGTGGTACGCAGCCCCTTCGAGTACCCACAGTACTACCTGGCTGAGCCATG	1	1e-05	0
GAACGGCACAG-AGGCCC-AA-TT-TATGTGCCCTTCTCCAA--CGA--GGCGTGGT--GCAGCCCCTTCGAG--CCCGCAGTACTACCTGGC-G-GCCATG	1	1e-05	14GC22TT44TCAC59GG74AG95AT
GAACGGCACAG-AGGCCC-AA-TT-TATGTGCCCTTCTCCAA--CGA--GGCGTGGT--GCAGCCCCTTCGA--ACCCGCAGTACTACCTGGC-GA-CCATG	1	1e-05	14GC22TT44TCAC59GG74AG94GA
GAATGGCACAGAAGGCCCTAACATCTACGTGCCCTTCTCCAATGCGATGGGTGTGGCACGCAGCCCCTTCGAGTACCCACAGTACTACCTGGCTGAGCCATG	1	1e-05	0
GAATGGCACAGTAGGCCCTAACTTCTACGTGCCCTTCTCCAAT-CGATGGATGTGGTACGCAGCCCCTTCGAGTACCCACAGTACTACCTGGCTAAGCCATG	1	1e-05	0
GAATGGCACAGAAGGCCCTGACTTCTACGTGCCTTTCTCCAATGCGATGGGTGTGGTACGCAGCCCCTTCGAGTACCCACAGTACTACCTGGCTGAGCCATG	1	1e-05	0
GAATGGCACAGAAGGCCCTAACTTCTACGTGCCCTTCTCCAATGCGATGGGTGTGGTACGCAGCCCCTTCGAGTACCCACAGTACTACCTGGCTGAGCCATG	1	1e-05	51TGTGGCCATTGGCCACTCCCTCTCTGCGCGCTCGCTCGCTCACTGAGGCCGGGCGACCTT
GAATGGCACAGAAGGCCCTAACTTCTACGTGCCCTTCTCCAATGCGATGGGTGTGGTACGCAACCCCTTCGGGTACCCACAGTACTACCTGGCTGAGCCATG	1	1e-05	0
GAATGGCACAGAAGG-CCTAACTTCCACGTGGCCTTC-CC-ATGCGATGGGTGTGGTACGCAGCCCCTTCGAGTACCCACAGTACTACCTGGCTGAGCCATG	1	1e-05	35CC
GAATGGCACAGAAGGCCCTAACTTCTACGTGCCCTTCTCCAA-----------TGGTACGCAGCCCCTTCGAGTACCCACAGTACTACCTGACTGAGTCATG	1	1e-05	0
GAATGGCACAGAAGGCCCTAACTTCTACGTGCCCTTCTCCAA--C-----------TACGCAGCCCCTTCGAGTACCCACAGTACTACCTGGCTGAGCCATG	1	1e-05	0
GAATGGCACAGAAGGCCCTAACTTCTACGTGCCCTTCTCCAAT-CGATGGGTGTGGTACGCAGCCCCTTCGAGTACACACAGTACTACCTGGCTGAGCCATG	1	1e-05	0
GAATGGCACAGAAGGCCCTAACTTCTACGTGCCCTTCTCCAATGC-ATGGGTGTGGTTCGCAGCCCCTTCGAGTACCCACAGTACTACCTGGCTGAGCCATG	1	1e-05	62C
GAATGGCACAGAAGGCCCTAACTTCTACGTGCCCTTCTCCAATGCGATGGGTGTGGTACGCAGCCCCTTCGAGTACCCACAGTACTACCTGGCTGAGCCATG	1	1e-05	43GTTGGCCACTCCCTCTCTGCGCGCTCGCTCGCTCACTGAGGCCGGGC
GAATGGCACAGAAGGCCCTAACTTCTACGTGCCCTTCTCCAATGCGATGGGTGTGGTACGCAGCCCCTTCGAGTACCCACAGTACTACCTGGCTGAGCCATG	1	1e-05	44CAATGACAAGCTGAAAAAGCTGATCAACAAGAGCCCCGAAAAGCTGCTGATGTACCACCACGACCCCCAGACCTACCAGAAACTGAAGCTGA
GAATGGCACAGAAGGCCCTAACTTCTACGTGCCCTTCTCCAATGCGATGGGTGTGGTACGCAGCCCCTTCGAGTACCCACAGTACTACCTGGCTGGGCCATG	1	1e-05	43GG
GAATGGCACAGAAGGCCCTAACTTC-------------------CGATGGGTGTGGTACGCAGCCCCTTCGAGTACCCACAGTACTACCTGGCTGAGCCATG	1	1e-05	0
GAATGGCACAGAAGGCCCTAACTTCTACGTGCCCTTC-------CGATGGGTGTGGTACGCGGCCCCTTCGAGTACCCACAGTACTACCTGGCTGAGCCATG	1	1e-05	0
GAATGGCACAGAAGGCCCTAACTTCTACGTGCCCTTCTCCAATGCGACGGGTGTGGTACGCAGCCCCTTCGAGTACCCACAGTACTACCTGACTTAGCCATG	1	1e-05	0
GAATGGCACAGAAGGCCCTAACTTCTACGTGCCCTTCTCCAATGCGATGGGTGTGGTACGCAGCCCCTTCGAGTACCCACAGTACTACCTGGCTGAGCCATG	1	1e-05	44CCCCTAGTGATGGAGTTGGCCACTCCCTCTCTGCGCGCTCGCTCGCTCACTGAGGCCGGGCGACCTTT
GAATGG--CAGAAGGCCCTAACTTCTACGTGCCCTTCTCCAATGCGATGGGTGTGGTACGCAGCCCCTTCGAGTACCCACAGTACTACCTGGCTGAGCCATG	1	1e-05	5CC
GAATGGCACAGAAGGCCCTAACTTCTACGTGCCCTTCTCCAATGGGATGGGTGTGGGACGCAGCCCCTTCGAGTACCCACAGTACTACCTGGCTGAGCCATG	1	1e-05	0
GAATGGCACAGAAGGCCCTAACTTCTACGTGCCCTTCTCCAATGCGATGGGTGTGGTACGCAGCCCCTTCGAGTACCCACAGTACTACCTGGCTGAGCCATG	1	1e-05	43C46G
GAATGGCACAGAAGGCCCTAACTTCTACGTGCCCTTCTCCAATGCGATGGGTGTGGTACGCAGCCCCTTCGAGTACCCACAGTACTACCTGGCTGAGCCATG	1	1e-05	36CGGTCGCCCGGC51AGTGAGCGAGCGAGCGCG71GAGAGGG79G82GCC
GAATGGCACAGAAGGCCCTAACTTCTACGTGCCCTTCTCCAATGCGATGGGTGTGGTACGCAGCCCCTTCGAGTACCCACAGTACTACCTGGCTGAGCCATG	1	1e-05	44GGCGGCCTCAGTGAGCGAGCGAGCGCGCAGAGAGGGAGTGGCCAACT
GAATGGCACAGAAGGCCCTAACTTCTACGTGCCCTTCTCCAATGCGACGGGTGTAGTACGCAGCCCCTTCGAGTACCCACAGTACTACCTGGCTGAGCCATG	1	1e-05	0
GAATGGCACAGAAGGCCCTAACTTCTACGTGCCCTTCTCCAAT--GATGGGTGTGGTACGCAGCCCCTTCGAGCACCCACAGTACTACCTGGCTGAGCCATG	1	1e-05	0
GAATGGCACAGAAGGCCCTAACTTCTACGTGCCCTTCTCCAATGCGATGGGTGTGGTACGCAGCCCCTTCGAGTACCCACAGTACTACCTGGCTGAGCCATG	1	1e-05	44GTCGCCCGGCCTCAGTGAGCGAGCGAGCGCGCAGAGAGGGAGTGGCCAA
GAACGGCACAG-AGGCCC-AA-TT-TAC--GCCCTTCTCCAA--CGA--GGCGTGGT--GCAGCCCCTTCGAG--CCCGCAGTACTACCTGGC-GA-CCATG	1	1e-05	14GC22TT27TG44TCAC59GG74AG94GA
G-ATGGCACAGAAGGCCCTAACTTCTACGTGCCCTTCTCCAATGCGATGGGTGTGGTACGCAGCCCCTTCGAGTACCCACAGTACTACCTGGCTGAGCCATG	1	1e-05	0
GAATGGCACAGAAGGCCATAACTTCTACGTGCCCTTCTCCAATGCGATGGGTGTGGTACGCAGCCCCTTCGAGTACCCACAGTACTACCTGGCTGAGCCATG	1	1e-05	44C
GAATGGCACAGAAGGCCCTAACTTCTACGTGCCCTTCTCCAATGCGATGGGCGTGGTACGCAGCCCCTTCGAGTACCCACAGTACTACCTGTCTGAGCCATG	1	1e-05	0
GAATGGCACAGAAGGCCCTAACTTCTACGTGCCCTTCTCCAATGCGATGGGTGTGGTACGCAGCCCCTTCGAGTACCCACAGTACTACCTGGCTGAG-CATG	1	1e-05	0
GAATGGCACAGAAGGCCCTAACTTCTACGTGCC--------ATTCGATGGGTGTGGTACGCAGCCCCTTCGAGTACCCACAGTACTACCTGGCTGAGCCATG	1	1e-05	0
GAATGGCACAGAAGGCCCTAACTTCTACGTGACCTTCTCCAATTCGATGGGTGTGGTACGCAGCCCCTTCGAGTACCCACAGTACTACCTGGCTGAGCCATG	1	1e-05	0
GAATGGCACAGAAGGCCCTTACTTCTACGTGCCCTTCTCCAATGCGACGGGTGTGGTACGCAGCCCCTTCGAGTACCCACGGTACTACCTGGCTGAGCCATG	1	1e-05	0
GAACGGCACAG-AGGCCC-AA-TTGT--GTGCCCTTCTCCAA--CGA--GGCGTGGT--GCAGCCCCTTCGAG--CCCGCAGTACTACCTGGC-GA-CCATG	1	1e-05	14GC22TTT44TCAC59GG74AG94GA
GAATGGCACCGAAGGCCCTAACTTCTACGTGCCCTTCTCCAAT--GATGGGTGTGGTACGCAGCCCCTTCGAGTACCCACAGTACTACCTGGCTGAGCCATG	1	1e-05	0
GAATGGCACAGAAGGCCCTAACTTCTACGTGCCCTTCTCC----CGATGGGTGTGGTACGCAGCCCCTTCGAGTACCCACAGTACTACCTGGCTTAGCCATG	1	1e-05	0
GAATGGCACAGAAGGCCCTAACTTCTACGTGCCCTTCCCCAATGCGATGGGTGTGGTACGCAGCCCCTTCGAG--CCCGCAGTACTACCTGGC-GA-CCATG	1	1e-05	74AG94GA
GAATTGCACAGAAGGCCCTAACTTCTACGTGCCCTTCTCCAATGAGATGGGTTTGGTACGCAGCCCCTTCGAGTACCCACAGTACTACCTGGCTGAGCCATG	1	1e-05	0
GAATGGCACGGAAGGCCCTAACTTCTACGTGCCCTTCTCCAATG-GATGGGTGTGGTACGCAGCCCCTTCGAGTACCCACAGTACTACCTGGCTGAGCCATG	1	1e-05	0
GAATGGCACAGAAGGCCCTAACTTCTACGTGCCCTTCTCCAACGCGATGGGTGTGGTACGCAGCCCCTTCGAGTACCCACAGTACTACCTGGCTGGGCCATG	1	1e-05	0
GAATGGCACAGAAGGCCCTAACTTCTACGTGCCCGTCTCCAATG-GATGGGTGTGGTACGCAGCCCCTTCGAGTACCCACAGTACTACCTGGCTGAGCCATG	1	1e-05	0
GAATGGCACAGAAGGCCCTAACTTCTACGTGCCCTTCTCCAATG----GGGTGTGGCACGCAGCCCCTTCGAGTACCCACAGTACTACCTGGCTGAGCCATG	1	1e-05	0
GAATGGCACAGAAGGCCCTAACTTCTACTTGCCCTTCTCCAATGCGATGGGTGTGGAACGCAGCCCCTTCGAGTACCCACAGTACTACCTGGCTGAGCCATG	1	1e-05	44T
GAATGGCACAGAAGGCCCTAACTTCTACGTGCCCTTC------------GGTGTGGTACGCAGCCCCTTCGAGTACCCACAGTACTACCTGGCTGAGCCATG	1	1e-05	0
GAATGCCACAGAAGGCCCTAACTTCTACGTGCCCTCCTCCAATGCGATGGGTGTGGTACGCAGCCCCTTCGTGTACCCACAGTACTACCTGGCTGAGCCATG	1	1e-05	0
GAATGGCACAGAAGGCCCTAACTTCTACGTGCCCTTCTCCAATCCGACGGGTGTGGTACGCAGCCCCTTCGAGTACCCACAGTACTACCTGGCTGAGCCATG	1	1e-05	0
GAATGGCACAGAAGGC----------------------------------GTGTGGTACACAGCCCCTTCGAGTACCCACAGTACTACCTGGCTGAGCCATG	1	1e-05	0
GAATGGCACAGAAGGCCCTAACTTCTACGTGCCCTTCTCCAATGCGATGGGTGTGGTACTCAGCCCCTTTGAGTACCCACAGTACTACCTGGCTGAGCCATG	1	1e-05	0
GAATGGCACAGAAGGCCCTAACTTCTACGTGCCCTTCTCCAATGCGATGGGTGTGGCACGCAGCCCCTTCGAGTACCCACAGTACTACCTGGCTGAGCCATG	1	1e-05	44C
GAATGGCACAGAAGGCCCTAACTTCTACGTGCCCTTCTCCAATGCGATGGGTGTGGTACGCAGCCCATTCGAGTACCCACAGTACTACCTGGCTGAGCCATG	1	1e-05	43G
GAATGGCACAGAAGGCCCTAACTTCTACGTGCCCTTCTCCAATGCGATGGGTGTGGTACGCAGCCCCTTCGAGTACCCACAGTACAACCTGGCTGAGCCATG	1	1e-05	43G
GAATGGCACAGAAGGCCCTAACTTCTACGTGCCCTTCTCCAATGCGATGGGTGTGGTACGCAGCCCCTTCGAGTACCCACAGTACTACCTGGCTGAGCCATG	1	1e-05	44TGCCCGGGCGGCCTCAGTGAGCGAGCGAGCGCGCAGAGAGGGAGTGGCCA
GAATGGCACAGAAGGCCCTAACTTCTACGTGCCCTTCTCCAATGCGATGGGTGTGGTACGCAGCCCCTTCGAGTACCCACAGTACTATCTGGCTGTGCCATG	1	1e-05	0
GAATGGCACAGAAGGCCCTAACTTCTACGTGCCCTTCTCCAA-------GGTGTGGTACGCAGCCCCTTCGAGTACCCACAGTACTACCTGGCTGAGCCATG	1	1e-05	0
GAATGGCACAGAAGGCCCTACCTTCTACGGGCCCTTCTCCACTGCGATGGGTGTGGTACGCAGCCCCTTCGAGTACCCACAGTACTACCTGGCTGAGCCATG	1	1e-05	0
GAATGGCACAGAAGGCCCTAACTTCTACGTGCCCTTCTCCAATGCGATGGGTGTGGTACGCAGCCCCTTCGAGTACCCACGGTACTACCTGGCTAAGCCATG	1	1e-05	0
GAATGGCACAGAAGGCCCTAACTTCTACGTGCCCTTCT------CGATGGGTGTGGTACGCAGCCCCTTCGAGTACCCACAGTACTACCCGGCTGAGCCATG	1	1e-05	0
GAATGGCACAGAAGGCCCTAACTTCTACGTGCCCTTCTCCAATGCGATGGGTGTGGTACGCAGCCCCTTCGAGTACCCACGGTACTACCTGGCTGAGCCATG	1	1e-05	44GC
GAATGGCACAGAAGGCCCTAACTTCTACGTGCCCTTCTCCA-----ATGGGTGTGGTACGCAGCCCCTTCGAGTACCCACGGTACTACCTGGCTGAGCCATG	1	1e-05	0
GAATGGCACAGAAGGCCCTAACTTCTACGTGCCCTTCTCCAATGCGATGGGTGTGGTACGCAGCCCCTTCGAGTACCCACAGTACTACCTGGCTGAGCCATG	1	1e-05	44CGAT
GAATGGCACAGAAGGCCATAACTTCCACGTGCCCTTCTCCAATGCGATGGGTGTGGTACGCAGCCCCTTCGAGTACCCACAGTACTACCTGGCTGGGCCATG	1	1e-05	0
GAATGGCACAGAAGGCCCTAACTTCTACGTGCCCTTCTCCAATGCGATGGGTGTGGTACGCAGCCCCTTCGAGTACCCACAGTACTACCTGGCTGTGCCATG	1	1e-05	44T
GAATGGCACAGAAGGCCCTAACTTCTACGTGCCCTTCTCCAAT-CGATGGGGGTGGTACGCAGCCCCTTCGAGTACCCGCAGTACTACCTGGCTGAGCCATG	1	1e-05	0
GAATGGCACAGAAGGCCCTAACTTCTACGTGCCCT------------TGGGTGTGGTACGCAGCCCCTTCGAGTACCCATAGTACTACCTGGCTGAGCCATG	1	1e-05	0
GAACGGCACAG-AGGCCC-AA-TT-TATGTGCCCTTTTCCAA--CGA--GGCGTGGT--GCAGCCCCTTCGAG--CCCGCAGTACTACCTGGC-GA-CCATG	1	1e-05	14GC22TT44TCAC59GG74AG94GA
GAATGGCACAGAAGGCCCTAACATCTACGTGCCCTTCTCCAAT--GA-GGGTGTGGTACGCAGCCCCTTCGAGTACCCACAGTACTACCTGGCTGAGCCATG	1	1e-05	0
GAATGGCACAGAAGGCCCTAACTTCTACGTGCCCTTCTCCAA--CGATGGGTGTGGTACGCAGCCCCTTCGAGTACCCACAGTACTACCTGGCTGAGCCATG	1	1e-05	40AA
GAATGGCACAGAAGGCCCTAACTTCCACGTGCCCTTCTCCAATG-----------------------------------CAGTACTACCTGGCTGAGCCATG	1	1e-05	0
GAATGGCACAGAAGGCCCTGACTTCTACGTGCTCTTCTCCAAT-CGATGGGTGTGGTACGCAGCCCCTTCGAGTACCCACAGTACTACCTGGCTGAGCCATG	1	1e-05	0
GAATGGCACAGAAGGCCCTATCTTCTACGTGCCCTTCTCCAATGCGATGGGTGTGGTACGCAGCCCCTTCGAGTACCCACAGTACTACCTGGCTGAGCCATG	1	1e-05	0
GAATGGCACAGAAGGCCCTAACTTCTACGTGCCCTTCTCCAATGCGACGGGTGGGGTACGCAGCCCCTTCGAGTACCCACAGTCCTACCTGGCTGAGCCATG	1	1e-05	0
GAATGGCACAGAAGGCCCTAACTTCTACGTGCCCTTCTCCAATGCGATGGGTGTGGTACGCAGCCCCTTGGAGTACCCACAGTACTACCTGGCTGAGCCATG	1	1e-05	44A
GAACGGCACAG-AGGCCC-AACTTTTATGTGCCCTTCTCCAA--CGA--GGCGTGGT--GCAGCCCCTTCGAG--CCCGCAGTACTACCTGGC-GA-CCATG	1	1e-05	14GC44TCAC59GG74AG94GA
GAATGGCACAGAAGGCCCTAACTTCTACGTGCCCTTCTCCAATGCGATGGGTGTGGTACGCAGCCCCTTCGAGTACCCACAGTACTACCTGGCCGAGCCATG	1	1e-05	44TGGCCACTCCCTCTCTGCGCGCTCGCTCGCTCACTGAGGCCGGGCGACCAAAGGTCGCCCGACGCC
GAATGGCACAGAAGGCCCTAACTTCTACGTGCCCTTCTCCAAT--GATGGGTGTGGTACGCAGCCCCTTCGAGTACCCACAGTACTACCTGGCCGAGCCATG	1	1e-05	0
GAATGGCACAGAAGGCCCTAACTTCTACGTGCCCTTCTCCAATGCGATGGGTGTGGTACGCAGCCCCTTCGAGTACCCACAGTACTACCTGGCTGAGCCATG	1	1e-05	44GTCGCCCGGCCTCAGTGAGCGAGCGAGCGCGCAGAGAGGGAGTGGCCA
GAATGGCACAGAAGGCCCTAACTTCTACGTGCCCTTCTCCAA-----------TGGTACGCACCCCCTTCGAGTACCCACAGTACTACCTGGCTGAGCCATG	1	1e-05	0
GAATGGCACAGAAGGCCCTAACTTCTACGTTCCCTTCTCCAATGCGATGGGTTTGGTACGCAGCCCCTTCAAGTACCCACAGTACTACCTGGCTGAGCCATG	1	1e-05	0
GAATGGCACAGAAGGCCCTAACTTCTACGTGTCCTTCTCCAATGCGATGGGTGTGGTACGCAGCCCCTTCGAGTACCCACAGTACTACCTGGCTGAGCCATG	1	1e-05	44T
GAACGGCACAGAAGGCCCTAACTTCTACGTGCCCTTCTCCAATGCGATGGATGTGGTACGCAGCCCCTTCGAGTACCCACAGTACTACCTGGCTGAGCCATG	1	1e-05	0
GAATGGCACAGAAGGCCCTAACTTCTACGTGCCCTTCTCCAAT--GATGGGTGTGGAACGCAGCCCCTTAGAGTACCCACAGTACTACCTGGCTGAGCCATG	1	1e-05	0
GAATGGCACAGAAGGCCCTAACTTCTACGTGCCCTTCTCCAATGCGATGGGTGTGGTACGCAGCCCCTTCGAGTACCCACAGTACTACCTGGCTGAGCCATG	1	1e-05	44AAAGCCCGGGCGGCCTCAGTGAGCGAGCGAGCGCGCAGAGAGGGAGTGGCCAACTCCA
GTATGGCACAGATGGCCCTAACTTCTACGTGCTCTTCTCCAATGCGATGGGTGTGGTACGCAGCACCTTCAAGTACCCACAGTACTACCTG--TGAATCATG	1	1e-05	92TT
GAATGGCACAGAAGGCCCTAACTTCTACGTGCCCTTCTCCAATGCGATGGGTGTGGTACGCAGCCCCTTCGAGTACCCACAGTACTACCTGGCTGAGCCATG	1	1e-05	35CGGG40CGCCCGGC51AGTGAGCGAGCGAGCGCG71GAGAGGG79G82GCC
GAACGGCACAGAAGGCCCTAACTTCTACGTGCCCTTCTCCAATGCGATGGGTGTGGTACGCAGCCCCTTCGAGTACCCACAGTACTACCTGGCTGAGCCACG	1	1e-05	0
GAATGGCACAGAAGGCCCTAACTTCTACGTGCCCTTCTCCA-----ATGGGTGTGATACGCAGCCCCTTCGAGTACCCACAGTACTACCTGGCTGAGCCATG	1	1e-05	0
GAATGGCTCAGAAGGCCCTAACTTCTACGTGCCCTTCTCCAATGCGACGGGTGTGGTACGCAGCCCCTTCGAGTACCCACAGTACTACCTGGCTGAGCCATG	1	1e-05	0
GAATGGCACAGAAGGCCCTAACTTCTACGTGCCCTTCTCCA-----ATGGGCGTGGTACGCAGCCCCTTCGAGTACCCACAGTACTACCTGGCTGAGCCATG	1	1e-05	0
GAATGGCACAGAAGGCCCTAACTTCTACGTGCCCTTCTCCAAT-CGATGGGTGTGGTACGCAGCCCCTTCGAGTACCAACAGTACTACCTGGCTGAGCCATG	1	1e-05	0
GAATGGCACAGAAGGCCCTAACTTCTACGTGCCCTTCTCCAAT-CGATGGGTGTGGTACGCAGCCCCTTCGAGTACCCACAGTACTACCTGGCTGTGCCATG	1	1e-05	0
GAATGGCACAGAAGGCCCTAACTTCTACGTGCCCTTCTCCAATGCGATGGGTGTGGTACGCAGCCCCTTCGAGTACCCACAGTACTACCTGGCTGAGCCATG	1	1e-05	44TTGGCCACTCCCTCTCTGCGCGCTCGCTCGCTCACTGAGGCCGGGCGACCAA
GAATGGCACAGAAGGCCCTAACTTCTACGTGCCCTTCTCCAATGCGATGGGTGTGGTACGCAGCCCCTTCGAATACCCACAGTACTACCTGGCTGAGCCATG	1	1e-05	44CGCCCGGCCTCAGTGAGCGAGCGAGCGCGCAGAGAGGGAGTGGCCAAC
GAATGGCACAGAAGGCCCTAACTTCTACGTGCCCTTCTCCAATGCGATGGGTGTGGTACGCAGCCCCTTCGAGTACCCACAGTACTACCTGGCTGAGCCATG	1	1e-05	47TGGGTGTGGTACGCAGCCC
GAATGGCACAGAAGGCCCTAACTTCTACGTGCCCTTCTCCAATGCGATGGGTGTGGTACGCAGCCCCTTCGAGTACCCACAGTATTACCTGGCTGGGCCATG	1	1e-05	0
GAATGGCACAGAAGGCCCTAACTTCTACGTGCCCTTCTCCAATGCGATGGGTGTGGTACGCAGCCCCTTCGAGTACCCACAGTACTACCTGGCTGAGCCATG	1	1e-05	43TAGAGGCCGCAGGAACCCCTAGTGATGGAGTTGGCCACTCCCTCTCTGCGCGCTCGCTCGCTCACTGAGGCCGGGCGAC
GAATGGCACAGAAGGCCCTAACTTCTACGTGCCCTTCTCCAA--CGATGGGTGTGGTACGCAGCCCCTCCGAGTACCCACAGTACTACCTGGCTGAGCCATG	1	1e-05	0
GAATGGCACAGAAGGCCCTAACTTCTACGTGCCCTTCTCCAATGCGATGGGTGTGGTACGCAGCCCCTTCGAGTACCCACAGTACTACCTGGCTGAGCCATG	1	1e-05	44GGCGGCCTCAGTGAGCGAGCGAGCGCGCAGAGAGGGAGTGGCCAACTCCATCACTAGGGGTTCCTGCGGCCGCAAAAA
GAATGGCACAGAAGGCCCTAACTTCTACGTGCCCTTCTCCAATGCGATGGGTGTGGTACGCAGCCCCTTCGAGTACCCACAGTACTACCTGGCTGAGCCATG	1	1e-05	44GCCGGGCGGCCTCAGTGAGCGAGCGAGCGCGCA
GAATGGCACAGAAGGCCCTAACTTCTACGTGCCCTTCTCCAATG----GGGTGTGGTACGCAGCCCCTTCGTGTACCCACAGTACTACCTGGCTGAGCCATG	1	1e-05	0
GAATGGCACAGAAGGCCCTAACTTCTACGTGCCCTTCTCCAATGCGATGGGTGTGGTACGCAGCCCCTTCGAGTACCCACAGTACTACCTGGCTGAGCCATG	1	1e-05	36TGGTCGCCCGGC51AGTGAGCGAGCGAGCGCG71GAGAGGG79G82GCCAA
GAATGGCACAGAAGGCCCTAACTTCTACGTGCCCTTCTCCAATGCGATGGGTGTGGTACGCAGCCCCTTCGAGTACCCACAGTACTTCCTGGCTGAGCCATG	1	1e-05	43G
GAATGGCACAGAAGGCCCTAACTTCTACGTGCCCTTCTCCAATGCGACGGGTGTGGTACGTAGCCCCTTCGAGTACCCACAGTACTACCTGGCTGGGCCATG	1	1e-05	0
GAAGGGCACAGAAGGCCCTAACTTCTACGTGCCCTTCTCCAAT-CGATGGGTGTGGTACGCAGCCCCTTCGAGTACCCACAGTACTACCTGGCTGAGCCATG	1	1e-05	0
GAATGGCACAGAAGGCCCTAACTTCTACGTGCCCTTCTCCAATGCGATGGGTGTGGTACGCAGCCCCTTCGAGTACCCACAGTACTACCTGGCTGAGCCATG	1	1e-05	44GGGCCACTCCCTCTCTGCGCGCTCGCTCGCTCACTGAGGCCGCCC
GAATGGCACAGAAGGCCCTAACTTCTACGTGCCCTTCTCCAATGCGATGGGTGTGGTACGCAGCCCCGTCGAGTACCCACAGTACTACCTGGCTGAGCCATG	1	1e-05	43G
GAATGGCACAGAAGGCCCTAACTTCTACGTGACCTTCTCCA-----ATGGGTGTGGTACGCAGCCCCTTCGAGTACCCACAGTACTACCTGGCTGAGCCATG	1	1e-05	0
GAATGGCACCGAAGGCCCTAACTTCTACGTGCCCTTCTCCAA--CGATGGGTGTGGTACGCAGCCCCTTCGAGTACCCACAGTACTACCTGGCTGAGCCATG	1	1e-05	0
GAATGGCACAGAAGGCCATAACTTCTACGTGCCCTTCTCCAATGCGATGGGTGTGGTACGCAGCCCCTTCGAGTACCCACAGCACTACCTGGCTGAGCCATG	1	1e-05	0
GAATGGCACATAAGGCCCTAACTTCTACGTGCCCTTCTCCAA--CGATGGGTGTGGTACGCAGCCCCTTCGAGTACCCACAGTACTACCTGGCTGAGCCATG	1	1e-05	0
GAATGGAACAGCAGGCCCTAACTTCTACGTGCCCTTCTCCAATGCGATGGGTGTGGTACGCAGCCCCTTCGAGGACCCACAGTACTACCTGGCTGAGCCATG	1	1e-05	0
GAATGGCACAGAAGGCCCTGACTTCTACGTGCCCTTCTCCAATGCG-TGGGTGTGGTACGCAGCCCCTTCAAGTACCCACAGTACTACCTGGATGAGCCATG	1	1e-05	47C
GAATGGCACAGAAGGCCCTAACTTCTACGTGCCCTTCTCC--T-CGATGGGTGTGGTACGCAGCTCCTTCGAGTACCCACAGTACTACCTGGCTGAGCCATG	1	1e-05	0
GAATGGCACAGAAGGCCCTAATTTCTACGTGCCCTTCTCCAAT-CGATGGGTGTGGTACGCAGCCCCTTCGAGTACCCACAGTACTACCTGGCTGAGCCATG	1	1e-05	0
GAATGGCACAGAAGGCCCTAACTTCTACGTGCTCTTCTCCAATGCGATGGGTGTGGTACGCAGCCCCTTCGAGTACCCACAGTACTACCTGGCTGGGCCATG	1	1e-05	0
GAATGGCACAGAAGGCCCCAATTTCTACGTGCCCTTCTCCAATGC---GGGTGTGGTACGCAGCCCCTTCGAGCACCCGCAGTACTACCTGGCTGAACCATG	1	1e-05	42CG46A
GACTGGCACAGAAGGCCCTAACTTCTACGTGCCCTTCTCTAATGCGATGGGTGTGGTACGCAGCCCCTTCGAGTACCCACAGTACTACCTGGCTGAGCCATG	1	1e-05	0
GAACGGCACAG-AGGCCC-AA-TT-TATGTGCCCTTCTCCAA--CGA--GGCGTGGT--GCAGCCCCTTCGAGCACCCGCAGTACTACCTGGC-GA-CCATG	1	1e-05	14GC22TT44TCAC59GG94GA
GAATGGCACAGAAGGCCCTAACTTCTACGTGCCCTTCTCCAATGCGATGGGTGTGGTACGCAGCCCCTTCGAGTACCCACAGTACTACCTGGCTGAGCCATG	1	1e-05	44CCCCCCACCAGATCAAGCACATTAAGGACTTCAAGGACTACAAGTACAGCCACCGGGTGGACAAGAAGCCTAAT
GAATGGCACAGAAGGCCCTAACTTCTGCGTGCCCTTCTCCAATGCGATGGGTGTGGTACGCAGCCCCTTCGAGTACCCACAGTACTACCTGGCTGAGCCATG	1	1e-05	43GC
GAATGGCACAGAAGGCCCTAACTTCTACGTGCCCTTCTCCAATGCGATGGGTGTGGTACGCAGCCCCTTCGAGTACCCACAGTACTACCTGGCTGAGCCATG	1	1e-05	44CGGGCGGCCTCAGTGAGCGAGCGAGCGCGCAGAGAGGGAGTGGCCAACTCCATCACTAGGGGTTCCTGCGGC
GAATGGCACAGAAGGCCCTAACTTCTACGTGCCCTTCTCCAATGCGATGGGTGTGGTACGCAGCCCCTTCGAGTACCCACAGTACTACCTGGCTGAGCCATG	1	1e-05	41AT
GAATGGCACAGAAGGCCCTAACTGCTACGTGCCCTTCTCCAATGCGATGGGTGTGGTACGCAGCCCCTTCGAGTACCCACAGTACTACCTGGCTGAGCCATG	1	1e-05	0
GAATGGCACAGAAGGCCCTAACTTCTACGTGCCCTTCTC--------TGGGTGTGGTACGCAGCCCCTTCGAGTACCCACAGTACTACCTGGCTGAGCCATG	1	1e-05	0
GAATGGCACAGAAGGCCCCAA-TT-TATGTGCCCTTCTCCAA--CGA---GTGTGGT--GCAGCCCCTTCGAG--CCCGCAGTACTACCTGGC-GA-CCATG	1	1e-05	22TT44TCAC51C59GG74AG94GA
GAATGGCACAGAAGGCCCTAACTTCTACGTGCCCTTCTCCAATGCGATGGGTGTGGTACGCAGCCCCTTCGAGTACCCACAGTACTACCTGGCTGAGCCATG	1	1e-05	44GGGTCGCCCGGCCTCAGTGAGCGAGCGAGCGCGCAGAGAGGGAGTGGCCAACTCCATCACTAGGGGT
GAATGGCACAGAAGGCCCTAACTTCTACGTGCCCTTCTCCAATGCGATGGGTGTGGTACGCAGCCCCTTCGAGTACCCACAGTACTACCTGGCTGAGCAATG	1	1e-05	43G
GAATGGCACAGAAGGCCCTAACTTCTACGTGACCTTCTCCAATGCGATGGGTGTGGTACGCAGCCCCTTCGAGTACCCACAGTACTACCTGGCTGAGCCATG	1	1e-05	67A
GAATGGCACAGAA-GCCCTAACTTCTACGTGCCCTTCTCCAATGCGATGGGTGTGGTACGCAGCCCCTTCGAGTACCCACAGTACTACCTGGCTGAGCCATG	1	1e-05	0
GAATGGCACAGAAGGCCCTAACTTCTACGTGCCCTTCTCCAATGCGATGGGTGTGGTACGCAGCCCCTTCGAGTACCCACAGTACTACCTGGCT-AGCCATG	1	1e-05	0
GAATGGCACAGAAGGCCCTAACTTCTACGTGCCCTTCTCCAA--CGATGGGTGGGGTACGCAGCCCCTTCGAGTACCCACAGTACTACCTGGCTGAGCCATG	1	1e-05	0
GAATGGCACAGAATGCCCTAACTTCTACGTGCCCTTCTCCAATGCGATGGGTGTGGCACGCAGCCCCTTCGAGTACCCACAGTACTACCTGGCTGAGCCATG	1	1e-05	0
GAATGGCACAGAAGGCCCTAACTTCCACGTGCCCTTCTCCAATGCGATGGGTGTGGTACGCAGCCCCTTCGAGTACCCACAGTACTACCTGGCTGAGCCATG	1	1e-05	44TTGGCCACTCCCTCTCTGCGCGCTCGCTCGCTCACTGAGGCCGGGCGACCA
GAACGGCACAGAAGGCCCTAACTTCTACGTGCCCTCCTCCAATGCGATGGGTGTGGTACGCAGCCCCTTCGAGTACCCACAGTACTACCTGGCTGAGCCATG	1	1e-05	0
GAATGGCACAGAAGGCCCTAACTTCTACGTGCCCTTCTCCAATGCGATGGGTGTGGTACGCAGCCCCTTCGAGCACCCGCAGTACTACCTGGCTGAACCATG	1	1e-05	0
GAATGGCACAGAAGGCCCTAACTTCTACGTGCCCTTCTCCAATGCGATGGGTGTGGTACGCAGCCCCTTCGAGTACCCACAGTACTACCTGGCTGAGCCATG	1	1e-05	44TTGGCCACTCCCTCTCTACGCGCTCGCTCGCTCACTGAGGCCGCC91GGCA
GAATGGCACAGAAGGCCCTAACTTCTACGTGCCCTTCTCCAATGCGATGGGTGTGGTACGCAGCCCCTTCGAGTACCCACAGTACTACCTGGCTGAGCCATG	1	1e-05	40GCCA46GGTCGCCCGACGCCCGGGCTTTGCCCGGGCGGCCTCAG86AGCGAGCGAGCGCGCA
GAATGGCACAGAAGGCCCTAACTTCTACGTGCCCTTCTCCAATGCGAT-GGT-TGGTACGCAGCCCCTTCGAGTACCCACAGTACTACCTGGCTGAGCCATG	1	1e-05	50AT
GAATGGCACAGAAGGCCCTAACTTCTACGTGCCC------------------GTGGTACGCAGCCCCTTCGAGTACCCACAGTACTACCTGGCTGAGCCATG	1	1e-05	0
GAATGGCACAGAAGGCCCTAACTTCTACGTGCCCTTCTCCAAT------GGTGTGGTACGCAGCCCCTTTGAGTACCCACAGTACTACCTGGCTGAGCCATG	1	1e-05	0
#NAME?	1	1e-05	0
GAATGGCACAGAAGGCCCTAACTTCTACGTGCCCTTCTCCAATG----GGGTGTGGTACGCAGCCCCTTCGGGTACCCACAGTACTACCTGGCTGAGCCATG	1	1e-05	0
GAATGGCACAGAAGGCCCTAACTTCTACGTGCCCATCTCCAATGCGATGGGTGTGGTACGCAGCCCCTTCGAGTACCCACAGTACTACCTGGCTGAGCCATG	1	1e-05	44C
GAATGGCACAGAAGGCCCTAACTTCTACGTGCCCTTCTCCAATGCGATGGGTGTGGTACGCAGCCCCTTCGAGTACCCACAGTACTACCTGGCTGAGCCATG	1	1e-05	44TTGGCCACTCCCTCTCTGCGCGCTCGCTCGCTCACTGAGGCCGGGCGGGCGGCCTCAGTGAGCGAGCGAGCGCGCAGAGAGGGAGTGGCCAA
GAATGGCACAGAAGGCCCTAACTTCTACGTGCCCTTCTCCAATGCGATGGGTGTGGTACGCAGCCCCTTCGCGTACCCGCAGTACTACCTGGCTGTGCCATG	1	1e-05	44TTTGCCCGGGCGGCCTCAGTGAGCGAGCGAGCGCGCAGAGAGGGAGTGGCCTTGGC
GAATGGCACAGAAGGCCCTAACTTCTACGTGCCCTTCTCCAA--CGATGGGTGTGGTACGCAGCACCTTCGAGTACCCACAGTACTACCTGGCTGAGCCATG	1	1e-05	0
GAATGGCACAGAAGGCCCTAACTTCTACGTGCCCTTCTCCAATGCGATGGGTGTGGTA--CAGCCCCTTCGAGTACCCACAGTACTACCTGGCTGAGCCATG	1	1e-05	59TT
GAATGGCACAGAAGGCCCTAACTTCTACGTGCCCTTCTCCAAT-CGATGGGTGTGGTACGCAGCCCCTTCGAGTACCCACAGTACTACATGGCTGAGCCATG	1	1e-05	0
GAATGGCACAGAAGGCCCTAACTTCTACGTGCCCTTCTCCAATGCGATGGGTGTGGTACGCAGCCCCTTCGAGTACCCATAGTACTACCTGGCTGAGCCATG	1	1e-05	67T
GAATGGCACAGAAGGCCCTAACTTCTACGTGCCCTTCTCCAATGCGATGGGTGTGGTACGCAGCCCCTTGGAGTACCCACAGTACTGCCTGGCTGAGCCATG	1	1e-05	48GG
GAATGGCACAGAAGGCCCTAACTTCTACGTGCCCTTCTCCAATGCGATGGGTGTGGTACGCAGCCCCTTCGAGTACCCACAGTACTACCTGGCTGAGCCATG	1	1e-05	42GGCGGCCTCAGTGAGCGAGCGAGCGCGCAGAGAGGGAG82GCCAACTCCATCACTAGGGGTTC
GAATGGCACAGAAGGCCCTAACTTCTACGTGCCCTTCTCCAATGCGATGGGTGTGGTACGCAGCCCCTTCGAGTACCCACAGTACTACCTGGCTGAGCCATG	1	1e-05	35GCCCGGGCGGCC49AG52GAGCGAGCGAGCG66G69GAGAGGG77G80GCCA
GAATGGCACAGAAGGCCCTAACTTCTACGCGCCCTTCTCCAATGCGATGGGTGTGGCACGCAGCCCCTTCGAGTACCCACAGTACTACCTGGCTGAGCCATG	1	1e-05	0
GAACGGCACAG-AGGCCC-AA-TT-TATGTGCCCTTCTCCAA--CGA--GGCGTGGT--GCAGCCCCTTCGAG--CCCGCAGCACTACCTGGC-GA-CCATG	1	1e-05	14GC22TT44TCAC59GG74AG94GA
GCATGGCACAGAAGGCCCTAACTTCTACGTGCCCTTCTCCAA--CGATGGGTGTGGTACGCAGCCCCTTCGAGTACCCACAGTACTACCTGGCTGGGCCAGG	1	1e-05	0
GAATGGCACAGAAGGCCCTAACTTCTACGTGCCCTTCTCCAATGCGAT-GGTG-GGTACGCAGCCCCTTCGAGTACCCACAGTACTACCTGGCTGAGCCATG	1	1e-05	53TC
GAATGGCACAGAAGGCCCTAACTTCTACGTGCCCTTCTCCAATGCGATGGGTGTGGTACGCAGCCCCTTCGAGTACCCACAGTACTACCTGGCTGAGCCATG	1	1e-05	41GCCCGGGCGGCCTCAGTGAGCGAGCGAGCGCGCAGAGAGGG83G86GCCAAC
GAATGGCACAGAAGGCCCTAACTTCCACGTGCCCTTCTCCAATGCGATGGGTGTGGTACGCAGCCCCTTCGAGTACCCACAGTACTACCTGGCTGAGCCATG	1	1e-05	44T
GAATGGCACAGAAGGCCCTAACTTCTACGTGCCCTTCTCCAATG-GATGGGTGTGGAACGCAGCCCCTTCGAGTACCCACAGTACTACTTGGCTGAGCCATG	1	1e-05	0
GAATGGCACAGAAGGCCCTAACTCCTACGTGCCCTTCTCC----CGATGGGTGTGGTACGCAGCCCCTTCGAGTACCCACAGTACTACCTGGCTGAGCCATG	1	1e-05	0
GAATGGCACAGAAGGCCCTAACTTCTACGTGACCTTCTCTAATGCGACGGGTGTGGTACGCAGCCCCTTCGAGTACCCACAGTACTACCTGGCTGAGCCATG	1	1e-05	0
GAATGGCACAGAAGGCCCTAACTTCTACGTGCCCTT--------------GTGTGGTACGCAGCCCCTTCGAGTACCCACAGTACTACCTGGCTGAGCCATG	1	1e-05	0
GAATGGCACAGAAGGCCCTAACTTCTAC----------------------GTGTGGTACGCAGCCCCTTCGAGTACCCACAGTACTACCTGGCTGAGCCATG	1	1e-05	0
GAATGGCACAGAAGGCCCTAACTTCTACGTGCCCTTCTCCACTGCGATGGGTGCGGTACGCAGCCCCTTCGAGTACCCACAGTACTACCTGGCTGAGCCATG	1	1e-05	0
GAATGGCACAGAAGGCCCTAACTTCTACGTGCCCTTCTCCAAT-CGATGGGTGTGGTACGCAGCCCCTTCGAGTACCCACAGTACCACCTGGCTGAGCCATG	1	1e-05	0
GAATGGCACAGAAGGCCCTAACTTCTACGTGCCCTTCTCCAATGCGATGGGTGTGGTACGCAGCCACTTCGAGTACCCACAGTACTACCTGGCCGAGCCATG	1	1e-05	0
GAATGGCACAGAAGGCCCTAACTTCTACGTGCCATTCTCCAATGCGATGGGTGTGGTACGCAGCCCCTTAGAGTACCCACAGTACTACCTGGCTGAGCCATG	1	1e-05	0
GAATGGCACAGAAGGCCTTAACTTCTACGTGCCCTTCTCCAATGCGATGGGTGTGGAACGCAGCCCCTTCGAGTACCCATAGTACTACCTGGCTGAGCCATG	1	1e-05	0
GAATGGCACAGAAGGCCCTAACTTCTACGTGCCCTTCTCCAATGCGATGGGTGTGGTACGCAGCCCCATCGAGTACCCACAGTACTACCTGGCTGAGCCATG	1	1e-05	41ATGCG
GAATGGCACAGAAGGCCCTAACTTCTACGTGCCCTTCTCCAATGCGATGGGTGTGGTACGCAGCCCCTTCGAGTACCCACAGTACTACCTGGCTGAGCCATG	1	1e-05	44TTTTGCGGCCGCAGGAACCC65TAGT72GGAGTTGGCCACTCCCTCTCTGCGCGCTCGCTCGCTCACTGAGGCCGCC
GAATGGCACAGAAGGCCCTAACTTCTACGTGCCCTTCTCCAAT--GA---GTGTGGTACGCAGCCCCTTCGAGTACCCACAGTACTACCTGGCTGAGCCATG	1	1e-05	0
GAATGGCACAGAAGG-CCTAACTTCTACGTGCCCTTCTCCAATGCGATGGGTGTGGTACGCAGCCCCTTCGAGTACCCACAGTACTACCTGGTTGAGCCATG	1	1e-05	0
GAATGGCACAGAAGGCCCTAACTTCTACGTGCCCTTCTCCAATGCGATGGGTGTGGTACGCAGCCCCTTCGAGTACCCACAGTACTACCTGGCTGAGCCATG	1	1e-05	42GGTCGCGCGGCCTCAGTGAGCGAGCGAGCGCGCAGAGAGGGAG87GCT
GAATGGCACAGAAGGCCCTAACTTCTACGTGCCCTTCTCCAATGCGATGGGTGTGGTACGCAGCCCCTTCGAGTACCCACAGTACTACCTGGCTGAGCCATG	1	1e-05	42GGTCGCCCGGCCTCAG59GAGCGAGCGAGCGCGCAGA
GAATGGCACAGAAGGCCCTAACTTCTACGTGCCCTTCTCCAATGCGACGGGTGGGGTACGCAGCCCCTTCGAGTACCCACAGGACTACCTGGCTGAGCCATG	1	1e-05	0
GAACGGCACAG-AGGCCC-AA-TT-TATGTGCCCTTCTCCAA--CGA--GGCGTGGT--GCAGCCCCTTCGAG--CCCA-AGTACTACCTGGC-GA-CCATG	1	1e-05	14GC22TT44TCAC59GG74AG78G94GA
GAATGGCACAGAAGGCCCTAACTTCTACGTGCCCTTCTCCAATGCGACGGGTGTGGTACGCAGCCCCTTCGAATACCCACAGTACTACCTGCCTGAGCCATG	1	1e-05	0
GAATGGCACAGACGGCCCTAACTTCTACGTGCCCTTCTCC-ATGCGATGGGTGTGGTACGCAGCCCCTTCGAGTACCCACAGTACTACCTGGCTGAGCCATG	1	1e-05	0
GAATGGCACAGAAGGCCCTAACTTCTACGTGCCCTTCTCCAATGCGATGGGTGTGGTACGCAGCCCCTTCGAG--CCCGCAGTACTACCTGGCGGAGCCATG	1	1e-05	74AG
GAATGGCACAGAAGGCCCTAACTTCTACGTGCCCCTCTCCAATG-GATGGGTGTGGTACGCAGCCCCTTCGAGTACCCACAGTACTACCTGGCTGAGCCATG	1	1e-05	0
GAACGGCGCAG-AGGCCC-AA-TT-TATGTGCCCTTCTCCAA--CGA--GGCGTGGT--GCAGCCCCTTCGAG--CCCGCAGTACTACCTGGC-GA-CCATG	1	1e-05	14GC22TT44TCAC59GG74AG94GA
GAATGGCACAGAAGGCCCTAACTTCTACGTGCCCTTCTCAAATGGGATGGGTGTGGTACGCAGCCCCTTCGAGTACCCACAGTACTACCTGGCTGAGCCATG	1	1e-05	0
GGATGGCACAGAAGGCCCTAACTTCTACGTGCCCTTCTCCAATGCGATGGGCGTGGTACGCAGCCCCTTCGAGTACCCACAGTACTACCTGGCTGAGCCATG	1	1e-05	44A
GAATGGCACAGAAGGCCCTAACTTCTACGTGCCCTTCTCCAATGCGACGGGCGTGGTACGCAGCCCATTCGAGTACCCACAGTACTACCTGGCTGAGCCATG	1	1e-05	0
GAATGGCACAGAAGGCCCTAACTTCTACGTGCCCTTCTCCAA--CGATGGGTGTGGTACGCAGCCCCTACGAGTACCCACGGTACTACCTGGCTGGGCCATG	1	1e-05	0
GAATGGCACAGAAGGCCCTAACTTCTACGTGCCCTTCTCCAAT-CGGTGGGTGTGGTACGCAGCCCCTTCGAGTACCCACAGTACTACCTGGCTGAGCCATG	1	1e-05	0
GAATGGCACTGAAGGCCCTAGCTTCTACGTGCCCTTCTCCAATG-GATGGGTGTGGTACGCAGCCCCTTCGAGTACCCACAGTACTACCTGGCTGAGCCATG	1	1e-05	0
GAATGGCACAGAAGGCCCTAACTTCTACGTGCCCTTCTCCAATGCGATGGGTGTGGTACGCAGCCCCTTCGAGTACCCACAGTACTACCTGGCTGAGCCATG	1	1e-05	44TGTGCGCTCTGCCCCTCGAGTCTAGAGGCCGCAGGAACCCCTAGTGATGGAGTTGGCCACTCCCTCTCTGCGCGCTCGCTCGCTCACTGAGGCCGGGCGAC
GAATGGCACAGAAGGCCCTAACTTCTACGTGCCCTTCTCCAATGC-A--GGCGTGGT--GCAGCCCCTTCGAG--CCCGCAGTACTACCTGGC-GA-CCATG	1	1e-05	44TCA59GG74AG94GA
GAATGGCACAGAAGGCCCTAACTTCTACGTGCCCTTCTCCAATGCGATGGGTGTGGTACGCAGCCCCTTCGAGTACCCACAGTACTACCTGGCTGAGCCATG	1	1e-05	44GCCACTCCCTCTCTGCGCGCTCGCTCGCTCACTGAGGCCGCC
GAACGGCACAGAGGGCCC-AATTT-TATGTGCCCTTCTCCAA--CGA--GGCGTGGT--GCAGCCCCTTCGAG--CCCGCAGTACTACCTGGC-GA-CCATG	1	1e-05	20AT44TCAC59GG74AG94GA
GAATGGCACAGAAGGCCCTAACTTCTACGTGCCCTTCTCCAATGCGATGGGTGTGGTACGCAGCCCCTTCGAGTACCCACAGTACTACCTGGCTGAGCCATG	1	1e-05	44CCGTGTTTATCTCGTCAACTTGTTGGCGAGATTTTTGCGGCCGCAGGAACCCCTAGTGATGGAGTTGGCCACTCCC
GAATGGCACAGAAGGCCCTAACTTCTACGTGCCCTTCTCCAATGCGATGGGTGTGGTACGCAGCCCCTTCGAGTACCCATAGTACTACCTGGCTGAACCATG	1	1e-05	0
GAATGGCACAGAAGGCCCTAACTTCTACGTGCCCTTCTCCAAT--GATGGGTGTGGTACGCAGCCCCTTCGAGTACCCACAGTATTACCTGGCTGAGCCATG	1	1e-05	0
GAATGGCACAGAAGGCCCTAACTTCTACGTGCCCTTCTCCAATGCGATGGGTGTGGTACGCAGCCCCTTCGGGTACCCACAGTACTACCTGGCTGAGCTATG	1	1e-05	0
GAACGGCACAG-AGGCCC-AA-TT-TATGTGCCCTTCTCCAATGCG-TG---GTG---CGGAGCCCCTTCGAG--CCCGCAGTACTACCTGGC-GA-CCATG	1	1e-05	14GC22TT42CT45CACAG74AG94GA
GAATGGCACAGAAGGCCCTAACTTCTACGTGCCCTTCTCCAATGCGATGGGTGTGGTACGCAGCCCCTTCGAGTACCCACAGTACTACCTGGCTGAGCCATG	1	1e-05	36GGGCGGC46AGTGAGCGAGCGAGCGCG66GAGAGGG74G77GCCAACTC
GAATGGCACAGAAGGCCCTAACTTCTACGTGCCCTCCTCCAATGCGATGGGTGAGGTACGCAGCCCCTTCGAGTACCCACAGTACTACCTGGCTGAGCCATG	1	1e-05	0
GAATGGCACAGAAGGCCCTAACTTCTACGTGCCCTTCTCCAATGCGATGGGTGTGGTA-GCAGCCCCTTCGAGTACCCACAGTACTACCTGGCTGAGCCATG	1	1e-05	0
GAATGGCACAGAAGGCCCTAACTTCTACGTGCCCTTCTACAATGCGACGGGTGTGGTACGCAGCCCCATCGAGTACCCACAGTACTACCTGGCTGAGCCATG	1	1e-05	0
GAATGGCACAGAAGGCCCTAACTTCTACGTGCCCTTCTCCAATGCGATGGGTGTGGTACGCAGCCCCTTCGAGTACCCACAGTACTACCTGGCTGAACCATG	1	1e-05	41ATGCG
GCATGGCACAGAAGGCCCTAACTTCTACGTGCCCTTCTCCAATGCGATGGGTGTGGTACGCAGCCCATTCGAGTACCCACAGTACTACCTGGCTGAGCCATG	1	1e-05	0
GAATGGCACAGAAGGCCCTAACTTCTACGTGCCCTTCTCCAAT-CGATGGGTGTGGTGCGCAGCCCCTTCGAGTACCCACAGTACTACCTGGCTGAGCCATG	1	1e-05	0
GAATGGCACAGAAGGCCCTAACTTCTACGTGCCCTTCTCCAATG---TGTGTGTGGTACGCAGCCCCTTCGAGTACCCACAGTACTACCTGGCTGAGCCATG	1	1e-05	0
GA--GGCACAG-AGGCCC-AA-TT-TATGTGCCCTTCTCCAA--CGA--GGCGTGGT--GCAGCCCCTTCGAG--CCCGCAGTACTACCTGGC-GA-CCATG	1	1e-05	3CG14GC22TT44TCAC59GG74AG94GA
GAATGGCACAGAAGGCCCTAACTTCTACGTGCCCTTCTCCAATGCGATGGGTGTGGTACGCAGCCCCTTCGAGTACCCACAGTACTACCTGGCTGAGCCATG	1	1e-05	44TGGCCACTCCCTCTCTGCGCGCTCGCTCGCTCACTGAGGCCGGGCGAC
GAATGGCACAGAAGGCCCTAACTTCTACGTGCCCTTC----------------TGGTACGCAGCCCCTTCGAGTACCCACAGTACTACCTGGCTGAGCCATG	1	1e-05	0
GAATGGCACAGAAGGCCCTAACTACTACGTGCCCTTCTCCAAT--GATGGGTGTGGTACGCAGCCCCTTCGAGTACCCACAGTACTACCTGGCTGAGCCATG	1	1e-05	0
GAATGGCACAGAAGGCCCTAACTTCTACGTGCCCTTCTCCAATG-GGTGGGTGTGGTACGCAGCCCCTTCGAGTACCCACAGTACTACCTGGCTGAGCCATG	1	1e-05	0
GAATGGCACAGAAGGCCCTAACTTCTACGTTCCCTTCTCCAATGCGATGGGTGT--TACGCAGCCCCTTCGAGTACCCACAGTACTACCTGGCTGAGCCATG	1	1e-05	50CT
GAATGGCACAGAAGGCCCTAACTTCTACGTGCCCTTC-------CGATGGGTGTGGTATGCAGCCCCTTCGAGTACCCACAGTACTACCTGGCTGAGCCATG	1	1e-05	0
GAACGGCACAG-AGGCCC-AA-TT-TATGTGCCCTTCTCCAACGCGA--GGCGTGGT--GCAGCCCCTTCGAG----CACAGTACTACCTGGCGGAGCCATG	1	1e-05	14GC22TT46AC59GG75GCTG
TAATTGCACATAAGGCCCTAACTTCTACTTGCCCTTCTCCAATGCGATGGGTGTGGTACGCAGCCCCTTCGAGTACCCACAGTACTACCTGGCTGAGCCATG	1	1e-05	0
GAATGGCACAGAAGGCCCTAACTTCTACGTGCCCTTCTCCAATG-GATGGGTGTGGTACGCAGCCCCTTCGAGTACCCACAGTACTACCTGTCTGAGCCATG	1	1e-05	0
GAATGGCACAGAAGGCCCTAACTTCTACGTGCCCTTCTCCAATG-GATGGGTGTGGTACGCAGCCCCTTCGAGTACCCACAGTACTACCTGGCTGAGCCGTG	1	1e-05	0
GAATGGCACAGAAGGCCCTAACTTCTACGTGCCCTTCTCCAA--CGATGGGTGTGATACGCAGCCCCTTCGAGTACCCACAGTACTACCTGGCTGAGCCATG	1	1e-05	0
GAATGGCACAGAAGGCCCTAACTTCTACGTGCCCTTCTCCAATGCGATGGGTGTGGTACGCAGCCCCTTCGAGTACCCACAGTACTACCTGGCTGCGCCACG	1	1e-05	0
GAATGGCACAGAAGGCCCTAACTTCTACGCGCCCTTCTCCAATGCGATGGGTGTGGTACGCAGCCCCTTCGTGTACCCACAGTACTACCTGGCTGAGCCATG	1	1e-05	0
GAATGGCACAGAAGGCCCTAACTTCTACGTGCCCTTCTCCAATGCGATGGGTGTGGTACGCAATCCCTTCGAGTACCCACAGTACTACCTGGCTGAGCCATG	1	1e-05	0
GAATGGCACATAAGGCCCTAACTTCTACGTGCCCTTCTCCAATGCGATGGGTGTGGTACGCACCCCCTTCGAGTACCCACAGTACTACCTGGCTGAGCCATG	1	1e-05	0
GAATGGCACAGAAGGCACTAACTTCTACGTGCCCTTCTCCAA--CGATGGGTGTGGTACGCAGCCCCTTCGAGTACCCACAGTACTACCTGGCTGAGCCATG	1	1e-05	0
GAATGGCACAGAAGGCCCTAACTTCTACGTACCCTTCTCCAATGCGATGGGTGTGGTACGCAGCCCCTTCGAGTACCCACAGTACTACCTGGCTGAGCCATG	1	1e-05	44A
GAATGGCACAGAAGGCCCTAACTTCTTCGTGCCCTTTTCCAA-GCGATGGGCGTGGTACGCAGCCCCTTCGAGTACCCACAGTACTACCTGGCTGAGCCATG	1	1e-05	0
GAATGGCACAGAAGGCCCTAACTTCTACGTGCCCTTCTCCAA------GGGTGTGGTACGCAGCCCCTTCGAGTACCCACAGTACTACCTGGCTGAGCCATG	1	1e-05	0
GAATGGCACAGAAGGCCCTAACTTCTACGTGCCCTTCTCCAATGCGATGGGTGTGGTACGCAGCCCCTTCGAGTACCCACAGTACTACCTGGCTGAGCCATG	1	1e-05	45TCTCTGCGCGCTCGCTCGCTCACTGAGGCCGCCCGG82CAA
GAATGGCACAGAAGGCCCTAACTTCTACGTGCCCTCCTCCAAT-CGATGGGTGTGGTACGCAGCCCCTTCGAGTACCCACAGTACTACCTGGCTGAGCCATG	1	1e-05	0
GAATGGCACAGAAGGCCCTAATTTCTACGTGCCCTTCTCCAATGCGATGGGTGTGGTACGCAGCCCCTTCGAGTACCCACAGTACTACCTGGCTGAGCCATG	1	1e-05	45GATGG
GAATGGCACAGAAGGCCCTAACTTCTACGTGCCCTTCTCCAATG-GATGGGTGTGGTACGCAGCCCCTTCGAGTACCCAAAGTACTACCTGGCTGAGCCATG	1	1e-05	0
GAATGGCACAGAAGGCCCTAACTTCTACGTGCCCTTCTCCAATGCGATGGGTGTGGTACGCAGCCCCTCCGAGTACCCACAGTACTACCTGGCTGAGCCATG	1	1e-05	42GGTCGCCCGGCCTCAG59GAGCGAGCGAGCGCGCA
GAATGGCACAGAAGGCCCTAACTTCTACGTGCCCTTCTCCAATGCGATGGGTGTGGTACGCAGCCCCTTCGAGTACCCACAGTACTACCTGGCTGAGCCATG	1	1e-05	33AGGTCGCCCGACGCCCGGG55TGCCCGGGCTGC70AGTGAGCGAGCGAGCGCG90GAGAGGG98G101GCCAAC
GAACGGCACAG-AGGCCC-AA-TT-TATGTGCCCTTCTCCAA--CGA--GGCGTGGT--GCAGCCCCTTCGAG--CCCGCAGTACTACCTGGTTGAGCCATG	1	1e-05	14GC22TT44TCAC59GG74AG
GAATGGCACAGAAGGCCCTAACTTCTACGTGCCCTTCTCCAATGCGATGGGTGTGGTACGCAGCCCCTTCGAGTACCCACAGTACTACCTGGCTGAGCCATG	1	1e-05	44GCGGCCTCAGTGAGCGAGCGAGCGCGCAGAGAGGGAGTGGCC
GAATGGCACAGAAGGCCCTAACTTCTACGTGCCCTTCTCCAATGCGATGGGTGTGGTACGCAGCCCCTTCGAGTACCCACAGTACTACCTGGCTGAGCCATG	1	1e-05	41TTTGGTCGCCCGTCCTC59G62AGCGAGCGAGCGCGCAGAGAGGGAGT
GAATGGCACAGAAGGCCCTAACTTCTACGCGCCCTTCTCCAATGCGATGGGTGTGGTACGCAGCCCCTTCGAGTACCCACAGTACTACCTGGCTGAGCCATG	1	1e-05	43G
GAATGGCACAGAAGGCCCTAACTTCTACGTGACCTTCTCCAATGCGATGGGTGTGGTACGCAGCCCCTTCGAGTACACACAGTACTACCTGGCTGAGCCATG	1	1e-05	0
GAATGGCACAGAAGGCCCTAACTTCTAC--GCCCTTCTCCAATGCGATGGGTGTGGTACGCAGCCCCTTCGAGTACCCACAGTACTACCTGGCTGAGCCATG	1	1e-05	30G32A
GAATGGCACAGAAGGCCCTAAC---GACG---------CCAATGCGATGGGTGTGGTACGCAGCCCCTTCGAGTACCCACAGTACTACCTGGCTGAGCCATG	1	1e-05	19G21GCG25G29G33G36GAGAGGG44G47GC
GAATGGCACAGAAGGCCCTAACTTCTACGTGCCCTTCTCCAATGCGATGGGTGTGGGACGCAGCCCCTTCGAGAACCCACGGTACTACCTGGCTGAGCCATG	1	1e-05	0
GAATGGCACAGAAGGCCCTAACTTCTACGTGCCCTTCTCCAATGCGACGGGTGTGGTACGCAGCCCCTTCGAGTACCTACAGTACTACCTGGCTGGGCCATG	1	1e-05	0
GAATGGCACAGAAGGCCCTAACTTCTACGTGCCCTTCTCCAATG---TGGGTGTGGTATGCAGCCCCTTCGAGTACCCACAGTACTACCTGGCTGAGCCATG	1	1e-05	0
GAACGGCACAG-AGGCCC-AA-TT-TATGTGCCCTTCTCCAA--CGA--GGCGTGGT--GCAGCCCCTTCGAG--CCCGCAGTACTACCTGG--GAACCATG	1	1e-05	14GC22TT44TCAC59GG74AG91TC
GAATGGCACAGAAGGCCCTAACTTCTACGTGCCCTTCTCC-------------------------------AGTACCCACAGTACTACCTGGCTGAGCCATG	1	1e-05	0
GAATGGCACAGAAGGCCCTAACTTCTACGTGCCCTTCTCCAATGCGATGGGTGTGGCACGCAGCCCCTTCGAGTACCCACAGTACTACCTGGCTGAGCCACG	1	1e-05	0
GAATGGCACAGAAGGCCTTAACTTCTACGTGCCCTTCTCCAA--CGATGGGTGTGGTACGCAGCCCCTTCGAGTACCCACAGTACTACCTGGCTGAGCCATG	1	1e-05	0
GAATGGCACAGAAGGCCCTAACTTCTACGTGCCCTTCTCCAATGCGATGGGTGTGGTACGCAGCCCCTTCGAGTACCCACAGTACTACCTGGCTGAGCCATG	1	1e-05	44GGCGGCCTCAGTGAGCGAGCGAGCGCGCAGAGAGGGAGTGGCCAACTCCA
GAATGGCACAGAAGGCCCTAACTTCTACGTGCCCTTCTCCAAT--GATGGGTGTGGTACGCAGCCCCTTCGAGTACCCACAGTACTACCTGGCTGAGCCATG	1	1e-05	45G
GAATGGCACAGAAGGCCCTAACTTCTACGTTCCCTTCTCCAATGCGACGGGTGAGGTACGCAGCCCCTTCGAGTACCCACAGTACTACCTGGCTGAGCCATG	1	1e-05	0
GAATGGCACAGAAGGCCCTAACTTCTACGTGCCCTTCTCCAATGCGATGGGTGTGGTACGCAGCCCCTTCGAGTACCCACAGTACTACCTGGCTGAGCCATG	1	1e-05	39AAATGGCTTTGCTCGGGCGGCCTCAGAGAGCGAGCGAGCGCG83GAGAGGG91G93G
GAATGGCACAGAAGGCCCTAACTTCTACGTGCCCTTCTCCAATGCGATGGGTGTGGTACGCAGCCCCTTCGAGTACCCACAGTACTACCTGGCTGAGCCATG	1	1e-05	48G
GAATGGCACAGAAGGCCCTAACTTCTACGTGCCCTTCTCCAATG-GATGGGTGTGGTACGCAGCCCCTTCGAGTACCCACAGTACTACCTGGCTGAGCCATG	1	1e-05	43GGGGTG
GAATGGCACAGAAGGCCCTAACTTCTACGTGCCCTTCTC-------ATGGGTGTGGTACGCAGCCCCTTCGAGTACCCACAGTACTACCTGGCTGAGCCATG	1	1e-05	0
GAATGGCACAGAAGGCCCTAACTTCTACGTGCCCTTCTCCAATGGGATGGGTGTGGTACGCGGCCCCTTCGAGTACCCACAGTACTACCTGGCTGAGCCATG	1	1e-05	0
GAATGGCACAGAAGGCCCTAACTTCTACGTGCCCTTCTCCAATGCGATGGGTGTGGTACGCAGCCCCTTCGAGTACCCACAGTACTACCTGGCTGAGCCATG	1	1e-05	44TCCCTCTCTGCGCGCTCGCTCGCTCACTGAGGCCGGGCGACCAAA
GAATGGCACAGAAGGCCCTAACTTCTACGTGCCCTTCTCCAATGCGACGGGTTTGGTACGCAGCCCCTTCGAGTACCCACAGTACTACCTGGCTGAGCCTTG	1	1e-05	0
GAATGGCACAGAAGGCCCTAACTTCTACGTGCCCTTCTCCAATG-GATGGGTGTGGTACGCAGCCCCTTCGAGTACCCATAGTACTACCTGGCTGAGCCATG	1	1e-05	0
GAATGGCACAGAAGGCCCTAACTTCTACGTGCCCTTCTCCAAT--GATGGATGTGGTACGCAGCCCCTTCGAGTACCCACAGTACTACCTGGCTGAGCCATG	1	1e-05	0
GACTGGCACAGAAGGCCCTAACTTCTACGTGCCCTTCTCCAATGCGCTGGGTGTGGTACGCAGCCCCTTCGAGTACCCACAGTACTACCTGGCTGAGCCATG	1	1e-05	0
#NAME?	1	1e-05	0
GAATGGCACAGAAGGCCCTAACTTCTACGTGCCCTTCTCCAATGCGAT-GGTGTGGTACTCAGCCCCTTCGAGTACCCACAGTACTACCTGGCTGAGCCATG	1	1e-05	47C
GAATGGCACAGAAGGCCCTAACTTCTACGTGCCCTTCTCCAATGCGATGGATGTGGTACTCAGCCCCTTCGAGTACCCACAGTACTACCTGGCTGAGCCATG	1	1e-05	0
GAATGGCACAGAAGGCCCCAACTTTTACGTGCCCTTCTCCAATGTGACGGGCGTGGTACGCAGCCCCTTCGAGCACCCGCAGTACTACCTGGCTGAGCCATG	1	1e-05	0
GAATTGCACAGAACGCCCTAACTTCTACGTGCCCTTCTCCAATGCGATGCGTGTGGTACGCAGCCCCTTCAAGTACCCACAGTACTACCTGGCTGAGCCATG	1	1e-05	0
GAATGGCACAGAAGGCCCTAACTTCTACGTGCCCTTCTCCAATGCGATGGGTGTGGTACGCAGCCCCTTCGAGTACCCACAGTACTACCTGGCTGAGCCATG	1	1e-05	55GTACGCAGCCC
GAATGGCACAGAAGGCCCTAACTTCTACGTGCCCTTCTCCAA--CGATGGGTGTGGTACGCAGCCCCTTCGAGTACCCACAGTACCACCTGGCTGAGCCATG	1	1e-05	0
GAATGGCACAGAAGGCCCTAACTTCTACGTGCCCTTCTCCAATGCGATGGGTGTGGTACGCAGCCCCTTCGAGTACCCACAGTACTACCTGGCTGAGCCATG	1	1e-05	42GGGTCGCCCGGCCTCAGTGAGCGAGCGAGCGCGCAGAGAGGGAG88GCCAA
GAATGGCACAGAAGGCCCTAACTTCTACGTGCCCTTCTC-----CGATGGGTGTGGCACGCAGCCCCTTCGAGTACCCACAGTACTACCTGGCTGGGCCATG	1	1e-05	0
GAATGTCACAGAAGGCCCTAACTTCTACGTTCCCTTCTCCAATGCGATGGGTGTGGTACGCAGCCCCTTCGAGTACCCACAGTACTACCTGGCTGAGCCATG	1	1e-05	0
GAATGGCACAGAAGGCCCTAACTTCTACGTGCCCTTCTCCAATGCGTTGGGTGTGGTACGCAGCCCCTTCGAGTTCCCACAGTACTACCTGGCTGAGCCATG	1	1e-05	0
GAATGGCACAGAAGGCCCTAACTTCTACGTGCCCTTCTCCAATGCGATGGGTGTGGTAAGCAGCCCCTCCGAGTACCCACAGTACTACCTGGCTGAGCCATG	1	1e-05	0
GAATGGCACAGAAGGCCCTAACTTCTACGTGCCCTTCTCCAATGCGATGGGTGTGGTACGCAGCCCCTTCGAGTACCCACAGTACTACCTGGCTGGGCCATG	1	1e-05	44GTCGCCCGGCCTCAGTGAGCGAGCGAGCGCGCAGAGAGGGAGTGGCCAA
GAATGGCACAGAAGGCCCTAACTTCTACGTGCCCTTCTCCAACGCGACGGGTGTGGTACGCAGCCCTTTCGAGTACCCACAGTACTACCTGGCTGAGCCATG	1	1e-05	0
GAATGGAACAGACGGCCCTAACTTTTACGTTCCCTTCTCCAATGCGATGGGTGAGGTACGCAGCCCCTTCGAGTACCCACAGTACTACCTGGCTGGGCCATG	1	1e-05	0
GAATGGCACAGAAGGCCCTAACTTCTACGTGCCCTTCTCCAATGCGATGGGTGTGGTACGCAGCCCCTTCGAGTACCCACAGTACTACCTGGCTGAGCCATG	1	1e-05	44TGGTCGCCCGGCCTCAGTGAGCGAGCGAGCGCGCAGAGAGGGAGTGGCCA
GAATGGCACAGAAGGCCCTAACTTCTACGTGCCCTTCTCCAA--CGATGGGTGTGGTACGCAGCCCCTTCGAGTACCCACAGTACTACCTGGCTGATCCATG	1	1e-05	0
GAATTGCACAGAAGGCCCTAACTTCTACGTGCCCTTCTCCAATG-GATGGGTGTGGTACGCAGCCCCTTCGAGTACCCACAGTACTACCTGGCTGAGCCATG	1	1e-05	0
GAATGGCACAGAAGGCCCTAACTTCTACGTGCCCTTCT--------------------------CCCTTCGAGTACCCACAGTACTACCTGGCTGAGCCATG	1	1e-05	0
GAATGGCACAGAAGGCCCTAACTTCTAAGTGCCCTTCTCCAATGCGACGGGTGTGGTACGCAGTCCCTTCGAGTACCCACAGTACTACCTGGCTGAGCCATG	1	1e-05	0
GAATGGCACAGAAGGCCCTAACTTCTACGTGCCCTTCTCCAATGCGATGGGTGTGGTACGCAGCCCCTTCGAGTACCCACAGTACTACCTGGCTGAGCCATG	1	1e-05	36TGGTCGCCCGGGCGGC55AGCGAGCGAGCGAGCGCG75GAGAGGG83G86GC
GAATGGCACAGAAGGCCCTAACTTCTACGTGCCCTTCTCCAATG-GATGGGTGTGGTACGCAGCCCCTTCGAGTACCCACAGTACTACCAGGCTGAGCCATG	1	1e-05	0
GAATGGCACAGAAGGCCCTAACTTCTACGCGCCCTTCTCCAATGCGATGGGTGTGGTACGCAGCCCCTTCGAGTACCCACAGTACTACCTGGCTGATCCATG	1	1e-05	0
GAATGGCACAGAAGGCCCTAACTTCTACGTGCCCTTCTCCAATGCGATGGGTGTGGTACGCAGCCCCTTCGAGTACCCACAGTACTACCTGGCTGAGCCATG	1	1e-05	44TGGCCACTCCCTCTCTGCGCGCTCGCTCGCTCACTGAGGCCGGGCGA
GAATGGCACATAAGGCCCTAACTTCTACGTGCCCTTCTCCAATGTGATGGGTGTGGTACGCAGCCCCTTCGAGTACCCACAGTACTACCTGGCTGAGCCATG	1	1e-05	0
GAACGGCACAG-AGGCCC-AA-TT-TA--TGCCCTTCTCCAA--CGA--GGCGTGGT--GCAGCCCCTTCGAG--CCCGCAGTACTACCTGGC-GA-CCATG	1	1e-05	14GC22TT29TA44TCAC59GG74AG94GA
GAATGGCACAGAAGGCCCTAACTTCTACGTGCCCTTCTCCAATGCGATGGGTGTGGCACGCAGTCCCTTCTAGTACCCACAGTACTACCTGGCTGAGCCATG	1	1e-05	0
GAATGGCACAGAAGGCCCTAACTTCTGCGTGCCCTTCTCCAATGCGATGGGTGTGGTACGCAGCCCCTTCGAGTACCCACAGTACTACCTGGCTGAGACATG	1	1e-05	0
GAATGGCACAGAAGTCCCTAACTTCTACGTGCCCTTCTCCAAT-CGATGGGTGTGGTACGCAGCCCCTTCGAGTACCCACAGTACTACCTGGCTGAGCCATG	1	1e-05	0
GAATGGCACAGAAGGCCCTAACTTCTACGTGCCCTTCTCCAAT------GGTGTGGTACGCAGCTCCTTCGAGTACCCACAGTACTACCTGGCTGAGCCATG	1	1e-05	0
GAATGTCACAGAAGGCCCTAACTTCTACGTGCCCTCCTCCAATGCGATGGGTGTGGTACGCAGCCCCTTCGAGTACCCACAGTACTACCTGGCTGAGCCATG	1	1e-05	0
GAATGGCACAGAAGGCCCTAA-----------------------CGATGGGTGTGGTACGCAGCCCCTTCGAGTACCCACAGTACTACCTGGCTGAGCCATG	1	1e-05	0
GAATGGCACAGAAGGCCCTAACTTCTACGTGCCCTTCTCCAATGCGATGGGTGCGGTACGCAGCCCCTTCGAGTACCCACAGTACTACCTGGCTGCGCCATG	1	1e-05	0
GAATGGCACAGAAGGCCCTAACTTCTACGTGCCCTTCTCCAATGCGATGGGTGTGGTACGCAGCCCCTTCGAGTACCCACAGTACTACCTGGCTGAGCCATG	1	1e-05	44TGGCCACTCCCTCTCTGCGCGCTCGCTCGCTCACTGAGCCCGCCCGGGCCCT
GAATGGCACAGAAGGCCCTAACTTCTACGTGCCCTTCTCCAAT--GATGGGTGTGGTACGCAGCCCCTTCGAGTACCCACAGTACTACCTGGCTGAGCTATG	1	1e-05	0
GAATGGCACAGAAGGCCCTAACTTCTACGTGCCCTTCTCCAACGCGATGGGTGTGGTACGCAGCCCCTTCGAGTACCCACAGTACTACCTGGCTGAGCCTTG	1	1e-05	0
GAACGGCACAG-AGGCCC-AA-TT-TATGTGCCCTTCTCCAA--CGA--GGCGTGGTACGCAGCCCCTTCGAGTACCCACAGTACTACCTGGCTGAGACATG	1	1e-05	14GC22TT44TCAC
GAATGGCACAGAAGGCCCTAACTTCTACGTGCCCTTCTCCAAT--GATGGGTGTGGTATGCAGCCCCTTCGAGTACCCACAGTACTACCTGGCTGAGCCATG	1	1e-05	0
GAATGGCACAGAAGGCCCTAACCTCTACGTGCCCTTCTCCAATGCGATGGGTGTGGTACGCAGCCCCTTCGAGTA-CCACAGTACTACCTGGCTGAGCCATG	1	1e-05	0
GAATGGAACAGAAGGCCCTAACTTCTACGGGCCCTTCTCTAATGCGATGGGAGTGGTACGCA-CCCCTTCGAGTACCCACAGTACTACCTGGCTGAGCCATG	1	1e-05	60C
GAATGGCACAGAAGGCCTTAACTTCTACGTGCCCTTCTCCATTGCGATGGGTGTGGTACGCAGCCCCTTCGAGTACCCACAGTACTACCTGGCTGAGCAATG	1	1e-05	0
GAATGGCACAGAAGGCCCTAACTTCTACGTG---------------------------CGCAGCCCCTTCGAGTACCCACAGTACTACCTGGCTGAGCCATG	1	1e-05	0
GAATGGCACAAAAGGCCCTAACTTCTACGTGCCCTTCTCCA-----ATGGGTGTGGTACGCAGCCCCTTCGAGTACCCACAGTACTACCTGGCTGAGCCATG	1	1e-05	0
GAACGGCACAG-AGGCCC-AA-TT-TATGTGCCCTTCTCTAA--CGA--GGCGTGGT--GCAGCCCCTTCGAG--CCCGCAGTACTACCTGGC-GA-CCATG	1	1e-05	14GC22TT44TCAC59GG74AG94GA
GAATGGCACAGAAGGCCCTAACTTCTACGTGCCCTTCTCCAATGCGATGGGTGTGGTACGCAGCCCCTTCGAGTACCCACAGTACTACCTGGCTAAGCCATG	1	1e-05	43GC
GAATGGCACAGAAGGCCCTAACTTCTACGTGCCCTTCTCAAATGCGATGGGCGTGGTACGCAGCCACTTCGAGTACCCACAGTACTACCTGGCTGAGCCATG	1	1e-05	0
GAATGGCACAGAAGGCCCTAACTTCTACGTGCCCTTCTCCAATGCGATGGGTGTGGTACGCAGCCCCTTCGAGTACCCACAGTACTACCTGGCTGAGCCATG	1	1e-05	44GGGCGGCCTCAGTGAGCGAGCGAGCGCGCAGAGAGGGAGTGGCCA
GAATGGCACAGAAGGCCCTAACTTCTACGTGCCCTTC---------ATGGGTGTGGTACGCAGCCCCTTCGAGTACCCACAGTACTACCTGGCTGAGCCATG	1	1e-05	0
GAATGGCACAGAAGGCCCTAACTTCTACGTGCCCTTCTCCAATG-GATGGGTGTGGTACGCAGCCCCTCCGAGTACCCACAGTACTACCTGGCTGAGCCATG	1	1e-05	0
GAATGGCACAGAAGGCCCTAACTTCTACGAGCCCTTCTCCAATGCGATGGGTGTGGTACGCAGCCCCTTCGAGTACCCACAGTACTACCTGGCTGAGCCATG	1	1e-05	43G
GAATGGCACAGAAGGCCCTAACTTCTACGTGCCCTTCTCCAATGCGATGGGTGTGGTACGCAGCCCCTTCGAGTACCCACAGTACTACCTGGCTGAGCCATG	1	1e-05	44GTCGCCCGGCCTCAGTGAGCGAGCGAGCGCGCAGA
GAATGGCACAGAAGGCCCTAACTTCTACGTGCCCTTCT------CGATGGGTGTGGTACGCAGCCCCTTCGAGTACCCACAGTACTTCCTGGCTGAGCCATG	1	1e-05	0
GAATGGCACAGAAGTCCCTAACTTCTACGTGCCCTTCTCCAAT------GGTGTGGTACGCAGCCCCTTCGAGTACCCACAGTACTACCTGGCTGAGCCATG	1	1e-05	0
GAATGGCACCGAAGGCCCTAACTTCTACGTGCCCTTCTCCAATGCGATGGGTGTGGTACGCAGCCCCTACGAGTACCCACAGTACTACCTGGCTGAGCCATG	1	1e-05	0
GAATGGCACAGAAGGCCCTAACTTCTACGTGCCCTTCTCCAATGCGATGGGTGTGGTACGCAGCCCCTTCGAGTACCCACAGTACTACCTGGCTGAGCCGTG	1	1e-05	44GTCGCCCGACGCCCGGGCTTTGCCCGGGCGGCCTCAGTGAGCGAGCGAGCGCGCAGAGAGGGA
GAATGGCACAGAAGGCCCTAACTTCTACGTGCCCTTCTCCAATGCGATGGGTGTGGTACGCACCCCCTTCGAGTACCCACAGTACTACCTGGCTGCGCCATG	1	1e-05	0
GAATGGCACAGAAGGCCCTAACTTCTACGTGCCCTTCTCCAATGCGATGGGTGTGGTACGCAGCCCCTTCGAGTACCCACAGTACTACCTGGTTGAGCCATG	1	1e-05	42TGCGATGGGTC
GAATGGCACAGAAGGCCCTAACTTCTACGTGCCCTTCTCCAATGCGATGGGTGTGGTACGCAGCCCCTTCGAGTACCC--AGTACTACCTGGC-GA-CCATG	1	1e-05	75G78G94GA
GAATGGCACAGAAGGCCCTAACTTCTACGTGCCCTTCTCCAATGCGATGGGTGTGGTATGCAGCCCCTTCGAGTACCTACAGTACTACCTGGCTGAGCCATG	1	1e-05	0
GAATGGCACAGAAGGCCCTAACTTCTACGTGCCCTTCTCCAATG-GATGGGGGTGGTACGCAGCCCCTTCGAGTACCCACAGTACTACCTGGCTGAGCCTTG	1	1e-05	0
GAATGGCACAGAAGGCCCTAACTTCTACGTGCCCTTCTCCAATGCGATGGGTGTGGTACGCAGCCCCTTCGAGTACCCACAGTACTACCTGGCTGAGCCATG	1	1e-05	43GAA
GAATGGCACAAAAGGCCCTAACTTCTACGTGCCCTTCTCCAATGCGAGGGGTGTGGTACGCAGCCCCTTCGAGTACCCACAGTACTACCTGGCTGAGCCATG	1	1e-05	0
GAATGGCACAGAAGGCCCTAACTTCTACATGCCCTTCTCCA---CGATGGGTGTGGTACGCAGCCCCTTCGAGTACCCACAGTACTACCTGGCTGAGCCATG	1	1e-05	0
GAACGGCACAGAAGGCCCTAACTTCTACGTGCCCTTCTCCAAT--GATGGGTGTGGCACGCAGCCCCTTCGAGTACCCACAGTACTACCTGGCTGAGCCATG	1	1e-05	0
GAATTGCACAGAAGGCCCTAACTTCTACGTGCCCTTCTCCAATGCGATGGGTGTGGTACGCAGCCCCTTCGAGTACCCACAGTACTACCTGGCTGAGCCATG	1	1e-05	42GCCCGGGCGGCCTCAGTGAGCGAGCGAGCGCGCAGAGAGGGAG87GCCAACT
GAATGGCACAGAAGGCCCTAACTTCTACGTGCCCTTCTCCAATGCGATGGGTGTGGTACGCAGCCCCTTAGAGTAACCACAGTACTACCTGGCTGAGCCATG	1	1e-05	0
GAATGGCACAGAAGGCCCTAACTTCTACGTGCCCTTCTCCAATGCGATGGGTGTGGTACGCAGCCCCTTCGGGTACCCACAGTACTACCTGGCTGAGCCCTG	1	1e-05	0
GAATGGCACAGAAGGCCCTAACTTCTACGCGCCCTTCTCCAAT-CGATGGGTGTGGTACGCAGCCCCTTCGAGTACCCACAGTACTACCTGGCTGGGCCATG	1	1e-05	0
GAATGGCACAGAAGGCCCTAACTTCTACGTGCCCTTCTCCAATGCGATGGGTGTGGTACGCAGCCCCTTCGAGTACCCACAGTAATACCTGGCTGAGCCATG	1	1e-05	44CTTTGCCCGGGCGGCCTCAGTGAGCGAGCGATCGCGCAGAGAGGGAGTGGCCAACTCCATCACTAGGGGTTCCTGCGGCCGCAAAAATCTCGCCAACAAGTTGACGAGATAA
GAATGGCCCAGAAGGCCCTAACTTCTACGTGCCCTTCTCCAAT--GATGGGTGTGGCACGCAGCCCCTTCGAGTACCCACAGTACTACCTGGCTGAGCCATG	1	1e-05	0
#NAME?	1	1e-05	32TAT
GAATGGCACAGTAGGCCCTAACTTCTACGTGCCCTTCTCCAATGCGATGGGTGTGGTACGCCGCCCCTTCGAGTACCCACAGTACTACCTGGCTGAGCCATG	1	1e-05	0
GAATGGCACAGAAGGCCCTAACTTCTACGTGCCCTTCTCCAATGCGATGGGTGTGGTACGCAGCCCCTTCGAGTACCCACAGTACTACCTAGCTGAGCCATG	1	1e-05	44C
GAATGGCACAGAAGGCCCTAACTTCTACGTGCCCTTCTCCAATGCGATGTGTGTGGTACGCAGCCCCTTCGAGTACCCACAGTACTACCTGGCTGAGCCATT	1	1e-05	0
GAATGGCACAGAAGGCCCTAACTTCTACGTGCCCTTCTCCAATG-GATGGGTGTGGTACGCAGCCCCTTCAAGTACCCACAGTACTACCTGGCTGAGCCATG	1	1e-05	0
GAATGGCACAGAAGGCCCTAACTTCTACGTGCCCTTCTCCAATGCGATGGGTGTGGTACGCGGCCCCTTCGAGTACCCACAGTACTACCTGGCTGAGCCATG	1	1e-05	44AAAGCCCGGGCGTCGGGCGACCTTTGGTCGCCCGGCCTCAGTGAGCGAGCGAGCGCGCAGAGAGGGAGTGGC
GAATGGCACAGAAGGCCCTAACTTCTACGTGCCCTTCTCCAATGCGATGGGTGTGGTACGCAGCCCCTTCGAGTACCCACAGTACTACCTGGCTGAGCCATG	1	1e-05	44AAAGCCCGGGCGTCGGGCGACCTTTGGTCGCCCGGCCTCAGTGAGCGAGCGAGCGCGCAGAGAGGGAGTGGC
GAATGGCACAGAAGGCCCTAACTTCTACGTGCCCTTCTCCAATGCGATGGGTGTGGTACGCAGCCCCTTCGAGTACCCACAGTACTACCTGGCTGAGCCATG	1	1e-05	43GGGCGAGATTTTTGCGGCCGCAGGAACCCCTAGTGATGGAGTTGGCCACTCCCTCTCTGCGCGCTCGCGCGCTCACTGAGGCCGGGC
GAATGGCACAGAAGGACCTAACTTCTACGTGCACTTCTCCAATGCGATGGGTGTGGTACGCAGCCCCTTCGAGTACCCACAGTACTACCTGGCTGAGCCGTG	1	1e-05	0
GAATGGCACAGAAGGCCCTAACTTCTACGTGCCCTTCTCCAATGCGATGGGCGTGGTACGCAGCCCCTTCGAGTACCCACAGTACTACCTGGCTGAGCCATG	1	1e-05	44TTGGCCACTCCCTCTCTGCGCGCTCGCT74CTC78C81A84CCGCC
GAATGGCACAGAAGGCCCTAACTTCTACGTGCCCTTCTCCAATGCGATGGGTGTGGTACGCAGCCCCTTCGAGTACCCACAGTACTACCTGGCTGAGCCATG	1	1e-05	42CCTTTGCCCGGGCGGCCTCAGTGAGCGAGCGAGCGCGCAGAGAGGGAGTGGCCAACTCCATCAC
GAATGGCACAGAAGGCCCTAACTTCTACGTGCCCTTCTCCAATGCGATGGGTGTGGTACGCAGCCCCTTCGAGTACCCACAGTACTACCTGGCTTATCCATG	1	1e-05	0
GAATGGCACAGAAGGCCCTAACTTCTACGTGCCCTTCTCCAATGCGATGGGTGTGGTACGCAGCCCCTTCGAGTACCCACAGTACTACCTGGCTGAGCCATG	1	1e-05	44CGGCCTCAGTGAGCGAGCGAGCGCGCAGAGAGGGAGTGGCCA
GAATGGCACAGAAGGCCCTAACTTCTACGTGCCCTTCTCCAATGCGATGGGTGTGGTACGCAGCCCCTTCGAGTACCCACAGTACTACCTGGCTGAGCCATG	1	1e-05	44TGGTCGCCCGGCCTCAGTGAGCGAGCGAGCGCGCAGAGAGGGAGTGGCCAA
GAATGGCACAGAAGGCCCTAACTTCTACGTGCCCTTCTCCAATGCGATGGGTGTGGTACGCAGCCCCTTCGAGTACCCACAGTCCTACCTGGCTGAGCCATG	1	1e-05	0
GAATGGCACAGAAGGCCCTAACTTCTACGTGCCCTTCTCCAAT---ATGGGTGTGGTACGCAGCCCCTTCGAGTACCCACAATACTACCTGGCTGAGCCATG	1	1e-05	0
GAACGGCAAAGAAGGCCC-AACCTCTACGTGCCCTTCTCAAATGCGATGGGTGTGGTACGCAGCCCCTTCGAGTACCCACAGTACTCCCTGGCTGCGCCATG	1	1e-05	16G
GAATGGCACAGAAGGCCCTAACTTCTACGTGCCCTTCTCCAATGCGATGGGTGTGGTACGCAGCCCCTTCGAGTACCCACAGTACTACCTGGCTGAGCCATG	1	1e-05	44GTCGCCCGGCCTCAGTGAGCGAGCGAGCGCGCAGAGAGGGAGTGGCCAACTCCATCAC
GAATGGCACAGAAGGCCCTAACTTCTACGTGCCCTTCTCCAATGCGATGGGTGTGGTACGCAGCCCCTTCGAGTACCCACTGTACTACCTGGCTTAGCCATG	1	1e-05	0
GAATGTCACAGAAGGCCCTAACTTCTACGTGCCCTTCTCCAATGCGATGGGAGTGGTACGCAGCCCCTCCGAGTACCCACAGTACTACCTGGCTGGGCCATG	1	1e-05	0
GAATGGCACAGAGGGCCCTAACTTCTACGTGCCCTTCTCCAATGCGACGGGTGTGGTACGCAGCCCCTTCGAGTACCCACAGTACTACCTGGCTGAGCCATG	1	1e-05	0
GAATGGCACAGAAGGCCCTAACTTCTACGTGCCCTTCTCCAATGCGATGGGTGTTGTACGCAGCCCCCTCGAGTACCCACAGTACTACCTGGCTGAGCCATG	1	1e-05	0
GAATGGCACAGAAGGCCCTAACTTCTACGTGCCCTTCTCCAATGCGATGGGTGTGGTACGCAGCCCCTTCGGGTACCCACAGTACTACCTGGCTGAGCCTTG	1	1e-05	0
GAATGGCACAGAATGTCCTAACTTCTACGTGCCCTTCTCCAATGCGATGGGTGTGGTACGCAGCCCCTTCGAGTACCCACAGTACTACCTGGCTGAGCCATG	1	1e-05	0
GAATGGCACAGATGGCCCTAACTTCTACGTGCCCTTCT---ATGCGATGGGTGTGGTACGCAGCCCCTTCGAGTACCCACAGTACTACCTGGCTGAGCCATG	1	1e-05	32CCT
GACTGGCACAGAAGGCCCTAACTTCTACGAGCCCTTCTCCAATGCGATGGGTGTGGTACGCAGCCCCTTCGAGTACCCACAGTTCTACCTGGCTGAGCCATG	1	1e-05	0
GAATGGCACAGAAGGCCCTAACTTCTACGTGCCCTTCTCCAATGCGATGGGTGTGGTACGCAGCCCCTTCGAGTACCCACAGTACTACCTGGCTGAGCCATG	1	1e-05	44TCCCTCTCTGCGCGCTCGCTCGCTCACTGAGGCCGGGCGACC
GAATGGCACAGAAGGCCCTAACTTCTACGTGCCCTTCTCCAATGCGATGGGAGTGGTACGCAGCCCCTTCGAGTACCCACAGTACTACCTGGCTGAGCCATG	1	1e-05	43GGTCGG52GCCTC58G60GAGCGAGCGAGCGCGCAGAGA
GAACGGCACAG-AGGCCC-AA-TT-TATGTGCCCTTCTCCAA--CGA--GGTGTGGT--GCAGTCCCTTCGAG--CCCGCAGTACTACCTGGC-GA-CCATG	1	1e-05	14GC22TT44TCAC59GG74AG94GA
GAACGGCACAGAAGGCCCTAACTTCTACGTGCCCTTCTCCAATG-GATGGGTGTGGTACGCAGCCCCTTCGAGTACCCACAGTACTACCTGGCTGAGCCATG	1	1e-05	0
GAACGGCACAG-AGGCCC-AA-TT-TATGTGCCCTTCTCCAA--CGA--GGCGTGGT--GCAGCCCCTTCGAG--CCCGCAGTACTGCCTGGC-GA-CCATG	1	1e-05	14GC22TT44TCAC59GG74AG94GA
GAATGGCACAGAAGGCCCTAACTTCTACGTGCCCTTCTCCAATGCGATGGGTGTGGTACGCAGCCCCTTCGAGTACCCACAGTACTACCTGGCTGAGCCATG	1	1e-05	44TGGTCGCCCGGCCTCAGTGAGCGAGCGAGCGCGCAGA
GAATGGCACAGAAGGCCCTAACTTCTACGTGCCCTTCTCCAATGCGATGGGTGTGGTACGCAGCCCCTTCGAGTACCCACAGTACTACCTGGCTGGGCCATG	1	1e-05	41GGTCGCCCGGCCTCAGTGAGCGAGCGAGCGCGCAGAGAGGGAGTGGCCAACTCC97CACTAGGGGTTCCTGCGGCCGGTCGC
GAATGGCACAGAAGGCCCTAACTTCTACGTGCCCTTCTCCAATGCGATGGGTGTGGTACGCAGCCCCTTCGAGTACCCACAGTACTACCTGGCTGAGCCATG	1	1e-05	42TGCTATCTTGGTTATTTATAGCTTTTGGGCTAGCTAAGTAAGGATGAGAGATATGTAG
GAATGGCACAGAAGGCCCTAACTTCTACGTGCCCTTCTCCAATGCGATGGGTGTGGTACGCAGCCCCTTCGAGTACCCACAGTACTACCTGGCTGAGCCATG	1	1e-05	43GTTGGCCACTCCCTCTCTGCGCGCTCGCTCGCTCACTGAGGCCGCCCGGGCAAAGCCCGGGCGTCGGGCGACCTTTG
GATTGGCACAGAAGGCCCTAACTTTTACGTGCCCTTCTCCAATGCGATGGGTGTGGTACGCAGCCCCTTCGAGTACCTACAGTACTACCTGGCTGAGCCATG	1	1e-05	0
GAATGGCACAGAAGGCCCTAACTTCTACGTGCCCTTCTCCAATGCGATGGGTGTGGTACGCAGCCCCTTCGAGTACCCACAGTACTACCTGGCTGAGCCATG	1	1e-05	44TGGCAACTCCCTCTCTGCGCGCTCGCT73CTC77C80AGGCCGCCCGGGCA
GAACGGCACAGAAGGCCCTAACTTCTACGTGCCCTTCTCCAATGCGATGGGTGTGGTACGCAGCCCCTTCGAGTACCCACAGTACTACCTGACTGAGCCATG	1	1e-05	0
GAATGGCACAGAAGGCCCTAACTTCTACGTGCCCTTCTCCAATGCGATGGGTGTGGTACGCAGCCCCTTCGAGTACCCACAGTACTACCTGGCTGAGCCATG	1	1e-05	44TGCGCGCTCGCTCGCTCACTGAGGCCGCCCGGGCAAAGCCCGGGCGTCGGGCGACCTTT
GAATGGCACAGAAGGCCCTAACTTCTACGTGCCCTTCTCCAA-GCGATGGGTGTGGTACGCAGTCCCTTCGAGTACCCACAGTACTACCTGGCTGAGCCATG	1	1e-05	0
GAATGGCACAGAAGGCCCTAACTTCTACGTGCCCTTCTCCAATGGG--GGGTGTGGTACGCAGCCCCTTCGAGTACCCACAGTACTACCTGGCTGAGCCATG	1	1e-05	0
GAATGGCACAGAAGGCCCT-ACTTCTACGTGCCCTTCTCCAATGCGATGGGTGTGGTACGCAGCCCCTTCGAGTACCCACAGTACTACCTGGCTGAGCCATG	1	1e-05	15C
GAATGGCACAGAAGGCCCTAACTTCTACGTGCCCATCTCCAATG-GATGGGTGTGGTACGCAGCCCCTTCGAGCACCCACAGTACTACCTGGCTGAGCCATG	1	1e-05	0
GAATGGCACAGAAGGCCCTAACTTCTACGTGCCCTTCTCCAATGCGATGGGTGTGGTACGCAGCCCCTTCGAGTACCCACAGTACTACCTGGCTGAGCCATG	1	1e-05	44CGCC
GAATGGCACAGAAGGCCCTAACTTCTACGTGCCCTTCTCCAATG----------GGTACGCAGCCCCTTCGAGTACCC--AGTACTACCTGGC-GA-CCATG	1	1e-05	65G68G84GA
GAATGGCACAGAAGGCCCTAACTTCTACGTGCCCTTCTCCAAT--GA----TGTGGTACGCAGCCCCTTCGAGTACCCACAGTACTACCTGGCTGAGCCATG	1	1e-05	0
GAATGGCACAGAAGGCCCTAACTTCTACGTGCCCTTCTCCAATGCGATGGGTGTGGTACGCAGCCCCTTCGAGTACCCACAGTACTACCTGGCTGAGCCATG	1	1e-05	38TTGCCCGGGCGG52TCAGTGAGCGAGCGAGCGCGCAGAG78GGG82G85GCCAA
GAATGGCACAGAAGGCCCTAACTTCTACGTGCCCTTCTCCAATGCGATGGGTGTGGTACGCAGCCCCTTCGAGTACCCACAGTACTACCTGGCTGAGCCTTG	1	1e-05	36TGGTCGCCCGGC51AGTGAGCGAGCGAGCGCG71GAGAGGG79G82GCT
GAATGGCACAGAAGGCCCTAACTTCTACGTGCCCTTCTTCAATGCGATGGGTGTGGTACGCAGCCCCTTCGAGTACCCACAGTACTACCTGGCTGAGCCATG	1	1e-05	43G
GAATGGCACAGAAGGCCCTAACTTCTACGTGCCCTTCTCCAATGCGATGGGTGTGGTACGCAGCCCCTTCGAGTACCCACAGTACTACCTGGCTGAGCCATG	1	1e-05	47TGGGTG
GAATGGCACAGAAGGCCCTAACTTCTACGTGCCCTTCTCCAATGTGATGGGTGTGGTACGCAGCCCCTTCGAGTACCCACAGTACTACCTGGCTGAGCCATG	1	1e-05	44TTA49TT
GAATGGCCCAGAAGGCCCTAACTTCTACGTGCCCTTCTCCAATGCGATGGGTGTGGTACGCAGCCCCTTCGAGTACCCACTGTACTACCTGGCTGAGCCATG	1	1e-05	0
GAATGGCACAGAAGGCCCTAACTTCTACGTGCCCTTCTCCAATGCGATGGGTGTGGTACGCAGCCCCTTCGAGTACCCACAGTACTACCTGGCTGAGCCATG	1	1e-05	38GCTTTGGTCGCCCGG55TCAGTGAGCGAGCGAGCGCGCAGAG81GGG85G88GCCAACTC
GAATGGCACAGAAGGCCCTAACTTCTACGTGCCCTTCTCCAATGCGATGGGTGTGGTACGCAGCCCCTTCGGGTACCCACAGTACTACCTGGCTGAGCCATG	1	1e-05	41GCCCGGGCGGCCTCAGTGAGCGAGCGAGCGCGCAGAGAGGG83G86GCC
GAATGGCACAGAAGGCCCTAACTTCTACGTGCCCTTCTCCGATGCGATGGGTGTGGTACGCAGCCCCTTCGAGTACCCACAGTACTACCTGGCTGAGCCATG	1	1e-05	43G
GAATGGCACAGAAGGCCCTAACTTCTACGTGCCCTTCTCCAATGCGATGGGTGTGCTACGCAGCCCCTTCGAGTACCCACAGTACTACCTGGCTGAGCCATG	1	1e-05	0
GAATAGCACAGAAGGCCCTAACTTCTACGTGCCCTTCTCCAATGCGATGGGTGTGGTACGCAGCCCCTTCGAGTACCCACAGTACTACCTGGCTGAGCCATG	1	1e-05	44T
GAATGTCACAGAAGGCCCTATCTTCTACGTGCCCCTCTCCAATGCGATGGGTGTGGTACGCAGCCCCTTCGAGTACCCACAGTACTACCTGGCTGAGCCATG	1	1e-05	0
GAATGGCACAGAAGGCCCTAACTTCTACGTGCCCTTCTCCAATGCGATGGGTGTGGTACGCAGCCCCTTCGAGTTCCCACAGTACTACCTGGCTGAGCCATG	1	1e-05	43G
GAATGGCACAGAAGGCCCTAACTTCTACGTGCCCTTCTCCAAT-CGATGGGTGTGGTACGCCGCCCCTTCGAGTACCCACAGTACTACCTGGCTGAGCCATG	1	1e-05	0
GACTGGCACAGAAGGCCCTACCTTCTACGTGCCCTTCTCCAA--CGATGGGTGTGGTACGCAGCCCCTTCGAGTACCCACAGTACTACCTGGCTGAGCCATG	1	1e-05	0
GAATGGCACAGAACGCCCTAACTTCTACGTGCCCTTCTCCAATGCGATGGGTGTGGTACGCAGCCCCTTCGAGTACCCACAGTACTACCTGGCTGAGCCATG	1	1e-05	43G
GAATGGCACAGAAGGCCCTAACTTCTACGTCCCCTTCTCCAA--CGATGGGTGTGGTACGCAGCCCCTTCGAGTACCCACAGTACTACCTGGCTGAGCCATG	1	1e-05	0
GAATGGCACAGAAGGCCCTAACTTCTACGTGCCCTTCT--------------------------CCCTTCGAGTACCCACAGTACTACCTGGCTGAGTCATG	1	1e-05	0
GAATGGCACAGAAGGCCCTAACTTCTACGTTCCCTTCTCCAAT-CGATGGGTGTGGTACGCAGCCCCTTCGAGTACCCACAGTACTGCCTGGCTGAGCCATG	1	1e-05	0
[truncated: 926 more rows]
