# Supplementary material for: Allele-specific gene-editing approach for vision loss restoration in RHO-associated retinitis pigmentosa
Source: eLife journal article supplement (doi:10.7554/elife.84065), 2023-06-05
Supplement: data3 [file Figure 8-Source Data1.xlsx]

## Sheet: Sheet1
intensity(cd*s/m2)	CTRL a-wave												17-Sg2 a-wave																	CTRL b-wave												17-Sg2 b-wave
0.003	36.5	44.26	0.796	4.925	43.31	42.27	11.1	9.329	5.25	9.243			7.567	15.72	7.958	6.629	4.605	6.118	5.056	14.68	5.716	33.72	24.36	8.181	4.827	2.605	3.595	15.75		95.05	73.37	140	167.5	61.86	70.74	150.5	136.8	52.74	92.65			205.1	108.7	160.3	133.3	216.7	148.8	89.57	139.9
0.01	15.02	8.619	11.76	16.66	15.46	7.209	33.91	22.3	5.784	6.178			10.91	4.773	11.62	8.179	30.4	16.18	8.788	13.06	8.639	12.42	39.76	6.266	3.38	0.455	0.577	33.21		168.4	131.3	155.6	169.3	151.7	130.8	196.5	147.6	66.12	111.8			238.5	140.9	183	127.4	249.7	151.5	122.6	138.4
0.1	56.87	37.45	53.21	47.92	49.34	48.51	32.8	17.9	14.41	25.68			59.59	34.86	71.34	41.53	81.51	54.67	20.83	54.38	53.02	62.86	73.25	5.109	13.26	22.13	22.25	77.76		222	156.2	232.1	250.4	190.8	143.6	239	203.1	121.7	147.3			288.9	188.8	216.1	141.9	326.9	212.8	171.5	204.2
1	71.69	46.88	42.05	43.15	41.6	15.42	56.61	40.5	37.5	46.83			55.36	30.32	61.1	41.01	109.6	77.13	49.57	71.81	60.1	66.03	78.5	8.879	49.78	34.04	43.46	104		222.5	190	256	276.1	215.4	146.3	265.1	251.8	167.9	179.4			300.3	253.9	252.2	168.1	353.1	232.9	219.2	274.9
3	73.29	52.98	46.76	114.4	68	47.91	68.88	60.25	31.32	38.65			83.16	61.32	72.57	46.28	128.8	88.22	55.91	77.41	76.59	78.38	82.02	23.95	35.57	57.3	51.74	134		249.2	218.8	257.7	251.3	216	168.2	248.9	268.4	165.1	168.7			285	267.2	259.3	173.3	357.4	255.1	225.5	271.7
10	87	58.41	76.18	89.66	69.35	41.68	63.49	51.33	43.69	58.9			114.5	99.85	86.94	52.12	139.8	98.09	69.53	99.43	88.37	111.3	88.33	55.13	73.37	80.1	68.75	145.4		259.3	190.7	242.5	261.3	251.1	176.8	266.9	278	163.4	181.6			278.5	282	285.2	202.2	369.6	268	216.3	284.4
100	119.7	94.14	72.93	101.1	95.06	50.65	105.4	103.9	57.12	64.82			106.1	117.3	112.4	75.56	163.2	117.1	103.9	115.4	82.81	128.5	128	64.04	90.29	90.22	82.12	169.5		274.4	234.1	252	312.3	266.5	166.8	253.4	266.1	193.9	186.8			332	354.2	309.7	217.9	353	232.3	277.3	290.5
[truncated: 8 more columns]
