# Supplementary material for: Allele-specific gene-editing approach for vision loss restoration in RHO-associated retinitis pigmentosa
Source: eLife journal article supplement (doi:10.7554/elife.84065), 2023-06-05
Supplement: data3 [file Figure 8-Source Data2.xlsx]

## Sheet: Sheet1
intensity(cd*s/m2)	CTRL a-wave												17-Sg2 a-wave																		CTRL b-wave												17-Sg2 b-wave
0.003	8.929	21.28	32.94	27.59	15.62	10.53	18.7	7.99	21.85	20.76			11.42	14.18	1.71	4.961	6.839	15.8	19.52	17.05	7.535	2.014	4.964	10.79	8.843	47.2	6.12	1.748			77.99	118.2	80.48	79.56	103.9	92.94	72.18	75.15	37.81	156.5			166.4	151	150	149.8	71.43	130.1	138.8
0.01	24.81	35.11	6.047	8.501	7.557	8.423	18.92	22.94	14.73	30.26			23.11	26.64	11.76	2.294	20.07	20.93	23.89	17.74	5.649	1.764	24.86	25.56	11.78	1.694	11.83	19.79			102.7	142.7	98.12	129.8	99.75	172.9	100.7	96.08	79.29	241.6			216.1	201.6	208.6	221	116.3	154.7	195.5
0.1	20.51	33.8	31.51	54.78	9.459	20.36	36.28	28.32	24.24	80.11			55.27	64.81	56.45	68.72	29.08	44.04	48.16	26.28	33.77	26.19	8.069	12.17	25.48	67.31	22.15	55.67			137.6	188.7	146	176.2	131.8	211.2	141.6	148.2	110.5	330			276.9	266.1	250	252.1	137.2	189.2	229.4
1	29.61	50.11	50.92	42.8	42.44	71.41	24.29	43.34	39.08	98.44			76.28	79.87	64.66	77.97	38.8	59.42	76.67	64.53	55.44	44.7	53.07	68.52	63.67	65.78	36.48	70.81			156	210.6	206.9	182.3	148.6	229	145.1	157.6	148.4	333.1			329.5	282.4	246.7	279	159.7	219.8	271.9
3	26.52	42.5	40.97	17.75	31.02	44.76	39.33	40.63	40.69	107.6			91.11	95.06	76.67	93.52	40.13	63.91	90.75	73.28	69.44	51.81	79.97	77.64	59.89	85.84	63.23	87.63			168.6	222.7	220.4	180.5	133.7	226.2	160.5	175.2	169.9	357.9			267.5	287.5	265.8	230.3	152.3	217.5	284.2
10	46.33	59.87	21.4	35.39	48.34	79.75	58.21	56.21	52.65	122.9			122.2	120.6	79.44	103.6	52.32	80.48	118.6	96.66	81.59	72.22	51.29	67.15	49.35	79.81	66.93	91.07			172.3	234.8	212	202	176.3	249.9	152.6	167	220.9	333.9			373.5	318.5	301.7	311.6	167	244.6	259.4
100	71.71	96.52	91.35	67.94	49.68	98.03	43.28	51.81	82.03	146.3			151.7	143.9	75.42	106.4	70.48	96.99	132.9	103.2	78.68	96.79	85.75	95.22	87.26	122.6	106.5	126.4			181.6	239	260.6	194.3	166.5	279.7	180.9	208.5	226.5	333.2			301.5	316.4	321.1	363.8	171.9	242.8	344.5
[truncated: 9 more columns]
