# Supplementary material for: Allele-specific gene-editing approach for vision loss restoration in RHO-associated retinitis pigmentosa
Source: eLife journal article supplement (doi:10.7554/elife.84065), 2023-06-05
Supplement: data3 [file Figure 8-Source Data3.xlsx]

## Sheet: Sheet1
intensity(cd*s/m2)	CTRL a-wave								17-Sg2 a-wave										CTRL b-wave								17-Sg2 b-wave
0.003	5.303	11.34	13.37	21.02	0.074	6.919			5.247	2.543	13.29	6.363	3.164	10.01	6.203	5.107			112.2	102.5	63.05	95.93	114.3	109.1			98.06	101.9	166.7	139.6	70.21	162.7	111.4	138.5
0.01	10.92	20.9	4.28	3.779	8.563	21.34			15.33	17.47	18.9	8.836	7.903	20.82	15.76	15.03			139.6	137.8	78.51	116.7	136.1	151.7			120.6	144	195.4	190.9	107	209.8	124.2	154.5
0.1	29.18	34.13	37.02	24.92	11.64	43.47			22.44	42.16	43.11	68.99	24.65	56.94	33.72	42.93			200.4	184.6	96.62	159.3	161.3	224.8			175.4	205.3	288	229.9	136.1	273.2	150.1	176.9
1	51.38	56.49	23.3	23.62	34.76	53.33			58.02	57.55	83.42	63.62	54.25	89.74	60.88	67.41			216.6	222.7	128.9	185.7	194.8	207.4			230.2	219.6	345.5	266.8	187.1	326.3	201	223
3	45.86	49.37	57.13	58.63	42.52	49.54			51.52	53.23	75.32	69.44	56.32	91.5	64.03	65.33			208.9	230.9	122.5	186.5	196.1	214.9			232.3	218.1	341.6	250	201.4	343.6	216.4	224.7
10	55.17	55.19	16.16	21.41	56.97	55.61			60.24	67.08	69.49	70.52	56.32	79.86	57.6	59.76			224.4	244.3	134.3	196.2	211.7	231.8			240.6	205.7	336.3	238.4	227.4	356.1	226.4	221.7
100	50.59	60.68	23.52	30.71	66.13	64.62			74.98	69.36	96.29	83.08	60.14	102.7	62.13	56.67			214.3	233.1	136.6	193.3	206.2	209.4			222.7	212	322.8	232.9	233.7	350.6	225.3	201.8
