# Supplementary material for: Allele-specific gene-editing approach for vision loss restoration in RHO-associated retinitis pigmentosa
Source: eLife journal article supplement (doi:10.7554/elife.84065), 2023-06-05
Supplement: data3 [file Figure 10CSource Data2.xlsx]

## Sheet: Figure 10C–Source Data
SampleID	293T-17m2-gDNA
Total_SNVs	3366802
ncRNA_splicing	405
splicing	2345
UTR5	5518
ncRNA_exonic	12919
upstream	21082
exonic	21093
downstream	21560
UTR3	29404
ncRNA_intronic	216905
intronic	1183939
intergenic	1850825
